# Supplementary material for: Impact of Nonoptimal Intakes of Saturated, Polyunsaturated, and Trans Fat on Global Burdens of Coronary Heart Disease
Source: PubMed Central journal article supplement — J Am Heart Assoc. 2016 Jan 20;5(1):e002891. doi: 10.1161/JAHA.115.002891 (PMC4859401; doi:10.1161/jaha.115.002891), 2016-01-20
Supplement: JAH3-5-e002891-s001.pdf [file JAH3-5-e002891-s001.pdf]

## **SUPPLEMENTAL MATERIAL**

Table S1: CHD Mortality Attributable to SFA, n-6PUFA and TFA in 2010 by country, age, and sex

|                            | Population | CHD Deaths | Mean Intake Level (95%UI)* |                |                | Total CHD Deaths due to (95%UI) |                                      |                            | CHD Deaths/Million Population due to (95%UI) |                                      |                            | Proportion of CHD Deaths (%) due to (95%UI) |                                      |                            |
|----------------------------|------------|------------|----------------------------|----------------|----------------|---------------------------------|--------------------------------------|----------------------------|----------------------------------------------|--------------------------------------|----------------------------|---------------------------------------------|--------------------------------------|----------------------------|
|                            |            |            | SFA(%E)                    | N-6 PUFA(%E)   | TFA(%E)        | Higher SFA (>10%E) Intake†      | Insufficient N-6 PUFA (<12%E)intake‡ | High TFA (>0.5%E) intake § | Higher SFA (>10%E) Intake†                   | Insufficient N-6 PUFA (<12%E)intake‡ | High TFA (>0.5%E) intake § | Higher SFA (>10%E) Intake†                  | Insufficient N-6 PUFA (<12%E)intake‡ | High TFA (>0.5%E) intake § |
| <b>Albania</b>             |            |            |                            |                |                |                                 |                                      |                            |                                              |                                      |                            |                                             |                                      |                            |
| Age 25-69                  | 1676962    | 1740       | 10.9 (10.1, 11.8)          | 7.8 (7.1, 8.4) | 0.9 (0.8, 1.1) | 56 (38, 80)                     | 167 (127, 214)                       | 94 (64, 128)               | 33 (23, 48)                                  | 99 (76, 128)                         | 56 (38, 76)                | 3.2 (2.5, 4)                                | 9.6 (8, 11.2)                        | 5.4 (4.2, 6.6)             |
| Age 70+                    | 199958     | 3710       | 10.9 (9.4, 12.3)           | 7.5 (6.4, 8.7) | 0.9 (0.6, 1.1) | 84 (52, 128)                    | 255 (183, 335)                       | 125 (77, 184)              | 420 (259, 639)                               | 1276 (914, 1673)                     | 628 (387, 922)             | 2.3 (1.2, 3.3)                              | 6.9 (4.9, 8.8)                       | 3.4 (2, 4.8)               |
| Female                     | 959484     | 2300       | 11 (8.6, 13.4)             | 7.8 (5.9, 9.8) | 0.9 (0.6, 1.3) | 60 (36, 98)                     | 166 (112, 227)                       | 88 (50, 134)               | 63 (37, 102)                                 | 173 (117, 237)                       | 91 (52, 139)               | 2.6 (1.8, 3.5)                              | 7.2 (5.5, 9)                         | 3.8 (2.6, 5)               |
| Male                       | 917436     | 3158       | 10.8 (8.4, 13.1)           | 7.7 (5.8, 9.6) | 0.9 (0.5, 1.3) | 80 (54, 113)                    | 256 (198, 323)                       | 132 (84, 179)              | 87 (59, 124)                                 | 279 (216, 352)                       | 144 (91, 195)              | 2.5 (1.7, 3.4)                              | 8.1 (6.3, 9.8)                       | 4.2 (2.9, 5.5)             |
| All                        | 1876920    | 5454       | 10.9 (9.2, 12.6)           | 7.8 (6.4, 9.1) | 0.9 (0.7, 1.2) | 140 (103, 188)                  | 422 (339, 519)                       | 220 (159, 287)             | 75 (55, 100)                                 | 225 (181, 276)                       | 117 (85, 153)              | 2.6 (1.9, 3.2)                              | 7.7 (6.4, 9)                         | 4 (3.1, 4.9)               |
| <b>Algeria</b>             |            |            |                            |                |                |                                 |                                      |                            |                                              |                                      |                            |                                             |                                      |                            |
| Age 25-69                  | 17518912   | 7772       | 8.1 (7.8, 8.4)             | 4 (3.8, 4.2)   | 1 (0.9, 1.1)   | 108 (84, 131)                   | 1388 (1156, 1629)                    | 499 (423, 583)             | 6 (5, 7)                                     | 79 (66, 93)                          | 29 (24, 33)                | 1.4 (1.1, 1.6)                              | 17.9 (15.8, 20.1)                    | 6.4 (5.5, 7.3)             |
| Age 70+                    | 1064394    | 10884      | 8 (7.5, 8.5)               | 3.8 (3.6, 4.1) | 0.9 (0.8, 1)   | 94 (67, 126)                    | 1313 (1033, 1643)                    | 413 (330, 511)             | 88 (63, 118)                                 | 1234 (970, 1544)                     | 388 (310, 480)             | 0.9 (0.6, 1.1)                              | 12.1 (9.6, 14.6)                     | 3.8 (2.9, 4.7)             |
| Female                     | 9308658    | 9050       | 8.2 (6.4, 10)              | 4 (2.9, 5.1)   | 1 (0.6, 1.4)   | 93 (71, 125)                    | 1246 (998, 1545)                     | 429 (343, 524)             | 10 (8, 13)                                   | 134 (107, 166)                       | 46 (37, 56)                | 1 (0.8, 1.3)                                | 13.8 (11.1, 16.3)                    | 4.7 (3.9, 5.5)             |
| Male                       | 9274648    | 9638       | 8 (6.2, 9.7)               | 3.9 (2.9, 5)   | 1 (0.6, 1.4)   | 108 (84, 136)                   | 1455 (1198, 1733)                    | 484 (405, 578)             | 12 (9, 15)                                   | 157 (129, 187)                       | 52 (44, 62)                | 1.1 (0.8, 1.4)                              | 15.1 (12.3, 17.9)                    | 5 (4.1, 6)                 |
| All                        | 18583306   | 18699      | 8.1 (6.8, 9.4)             | 4 (3.2, 4.7)   | 1 (0.7, 1.3)   | 202 (167, 241)                  | 2702 (2339, 3118)                    | 913 (800, 1035)            | 11 (9, 13)                                   | 145 (126, 168)                       | 49 (43, 56)                | 1.1 (0.9, 1.3)                              | 14.4 (12.8, 16.2)                    | 4.9 (4.3, 5.5)             |
| <b>Andorra</b>             |            |            |                            |                |                |                                 |                                      |                            |                                              |                                      |                            |                                             |                                      |                            |
| Age 25-69                  | 49610      | 22         | 11.8 (11, 12.6)            | 5.5 (5.2, 5.9) | 1.2 (1.1, 1.4) | 1 (1, 1)                        | 3 (2, 4)                             | 2 (1, 3)                   | 18 (12, 25)                                  | 62 (46, 78)                          | 38 (26, 54)                | 4 (3.3, 4.8)                                | 13.7 (12, 15.4)                      | 8.4 (6.9, 10)              |
| Age 70+                    | 10946      | 152        | 11.8 (10.4, 13.4)          | 5.3 (4.6, 5.9) | 1.2 (0.9, 1.5) | 5 (3, 7)                        | 15 (10, 20)                          | 8 (5, 13)                  | 425 (253, 659)                               | 1348 (929, 1824)                     | 773 (425, 1220)            | 3.1 (2, 4.1)                                | 9.7 (7.5, 11.8)                      | 5.6 (3.7, 7.4)             |
| Female                     | 31381      | 90         | 11.9 (9.3, 14.5)           | 5.5 (4.1, 6.9) | 1.3 (0.8, 1.7) | 3 (1, 5)                        | 9 (5, 13)                            | 5 (2, 9)                   | 92 (42, 163)                                 | 278 (155, 430)                       | 161 (65, 289)              | 3.2 (2.5, 4)                                | 9.7 (8.1, 11.3)                      | 5.6 (4.4, 6.9)             |
| Male                       | 29175      | 85         | 11.7 (9.1, 14.3)           | 5.4 (4, 6.8)   | 1.2 (0.8, 1.6) | 3 (2, 4)                        | 9 (6, 12)                            | 5 (3, 8)                   | 91 (58, 134)                                 | 311 (220, 412)                       | 182 (104, 276)             | 3.1 (2.4, 3.9)                              | 10.7 (9, 12.5)                       | 6.3 (4.7, 7.9)             |
| All                        | 60556      | 175        | 11.8 (10, 13.7)            | 5.5 (4.5, 6.5) | 1.2 (0.9, 1.5) | 6 (4, 8)                        | 18 (13, 23)                          | 10 (6, 15)                 | 92 (61, 136)                                 | 294 (220, 383)                       | 171 (105, 250)             | 3.2 (2.7, 3.7)                              | 10.2 (9, 11.3)                       | 5.9 (4.9, 6.9)             |
| <b>Angola</b>              |            |            |                            |                |                |                                 |                                      |                            |                                              |                                      |                            |                                             |                                      |                            |
| Age 25-69                  | 6154349    | 3362       | 12.2 (11.3, 13.2)          | 6.2 (5.7, 6.7) | 0.7 (0.6, 0.8) | 176 (123, 237)                  | 449 (330, 578)                       | 113 (73, 164)              | 29 (20, 39)                                  | 73 (54, 94)                          | 18 (12, 27)                | 5.2 (4.1, 6.3)                              | 13.3 (11.4, 15.3)                    | 3.4 (2.4, 4.4)             |
| Age 70+                    | 267963     | 2439       | 12.1 (10.6, 13.8)          | 5.9 (5.1, 6.8) | 0.7 (0.5, 0.8) | 89 (57, 133)                    | 229 (156, 319)                       | 51 (27, 83)                | 331 (211, 495)                               | 854 (584, 1189)                      | 191 (100, 309)             | 3.6 (2.2, 4.9)                              | 9.4 (7, 11.9)                        | 2.1 (1, 3.1)               |
| Female                     | 3301431    | 2378       | 12.4 (9.7, 15.1)           | 6.2 (4.7, 7.8) | 0.7 (0.4, 1.1) | 111 (76, 158)                   | 258 (187, 346)                       | 66 (38, 100)               | 34 (23, 48)                                  | 78 (57, 105)                         | 20 (11, 30)                | 4.6 (3.3, 5.9)                              | 10.8 (8.5, 13)                       | 2.8 (1.7, 3.9)             |
| Male                       | 3120881    | 3448       | 12 (9.4, 14.7)             | 6.1 (4.6, 7.6) | 0.7 (0.4, 1)   | 154 (101, 210)                  | 420 (299, 549)                       | 98 (60, 145)               | 49 (32, 67)                                  | 135 (96, 176)                        | 31 (19, 46)                | 4.5 (3.1, 5.8)                              | 12.2 (9.5, 14.7)                     | 2.9 (1.8, 3.9)             |
| All                        | 6422312    | 5821       | 12.2 (10.3, 14.1)          | 6.2 (5.1, 7.3) | 0.7 (0.5, 1)   | 264 (203, 333)                  | 678 (540, 817)                       | 165 (115, 223)             | 41 (32, 52)                                  | 106 (84, 127)                        | 26 (18, 35)                | 4.5 (3.6, 5.4)                              | 11.6 (9.9, 13.3)                     | 2.8 (2, 3.7)               |
| <b>Antigua and Barbuda</b> |            |            |                            |                |                |                                 |                                      |                            |                                              |                                      |                            |                                             |                                      |                            |
| Age 25-69                  | 42626      | 20         | 6.8 (6.2, 7.3)             | 4.8 (4.4, 5.1) | 0.5 (0.4, 0.6) | 0 (0, 0)                        | 3 (3, 4)                             | 0 (0, 0)                   | 7 (5, 10)                                    | 73 (59, 86)                          | 6 (3, 9)                   | 1.6 (1.2, 1.9)                              | 15.6 (13.6, 17.5)                    | 1.2 (0.8, 1.7)             |
| Age 70+                    | 4625       | 58         | 6.8 (5.9, 7.6)             | 4.6 (4, 5.2)   | 0.4 (0.3, 0.6) | 1 (0, 1)                        | 6 (5, 8)                             | 0 (0, 1)                   | 125 (74, 202)                                | 1341 (1001, 1730)                    | 86 (34, 160)               | 1 (0.6, 1.4)                                | 10.7 (8.4, 13)                       | 0.7 (0.3, 1.1)             |
| Female                     | 24244      | 36         | 6.9 (5.3, 8.4)             | 4.8 (3.6, 6)   | 0.5 (0.2, 0.8) | 0 (0, 1)                        | 4 (3, 5)                             | 0 (0, 1)                   | 16 (9, 28)                                   | 168 (119, 225)                       | 12 (5, 23)                 | 1.1 (0.7, 1.5)                              | 11.3 (9.3, 13.4)                     | 0.8 (0.4, 1.2)             |
| Male                       | 23007      | 41         | 6.7 (5.2, 8.2)             | 4.7 (3.5, 5.9) | 0.5 (0.2, 0.8) | 0 (0, 1)                        | 5 (4, 6)                             | 0 (0, 1)                   | 21 (14, 31)                                  | 226 (176, 279)                       | 15 (8, 26)                 | 1.2 (0.8, 1.6)                              | 12.6 (10.6, 14.6)                    | 0.9 (0.4, 1.2)             |
| All                        | 47251      | 78         | 6.8 (5.7, 7.8)             | 4.7 (3.9, 5.6) | 0.5 (0.3, 0.7) | 1 (1, 1)                        | 9 (8, 11)                            | 1 (0, 1)                   | 19 (13, 27)                                  | 197 (160, 235)                       | 14 (8, 21)                 | 1.1 (0.9, 1.4)                              | 12 (10.5, 13.4)                      | 0.8 (0.6, 1.1)             |
| <b>Argentina</b>           |            |            |                            |                |                |                                 |                                      |                            |                                              |                                      |                            |                                             |                                      |                            |
| Age 25-69                  | 20692824   | 13240      | 9.1 (8.5, 9.7)             | 6.7 (6.1, 7.2) | 1 (0.9, 1)     | 268 (185, 386)                  | 1576 (1263, 1907)                    | 767 (661, 880)             | 13 (9, 19)                                   | 76 (61, 92)                          | 37 (32, 43)                | 2 (1.5, 2.5)                                | 11.9 (10.2, 13.7)                    | 5.8 (5.2, 6.3)             |
| Age 70+                    | 2934018    | 35699      | 9.1 (8.1, 10.2)            | 6.4 (5.6, 7.3) | 0.9 (0.8, 1)   | 459 (265, 763)                  | 2950 (2097, 3861)                    | 1236 (979, 1532)           | 156 (90, 260)                                | 1006 (715, 1316)                     | 421 (334, 522)             | 1.3 (0.7, 1.9)                              | 8.3 (6.3, 10.2)                      | 3.5 (2.9, 4.1)             |
| Female                     | 12387114   | 23605      | 9.2 (7.2, 11.3)            | 6.7 (5, 8.3)   | 1 (0.6, 1.4)   | 331 (180, 612)                  | 2050 (1359, 2868)                    | 914 (700, 1158)            | 27 (14, 49)                                  | 166 (110, 232)                       | 74 (57, 93)                | 1.4 (0.9, 1.9)                              | 8.7 (7, 10.3)                        | 3.9 (3.3, 4.4)             |
| Male                       | 11239728   | 25239      | 9 (7, 10.9)                | 6.6 (4.9, 8.2) | 1 (0.6, 1.3)   | 396 (268, 588)                  | 2476 (1941, 3070)                    | 1090 (912, 1272)           | 35 (24, 52)                                  | 220 (173, 273)                       | 97 (81, 113)               | 1.6 (1, 2.1)                                | 9.8 (7.9, 11.8)                      | 4.3 (3.8, 4.9)             |

|                   |          |       |                   |                |                |                   |                   |                   |                   |                   |                   |                 |                   |                   |
|-------------------|----------|-------|-------------------|----------------|----------------|-------------------|-------------------|-------------------|-------------------|-------------------|-------------------|-----------------|-------------------|-------------------|
| All               | 23626842 | 48912 | 9.1 (7.7, 10.5)   | 6.6 (5.5, 7.8) | 1 (0.7, 1.2)   | 728 (512, 1052)   | 4526 (3577, 5505) | 2004 (1730, 2331) | 31 (22, 45)       | 192 (151, 233)    | 85 (73, 99)       | 1.5 (1.1, 1.9)  | 9.3 (8, 10.5)     | 4.1 (3.7, 4.5)    |
| <b>Armenia</b>    |          |       |                   |                |                |                   |                   |                   |                   |                   |                   |                 |                   |                   |
| Age 25-69         | 1618907  | 2225  | 13.8 (12.8, 14.9) | 6.4 (5.9, 6.9) | 1 (0.8, 1.1)   | 188 (145, 234)    | 287 (230, 346)    | 138 (98, 181)     | 116 (90, 145)     | 177 (142, 214)    | 85 (61, 112)      | 8.5 (7.1, 9.9)  | 12.9 (11, 14.7)   | 6.2 (4.7, 7.6)    |
| Age 70+           | 277589   | 7798  | 13.8 (12, 15.5)   | 6.2 (5.4, 6.9) | 0.9 (0.7, 1.2) | 454 (309, 595)    | 681 (492, 864)    | 277 (161, 407)    | 1637 (1114, 2145) | 2454 (1774, 3111) | 999 (582, 1465)   | 5.8 (4.2, 7.4)  | 8.7 (6.5, 10.9)   | 3.6 (2, 5)        |
| Female            | 1079619  | 4621  | 14 (11, 17.1)     | 6.4 (4.8, 8)   | 1 (0.6, 1.4)   | 295 (187, 420)    | 414 (273, 569)    | 177 (87, 288)     | 273 (173, 389)    | 383 (253, 527)    | 164 (80, 267)     | 6.4 (5, 7.7)    | 9 (7.3, 10.5)     | 3.8 (2.7, 4.9)    |
| Male              | 816877   | 5393  | 13.6 (10.6, 16.5) | 6.3 (4.7, 7.9) | 1 (0.6, 1.4)   | 348 (256, 452)    | 555 (429, 688)    | 239 (159, 328)    | 426 (314, 554)    | 679 (525, 842)    | 293 (194, 401)    | 6.5 (5, 8)      | 10.3 (8.1, 12.4)  | 4.4 (3.1, 5.8)    |
| All               | 1896496  | 10010 | 13.8 (11.7, 16)   | 6.4 (5.2, 7.5) | 1 (0.7, 1.2)   | 643 (491, 792)    | 968 (771, 1163)   | 416 (292, 558)    | 339 (259, 417)    | 511 (407, 613)    | 219 (154, 294)    | 6.4 (5.5, 7.3)  | 9.7 (8.4, 11)     | 4.1 (3.3, 5)      |
| <b>Australia</b>  |          |       |                   |                |                |                   |                   |                   |                   |                   |                   |                 |                   |                   |
| Age 25-69         | 12434750 | 4867  | 13.5 (13.3, 13.7) | 5 (5, 5.1)     | 1.3 (1.2, 1.3) | 358 (292, 427)    | 731 (600, 872)    | 437 (374, 506)    | 29 (23, 34)       | 59 (48, 70)       | 35 (30, 41)       | 7.3 (6.5, 8.2)  | 15 (13.2, 16.7)   | 9 (8.2, 9.8)      |
| Age 70+           | 2104250  | 26473 | 13.5 (13.2, 13.8) | 4.9 (4.7, 5)   | 1.2 (1.1, 1.3) | 1398 (979, 1809)  | 2707 (1926, 3493) | 1420 (1117, 1747) | 664 (465, 860)    | 1286 (915, 1660)  | 675 (531, 830)    | 5.3 (4.2, 6.4)  | 10.2 (8.4, 12.2)  | 5.4 (4.6, 6.2)    |
| Female            | 7417239  | 15265 | 13.7 (10.7, 16.7) | 5.1 (3.8, 6.4) | 1.3 (0.8, 1.7) | 870 (521, 1232)   | 1591 (970, 2219)  | 863 (624, 1157)   | 117 (70, 166)     | 215 (131, 299)    | 116 (84, 156)     | 5.7 (4.8, 6.6)  | 10.4 (8.9, 11.9)  | 5.7 (5, 6.3)      |
| Male              | 7121761  | 16109 | 13.3 (10.4, 16.2) | 5 (3.7, 6.2)   | 1.3 (0.8, 1.7) | 886 (629, 1139)   | 1847 (1327, 2341) | 995 (810, 1198)   | 124 (88, 160)     | 259 (186, 329)    | 140 (114, 168)    | 5.5 (4.5, 6.4)  | 11.5 (9.7, 13.1)  | 6.2 (5.5, 6.9)    |
| All               | 14539000 | 31344 | 13.5 (11.4, 15.6) | 5 (4.1, 5.9)   | 1.3 (1, 1.6)   | 1755 (1326, 2180) | 3438 (2631, 4241) | 1858 (1540, 2191) | 121 (91, 150)     | 236 (181, 292)    | 128 (106, 151)    | 5.6 (5, 6.2)    | 11 (9.9, 12.2)    | 5.9 (5.5, 6.4)    |
| <b>Austria</b>    |          |       |                   |                |                |                   |                   |                   |                   |                   |                   |                 |                   |                   |
| Age 25-69         | 5079377  | 2554  | 14.8 (14.5, 15.1) | 5.7 (5.3, 6)   | 1.3 (1.3, 1.4) | 249 (198, 311)    | 344 (277, 423)    | 239 (201, 278)    | 49 (39, 61)       | 68 (54, 83)       | 47 (40, 55)       | 9.7 (8.4, 11.2) | 13.5 (11.9, 15)   | 9.4 (8.5, 10.2)   |
| Age 70+           | 1043845  | 15941 | 14.8 (14.3, 15.4) | 5.4 (4.7, 6.1) | 1.3 (1.2, 1.4) | 1132 (781, 1537)  | 1512 (1072, 1994) | 975 (767, 1201)   | 1085 (749, 1472)  | 1448 (1027, 1910) | 934 (734, 1151)   | 7.1 (5.4, 8.9)  | 9.5 (7.5, 11.5)   | 6.1 (5.2, 7.2)    |
| Female            | 3192612  | 10147 | 14.9 (11.7, 18.2) | 5.6 (4.2, 7.1) | 1.3 (0.9, 1.8) | 755 (446, 1131)   | 975 (595, 1403)   | 645 (467, 858)    | 236 (140, 354)    | 306 (186, 439)    | 202 (146, 269)    | 7.5 (6.2, 8.8)  | 9.6 (8.1, 11.1)   | 6.4 (5.6, 7.1)    |
| Male              | 2930610  | 8348  | 14.6 (11.4, 17.8) | 5.6 (4.2, 7)   | 1.3 (0.9, 1.7) | 626 (454, 823)    | 880 (648, 1131)   | 569 (472, 680)    | 214 (155, 281)    | 300 (221, 386)    | 194 (161, 232)    | 7.5 (6.2, 8.9)  | 10.5 (8.8, 12.2)  | 6.8 (6, 7.6)      |
| All               | 6123222  | 18523 | 14.8 (12.5, 17.1) | 5.6 (4.6, 6.6) | 1.3 (1, 1.6)   | 1381 (1024, 1795) | 1855 (1412, 2348) | 1213 (990, 1448)  | 226 (167, 293)    | 303 (231, 383)    | 198 (162, 236)    | 7.5 (6.5, 8.4)  | 10 (8.9, 11.2)    | 6.6 (6, 7.1)      |
| <b>Azerbaijan</b> |          |       |                   |                |                |                   |                   |                   |                   |                   |                   |                 |                   |                   |
| Age 25-69         | 4881004  | 6332  | 15 (13.8, 16.1)   | 6.5 (6, 7)     | 1.1 (1, 1.1)   | 712 (589, 845)    | 827 (691, 975)    | 449 (389, 516)    | 146 (121, 173)    | 169 (142, 200)    | 92 (80, 106)      | 11.3 (9.5, 13)  | 13.1 (11.2, 14.9) | 7.1 (6.3, 7.9)    |
| Age 70+           | 458128   | 12360 | 14.9 (13, 16.7)   | 6.2 (5.4, 7)   | 1 (0.9, 1.1)   | 931 (705, 1188)   | 1088 (830, 1371)  | 500 (409, 597)    | 2033 (1538, 2593) | 2375 (1811, 2992) | 1091 (894, 1304)  | 7.5 (5.5, 9.5)  | 8.8 (6.7, 10.8)   | 4.1 (3.2, 4.8)    |
| Female            | 2813949  | 8055  | 15.2 (11.9, 18.5) | 6.5 (4.8, 8.1) | 1.1 (0.7, 1.5) | 704 (519, 915)    | 768 (572, 990)    | 381 (310, 460)    | 250 (184, 325)    | 273 (203, 352)    | 136 (110, 164)    | 8.7 (6.9, 10.6) | 9.5 (7.7, 11.4)   | 4.7 (4, 5.5)      |
| Male              | 2525183  | 10659 | 14.7 (11.5, 17.9) | 6.4 (4.8, 8)   | 1 (0.6, 1.4)   | 939 (745, 1129)   | 1147 (923, 1364)  | 568 (478, 664)    | 372 (295, 447)    | 454 (365, 540)    | 225 (189, 263)    | 8.8 (6.7, 10.6) | 10.8 (8.6, 13)    | 5.3 (4.5, 6.2)    |
| All               | 5339132  | 18690 | 15 (12.7, 17.3)   | 6.4 (5.3, 7.6) | 1 (0.8, 1.3)   | 1643 (1390, 1937) | 1915 (1634, 2245) | 949 (834, 1067)   | 308 (260, 363)    | 359 (306, 421)    | 178 (156, 200)    | 8.8 (7.5, 10.1) | 10.2 (8.8, 11.5)  | 5.1 (4.5, 5.7)    |
| <b>Bahrain</b>    |          |       |                   |                |                |                   |                   |                   |                   |                   |                   |                 |                   |                   |
| Age 25-69         | 805561   | 208   | 8.9 (8.3, 9.5)    | 6.4 (5.8, 7)   | 3.2 (2.9, 3.4) | 5 (3, 7)          | 28 (23, 34)       | 62 (54, 71)       | 6 (4, 8)          | 35 (28, 43)       | 77 (66, 89)       | 2.2 (1.5, 3)    | 13.6 (11.2, 16)   | 29.9 (26.8, 33)   |
| Age 70+           | 15734    | 128   | 8.9 (8, 9.7)      | 6.2 (5.3, 7)   | 2.9 (2.6, 3.2) | 2 (1, 3)          | 11 (9, 15)        | 23 (19, 28)       | 107 (64, 169)     | 723 (541, 932)    | 1473 (1196, 1759) | 1.3 (0.7, 2)    | 8.9 (6.5, 11.2)   | 18 (15.1, 21)     |
| Female            | 267785   | 107   | 9.1 (7.1, 11.1)   | 6.5 (4.9, 8.1) | 3.2 (2.5, 4)   | 2 (1, 3)          | 11 (8, 14)        | 24 (20, 29)       | 6 (4, 9)          | 41 (32, 52)       | 91 (75, 108)      | 1.6 (1, 2.3)    | 10.3 (8.1, 12.5)  | 22.8 (19.9, 25.7) |
| Male              | 553510   | 229   | 8.8 (6.9, 10.7)   | 6.3 (4.8, 7.9) | 3.1 (2.4, 3.9) | 5 (3, 6)          | 29 (23, 35)       | 61 (52, 71)       | 8 (6, 12)         | 52 (41, 63)       | 110 (94, 128)     | 2 (1.1, 2.9)    | 12.5 (9.7, 15.4)  | 26.5 (22.7, 30.3) |
| All               | 821295   | 336   | 8.9 (7.5, 10.3)   | 6.4 (5.3, 7.5) | 3.2 (2.6, 3.7) | 6 (5, 8)          | 40 (33, 46)       | 85 (76, 96)       | 8 (6, 10)         | 48 (40, 56)       | 104 (92, 117)     | 1.9 (1.3, 2.6)  | 11.8 (9.8, 13.8)  | 25.4 (22.6, 27.8) |
| <b>Bangladesh</b> |          |       |                   |                |                |                   |                   |                   |                   |                   |                   |                 |                   |                   |
| Age 25-69         | 67766492 | 23431 | 2.3 (2.2, 2.3)    | 4.4 (4.1, 4.8) | 2.4 (2, 2.8)   | 375 (268, 507)    | 4038 (3277, 4844) | 4945 (3810, 6047) | 6 (4, 7)          | 60 (48, 71)       | 73 (56, 89)       | 1.6 (1.1, 2)    | 17.2 (15, 19.3)   | 21.1 (17.6, 24.4) |
| Age 70+           | 4216912  | 24443 | 2.3 (2.2, 2.3)    | 4.3 (3.7, 4.8) | 2.2 (1.7, 2.7) | 245 (149, 387)    | 2853 (2162, 3697) | 3191 (2163, 4390) | 58 (35, 92)       | 677 (513, 877)    | 757 (513, 1041)   | 1 (0.6, 1.4)    | 11.7 (9.1, 14.1)  | 13.1 (9.1, 16.7)  |
| Female            | 35855887 | 14256 | 2.3 (1.8, 2.8)    | 4.5 (3.3, 5.7) | 2.4 (1.8, 3.1) | 177 (118, 255)    | 1944 (1500, 2458) | 2406 (1787, 3128) | 5 (3, 7)          | 54 (42, 69)       | 67 (50, 87)       | 1.2 (0.8, 1.7)  | 13.6 (11.1, 16)   | 17 (13.2, 20.8)   |
| Male              | 36127517 | 33760 | 2.2 (1.7, 2.7)    | 4.4 (3.2, 5.5) | 2.3 (1.7, 2.9) | 444 (308, 616)    | 4947 (3994, 5999) | 5731 (4416, 7172) | 12 (9, 17)        | 137 (111, 166)    | 159 (122, 199)    | 1.3 (0.8, 1.9)  | 14.7 (12.2, 17.1) | 17 (13.1, 21)     |
| All               | 71983404 | 47917 | 2.3 (1.9, 2.6)    | 4.4 (3.6, 5.2) | 2.4 (1.9, 2.8) | 620 (467, 812)    | 6891 (5801, 8012) | 8137 (6572, 9780) | 9 (6, 11)         | 96 (81, 111)      | 113 (91, 136)     | 1.3 (1, 1.6)    | 14.4 (12.6, 16.3) | 16.9 (14.2, 19.6) |
| <b>Barbados</b>   |          |       |                   |                |                |                   |                   |                   |                   |                   |                   |                 |                   |                   |

|                |         |       |                   |                 |                |                   |                   |                   |                   |                   |                   |                 |                   |                   |
|----------------|---------|-------|-------------------|-----------------|----------------|-------------------|-------------------|-------------------|-------------------|-------------------|-------------------|-----------------|-------------------|-------------------|
| Age 25-69      | 163744  | 71    | 7.5 (7.4, 7.7)    | 5.3 (5.1, 5.5)  | 0.2 (0.2, 0.2) | 1 (1, 1)          | 10 (9, 12)        | 0 (0, 0)          | 7 (5, 8)          | 63 (52, 74)       | 0 (0, 0)          | 1.6 (1.3, 1.9)  | 14.6 (12.9, 16.2) | 0.1 (0.1, 0.1)    |
| Age 70+        | 22154   | 211   | 7.5 (7.3, 7.8)    | 5.1 (4.8, 5.4)  | 0.2 (0.2, 0.2) | 2 (1, 3)          | 21 (15, 28)       | 0 (0, 0)          | 96 (65, 137)      | 956 (679, 1243)   | 4 (2, 6)          | 1 (0.7, 1.3)    | 10 (7.9, 12.1)    | 0 (0, 0.1)        |
| Female         | 95593   | 170   | 7.6 (5.9, 9.3)    | 5.3 (4, 6.7)    | 0.2 (0, 0.5)   | 2 (1, 3)          | 18 (12, 24)       | 0 (0, 0)          | 19 (12, 28)       | 188 (129, 249)    | 1 (0, 1)          | 1.1 (0.9, 1.3)  | 10.6 (8.9, 12.2)  | 0 (0, 0.1)        |
| Male           | 90305   | 112   | 7.4 (5.8, 9.1)    | 5.2 (3.9, 6.5)  | 0.2 (0, 0.5)   | 1 (1, 2)          | 14 (11, 16)       | 0 (0, 0)          | 15 (12, 20)       | 150 (121, 182)    | 1 (0, 1)          | 1.2 (1, 1.5)    | 12.1 (10.2, 14.1) | 0 (0, 0.1)        |
| All            | 185898  | 281   | 7.5 (6.4, 8.7)    | 5.3 (4.3, 6.2)  | 0.2 (0, 0.4)   | 3 (2, 4)          | 31 (25, 38)       | 0 (0, 0)          | 17 (13, 22)       | 169 (136, 205)    | 1 (1, 1)          | 1.2 (1, 1.3)    | 11.2 (10.1, 12.3) | 0 (0, 0.1)        |
| <b>Belarus</b> |         |       |                   |                 |                |                   |                   |                   |                   |                   |                   |                 |                   |                   |
| Age 25-69      | 5794791 | 15585 | 14.3 (13.2, 15.3) | 8.5 (7.8, 9.2)  | 1.2 (1, 1.4)   | 1301 (991, 1648)  | 1304 (992, 1651)  | 1274 (917, 1657)  | 225 (171, 284)    | 225 (171, 285)    | 220 (158, 286)    | 8.3 (6.9, 9.8)  | 8.4 (6.9, 9.9)    | 8.2 (6.5, 9.8)    |
| Age 70+        | 998866  | 46235 | 14.2 (12.2, 16.3) | 8.2 (7.2, 9.3)  | 1.1 (0.8, 1.4) | 2715 (1908, 3795) | 2717 (1909, 3796) | 2286 (1353, 3267) | 2718 (1910, 3799) | 2720 (1911, 3800) | 2289 (1355, 3270) | 5.9 (3.9, 8)    | 5.9 (3.9, 7.8)    | 4.9 (3, 6.8)      |
| Female         | 3762408 | 34084 | 14.4 (11.3, 17.5) | 8.6 (6.5, 10.7) | 1.2 (0.8, 1.6) | 2023 (1283, 2964) | 2023 (1283, 2964) | 1804 (1023, 2731) | 538 (341, 788)    | 538 (341, 788)    | 480 (272, 726)    | 5.9 (4.6, 7.2)  | 5.9 (4.5, 7.2)    | 5.3 (3.9, 6.8)    |
| Male           | 3031249 | 27762 | 14 (10.9, 17.1)   | 8.4 (6.3, 10.4) | 1.2 (0.7, 1.6) | 1993 (1502, 2573) | 1997 (1506, 2578) | 1756 (1225, 2334) | 658 (496, 849)    | 659 (497, 850)    | 579 (404, 770)    | 7.2 (5.5, 8.8)  | 7.2 (5.3, 8.9)    | 6.3 (4.6, 8.1)    |
| All            | 6793657 | 61859 | 14.2 (12, 16.4)   | 8.5 (7, 10)     | 1.2 (0.9, 1.5) | 4016 (3137, 5162) | 4020 (3141, 5166) | 3561 (2614, 4600) | 591 (462, 760)    | 592 (462, 760)    | 524 (385, 677)    | 6.5 (5.4, 7.6)  | 6.5 (5.4, 7.6)    | 5.8 (4.7, 6.8)    |
| <b>Belgium</b> |         |       |                   |                 |                |                   |                   |                   |                   |                   |                   |                 |                   |                   |
| Age 25-69      | 6295273 | 3211  | 14.7 (14.4, 15.1) | 5.5 (5.3, 5.7)  | 1 (0.9, 1)     | 318 (254, 383)    | 453 (364, 546)    | 182 (156, 212)    | 50 (40, 61)       | 72 (58, 87)       | 29 (25, 34)       | 9.9 (8.6, 11.2) | 14.1 (12.5, 15.7) | 5.7 (5.2, 6.2)    |
| Age 70+        | 1399988 | 16053 | 14.8 (14.2, 15.3) | 5.3 (4.9, 5.6)  | 0.9 (0.9, 1)   | 1118 (770, 1456)  | 1549 (1082, 1983) | 578 (459, 710)    | 799 (550, 1040)   | 1106 (773, 1417)  | 413 (328, 507)    | 7 (5.4, 8.6)    | 9.6 (7.6, 11.7)   | 3.6 (3, 4.1)      |
| Female         | 3983635 | 9669  | 14.9 (11.7, 18.2) | 5.5 (4.1, 6.9)  | 1 (0.6, 1.4)   | 718 (444, 1024)   | 954 (595, 1345)   | 367 (268, 485)    | 180 (111, 257)    | 240 (149, 338)    | 92 (67, 122)      | 7.5 (6.3, 8.6)  | 9.9 (8.5, 11.3)   | 3.8 (3.4, 4.2)    |
| Male           | 3711626 | 9580  | 14.5 (11.3, 17.7) | 5.4 (4, 6.8)    | 0.9 (0.6, 1.3) | 718 (517, 911)    | 1047 (764, 1309)  | 394 (322, 471)    | 193 (139, 246)    | 282 (206, 353)    | 106 (87, 127)     | 7.5 (6.3, 8.7)  | 10.9 (9.2, 12.6)  | 4.1 (3.6, 4.6)    |
| All            | 7695261 | 19209 | 14.7 (12.4, 17)   | 5.5 (4.5, 6.4)  | 1 (0.7, 1.2)   | 1436 (1070, 1797) | 2002 (1512, 2473) | 760 (642, 894)    | 187 (139, 234)    | 260 (197, 321)    | 99 (83, 116)      | 7.5 (6.6, 8.3)  | 10.4 (9.3, 11.5)  | 4 (3.6, 4.3)      |
| <b>Belize</b>  |         |       |                   |                 |                |                   |                   |                   |                   |                   |                   |                 |                   |                   |
| Age 25-69      | 127524  | 58    | 6.4 (5.9, 6.9)    | 4.2 (3.8, 4.6)  | 0.5 (0.4, 0.6) | 1 (1, 1)          | 10 (8, 12)        | 1 (1, 1)          | 7 (5, 9)          | 79 (66, 91)       | 7 (5, 10)         | 1.5 (1.1, 1.9)  | 17.2 (14.9, 19.4) | 1.6 (1.1, 2.1)    |
| Age 70+        | 8551    | 133   | 6.4 (5.6, 7.1)    | 4 (3.5, 4.6)    | 0.5 (0.3, 0.6) | 1 (1, 2)          | 15 (12, 19)       | 1 (1, 2)          | 142 (88, 215)     | 1789 (1345, 2243) | 136 (62, 236)     | 0.9 (0.5, 1.3)  | 11.5 (9.2, 13.9)  | 0.9 (0.4, 1.4)    |
| Female         | 68458   | 93    | 6.5 (5.1, 7.9)    | 4.2 (3.1, 5.4)  | 0.5 (0.2, 0.8) | 1 (1, 2)          | 12 (9, 15)        | 1 (0, 2)          | 14 (9, 22)        | 172 (128, 223)    | 14 (7, 24)        | 1.1 (0.7, 1.4)  | 12.7 (10.5, 15)   | 1 (0.6, 1.5)      |
| Male           | 67617   | 98    | 6.3 (5, 7.7)      | 4.1 (3, 5.2)    | 0.5 (0.2, 0.8) | 1 (1, 2)          | 14 (11, 16)       | 1 (1, 2)          | 16 (11, 23)       | 201 (161, 242)    | 17 (10, 27)       | 1.1 (0.7, 1.5)  | 13.8 (11.3, 16.4) | 1.2 (0.6, 1.7)    |
| All            | 136075  | 192   | 6.4 (5.4, 7.4)    | 4.2 (3.4, 5)    | 0.5 (0.3, 0.7) | 2 (2, 3)          | 25 (21, 30)       | 2 (1, 3)          | 15 (12, 20)       | 186 (156, 218)    | 15 (10, 22)       | 1.1 (0.8, 1.4)  | 13.2 (11.6, 15)   | 1.1 (0.7, 1.5)    |
| <b>Benin</b>   |         |       |                   |                 |                |                   |                   |                   |                   |                   |                   |                 |                   |                   |
| Age 25-69      | 3084453 | 1280  | 12.2 (11.3, 13.2) | 3.5 (3.2, 3.8)  | 0.8 (0.7, 1)   | 65 (51, 79)       | 238 (194, 281)    | 59 (41, 80)       | 21 (17, 26)       | 77 (63, 91)       | 19 (13, 26)       | 5.1 (4.2, 6)    | 18.6 (16.2, 21)   | 4.6 (3.5, 5.9)    |
| Age 70+        | 152640  | 1119  | 12.2 (10.7, 13.7) | 3.4 (2.9, 3.8)  | 0.8 (0.6, 1)   | 40 (28, 55)       | 145 (109, 185)    | 32 (18, 48)       | 263 (183, 359)    | 949 (716, 1214)   | 207 (116, 317)    | 3.6 (2.5, 4.7)  | 12.9 (9.9, 16)    | 2.8 (1.5, 4.2)    |
| Female         | 1681368 | 1226  | 12.5 (9.7, 15.2)  | 3.5 (2.6, 4.5)  | 0.8 (0.5, 1.2) | 56 (42, 71)       | 188 (146, 231)    | 46 (30, 65)       | 33 (25, 42)       | 112 (87, 137)     | 27 (18, 38)       | 4.5 (3.5, 5.6)  | 15.3 (12.8, 17.8) | 3.7 (2.4, 5.1)    |
| Male           | 1555725 | 1168  | 12.1 (9.4, 14.7)  | 3.5 (2.5, 4.4)  | 0.8 (0.4, 1.2) | 50 (37, 62)       | 195 (154, 233)    | 45 (30, 63)       | 32 (24, 40)       | 126 (99, 150)     | 29 (19, 40)       | 4.3 (3.2, 5.4)  | 16.7 (13.7, 19.7) | 3.8 (2.3, 5.4)    |
| All            | 3237093 | 2401  | 12.2 (10.3, 14.2) | 3.5 (2.8, 4.2)  | 0.8 (0.6, 1.1) | 105 (87, 125)     | 383 (326, 441)    | 90 (68, 115)      | 33 (27, 39)       | 118 (101, 136)    | 28 (21, 35)       | 4.4 (3.6, 5.2)  | 16 (13.9, 18)     | 3.8 (2.7, 4.8)    |
| <b>Bhutan</b>  |         |       |                   |                 |                |                   |                   |                   |                   |                   |                   |                 |                   |                   |
| Age 25-69      | 334376  | 157   | 3.2 (2.9, 3.4)    | 4.2 (3.9, 4.6)  | 2.6 (2.2, 3.1) | 2 (2, 3)          | 27 (19, 35)       | 36 (26, 48)       | 7 (5, 10)         | 80 (57, 106)      | 108 (77, 143)     | 1.5 (1.1, 1.9)  | 17.1 (14.7, 19.5) | 23 (19.4, 26.9)   |
| Age 70+        | 21579   | 183   | 3.2 (2.8, 3.6)    | 4.1 (3.6, 4.6)  | 2.4 (1.8, 3.1) | 2 (1, 3)          | 21 (14, 29)       | 27 (17, 39)       | 81 (47, 129)      | 995 (667, 1342)   | 1236 (793, 1786)  | 1 (0.6, 1.4)    | 11.7 (9.2, 14.3)  | 14.6 (10.4, 18.7) |
| Female         | 159454  | 133   | 3.2 (2.5, 3.9)    | 4.3 (3.2, 5.4)  | 2.6 (2, 3.3)   | 2 (1, 2)          | 18 (13, 24)       | 24 (16, 33)       | 10 (6, 14)        | 114 (79, 151)     | 150 (100, 208)    | 1.2 (0.8, 1.6)  | 13.7 (11.3, 16.2) | 18 (13.7, 22.2)   |
| Male           | 196501  | 206   | 3.1 (2.5, 3.8)    | 4.2 (3.1, 5.3)  | 2.6 (1.9, 3.2) | 3 (2, 4)          | 30 (21, 40)       | 39 (26, 53)       | 13 (8, 19)        | 153 (107, 203)    | 197 (133, 272)    | 1.2 (0.8, 1.7)  | 14.6 (11.8, 17.2) | 18.8 (14.4, 23.7) |
| All            | 355955  | 339   | 3.2 (2.7, 3.7)    | 4.3 (3.5, 5)    | 2.6 (2.2, 3.1) | 4 (3, 6)          | 48 (37, 60)       | 63 (48, 78)       | 12 (8, 16)        | 135 (104, 168)    | 176 (135, 220)    | 1.2 (0.9, 1.5)  | 14.2 (12.3, 16)   | 18.5 (15.4, 21.7) |
| <b>Bolivia</b> |         |       |                   |                 |                |                   |                   |                   |                   |                   |                   |                 |                   |                   |
| Age 25-69      | 4070365 | 1902  | 3.2 (2.9, 3.5)    | 4.2 (3.8, 4.5)  | 1 (0.9, 1)     | 29 (21, 40)       | 330 (269, 394)    | 119 (98, 141)     | 7 (5, 10)         | 81 (66, 97)       | 29 (24, 35)       | 1.5 (1.1, 1.9)  | 17.4 (15.3, 19.6) | 6.3 (5.6, 6.9)    |
| Age 70+        | 284268  | 2767  | 3.1 (2.7, 3.6)    | 4.1 (3.5, 4.6)  | 0.9 (0.8, 1)   | 26 (16, 40)       | 324 (238, 418)    | 102 (77, 130)     | 92 (57, 141)      | 1141 (836, 1471)  | 360 (270, 457)    | 0.9 (0.5, 1.4)  | 11.7 (9.1, 14.3)  | 3.7 (2.9, 4.4)    |

|                               |           |        |                   |                   |                |                   |                      |                      |                 |                   |                 |                |                   |                   |
|-------------------------------|-----------|--------|-------------------|-------------------|----------------|-------------------|----------------------|----------------------|-----------------|-------------------|-----------------|----------------|-------------------|-------------------|
| Female                        | 2240771   | 2510   | 3.2 (2.4, 3.9)    | 4.2 (3.1, 5.3)    | 1 (0.6, 1.4)   | 29 (19, 42)       | 342 (261, 437)       | 117 (92, 145)        | 13 (8, 19)      | 153 (116, 195)    | 52 (41, 65)     | 1.1 (0.8, 1.5) | 13.6 (11.2, 16)   | 4.6 (3.9, 5.3)    |
| Male                          | 2113862   | 2143   | 3.1 (2.4, 3.8)    | 4.1 (3, 5.2)      | 1 (0.6, 1.4)   | 26 (18, 38)       | 313 (244, 385)       | 104 (84, 128)        | 12 (9, 18)      | 148 (115, 182)    | 49 (40, 60)     | 1.2 (0.8, 1.7) | 14.6 (12, 17.4)   | 4.9 (4.1, 5.6)    |
| All                           | 4354633   | 4675   | 3.2 (2.6, 3.7)    | 4.2 (3.4, 5)      | 1 (0.7, 1.3)   | 55 (42, 72)       | 655 (546, 778)       | 221 (189, 258)       | 13 (10, 16)     | 150 (125, 179)    | 51 (43, 59)     | 1.2 (0.9, 1.5) | 14 (12.4, 15.6)   | 4.7 (4.3, 5.2)    |
| <b>Bosnia and Herzegovina</b> |           |        |                   |                   |                |                   |                      |                      |                 |                   |                 |                |                   |                   |
| Age 25-69                     | 2295709   | 2306   | 12.9 (12, 13.9)   | 7.1 (6.6, 7.6)    | 0.9 (0.9, 1)   | 147 (109, 188)    | 251 (196, 309)       | 121 (99, 144)        | 64 (47, 82)     | 109 (85, 134)     | 53 (43, 63)     | 6.4 (5.2, 7.5) | 10.9 (9.3, 12.5)  | 5.3 (4.6, 5.9)    |
| Age 70+                       | 380882    | 6403   | 12.9 (11.3, 14.6) | 6.8 (5.9, 7.7)    | 0.9 (0.8, 1)   | 296 (203, 407)    | 502 (367, 650)       | 212 (165, 266)       | 778 (534, 1068) | 1317 (964, 1707)  | 558 (433, 697)  | 4.6 (3.1, 6.2) | 7.8 (5.6, 10)     | 3.3 (2.6, 4.1)    |
| Female                        | 1425658   | 4422   | 13.1 (10.2, 15.9) | 7.1 (5.4, 8.9)    | 0.9 (0.6, 1.3) | 224 (145, 328)    | 356 (248, 494)       | 161 (121, 205)       | 157 (102, 230)  | 250 (174, 347)    | 113 (85, 144)   | 5 (3.9, 6.2)   | 8.1 (6.5, 9.7)    | 3.7 (3.1, 4.2)    |
| Male                          | 1250933   | 4292   | 12.8 (10, 15.6)   | 7 (5.2, 8.7)      | 0.9 (0.5, 1.3) | 219 (154, 291)    | 396 (302, 501)       | 172 (138, 210)       | 175 (123, 232)  | 317 (241, 401)    | 138 (110, 168)  | 5.1 (3.9, 6.3) | 9.2 (7.5, 11)     | 4 (3.4, 4.6)      |
| All                           | 2676591   | 8692   | 12.9 (10.9, 14.9) | 7.1 (5.8, 8.3)    | 0.9 (0.7, 1.2) | 443 (342, 563)    | 753 (605, 909)       | 333 (281, 392)       | 165 (128, 210)  | 281 (226, 340)    | 125 (105, 147)  | 5.1 (4.2, 5.9) | 8.7 (7.5, 10)     | 3.8 (3.4, 4.2)    |
| <b>Botswana</b>               |           |        |                   |                   |                |                   |                      |                      |                 |                   |                 |                |                   |                   |
| Age 25-69                     | 863179    | 201    | 9.4 (8.6, 10.2)   | 5.1 (4.7, 5.5)    | 0.7 (0.5, 0.8) | 4 (3, 5)          | 32 (24, 40)          | 6 (4, 9)             | 4 (3, 6)        | 37 (28, 46)       | 7 (5, 10)       | 1.8 (1.2, 2.3) | 15.8 (13.5, 18)   | 3.1 (2, 4.2)      |
| Age 70+                       | 46633     | 177    | 9.4 (8, 10.7)     | 5 (4.3, 5.7)      | 0.6 (0.4, 0.8) | 2 (1, 3)          | 19 (12, 26)          | 3 (1, 5)             | 41 (23, 69)     | 400 (267, 555)    | 65 (28, 113)    | 1.1 (0.6, 1.6) | 10.5 (8.1, 13)    | 1.7 (0.7, 2.7)    |
| Female                        | 450614    | 152    | 9.5 (7.4, 11.5)   | 5.2 (3.9, 6.5)    | 0.7 (0.3, 1)   | 2 (1, 3)          | 19 (13, 26)          | 3 (2, 6)             | 5 (3, 7)        | 42 (29, 58)       | 8 (4, 13)       | 1.4 (0.8, 1.9) | 12.4 (9.8, 14.9)  | 2.3 (1.2, 3.2)    |
| Male                          | 459198    | 226    | 9.4 (7.3, 11.4)   | 5.1 (3.8, 6.4)    | 0.7 (0.3, 1)   | 3 (2, 5)          | 32 (24, 40)          | 6 (3, 9)             | 7 (5, 11)       | 69 (51, 88)       | 12 (7, 19)      | 1.5 (0.9, 2.1) | 14 (11.2, 16.9)   | 2.5 (1.3, 3.7)    |
| All                           | 909812    | 379    | 9.4 (7.9, 10.9)   | 5.1 (4.2, 6)      | 0.7 (0.4, 0.9) | 5 (4, 7)          | 50 (41, 62)          | 9 (6, 13)            | 6 (4, 8)        | 55 (45, 68)       | 10 (7, 14)      | 1.4 (1, 1.9)   | 13.3 (11.4, 15.1) | 2.4 (1.6, 3.3)    |
| <b>Brazil</b>                 |           |        |                   |                   |                |                   |                      |                      |                 |                   |                 |                |                   |                   |
| Age 25-69                     | 102809126 | 64799  | 8.9 (8.8, 9)      | 7 (6.9, 7.1)      | 1.8 (1.8, 1.9) | 1272 (1059, 1485) | 7479 (6370, 8581)    | 9709 (8724, 10826)   | 12 (10, 14)     | 73 (62, 83)       | 94 (85, 105)    | 2 (1.7, 2.2)   | 11.5 (10.2, 13)   | 15 (13.8, 16.2)   |
| Age 70+                       | 8986245   | 96311  | 8.9 (8.7, 9.1)    | 6.7 (6.6, 6.9)    | 1.7 (1.6, 1.8) | 1178 (893, 1489)  | 7655 (5881, 9533)    | 8867 (7439, 10485)   | 131 (99, 166)   | 852 (654, 1061)   | 987 (828, 1167) | 1.2 (0.9, 1.5) | 7.9 (6.3, 9.7)    | 9.2 (8, 10.5)     |
| Female                        | 58109768  | 73531  | 9 (7, 11)         | 7 (5.3, 8.8)      | 1.8 (1.3, 2.4) | 1063 (824, 1337)  | 6505 (5089, 8091)    | 8115 (6862, 9415)    | 18 (14, 23)     | 112 (88, 139)     | 140 (118, 162)  | 1.4 (1.2, 1.7) | 8.8 (7.3, 10.3)   | 11 (9.8, 12.2)    |
| Male                          | 53685603  | 87475  | 8.8 (6.9, 10.8)   | 6.9 (5.2, 8.6)    | 1.8 (1.3, 2.3) | 1386 (1119, 1665) | 8630 (6997, 10243)   | 10461 (9190, 11793)  | 26 (21, 31)     | 161 (130, 191)    | 195 (171, 220)  | 1.6 (1.3, 1.9) | 9.9 (8.2, 11.5)   | 12 (10.7, 13.3)   |
| All                           | 111795371 | 161306 | 8.9 (7.5, 10.3)   | 7 (5.7, 8.2)      | 1.8 (1.4, 2.2) | 2449 (2081, 2793) | 15134 (12926, 17143) | 18576 (16786, 20442) | 22 (19, 25)     | 135 (116, 153)    | 166 (150, 183)  | 1.5 (1.3, 1.7) | 9.4 (8.3, 10.6)   | 11.5 (10.7, 12.4) |
| <b>Brunei</b>                 |           |        |                   |                   |                |                   |                      |                      |                 |                   |                 |                |                   |                   |
| Age 25-69                     | 218820    | 103    | 12.1 (11.1, 13.1) | 2.9 (2.6, 3.1)    | 1.1 (0.9, 1.3) | 5 (4, 6)          | 21 (18, 25)          | 8 (6, 11)            | 23 (18, 28)     | 97 (81, 113)      | 38 (28, 49)     | 4.9 (4, 5.7)   | 20.6 (17.9, 23.4) | 8 (6.1, 9.9)      |
| Age 70+                       | 9255      | 115    | 12.1 (10.5, 13.7) | 2.8 (2.4, 3.1)    | 1 (0.8, 1.3)   | 4 (3, 5)          | 15 (11, 19)          | 5 (3, 7)             | 397 (275, 528)  | 1627 (1224, 2057) | 550 (320, 792)  | 3.2 (2.4, 4.1) | 13.1 (10.5, 15.8) | 4.4 (2.7, 6.2)    |
| Female                        | 114772    | 84     | 12.3 (9.6, 15)    | 2.9 (2.1, 3.7)    | 1.1 (0.7, 1.5) | 3 (3, 5)          | 13 (10, 16)          | 5 (3, 7)             | 30 (22, 40)     | 113 (87, 141)     | 41 (27, 58)     | 4.1 (3.1, 5)   | 15.3 (12.5, 18.1) | 5.6 (3.8, 7.5)    |
| Male                          | 113303    | 133    | 12 (9.3, 14.6)    | 2.8 (2, 3.6)      | 1.1 (0.7, 1.5) | 5 (4, 6)          | 23 (19, 27)          | 9 (6, 11)            | 47 (37, 57)     | 206 (171, 241)    | 76 (53, 101)    | 4 (3.1, 4.8)   | 17.6 (14.9, 20.4) | 6.5 (4.4, 8.5)    |
| All                           | 228075    | 217    | 12.1 (10.3, 14)   | 2.9 (2.3, 3.4)    | 1.1 (0.8, 1.4) | 9 (7, 10)         | 36 (31, 41)          | 13 (10, 17)          | 38 (32, 45)     | 159 (137, 181)    | 58 (44, 72)     | 4 (3.4, 4.7)   | 16.7 (14.6, 18.7) | 6.1 (4.8, 7.5)    |
| <b>Bulgaria</b>               |           |        |                   |                   |                |                   |                      |                      |                 |                   |                 |                |                   |                   |
| Age 25-69                     | 4676969   | 7661   | 11.7 (11.3, 12.2) | 12.6 (12.1, 13)   | 1 (0.9, 1)     | 239 (181, 303)    | 208 (154, 266)       | 440 (378, 504)       | 51 (39, 65)     | 44 (33, 57)       | 94 (81, 108)    | 3.1 (2.6, 3.7) | 2.7 (2.2, 3.2)    | 5.7 (5.2, 6.3)    |
| Age 70+                       | 931801    | 24927  | 11.7 (11, 12.5)   | 12.1 (11.3, 12.9) | 0.9 (0.8, 1)   | 509 (356, 714)    | 494 (343, 697)       | 867 (701, 1046)      | 547 (382, 767)  | 530 (368, 748)    | 931 (753, 1122) | 2 (1.4, 2.7)   | 2 (1.4, 2.5)      | 3.5 (2.9, 4.1)    |
| Female                        | 2954066   | 16437  | 11.8 (9.2, 14.4)  | 12.6 (9.7, 15.6)  | 1 (0.6, 1.4)   | 350 (233, 510)    | 322 (210, 479)       | 625 (490, 782)       | 118 (79, 173)   | 109 (71, 162)     | 212 (166, 265)  | 2.1 (1.6, 2.6) | 2 (1.5, 2.4)      | 3.8 (3.3, 4.3)    |
| Male                          | 2654704   | 16147  | 11.6 (9.1, 14.2)  | 12.4 (9.4, 15.3)  | 1 (0.6, 1.3)   | 399 (291, 525)    | 380 (274, 505)       | 683 (578, 800)       | 150 (110, 198)  | 143 (103, 190)    | 257 (218, 301)  | 2.5 (1.9, 3)   | 2.4 (1.8, 2.9)    | 4.2 (3.6, 4.8)    |
| All                           | 5608770   | 32581  | 11.7 (9.9, 13.6)  | 12.5 (10.4, 14.6) | 1 (0.7, 1.2)   | 749 (579, 972)    | 701 (539, 918)       | 1308 (1132, 1493)    | 133 (103, 173)  | 125 (96, 164)     | 233 (202, 266)  | 2.3 (1.9, 2.7) | 2.2 (1.8, 2.5)    | 4 (3.6, 4.4)      |
| <b>Burkina Faso</b>           |           |        |                   |                   |                |                   |                      |                      |                 |                   |                 |                |                   |                   |
| Age 25-69                     | 5486988   | 2068   | 8.8 (8, 9.5)      | 3.2 (2.8, 3.5)    | 0.8 (0.7, 1)   | 26 (19, 35)       | 392 (321, 470)       | 91 (61, 121)         | 5 (3, 6)        | 71 (58, 86)       | 17 (11, 22)     | 1.3 (0.9, 1.6) | 19 (16.6, 21.4)   | 4.4 (3.1, 5.7)    |
| Age 70+                       | 192118    | 1380   | 8.8 (7.4, 10.2)   | 3.1 (2.5, 3.6)    | 0.8 (0.5, 1)   | 12 (7, 18)        | 189 (139, 246)       | 39 (20, 62)          | 60 (36, 95)     | 983 (724, 1278)   | 204 (105, 324)  | 0.8 (0.4, 1.3) | 13.7 (10.4, 17)   | 2.8 (1.4, 4.4)    |
| Female                        | 2990339   | 1794   | 8.9 (7, 10.9)     | 3.2 (2.3, 4.1)    | 0.8 (0.5, 1.2) | 19 (13, 26)       | 291 (224, 365)       | 67 (42, 98)          | 6 (4, 9)        | 97 (75, 122)      | 23 (14, 33)     | 1 (0.7, 1.4)   | 16.2 (13.3, 19.3) | 3.7 (2.1, 5.3)    |
| Male                          | 2688767   | 1657   | 8.7 (6.8, 10.6)   | 3.1 (2.2, 4)      | 0.8 (0.5, 1.2) | 19 (12, 28)       | 290 (231, 346)       | 63 (40, 91)          | 7 (5, 10)       | 108 (86, 129)     | 24 (15, 34)     | 1.1 (0.7, 1.6) | 17.5 (14.4, 20.7) | 3.8 (2, 5.5)      |

| Country                         | Year | Population | Life Expectancy | Infant Mortality  | Under-5 Mortality | Maternal Mortality | Stillbirths      | Neonatal Mortality | Adolescent Fertility | Contraceptive Prevalence | Unmet Need        | Gender Inequality | SDG Target 3.6  |                   |                   |
|---------------------------------|------|------------|-----------------|-------------------|-------------------|--------------------|------------------|--------------------|----------------------|--------------------------|-------------------|-------------------|-----------------|-------------------|-------------------|
| All                             | 2019 | 5679106    | 3463            | 8.8 (7.4, 10.1)   | 3.2 (2.5, 3.8)    | 0.8 (0.6, 1.1)     | 38 (29, 49)      | 581 (491, 675)     | 131 (96, 170)        | 7 (5, 9)                 | 102 (86, 119)     | 23 (17, 30)       | 1.1 (0.8, 1.4)  | 16.8 (14.7, 18.9) | 3.8 (2.6, 4.9)    |
| <b>Burundi</b>                  |      |            |                 |                   |                   |                    |                  |                    |                      |                          |                   |                   |                 |                   |                   |
| Age 25-69                       | 2019 | 3166585    | 1595            | 8.7 (8.1, 9.4)    | 3.2 (2.8, 3.5)    | 0.5 (0.4, 0.7)     | 21 (14, 30)      | 316 (236, 401)     | 32 (20, 48)          | 7 (4, 9)                 | 100 (74, 127)     | 10 (6, 15)        | 1.3 (0.9, 1.8)  | 19.8 (17.2, 22.2) | 2 (1.3, 2.8)      |
| Age 70+                         | 2019 | 139512     | 1071            | 8.7 (7.6, 9.7)    | 3.1 (2.5, 3.6)    | 0.5 (0.3, 0.7)     | 9 (5, 15)        | 143 (98, 190)      | 12 (5, 21)           | 64 (37, 106)             | 1024 (705, 1364)  | 87 (36, 153)      | 0.8 (0.4, 1.2)  | 13.3 (10.2, 16.4) | 1.1 (0.4, 1.9)    |
| Female                          | 2019 | 1729870    | 1409            | 8.8 (6.9, 10.8)   | 3.2 (2.3, 4.1)    | 0.6 (0.2, 0.9)     | 15 (10, 23)      | 228 (161, 296)     | 22 (12, 35)          | 9 (6, 13)                | 132 (93, 171)     | 13 (7, 20)        | 1.1 (0.6, 1.6)  | 16.2 (13.3, 19)   | 1.6 (0.8, 2.4)    |
| Male                            | 2019 | 1576227    | 1283            | 8.6 (6.7, 10.5)   | 3.1 (2.3, 4)      | 0.5 (0.2, 0.8)     | 15 (10, 22)      | 231 (167, 301)     | 22 (12, 35)          | 10 (6, 14)               | 146 (106, 191)    | 14 (8, 22)        | 1.2 (0.7, 1.7)  | 18 (14.5, 21.4)   | 1.7 (0.8, 2.6)    |
| All                             | 2019 | 3306097    | 2665            | 8.7 (7.4, 10.1)   | 3.2 (2.6, 3.8)    | 0.5 (0.3, 0.8)     | 30 (22, 40)      | 458 (362, 559)     | 44 (30, 62)          | 9 (7, 12)                | 139 (110, 169)    | 13 (9, 19)        | 1.1 (0.8, 1.5)  | 17.2 (15, 19.4)   | 1.7 (1.1, 2.3)    |
| <b>Cambodia</b>                 |      |            |                 |                   |                   |                    |                  |                    |                      |                          |                   |                   |                 |                   |                   |
| Age 25-69                       | 2019 | 6182920    | 6229            | 14.4 (13.2, 15.5) | 3 (2.7, 3.2)      | 0.9 (0.7, 1)       | 605 (492, 727)   | 1230 (1020, 1458)  | 319 (232, 422)       | 98 (80, 118)             | 199 (165, 236)    | 52 (38, 68)       | 9.7 (8.3, 11.1) | 19.7 (17.4, 22.1) | 5.1 (3.9, 6.4)    |
| Age 70+                         | 2019 | 293781     | 4587            | 14.3 (12.3, 16.4) | 2.9 (2.5, 3.3)    | 0.8 (0.6, 1)       | 310 (235, 391)   | 620 (476, 766)     | 141 (84, 211)        | 1056 (800, 1332)         | 2109 (1619, 2608) | 481 (287, 717)    | 6.7 (5, 8.4)    | 13.5 (10.4, 16.5) | 3.1 (1.7, 4.5)    |
| Female                          | 2019 | 3460154    | 5433            | 14.6 (11.4, 17.8) | 3 (2.2, 3.9)      | 0.9 (0.5, 1.3)     | 457 (356, 563)   | 869 (685, 1054)    | 221 (147, 308)       | 132 (103, 163)           | 251 (198, 305)    | 64 (42, 89)       | 8.4 (6.9, 10)   | 16 (13.3, 18.6)   | 4.1 (2.6, 5.7)    |
| Male                            | 2019 | 3016547    | 5410            | 14.1 (11, 17.1)   | 3 (2.1, 3.8)      | 0.9 (0.5, 1.2)     | 459 (365, 565)   | 981 (798, 1182)    | 239 (167, 330)       | 152 (121, 187)           | 325 (265, 392)    | 79 (55, 110)      | 8.5 (6.7, 10.2) | 18.1 (15.1, 21.2) | 4.4 (2.9, 6)      |
| All                             | 2019 | 6476701    | 10836           | 14.3 (12.1, 16.6) | 3 (2.4, 3.6)      | 0.9 (0.6, 1.1)     | 915 (773, 1054)  | 1850 (1580, 2113)  | 460 (349, 582)       | 141 (119, 163)           | 286 (244, 326)    | 71 (54, 90)       | 8.4 (7.3, 9.6)  | 17.1 (15, 19.1)   | 4.3 (3.2, 5.3)    |
| <b>Cameroon</b>                 |      |            |                 |                   |                   |                    |                  |                    |                      |                          |                   |                   |                 |                   |                   |
| Age 25-69                       | 2019 | 7183860    | 3270            | 12.6 (11.6, 13.6) | 3.3 (3, 3.6)      | 0.9 (0.8, 0.9)     | 192 (154, 234)   | 625 (511, 744)     | 166 (133, 196)       | 27 (21, 33)              | 87 (71, 104)      | 23 (19, 27)       | 5.9 (4.9, 6.8)  | 19.1 (16.5, 21.6) | 5.1 (4.4, 5.8)    |
| Age 70+                         | 2019 | 405384     | 2980            | 12.4 (10.9, 14.1) | 3.2 (2.8, 3.6)    | 0.8 (0.7, 0.9)     | 120 (84, 161)    | 391 (290, 499)     | 91 (68, 118)         | 296 (208, 397)           | 964 (716, 1230)   | 224 (167, 292)    | 4 (2.9, 5)      | 13.1 (10, 16.1)   | 3 (2.3, 3.8)      |
| Female                          | 2019 | 3847707    | 2966            | 12.7 (10, 15.5)   | 3.3 (2.4, 4.3)    | 0.9 (0.5, 1.3)     | 149 (111, 192)   | 461 (357, 574)     | 119 (91, 148)        | 39 (29, 50)              | 120 (93, 149)     | 31 (24, 38)       | 5 (3.9, 6.2)    | 15.5 (12.8, 18.1) | 4 (3.2, 4.8)      |
| Male                            | 2019 | 3741537    | 3281            | 12.5 (9.7, 15.2)  | 3.3 (2.4, 4.1)    | 0.9 (0.5, 1.2)     | 163 (127, 205)   | 555 (444, 678)     | 138 (110, 169)       | 44 (34, 55)              | 148 (119, 181)    | 37 (29, 45)       | 5 (3.8, 6.1)    | 16.9 (14, 20)     | 4.2 (3.4, 5)      |
| All                             | 2019 | 7589244    | 6247            | 12.6 (10.6, 14.5) | 3.3 (2.7, 3.9)    | 0.9 (0.6, 1.1)     | 313 (259, 370)   | 1015 (855, 1176)   | 257 (217, 294)       | 41 (34, 49)              | 134 (113, 155)    | 34 (29, 39)       | 5 (4.2, 5.8)    | 16.3 (14.3, 18.2) | 4.1 (3.5, 4.7)    |
| <b>Canada</b>                   |      |            |                 |                   |                   |                    |                  |                    |                      |                          |                   |                   |                 |                   |                   |
| Age 25-69                       | 2019 | 20127331   | 10624           | 10.9 (10.7, 11.1) | 4.2 (4.1, 4.3)    | 4 (3.9, 4.2)       | 239 (191, 289)   | 1730 (1391, 2052)  | 3614 (3154, 4095)    | 12 (9, 14)               | 86 (69, 102)      | 180 (157, 203)    | 2.3 (1.9, 2.6)  | 16.3 (14.4, 18)   | 34.1 (31.7, 36.3) |
| Age 70+                         | 2019 | 3347053    | 45878           | 10.9 (10.6, 11.2) | 4.1 (3.9, 4.2)    | 3.8 (3.5, 4)       | 799 (542, 1079)  | 5157 (3661, 6619)  | 10287 (8327, 12435)  | 239 (162, 322)           | 1541 (1094, 1978) | 3074 (2488, 3715) | 1.7 (1.3, 2.2)  | 11.2 (9, 13.5)    | 22.4 (19.4, 25.3) |
| Female                          | 2019 | 11991582   | 27643           | 11 (8.6, 13.5)    | 4.3 (3.1, 5.4)    | 4 (3.1, 4.9)       | 536 (327, 800)   | 3183 (2031, 4452)  | 6500 (4856, 8408)    | 45 (27, 67)              | 265 (169, 371)    | 542 (405, 701)    | 2 (1.6, 2.3)    | 11.5 (9.9, 13.1)  | 23.6 (21.4, 25.6) |
| Male                            | 2019 | 11482802   | 28911           | 10.8 (8.4, 13.1)  | 4.2 (3.1, 5.3)    | 3.9 (3.1, 4.8)     | 502 (354, 646)   | 3704 (2735, 4600)  | 7401 (6255, 8725)    | 44 (31, 56)              | 323 (238, 401)    | 645 (545, 760)    | 1.7 (1.4, 2.1)  | 12.8 (10.9, 14.7) | 25.6 (23.2, 27.9) |
| All                             | 2019 | 23474384   | 56450           | 10.9 (9.2, 12.6)  | 4.2 (3.4, 5)      | 4 (3.4, 4.6)       | 1039 (772, 1328) | 6887 (5358, 8426)  | 13901 (11905, 16159) | 44 (33, 57)              | 293 (228, 359)    | 592 (507, 688)    | 1.8 (1.6, 2.1)  | 12.2 (10.9, 13.4) | 24.7 (23.1, 26.2) |
| <b>Cape Verde</b>               |      |            |                 |                   |                   |                    |                  |                    |                      |                          |                   |                   |                 |                   |                   |
| Age 25-69                       | 2019 | 201746     | 57              | 9.3 (8.5, 10)     | 4.7 (4.3, 5.1)    | 1 (0.8, 1.1)       | 1 (1, 1)         | 10 (8, 12)         | 4 (3, 5)             | 5 (3, 7)                 | 48 (38, 59)       | 18 (13, 23)       | 1.7 (1.3, 2.2)  | 17 (14.8, 19.3)   | 6.3 (4.7, 7.9)    |
| Age 70+                         | 2019 | 22417      | 120             | 9.2 (8, 10.5)     | 4.5 (3.9, 5.2)    | 0.9 (0.6, 1.1)     | 1 (1, 2)         | 13 (10, 17)        | 4 (2, 7)             | 55 (32, 85)              | 598 (430, 769)    | 188 (109, 290)    | 1 (0.6, 1.5)    | 11.2 (8.8, 13.7)  | 3.5 (2.1, 4.9)    |
| Female                          | 2019 | 115952     | 68              | 9.4 (7.3, 11.4)   | 4.7 (3.5, 5.9)    | 1 (0.6, 1.4)       | 1 (0, 1)         | 8 (6, 11)          | 3 (2, 5)             | 7 (4, 11)                | 71 (51, 96)       | 25 (14, 39)       | 1.2 (0.8, 1.6)  | 12.1 (10, 14.3)   | 4.2 (2.8, 5.6)    |
| Male                            | 2019 | 108211     | 108             | 9.1 (7.1, 11.1)   | 4.6 (3.4, 5.8)    | 0.9 (0.6, 1.3)     | 1 (1, 2)         | 15 (12, 19)        | 5 (3, 7)             | 13 (9, 19)               | 137 (107, 171)    | 45 (30, 63)       | 1.3 (0.8, 1.8)  | 13.7 (11, 16.3)   | 4.5 (2.9, 6.2)    |
| All                             | 2019 | 224163     | 177             | 9.3 (7.8, 10.7)   | 4.7 (3.8, 5.5)    | 1 (0.7, 1.2)       | 2 (2, 3)         | 23 (19, 28)        | 8 (6, 10)            | 10 (7, 13)               | 103 (83, 123)     | 35 (26, 46)       | 1.2 (0.9, 1.6)  | 13.1 (11.4, 14.7) | 4.4 (3.4, 5.4)    |
| <b>Central African Republic</b> |      |            |                 |                   |                   |                    |                  |                    |                      |                          |                   |                   |                 |                   |                   |
| Age 25-69                       | 2019 | 1610806    | 1242            | 8.7 (8, 9.4)      | 8.5 (7.6, 9.4)    | 0.8 (0.7, 1)       | 33 (21, 50)      | 106 (77, 142)      | 54 (37, 75)          | 20 (13, 31)              | 66 (48, 88)       | 33 (23, 46)       | 2.6 (1.8, 3.6)  | 8.5 (6.5, 10.3)   | 4.3 (3.2, 5.6)    |
| Age 70+                         | 2019 | 103748     | 1187            | 8.6 (7.5, 9.8)    | 8.2 (6.9, 9.6)    | 0.8 (0.5, 1)       | 21 (11, 35)      | 73 (48, 102)       | 32 (18, 50)          | 201 (107, 336)           | 704 (467, 979)    | 312 (175, 479)    | 1.7 (0.8, 2.7)  | 6.2 (4, 8.3)      | 2.7 (1.4, 4)      |
| Female                          | 2019 | 881413     | 1024            | 8.8 (6.9, 10.7)   | 8.6 (6.5, 10.7)   | 0.8 (0.5, 1.2)     | 21 (12, 33)      | 68 (46, 96)        | 35 (21, 51)          | 24 (14, 38)              | 77 (52, 109)      | 39 (24, 58)       | 2 (1.1, 3)      | 6.6 (4.7, 8.6)    | 3.4 (2.2, 4.7)    |
| Male                            | 2019 | 833141     | 1412            | 8.6 (6.7, 10.5)   | 8.4 (6.3, 10.4)   | 0.8 (0.4, 1.2)     | 33 (20, 51)      | 111 (79, 149)      | 51 (34, 72)          | 39 (24, 61)              | 133 (94, 179)     | 62 (41, 87)       | 2.3 (1.2, 3.5)  | 7.9 (5.5, 10.2)   | 3.6 (2.3, 5)      |
| All                             | 2019 | 1714554    | 2437            | 8.7 (7.3, 10)     | 8.5 (7, 9.9)      | 0.8 (0.6, 1.1)     | 54 (38, 74)      | 179 (140, 222)     | 86 (62, 112)         | 31 (22, 43)              | 104 (82, 129)     | 50 (36, 65)       | 2.2 (1.5, 3)    | 7.3 (5.9, 8.9)    | 3.5 (2.6, 4.5)    |
| <b>Chad</b>                     |      |            |                 |                   |                   |                    |                  |                    |                      |                          |                   |                   |                 |                   |                   |

|                   |           |        |                   |                 |                |                      |                      |                      |                |                   |                |                   |                   |                   |
|-------------------|-----------|--------|-------------------|-----------------|----------------|----------------------|----------------------|----------------------|----------------|-------------------|----------------|-------------------|-------------------|-------------------|
| Age 25-69         | 3727425   | 1440   | 4.9 (4.4, 5.4)    | 5.4 (5, 5.9)    | 0.7 (0.6, 0.8) | 26 (19, 35)          | 211 (174, 257)       | 49 (32, 67)          | 7 (5, 9)       | 57 (47, 69)       | 13 (9, 18)     | 1.8 (1.3, 2.3)    | 14.7 (12.6, 16.7) | 3.4 (2.2, 4.5)    |
| Age 70+           | 182065    | 1087   | 4.9 (4, 5.8)      | 5.3 (4.5, 6)    | 0.6 (0.4, 0.9) | 13 (8, 19)           | 112 (84, 142)        | 22 (12, 35)          | 70 (44, 105)   | 618 (459, 782)    | 123 (64, 192)  | 1.2 (0.6, 1.7)    | 10.3 (7.7, 13.1)  | 2.1 (1, 3.2)      |
| Female            | 1998681   | 1268   | 5 (3.8, 6.1)      | 5.5 (4.1, 6.9)  | 0.7 (0.4, 1)   | 19 (13, 27)          | 156 (122, 195)       | 34 (20, 50)          | 9 (6, 13)      | 78 (61, 97)       | 17 (10, 25)    | 1.5 (0.9, 2.1)    | 12.3 (9.8, 14.5)  | 2.7 (1.6, 4)      |
| Male              | 1910809   | 1253   | 4.8 (3.8, 5.9)    | 5.3 (4, 6.7)    | 0.7 (0.4, 1)   | 20 (13, 28)          | 168 (131, 206)       | 37 (23, 52)          | 10 (7, 15)     | 88 (69, 108)      | 19 (12, 27)    | 1.6 (0.9, 2.2)    | 13.4 (10.5, 16.1) | 2.9 (1.5, 4.3)    |
| All               | 3909490   | 2526   | 4.9 (4.1, 5.7)    | 5.4 (4.4, 6.4)  | 0.7 (0.5, 0.9) | 38 (29, 49)          | 324 (274, 377)       | 71 (50, 93)          | 10 (8, 13)     | 83 (70, 96)       | 18 (13, 24)    | 1.5 (1.1, 1.9)    | 12.8 (11, 14.6)   | 2.8 (1.9, 3.8)    |
| <b>Chile</b>      |           |        |                   |                 |                |                      |                      |                      |                |                   |                |                   |                   |                   |
| Age 25-69         | 9012586   | 3209   | 8.8 (8.2, 9.5)    | 5.4 (5, 5.7)    | 1.1 (1, 1.1)   | 54 (39, 76)          | 466 (382, 560)       | 212 (181, 244)       | 6 (4, 8)       | 52 (42, 62)       | 23 (20, 27)    | 1.7 (1.3, 2.1)    | 14.5 (12.8, 16.2) | 6.6 (6, 7.2)      |
| Age 70+           | 1062056   | 7974   | 8.8 (7.8, 9.8)    | 5.2 (4.5, 5.8)  | 1 (0.9, 1)     | 86 (53, 134)         | 796 (587, 1032)      | 317 (249, 390)       | 81 (49, 126)   | 750 (553, 972)    | 298 (235, 368) | 1.1 (0.7, 1.5)    | 10 (7.8, 12.2)    | 4 (3.3, 4.6)      |
| Female            | 5210581   | 4918   | 8.9 (6.9, 10.8)   | 5.4 (4, 6.8)    | 1.1 (0.7, 1.5) | 58 (35, 97)          | 519 (363, 723)       | 219 (170, 282)       | 11 (7, 19)     | 100 (70, 139)     | 42 (33, 54)    | 1.2 (0.8, 1.5)    | 10.6 (8.8, 12.3)  | 4.4 (3.9, 5)      |
| Male              | 4864061   | 6267   | 8.8 (6.8, 10.7)   | 5.3 (3.9, 6.6)  | 1 (0.6, 1.4)   | 83 (55, 121)         | 743 (584, 921)       | 309 (258, 367)       | 17 (11, 25)    | 153 (120, 189)    | 63 (53, 75)    | 1.3 (0.9, 1.8)    | 11.9 (9.9, 13.9)  | 4.9 (4.2, 5.6)    |
| All               | 10074642  | 11188  | 8.8 (7.5, 10.2)   | 5.3 (4.4, 6.3)  | 1 (0.8, 1.3)   | 141 (103, 194)       | 1262 (1042, 1524)    | 528 (454, 609)       | 14 (10, 19)    | 125 (103, 151)    | 52 (45, 60)    | 1.3 (1, 1.6)      | 11.3 (9.8, 12.6)  | 4.7 (4.3, 5.1)    |
| <b>China</b>      |           |        |                   |                 |                |                      |                      |                      |                |                   |                |                   |                   |                   |
| Age 25-69         | 784218572 | 317221 | 7.4 (7.3, 7.6)    | 8.5 (8.4, 8.7)  | 1 (1, 1)       | 7181 (5835, 8739)    | 26283 (21699, 31587) | 19452 (16754, 22130) | 9 (7, 11)      | 34 (28, 40)       | 25 (21, 28)    | 2.3 (1.9, 2.6)    | 8.3 (7.2, 9.4)    | 6.1 (5.6, 6.7)    |
| Age 70+           | 70847048  | 629126 | 7.4 (7.2, 7.6)    | 8.2 (7.9, 8.4)  | 0.9 (0.9, 1)   | 9020 (6720, 11534)   | 37055 (28243, 46490) | 22903 (18827, 27370) | 127 (95, 163)  | 523 (399, 656)    | 323 (266, 386) | 1.4 (1.1, 1.8)    | 5.9 (4.6, 7.2)    | 3.7 (3.1, 4.2)    |
| Female            | 420652124 | 414896 | 7.5 (5.9, 9.2)    | 8.6 (6.5, 10.6) | 1 (0.6, 1.4)   | 6693 (4782, 8766)    | 25824 (18328, 33229) | 17790 (14294, 21860) | 16 (11, 21)    | 61 (44, 79)       | 42 (34, 52)    | 1.6 (1.3, 1.9)    | 6.2 (5.2, 7.3)    | 4.3 (3.8, 4.9)    |
| Male              | 434413496 | 530094 | 7.3 (5.7, 9)      | 8.4 (6.4, 10.5) | 1 (0.6, 1.4)   | 9509 (7569, 11467)   | 37513 (30100, 44948) | 24566 (20891, 28293) | 22 (17, 26)    | 86 (69, 103)      | 57 (48, 65)    | 1.8 (1.4, 2.2)    | 7.1 (5.8, 8.3)    | 4.6 (4, 5.2)      |
| All               | 855065620 | 945973 | 7.4 (6.3, 8.6)    | 8.5 (7, 9.9)    | 1 (0.7, 1.3)   | 16201 (13490, 19068) | 63338 (53023, 74086) | 42356 (37090, 47688) | 19 (16, 22)    | 74 (62, 87)       | 50 (43, 56)    | 1.7 (1.5, 2)      | 6.7 (5.9, 7.5)    | 4.5 (4.1, 4.9)    |
| <b>Colombia</b>   |           |        |                   |                 |                |                      |                      |                      |                |                   |                |                   |                   |                   |
| Age 25-69         | 22868237  | 10849  | 8.3 (8.1, 8.5)    | 6.3 (6.1, 6.4)  | 1.3 (1.2, 1.3) | 189 (153, 227)       | 1372 (1136, 1607)    | 952 (833, 1092)      | 8 (7, 10)      | 60 (50, 70)       | 42 (36, 48)    | 1.7 (1.5, 2)      | 12.6 (11.1, 14.2) | 8.8 (7.9, 9.6)    |
| Age 70+           | 1651747   | 23420  | 8.3 (8, 8.6)      | 6 (5.8, 6.2)    | 1.2 (1.1, 1.3) | 266 (194, 348)       | 2091 (1597, 2598)    | 1263 (1033, 1507)    | 161 (117, 211) | 1266 (967, 1573)  | 765 (626, 912) | 1.1 (0.9, 1.4)    | 8.9 (7, 10.9)     | 5.4 (4.5, 6.2)    |
| Female            | 12822471  | 15999  | 8.4 (6.6, 10.3)   | 6.3 (4.8, 7.9)  | 1.3 (0.9, 1.7) | 207 (153, 273)       | 1546 (1178, 1951)    | 1002 (808, 1211)     | 16 (12, 21)    | 121 (92, 152)     | 78 (63, 94)    | 1.3 (1, 1.6)      | 9.7 (7.9, 11.3)   | 6.2 (5.4, 7.1)    |
| Male              | 11697513  | 18299  | 8.2 (6.4, 10)     | 6.2 (4.6, 7.7)  | 1.3 (0.8, 1.7) | 248 (194, 307)       | 1917 (1532, 2286)    | 1214 (1041, 1402)    | 21 (17, 26)    | 164 (131, 195)    | 104 (89, 120)  | 1.4 (1.1, 1.7)    | 10.5 (8.8, 12.1)  | 6.6 (5.7, 7.5)    |
| All               | 24519984  | 34304  | 8.3 (7, 9.6)      | 6.2 (5.1, 7.3)  | 1.3 (1, 1.6)   | 455 (376, 548)       | 3463 (2907, 4028)    | 2215 (1954, 2509)    | 19 (15, 22)    | 141 (119, 164)    | 90 (80, 102)   | 1.3 (1.1, 1.5)    | 10.1 (8.9, 11.3)  | 6.5 (5.8, 7.1)    |
| <b>Comoros</b>    |           |        |                   |                 |                |                      |                      |                      |                |                   |                |                   |                   |                   |
| Age 25-69         | 276597    | 109    | 16.7 (15.2, 18.2) | 2.5 (2.2, 2.7)  | 1.3 (0.8, 1.7) | 16 (13, 19)          | 23 (19, 27)          | 11 (7, 15)           | 59 (48, 70)    | 83 (68, 99)       | 39 (26, 55)    | 14.9 (12.8, 17)   | 21 (18.4, 23.8)   | 10 (6.8, 13.2)    |
| Age 70+           | 11756     | 81     | 16.6 (14.3, 19)   | 2.4 (2, 2.7)    | 1.2 (0.5, 1.9) | 8 (6, 10)            | 12 (9, 14)           | 5 (2, 8)             | 696 (520, 873) | 986 (745, 1231)   | 418 (183, 689) | 10.1 (7.7, 12.5)  | 14.3 (11.1, 17.5) | 6 (2.7, 9.5)      |
| Female            | 145204    | 93     | 16.9 (13.2, 20.6) | 2.5 (1.8, 3.2)  | 1.3 (0.9, 1.7) | 12 (9, 15)           | 16 (13, 20)          | 8 (4, 12)            | 82 (63, 101)   | 111 (87, 138)     | 52 (29, 79)    | 12.8 (10.3, 15.2) | 17.4 (14.3, 20.4) | 8.2 (4.5, 12)     |
| Male              | 143149    | 97     | 16.5 (12.9, 20.1) | 2.4 (1.7, 3.1)  | 1.3 (0.8, 1.7) | 13 (10, 15)          | 18 (15, 22)          | 8 (5, 12)            | 88 (69, 107)   | 128 (102, 156)    | 58 (36, 84)    | 12.9 (10.6, 15.4) | 18.9 (15.4, 22.5) | 8.5 (4.6, 12.4)   |
| All               | 288353    | 190    | 16.7 (14.1, 19.2) | 2.5 (1.9, 3)    | 1.3 (1, 1.6)   | 24 (21, 28)          | 35 (29, 40)          | 16 (11, 21)          | 85 (71, 98)    | 120 (102, 138)    | 55 (38, 73)    | 12.8 (11.2, 14.5) | 18.2 (15.8, 20.4) | 8.3 (5.4, 11)     |
| <b>Congo</b>      |           |        |                   |                 |                |                      |                      |                      |                |                   |                |                   |                   |                   |
| Age 25-69         | 1529193   | 1165   | 14.2 (13, 15.2)   | 4.2 (3.9, 4.5)  | 0.8 (0.6, 0.9) | 109 (87, 133)        | 203 (165, 246)       | 50 (34, 70)          | 71 (57, 87)    | 133 (108, 161)    | 33 (22, 46)    | 9.3 (7.8, 10.7)   | 17.4 (15.2, 19.8) | 4.3 (3.1, 5.6)    |
| Age 70+           | 89383     | 1050   | 14.1 (12.2, 15.9) | 4.1 (3.5, 4.6)  | 0.7 (0.5, 1)   | 67 (50, 86)          | 125 (96, 157)        | 27 (15, 41)          | 750 (562, 962) | 1396 (1070, 1757) | 301 (169, 460) | 6.4 (4.7, 8.1)    | 11.9 (9.3, 14.7)  | 2.6 (1.3, 3.9)    |
| Female            | 815970    | 934    | 14.3 (11.2, 17.5) | 4.3 (3.1, 5.4)  | 0.8 (0.4, 1.2) | 73 (55, 93)          | 129 (99, 160)        | 31 (20, 45)          | 90 (68, 114)   | 158 (122, 196)    | 38 (24, 55)    | 7.8 (6.1, 9.4)    | 13.8 (11.2, 16.1) | 3.3 (2, 4.6)      |
| Male              | 802606    | 1286   | 14 (10.9, 17.1)   | 4.1 (3, 5.2)    | 0.8 (0.4, 1.1) | 102 (82, 127)        | 199 (161, 241)       | 46 (30, 64)          | 128 (102, 158) | 248 (201, 301)    | 58 (37, 79)    | 8 (6.3, 9.7)      | 15.5 (12.9, 18.2) | 3.6 (2.1, 5.2)    |
| All               | 1618576   | 2214   | 14.2 (12, 16.4)   | 4.2 (3.4, 5)    | 0.8 (0.5, 1.1) | 176 (149, 206)       | 328 (280, 380)       | 77 (56, 99)          | 109 (92, 127)  | 202 (173, 235)    | 48 (35, 61)    | 7.9 (6.7, 9.1)    | 14.8 (12.8, 16.7) | 3.5 (2.5, 4.5)    |
| <b>Costa Rica</b> |           |        |                   |                 |                |                      |                      |                      |                |                   |                |                   |                   |                   |
| Age 25-69         | 2414549   | 910    | 8.6 (7.9, 9.2)    | 6.2 (5.7, 6.6)  | 1.5 (1.4, 1.6) | 17 (12, 24)          | 118 (95, 141)        | 103 (90, 117)        | 7 (5, 10)      | 49 (39, 58)       | 43 (37, 48)    | 1.9 (1.4, 2.4)    | 13 (11.1, 14.7)   | 11.3 (10.2, 12.4) |
| Age 70+           | 201985    | 2229   | 8.6 (7.5, 9.6)    | 5.9 (5.2, 6.7)  | 1.4 (1.3, 1.5) | 27 (15, 44)          | 198 (142, 258)       | 151 (121, 183)       | 132 (76, 218)  | 980 (701, 1279)   | 747 (599, 905) | 1.2 (0.7, 1.7)    | 8.9 (6.9, 10.9)   | 6.8 (5.7, 7.9)    |

|                                         |          |       |                   |                 |                |                   |                   |                   |                  |                   |                   |                |                   |                 |
|-----------------------------------------|----------|-------|-------------------|-----------------|----------------|-------------------|-------------------|-------------------|------------------|-------------------|-------------------|----------------|-------------------|-----------------|
| Female                                  | 1300317  | 1351  | 8.7 (6.8, 10.6)   | 6.2 (4.7, 7.8)  | 1.5 (1, 2)     | 18 (10, 31)       | 128 (88, 173)     | 104 (82, 131)     | 14 (8, 24)       | 99 (67, 133)      | 80 (63, 101)      | 1.3 (0.9, 1.8) | 9.5 (7.6, 11.4)   | 7.7 (6.6, 8.6)  |
| Male                                    | 1316217  | 1784  | 8.5 (6.6, 10.4)   | 6.1 (4.5, 7.6)  | 1.5 (1, 1.9)   | 26 (17, 38)       | 187 (145, 234)    | 149 (127, 174)    | 20 (13, 29)      | 142 (110, 178)    | 114 (96, 132)     | 1.5 (0.9, 2)   | 10.5 (8.7, 12.5)  | 8.4 (7.3, 9.5)  |
| All                                     | 2616534  | 3135  | 8.6 (7.3, 9.9)    | 6.2 (5.1, 7.3)  | 1.5 (1.2, 1.8) | 44 (32, 62)       | 316 (254, 378)    | 254 (220, 289)    | 17 (12, 24)      | 121 (97, 144)     | 97 (84, 110)      | 1.4 (1, 1.8)   | 10.1 (8.7, 11.5)  | 8.1 (7.3, 8.8)  |
| <b>Croatia</b>                          |          |       |                   |                 |                |                   |                   |                   |                  |                   |                   |                |                   |                 |
| Age 25-69                               | 7228162  | 4282  | 14.8 (13.7, 15.9) | 8.9 (8.3, 9.6)  | 1.2 (1.2, 1.3) | 366 (293, 441)    | 930 (751, 1110)   | 212 (150, 285)    | 51 (41, 61)      | 129 (104, 154)    | 29 (21, 39)       | 8.6 (7.3, 9.8) | 21.7 (19.2, 24.3) | 4.9 (3.8, 6.2)  |
| Age 70+                                 | 426131   | 3216  | 14.9 (12.9, 16.7) | 8.7 (7.6, 9.8)  | 1.1 (1, 1.2)   | 192 (144, 246)    | 487 (372, 613)    | 97 (58, 143)      | 451 (337, 576)   | 1142 (872, 1438)  | 228 (135, 335)    | 6 (4.5, 7.4)   | 15.1 (11.8, 18.3) | 3 (1.5, 4.3)    |
| Female                                  | 3654272  | 2702  | 15 (11.7, 18.2)   | 9 (6.9, 11.2)   | 1.2 (0.8, 1.6) | 209 (160, 265)    | 489 (378, 609)    | 109 (71, 152)     | 57 (44, 72)      | 134 (103, 167)    | 30 (19, 42)       | 7.7 (6.1, 9.4) | 18.1 (15.1, 21)   | 4 (2.6, 5.4)    |
| Male                                    | 4000021  | 4782  | 14.6 (11.4, 17.8) | 8.7 (6.6, 10.8) | 1.2 (0.8, 1.6) | 349 (275, 427)    | 928 (742, 1116)   | 200 (136, 271)    | 87 (69, 107)     | 232 (186, 279)    | 50 (34, 68)       | 7.3 (5.8, 8.7) | 19.4 (16.1, 22.7) | 4.2 (2.8, 5.6)  |
| All                                     | 7654293  | 7483  | 14.8 (12.5, 17.1) | 8.9 (7.4, 10.4) | 1.2 (0.9, 1.5) | 558 (470, 646)    | 1417 (1202, 1638) | 309 (233, 387)    | 73 (61, 84)      | 185 (157, 214)    | 40 (31, 51)       | 7.5 (6.5, 8.5) | 18.9 (16.7, 21.2) | 4.1 (3, 5.1)    |
| <b>Cuba</b>                             |          |       |                   |                 |                |                   |                   |                   |                  |                   |                   |                |                   |                 |
| Age 25-69                               | 2650382  | 2360  | 6.6 (6.2, 7.1)    | 5.7 (5.3, 6.2)  | 0.5 (0.4, 0.6) | 175 (129, 230)    | 175 (129, 230)    | 190 (163, 220)    | 66 (49, 87)      | 66 (49, 87)       | 72 (62, 83)       | 7.4 (5.9, 8.8) | 7.4 (6.1, 8.7)    | 8.1 (7.3, 8.8)  |
| Age 70+                                 | 558455   | 11242 | 6.6 (5.9, 7.4)    | 5.5 (4.9, 6.2)  | 0.5 (0.3, 0.6) | 598 (389, 861)    | 598 (389, 861)    | 565 (456, 692)    | 1071 (697, 1543) | 1071 (697, 1543)  | 1011 (816, 1239)  | 5.3 (3.5, 7.2) | 5.3 (3.3, 7.2)    | 5 (4.1, 6)      |
| Female                                  | 1700505  | 7546  | 6.7 (5.2, 8.2)    | 5.7 (4.3, 7.2)  | 0.5 (0.2, 0.8) | 400 (221, 653)    | 400 (221, 653)    | 397 (297, 518)    | 235 (130, 384)   | 235 (130, 384)    | 234 (175, 305)    | 5.3 (4, 6.5)   | 5.3 (4.1, 6.6)    | 5.2 (4.6, 5.9)  |
| Male                                    | 1508332  | 6027  | 6.5 (5.1, 8)      | 5.7 (4.3, 7.2)  | 0.5 (0.2, 0.8) | 374 (264, 512)    | 374 (264, 512)    | 357 (294, 421)    | 248 (175, 340)   | 248 (175, 340)    | 237 (195, 279)    | 6.2 (4.7, 7.7) | 6.2 (4.8, 7.7)    | 5.9 (5.1, 6.7)  |
| All                                     | 3208837  | 13597 | 6.6 (5.6, 7.7)    | 5.7 (4.7, 6.7)  | 0.5 (0.3, 0.7) | 773 (557, 1039)   | 773 (557, 1039)   | 755 (641, 892)    | 241 (174, 324)   | 241 (174, 324)    | 235 (200, 278)    | 5.7 (4.8, 6.6) | 5.7 (4.7, 6.6)    | 5.5 (5.1, 6)    |
| <b>Cyprus</b>                           |          |       |                   |                 |                |                   |                   |                   |                  |                   |                   |                |                   |                 |
| Age 25-69                               | 6755645  | 5207  | 9.2 (8.6, 9.8)    | 6.4 (5.9, 6.9)  | 1.2 (1, 1.4)   | 92 (66, 124)      | 705 (584, 828)    | 75 (47, 112)      | 14 (10, 18)      | 104 (86, 123)     | 11 (7, 17)        | 1.8 (1.4, 2.2) | 13.5 (11.9, 15.2) | 1.4 (1, 1.9)    |
| Age 70+                                 | 948031   | 16469 | 9.2 (8, 10.3)     | 6.1 (5.3, 6.9)  | 1.1 (0.9, 1.4) | 186 (111, 284)    | 1553 (1119, 1994) | 133 (59, 240)     | 196 (117, 300)   | 1639 (1181, 2103) | 140 (62, 253)     | 1.1 (0.7, 1.6) | 9.4 (7.4, 11.5)   | 0.8 (0.4, 1.3)  |
| Female                                  | 3867663  | 10685 | 9.4 (7.3, 11.4)   | 6.4 (4.8, 8)    | 1.2 (0.8, 1.6) | 131 (76, 215)     | 1067 (751, 1441)  | 100 (42, 184)     | 34 (20, 56)      | 276 (194, 373)    | 26 (11, 48)       | 1.2 (0.9, 1.6) | 10 (8.4, 11.6)    | 0.9 (0.6, 1.3)  |
| Male                                    | 3836013  | 10949 | 9.1 (7.1, 11.1)   | 6.2 (4.7, 7.8)  | 1.2 (0.8, 1.6) | 147 (95, 219)     | 1191 (909, 1492)  | 108 (54, 180)     | 38 (25, 57)      | 310 (237, 389)    | 28 (14, 47)       | 1.3 (0.9, 1.8) | 10.9 (9.1, 12.8)  | 1 (0.5, 1.4)    |
| All                                     | 7703676  | 21667 | 9.2 (7.8, 10.7)   | 6.3 (5.2, 7.5)  | 1.2 (0.9, 1.5) | 278 (198, 385)    | 2258 (1792, 2715) | 208 (125, 317)    | 36 (26, 50)      | 293 (233, 352)    | 27 (16, 41)       | 1.3 (1, 1.6)   | 10.4 (9.1, 11.7)  | 1 (0.7, 1.2)    |
| <b>Czech Republic</b>                   |          |       |                   |                 |                |                   |                   |                   |                  |                   |                   |                |                   |                 |
| Age 25-69                               | 443547   | 275   | 16.9 (15.7, 18)   | 8.5 (7.9, 9.1)  | 1.4 (1.3, 1.4) | 5 (4, 8)          | 34 (27, 42)       | 22 (15, 30)       | 12 (8, 18)       | 77 (62, 95)       | 50 (35, 68)       | 2 (1.5, 2.5)   | 12.5 (10.8, 14.2) | 8.1 (6.4, 9.7)  |
| Age 70+                                 | 62790    | 821   | 16.8 (14.9, 19.1) | 8.2 (7.2, 9.2)  | 1.3 (1.2, 1.4) | 10 (6, 18)        | 72 (51, 94)       | 42 (26, 61)       | 164 (91, 281)    | 1143 (815, 1501)  | 672 (409, 979)    | 1.3 (0.7, 1.9) | 8.7 (6.6, 10.7)   | 5.1 (3.2, 7)    |
| Female                                  | 260579   | 445   | 17 (13.3, 20.7)   | 8.5 (6.5, 10.6) | 1.4 (0.9, 1.8) | 6 (3, 12)         | 40 (25, 58)       | 24 (12, 39)       | 23 (12, 46)      | 153 (97, 223)     | 93 (46, 151)      | 1.3 (0.9, 1.8) | 9 (7.3, 10.6)     | 5.4 (4, 6.8)    |
| Male                                    | 245758   | 648   | 16.6 (13, 20.3)   | 8.4 (6.3, 10.4) | 1.3 (0.9, 1.8) | 10 (6, 15)        | 66 (50, 84)       | 40 (27, 55)       | 40 (25, 60)      | 269 (202, 341)    | 163 (109, 224)    | 1.5 (1, 2.1)   | 10.2 (8.5, 12.2)  | 6.2 (4.3, 7.9)  |
| All                                     | 506337   | 1094  | 16.9 (14.3, 19.5) | 8.5 (7, 9.9)    | 1.4 (1, 1.7)   | 16 (11, 23)       | 106 (84, 131)     | 64 (46, 87)       | 31 (21, 46)      | 210 (166, 259)    | 127 (91, 172)     | 1.4 (1.1, 1.8) | 9.7 (8.5, 10.9)   | 5.9 (4.7, 7)    |
| <b>Côte d'Ivoire</b>                    |          |       |                   |                 |                |                   |                   |                   |                  |                   |                   |                |                   |                 |
| Age 25-69                               | 6638069  | 6416  | 13.9 (12.8, 14.9) | 1.9 (1.7, 2.1)  | 0.9 (0.7, 1)   | 518 (383, 680)    | 518 (383, 680)    | 609 (506, 713)    | 78 (58, 102)     | 78 (58, 102)      | 92 (76, 107)      | 8.1 (6.7, 9.5) | 8.1 (6.7, 9.5)    | 9.5 (8.6, 10.4) |
| Age 70+                                 | 1075688  | 23810 | 13.8 (12.1, 15.7) | 1.8 (1.5, 2.1)  | 0.8 (0.6, 1)   | 1387 (925, 1951)  | 1387 (925, 1951)  | 1454 (1177, 1764) | 1289 (860, 1814) | 1289 (860, 1814)  | 1351 (1094, 1640) | 5.8 (4.1, 7.4) | 5.8 (4, 7.6)      | 6.1 (5, 7)      |
| Female                                  | 3990857  | 15843 | 14.2 (11.1, 17.2) | 1.9 (1.3, 2.5)  | 0.9 (0.5, 1.2) | 925 (554, 1447)   | 925 (554, 1447)   | 1033 (777, 1343)  | 232 (139, 363)   | 232 (139, 363)    | 259 (195, 336)    | 5.8 (4.4, 7.2) | 5.8 (4.4, 7.1)    | 6.5 (5.7, 7.2)  |
| Male                                    | 3722900  | 14397 | 13.6 (10.6, 16.6) | 1.8 (1.3, 2.4)  | 0.9 (0.5, 1.2) | 980 (712, 1297)   | 980 (712, 1297)   | 1029 (864, 1198)  | 263 (191, 348)   | 263 (191, 348)    | 276 (232, 322)    | 6.8 (5.2, 8.4) | 6.8 (5.3, 8.3)    | 7.1 (6.3, 7.9)  |
| All                                     | 7713757  | 30283 | 13.9 (11.7, 16)   | 1.9 (1.5, 2.3)  | 0.9 (0.6, 1.1) | 1905 (1421, 2494) | 1905 (1421, 2494) | 2063 (1755, 2393) | 247 (184, 323)   | 247 (184, 323)    | 267 (228, 310)    | 6.3 (5.2, 7.4) | 6.3 (5.3, 7.2)    | 6.8 (6.2, 7.4)  |
| <b>Democratic Republic of the Congo</b> |          |       |                   |                 |                |                   |                   |                   |                  |                   |                   |                |                   |                 |
| Age 25-69                               | 21114819 | 11758 | 12.3 (11.4, 13.3) | 4.1 (3.8, 4.4)  | 0.8 (0.7, 1)   | 616 (478, 777)    | 2039 (1664, 2472) | 549 (385, 741)    | 29 (23, 37)      | 97 (79, 117)      | 26 (18, 35)       | 5.2 (4.2, 6.2) | 17.3 (15.2, 19.6) | 4.7 (3.5, 5.8)  |
| Age 70+                                 | 985333   | 8940  | 12.3 (10.7, 14.1) | 3.9 (3.4, 4.5)  | 0.8 (0.6, 1)   | 330 (228, 449)    | 1086 (798, 1378)  | 260 (153, 382)    | 335 (232, 456)   | 1102 (809, 1399)  | 264 (155, 388)    | 3.7 (2.5, 4.8) | 12.1 (9.3, 15)    | 2.9 (1.6, 4.3)  |
| Female                                  | 11290949 | 9862  | 12.5 (9.8, 15.3)  | 4.1 (3, 5.2)    | 0.8 (0.5, 1.2) | 465 (342, 604)    | 1416 (1102, 1757) | 375 (252, 512)    | 41 (30, 53)      | 125 (98, 156)     | 33 (22, 45)       | 4.7 (3.6, 5.8) | 14.4 (11.7, 17)   | 3.8 (2.4, 5.1)  |
| Male                                    | 10809203 | 10802 | 12.1 (9.5, 14.8)  | 4 (3, 5.1)      | 0.8 (0.5, 1.2) | 481 (366, 619)    | 1709 (1362, 2104) | 435 (287, 621)    | 44 (34, 57)      | 158 (126, 195)    | 40 (27, 57)       | 4.5 (3.3, 5.6) | 15.8 (13, 18.8)   | 4 (2.4, 5.6)    |





|                                       |          |       |                   |                |                |                |                   |                |                   |                   |                  |                   |                   |                  |
|---------------------------------------|----------|-------|-------------------|----------------|----------------|----------------|-------------------|----------------|-------------------|-------------------|------------------|-------------------|-------------------|------------------|
| Age 25-69                             | 2581863  | 1443  | 6.7 (6.1, 7.2)    | 5.8 (5.4, 6.2) | 1.5 (1.3, 1.8) | 27 (20, 35)    | 203 (170, 235)    | 170 (136, 208) | 11 (8, 14)        | 79 (66, 91)       | 66 (53, 81)      | 1.9 (1.4, 2.4)    | 14.1 (12.1, 16)   | 11.8 (9.2, 14.2) |
| Age 70+                               | 292031   | 4430  | 6.7 (5.9, 7.4)    | 5.5 (4.9, 6.3) | 1.4 (1, 1.7)   | 50 (29, 81)    | 412 (298, 534)    | 301 (180, 437) | 171 (98, 278)     | 1411 (1021, 1827) | 1032 (615, 1497) | 1.1 (0.6, 1.6)    | 9.3 (7.2, 11.4)   | 6.8 (4.4, 9.2)   |
| Female                                | 1611733  | 3161  | 6.8 (5.3, 8.3)    | 5.8 (4.3, 7.3) | 1.5 (1.1, 2)   | 40 (23, 66)    | 320 (231, 420)    | 254 (147, 361) | 25 (15, 41)       | 199 (143, 261)    | 158 (91, 224)    | 1.3 (0.8, 1.7)    | 10.1 (8.2, 12.1)  | 8 (5.8, 10.4)    |
| Male                                  | 1262161  | 2711  | 6.6 (5.1, 8)      | 5.7 (4.3, 7.2) | 1.5 (1, 1.9)   | 37 (24, 58)    | 295 (225, 370)    | 218 (145, 299) | 30 (19, 46)       | 233 (179, 293)    | 173 (115, 237)   | 1.4 (0.9, 1.9)    | 10.9 (8.9, 12.9)  | 8 (6, 10.2)      |
| All                                   | 2873894  | 5864  | 6.7 (5.6, 7.7)    | 5.8 (4.7, 6.8) | 1.5 (1.2, 1.8) | 77 (54, 110)   | 615 (492, 742)    | 472 (337, 613) | 27 (19, 38)       | 214 (171, 258)    | 164 (117, 213)   | 1.3 (1, 1.7)      | 10.5 (9.1, 11.8)  | 8 (6.5, 9.6)     |
| <b>Equatorial Guinea</b>              |          |       |                   |                |                |                |                   |                |                   |                   |                  |                   |                   |                  |
| Age 25-69                             | 276854   | 131   | 11.1 (10.2, 12)   | 5.4 (5, 5.8)   | 1.1 (0.9, 1.3) | 4 (3, 6)       | 20 (14, 26)       | 10 (6, 15)     | 15 (10, 22)       | 71 (50, 95)       | 36 (21, 54)      | 3.2 (2.4, 3.9)    | 15.1 (13.1, 17.1) | 7.5 (5.5, 9.6)   |
| Age 70+                               | 12737    | 109   | 11 (9.7, 12.5)    | 5.2 (4.6, 5.9) | 1 (0.7, 1.4)   | 2 (1, 4)       | 11 (7, 16)        | 5 (2, 8)       | 183 (108, 278)    | 873 (581, 1230)   | 384 (189, 602)   | 2.1 (1.3, 3)      | 10.2 (7.7, 12.6)  | 4.5 (2.5, 6.5)   |
| Female                                | 137120   | 76    | 11.3 (8.8, 13.7)  | 5.5 (4.1, 6.9) | 1.1 (0.7, 1.5) | 2 (1, 3)       | 9 (6, 12)         | 4 (2, 7)       | 15 (9, 23)        | 64 (44, 88)       | 32 (17, 49)      | 2.8 (1.9, 3.7)    | 11.6 (9.4, 14)    | 5.7 (3.6, 7.7)   |
| Male                                  | 152471   | 165   | 11 (8.5, 13.4)    | 5.4 (4, 6.7)   | 1.1 (0.7, 1.5) | 4 (3, 6)       | 22 (16, 29)       | 10 (6, 15)     | 29 (18, 42)       | 145 (102, 192)    | 68 (40, 101)     | 2.7 (1.7, 3.6)    | 13.4 (10.9, 15.9) | 6.4 (3.9, 8.6)   |
| All                                   | 289591   | 241   | 11.1 (9.4, 12.8)  | 5.4 (4.5, 6.4) | 1.1 (0.8, 1.4) | 7 (5, 9)       | 31 (24, 39)       | 15 (10, 20)    | 22 (16, 30)       | 107 (82, 134)     | 51 (34, 70)      | 2.7 (2.1, 3.4)    | 12.8 (11, 14.5)   | 6.2 (4.5, 7.8)   |
| <b>Eritrea</b>                        |          |       |                   |                |                |                |                   |                |                   |                   |                  |                   |                   |                  |
| Age 25-69                             | 1940113  | 763   | 6.3 (5.7, 6.9)    | 4.2 (3.8, 4.6) | 0.6 (0.5, 0.7) | 12 (8, 16)     | 135 (110, 160)    | 16 (11, 23)    | 6 (4, 8)          | 69 (57, 82)       | 8 (5, 12)        | 1.5 (1.1, 2)      | 17.6 (15.3, 20.1) | 2.1 (1.3, 2.9)   |
| Age 70+                               | 69301    | 511   | 6.3 (5.3, 7.3)    | 4.1 (3.5, 4.7) | 0.5 (0.4, 0.7) | 5 (3, 8)       | 61 (44, 81)       | 6 (3, 10)      | 72 (44, 113)      | 880 (631, 1165)   | 87 (40, 146)     | 1 (0.5, 1.5)      | 11.9 (8.7, 14.8)  | 1.2 (0.5, 1.8)   |
| Female                                | 1053264  | 690   | 6.4 (5, 7.8)      | 4.3 (3.2, 5.4) | 0.6 (0.2, 0.9) | 9 (6, 12)      | 100 (77, 125)     | 11 (7, 17)     | 8 (6, 12)         | 95 (73, 119)      | 11 (6, 16)       | 1.2 (0.8, 1.7)    | 14.5 (11.7, 17.2) | 1.6 (0.9, 2.4)   |
| Male                                  | 956150   | 584   | 6.3 (4.9, 7.6)    | 4.1 (3, 5.2)   | 0.6 (0.2, 0.9) | 8 (6, 11)      | 96 (77, 116)      | 11 (6, 16)     | 9 (6, 12)         | 100 (80, 122)     | 11 (7, 17)       | 1.4 (0.8, 2)      | 16.4 (12.9, 19.8) | 1.8 (0.9, 2.8)   |
| All                                   | 2009414  | 1277  | 6.4 (5.4, 7.4)    | 4.2 (3.4, 5)   | 0.6 (0.3, 0.8) | 17 (13, 22)    | 196 (165, 228)    | 22 (15, 29)    | 8 (6, 11)         | 97 (82, 113)      | 11 (8, 15)       | 1.3 (0.9, 1.7)    | 15.3 (13.3, 17.5) | 1.7 (1.1, 2.3)   |
| <b>Estonia</b>                        |          |       |                   |                |                |                |                   |                |                   |                   |                  |                   |                   |                  |
| Age 25-69                             | 784107   | 920   | 11.6 (11.3, 11.9) | 5.6 (5.4, 5.8) | 1 (1, 1.1)     | 31 (24, 39)    | 123 (98, 148)     | 58 (48, 68)    | 40 (31, 50)       | 157 (125, 189)    | 74 (62, 87)      | 3.4 (2.9, 3.9)    | 13.4 (11.9, 15)   | 6.3 (5.6, 6.8)   |
| Age 70+                               | 167698   | 4636  | 11.6 (11.1, 12.1) | 5.4 (5, 5.8)   | 1 (0.9, 1.1)   | 125 (84, 175)  | 443 (321, 578)    | 182 (143, 225) | 747 (502, 1041)   | 2642 (1917, 3447) | 1087 (850, 1342) | 2.7 (2, 3.5)      | 9.6 (7.5, 11.6)   | 3.9 (3.3, 4.7)   |
| Female                                | 533640   | 3297  | 11.7 (9.2, 14.3)  | 5.6 (4.2, 7)   | 1 (0.6, 1.4)   | 95 (57, 142)   | 318 (202, 440)    | 134 (99, 174)  | 179 (107, 266)    | 596 (378, 825)    | 251 (185, 325)   | 2.9 (2.4, 3.4)    | 9.7 (8.3, 11.1)   | 4.1 (3.6, 4.6)   |
| Male                                  | 418165   | 2250  | 11.4 (8.9, 13.9)  | 5.5 (4.1, 6.9) | 1 (0.6, 1.4)   | 61 (46, 81)    | 248 (197, 305)    | 106 (89, 125)  | 147 (109, 193)    | 594 (471, 729)    | 254 (214, 298)   | 2.7 (2.2, 3.3)    | 11 (9.3, 12.8)    | 4.7 (4.1, 5.3)   |
| All                                   | 951805   | 5536  | 11.6 (9.8, 13.4)  | 5.5 (4.5, 6.5) | 1 (0.8, 1.3)   | 157 (116, 207) | 566 (444, 698)    | 240 (199, 282) | 165 (122, 218)    | 595 (466, 734)    | 252 (209, 297)   | 2.8 (2.4, 3.2)    | 10.2 (9.1, 11.4)  | 4.3 (3.9, 4.7)   |
| <b>Ethiopia</b>                       |          |       |                   |                |                |                |                   |                |                   |                   |                  |                   |                   |                  |
| Age 25-69                             | 29384403 | 8500  | 9.2 (8.5, 9.8)    | 3.2 (2.9, 3.5) | 0.6 (0.5, 0.6) | 106 (80, 144)  | 1633 (1323, 1962) | 169 (108, 241) | 4 (3, 5)          | 56 (45, 67)       | 6 (4, 8)         | 1.2 (0.9, 1.6)    | 19.2 (16.9, 21.7) | 2 (1.3, 2.6)     |
| Age 70+                               | 1583154  | 6477  | 9.1 (7.9, 10.4)   | 3.1 (2.6, 3.5) | 0.5 (0.4, 0.7) | 53 (34, 78)    | 875 (643, 1137)   | 76 (38, 127)   | 33 (21, 49)       | 552 (406, 718)    | 48 (24, 80)      | 0.8 (0.5, 1.1)    | 13.5 (10.5, 16.8) | 1.2 (0.5, 1.8)   |
| Female                                | 15782831 | 6828  | 9.3 (7.3, 11.4)   | 3.2 (2.3, 4.1) | 0.6 (0.2, 0.9) | 70 (50, 96)    | 1104 (892, 1340)  | 112 (69, 169)  | 4 (3, 6)          | 70 (56, 85)       | 7 (4, 11)        | 1 (0.7, 1.3)      | 16.2 (13.2, 18.9) | 1.6 (0.9, 2.4)   |
| Male                                  | 15184726 | 8153  | 9.1 (7.1, 11.1)   | 3.1 (2.3, 4)   | 0.5 (0.2, 0.9) | 89 (62, 122)   | 1403 (1080, 1719) | 133 (79, 200)  | 6 (4, 8)          | 92 (71, 113)      | 9 (5, 13)        | 1.1 (0.7, 1.5)    | 17.2 (14.2, 20.3) | 1.6 (0.8, 2.4)   |
| All                                   | 30967557 | 15055 | 9.2 (7.8, 10.7)   | 3.2 (2.5, 3.8) | 0.6 (0.3, 0.8) | 159 (125, 200) | 2507 (2121, 2882) | 245 (174, 328) | 5 (4, 6)          | 81 (68, 93)       | 8 (6, 11)        | 1.1 (0.8, 1.3)    | 16.7 (14.5, 18.7) | 1.6 (1.1, 2.2)   |
| <b>Federated States of Micronesia</b> |          |       |                   |                |                |                |                   |                |                   |                   |                  |                   |                   |                  |
| Age 25-69                             | 42749    | 47    | 22.9 (21.1, 24.6) | 2.2 (2, 2.4)   | 1.1 (0.9, 1.4) | 10 (7, 14)     | 10 (7, 14)        | 4 (2, 6)       | 242 (156, 336)    | 242 (156, 336)    | 94 (51, 147)     | 22 (19.4, 24.5)   | 21.9 (19.3, 24.6) | 8.5 (6, 11.1)    |
| Age 70+                               | 2669     | 23    | 22.9 (20.1, 25.8) | 2.1 (1.9, 2.4) | 1.1 (0.6, 1.5) | 3 (2, 5)       | 3 (2, 5)          | 1 (0, 2)       | 1211 (710, 1772)  | 1211 (710, 1772)  | 410 (178, 707)   | 14.2 (11.4, 17)   | 14.3 (11.4, 17.3) | 4.8 (2.5, 7.1)   |
| Female                                | 22898    | 21    | 23.2 (18.2, 28.2) | 2.2 (1.5, 2.9) | 1.2 (0.7, 1.6) | 4 (2, 5)       | 4 (2, 5)          | 1 (1, 2)       | 161 (108, 220)    | 161 (108, 220)    | 60 (35, 93)      | 17.7 (14.8, 20.7) | 17.9 (14.8, 21)   | 6.7 (4.2, 9.4)   |
| Male                                  | 22520    | 50    | 22.6 (17.6, 27.6) | 2.2 (1.5, 2.8) | 1.1 (0.7, 1.5) | 10 (6, 14)     | 10 (6, 14)        | 4 (2, 6)       | 439 (273, 617)    | 439 (273, 617)    | 166 (84, 271)    | 20 (16.8, 23.3)   | 19.9 (16.7, 23.1) | 7.6 (4.3, 10.7)  |
| All                                   | 45418    | 70    | 22.9 (19.3, 26.4) | 2.2 (1.7, 2.7) | 1.1 (0.9, 1.4) | 14 (10, 18)    | 14 (10, 18)       | 5 (3, 8)       | 299 (214, 390)    | 299 (214, 390)    | 113 (69, 165)    | 19.3 (17, 21.6)   | 19.4 (17.2, 21.6) | 7.4 (5.3, 9.4)   |
| <b>Fiji</b>                           |          |       |                   |                |                |                |                   |                |                   |                   |                  |                   |                   |                  |
| Age 25-69                             | 430110   | 914   | 23.8 (22, 25.6)   | 3.8 (3.5, 4.2) | 0.9 (0.8, 1.1) | 169 (140, 197) | 169 (140, 197)    | 54 (38, 70)    | 393 (327, 457)    | 393 (327, 457)    | 126 (89, 164)    | 18.5 (16.3, 20.8) | 18.5 (16.3, 20.7) | 5.9 (4.4, 7.4)   |
| Age 70+                               | 22335    | 417   | 23.6 (20.7, 26.6) | 3.7 (3.1, 4.3) | 0.9 (0.6, 1.1) | 53 (41, 65)    | 53 (41, 65)       | 15 (8, 21)     | 2365 (1825, 2916) | 2365 (1825, 2916) | 657 (380, 962)   | 12.6 (9.8, 15.5)  | 12.7 (9.8, 15.7)  | 3.5 (1.8, 5.1)   |

|                |          |        |                   |                |                |                     |                      |                     |                 |                   |                  |                   |                   |                |
|----------------|----------|--------|-------------------|----------------|----------------|---------------------|----------------------|---------------------|-----------------|-------------------|------------------|-------------------|-------------------|----------------|
| Female         | 223689   | 467    | 24 (18.8, 29.2)   | 3.9 (2.8, 4.9) | 0.9 (0.6, 1.3) | 72 (58, 86)         | 72 (58, 86)          | 22 (15, 31)         | 321 (259, 386)  | 321 (259, 386)    | 100 (68, 138)    | 15.4 (12.7, 18)   | 15.4 (13, 17.8)   | 4.8 (3.2, 6.3) |
| Male           | 228756   | 866    | 23.5 (18.3, 28.7) | 3.8 (2.8, 4.8) | 0.9 (0.6, 1.3) | 150 (123, 176)      | 150 (123, 176)       | 47 (32, 63)         | 656 (538, 771)  | 656 (538, 771)    | 204 (138, 275)   | 17.4 (14.4, 20.3) | 17.3 (14.3, 20.5) | 5.4 (3.6, 7.3) |
| All            | 452445   | 1331   | 23.7 (20, 27.4)   | 3.8 (3.1, 4.5) | 0.9 (0.7, 1.2) | 222 (191, 251)      | 222 (191, 251)       | 69 (52, 87)         | 490 (422, 555)  | 490 (422, 555)    | 153 (116, 193)   | 16.7 (14.8, 18.7) | 16.7 (14.6, 18.6) | 5.2 (3.9, 6.4) |
| <b>Finland</b> |          |        |                   |                |                |                     |                      |                     |                 |                   |                  |                   |                   |                |
| Age 25-69      | 3152810  | 2438   | 13.1 (12.9, 13.4) | 4 (3.8, 4.1)   | 0.8 (0.8, 0.8) | 156 (123, 190)      | 405 (323, 485)       | 93 (78, 111)        | 49 (39, 60)     | 128 (102, 154)    | 29 (25, 35)      | 6.4 (5.6, 7.2)    | 16.6 (14.7, 18.6) | 3.8 (3.5, 4.2) |
| Age 70+        | 656829   | 10226  | 13.2 (12.8, 13.6) | 3.8 (3.5, 4)   | 0.8 (0.7, 0.8) | 489 (342, 648)      | 1189 (856, 1515)     | 253 (201, 317)      | 744 (520, 987)  | 1811 (1304, 2307) | 386 (306, 482)   | 4.8 (3.6, 5.9)    | 11.6 (9.1, 13.8)  | 2.5 (2, 2.9)   |
| Female         | 1972098  | 6151   | 13.3 (10.4, 16.2) | 4 (2.9, 5)     | 0.8 (0.4, 1.1) | 313 (190, 457)      | 725 (456, 1008)      | 160 (113, 216)      | 159 (96, 232)   | 367 (231, 511)    | 81 (57, 109)     | 5.1 (4.3, 5.9)    | 11.8 (10.1, 13.4) | 2.6 (2.3, 2.9) |
| Male           | 1837541  | 6485   | 13 (10.1, 15.8)   | 3.9 (2.8, 4.9) | 0.8 (0.4, 1.1) | 331 (251, 417)      | 869 (672, 1076)      | 187 (154, 223)      | 180 (137, 227)  | 473 (366, 586)    | 102 (84, 121)    | 5.1 (4.3, 6)      | 13.4 (11.4, 15.4) | 2.9 (2.5, 3.2) |
| All            | 3809639  | 12635  | 13.2 (11.1, 15.2) | 3.9 (3.2, 4.7) | 0.8 (0.5, 1)   | 644 (494, 806)      | 1594 (1244, 1941)    | 346 (288, 410)      | 169 (130, 212)  | 418 (327, 510)    | 91 (76, 108)     | 5.1 (4.5, 5.7)    | 12.6 (11.3, 13.8) | 2.7 (2.5, 3)   |
| <b>France</b>  |          |        |                   |                |                |                     |                      |                     |                 |                   |                  |                   |                   |                |
| Age 25-69      | 35525864 | 11300  | 13.7 (13.4, 13.9) | 5.5 (5.1, 5.9) | 1 (0.9, 1)     | 902 (694, 1134)     | 1631 (1305, 1981)    | 680 (568, 799)      | 25 (20, 32)     | 46 (37, 56)       | 19 (16, 22)      | 8 (6.8, 9.1)      | 14.4 (12.6, 16.2) | 6 (5.4, 6.6)   |
| Age 70+        | 7964290  | 64616  | 13.7 (13.3, 14.2) | 5.2 (4.6, 5.8) | 0.9 (0.9, 1)   | 3563 (2352, 4952)   | 6237 (4325, 8278)    | 2404 (1828, 3123)   | 447 (295, 622)  | 783 (543, 1039)   | 302 (230, 392)   | 5.5 (4.1, 6.9)    | 9.7 (7.6, 11.7)   | 3.7 (3, 4.4)   |
| Female         | 22804599 | 37953  | 13.8 (10.8, 16.9) | 5.5 (4.1, 6.9) | 1 (0.6, 1.4)   | 2212 (1230, 3431)   | 3702 (2199, 5466)    | 1479 (1022, 2070)   | 97 (54, 150)    | 162 (96, 240)     | 65 (45, 91)      | 5.9 (4.8, 7)      | 9.8 (8.2, 11.3)   | 3.9 (3.4, 4.4) |
| Male           | 20685555 | 37883  | 13.5 (10.6, 16.5) | 5.3 (4, 6.7)   | 1 (0.6, 1.3)   | 2252 (1563, 3092)   | 4165 (3054, 5334)    | 1605 (1273, 2001)   | 109 (76, 149)   | 201 (148, 258)    | 78 (62, 97)      | 5.9 (4.8, 7.1)    | 11 (9.2, 12.8)    | 4.2 (3.6, 4.8) |
| All            | 43490154 | 75774  | 13.7 (11.6, 15.8) | 5.4 (4.4, 6.4) | 1 (0.7, 1.2)   | 4465 (3196, 5852)   | 7868 (5883, 9939)    | 3084 (2495, 3765)   | 103 (73, 135)   | 181 (135, 229)    | 71 (57, 87)      | 5.9 (5.1, 6.7)    | 10.4 (9.2, 11.5)  | 4.1 (3.7, 4.4) |
| <b>Gabon</b>   |          |        |                   |                |                |                     |                      |                     |                 |                   |                  |                   |                   |                |
| Age 25-69      | 611487   | 427    | 11 (10.1, 11.8)   | 3.5 (3.1, 3.9) | 0.7 (0.6, 0.9) | 11 (8, 15)          | 80 (63, 98)          | 14 (9, 21)          | 17 (13, 24)     | 130 (104, 160)    | 24 (14, 34)      | 2.5 (1.9, 3.1)    | 18.7 (16.4, 21)   | 3.4 (2.2, 4.5) |
| Age 70+        | 41632    | 465    | 10.9 (9.6, 12.4)  | 3.4 (2.8, 4)   | 0.7 (0.4, 0.9) | 8 (5, 12)           | 59 (43, 77)          | 9 (4, 15)           | 201 (127, 300)  | 1414 (1032, 1846) | 219 (107, 369)   | 1.8 (1.1, 2.5)    | 12.7 (9.9, 15.2)  | 2 (0.9, 3)     |
| Female         | 328408   | 309    | 11.1 (8.7, 13.6)  | 3.6 (2.6, 4.5) | 0.7 (0.4, 1.1) | 7 (5, 10)           | 44 (32, 57)          | 8 (4, 13)           | 21 (14, 32)     | 134 (98, 173)     | 24 (12, 38)      | 2.3 (1.6, 3)      | 14.2 (11.8, 16.6) | 2.5 (1.3, 3.7) |
| Male           | 324711   | 583    | 10.8 (8.4, 13.2)  | 3.4 (2.5, 4.4) | 0.7 (0.4, 1)   | 12 (8, 16)          | 95 (74, 116)         | 16 (9, 23)          | 37 (26, 50)     | 292 (228, 357)    | 49 (29, 71)      | 2.1 (1.4, 2.7)    | 16.2 (13.6, 19.1) | 2.7 (1.5, 4)   |
| All            | 653119   | 892    | 11 (9.3, 12.7)    | 3.5 (2.8, 4.2) | 0.7 (0.5, 0.9) | 19 (15, 25)         | 139 (115, 163)       | 24 (15, 32)         | 29 (22, 38)     | 212 (176, 249)    | 36 (23, 50)      | 2.1 (1.6, 2.6)    | 15.5 (13.7, 17.3) | 2.6 (1.8, 3.5) |
| <b>Georgia</b> |          |        |                   |                |                |                     |                      |                     |                 |                   |                  |                   |                   |                |
| Age 25-69      | 2448393  | 4709   | 12 (11.1, 12.8)   | 7 (6.5, 7.5)   | 1 (1, 1.1)     | 228 (171, 297)      | 537 (432, 651)       | 307 (262, 356)      | 93 (70, 121)    | 219 (177, 266)    | 125 (107, 146)   | 4.8 (3.8, 5.8)    | 11.4 (9.9, 13)    | 6.5 (5.8, 7.2) |
| Age 70+        | 475883   | 12900  | 12 (10.4, 13.5)   | 6.7 (5.9, 7.6) | 1 (0.9, 1)     | 438 (283, 615)      | 1029 (762, 1317)     | 500 (396, 617)      | 920 (594, 1292) | 2163 (1602, 2767) | 1051 (832, 1297) | 3.4 (2.2, 4.7)    | 8 (5.9, 10.2)     | 3.9 (3.1, 4.7) |
| Female         | 1610946  | 7760   | 12.1 (9.5, 14.8)  | 6.9 (5.2, 8.7) | 1 (0.6, 1.4)   | 294 (172, 449)      | 643 (427, 867)       | 332 (250, 430)      | 183 (107, 279)  | 399 (265, 538)    | 206 (155, 267)   | 3.8 (2.9, 4.7)    | 8.3 (6.7, 9.9)    | 4.3 (3.7, 4.8) |
| Male           | 1313330  | 9843   | 11.8 (9.2, 14.4)  | 7 (5.2, 8.7)   | 1 (0.6, 1.4)   | 371 (270, 507)      | 923 (726, 1142)      | 475 (393, 557)      | 283 (205, 386)  | 703 (553, 870)    | 361 (299, 424)   | 3.8 (2.7, 4.8)    | 9.4 (7.6, 11.1)   | 4.8 (4.1, 5.6) |
| All            | 2924276  | 17606  | 12 (10.1, 13.8)   | 7 (5.7, 8.2)   | 1 (0.7, 1.3)   | 666 (502, 861)      | 1566 (1270, 1881)    | 807 (691, 932)      | 228 (172, 294)  | 535 (434, 643)    | 276 (236, 319)   | 3.8 (3.1, 4.5)    | 8.9 (7.8, 10)     | 4.6 (4.1, 5)   |
| <b>Germany</b> |          |        |                   |                |                |                     |                      |                     |                 |                   |                  |                   |                   |                |
| Age 25-69      | 49657353 | 28535  | 13.7 (13.4, 13.9) | 4.1 (4, 4.2)   | 1.2 (1.1, 1.2) | 2191 (1751, 2644)   | 4729 (3796, 5623)    | 2273 (1935, 2656)   | 44 (35, 53)     | 95 (76, 113)      | 46 (39, 53)      | 7.7 (6.7, 8.6)    | 16.6 (14.8, 18.5) | 8 (7.2, 8.7)   |
| Age 70+        | 12350694 | 166985 | 13.7 (13.3, 14.1) | 3.9 (3.7, 4.1) | 1.1 (1.1, 1.2) | 9394 (6927, 12020)  | 19486 (14557, 24402) | 8643 (6851, 10663)  | 761 (561, 973)  | 1578 (1179, 1976) | 700 (555, 863)   | 5.6 (4.3, 6.8)    | 11.7 (9.3, 14.2)  | 5.2 (4.3, 6.1) |
| Female         | 32036052 | 99342  | 13.8 (10.8, 16.8) | 4.1 (3, 5.2)   | 1.2 (0.8, 1.6) | 5876 (3524, 8242)   | 11721 (7252, 16168)  | 5281 (3821, 7109)   | 183 (110, 257)  | 366 (226, 505)    | 165 (119, 222)   | 5.9 (5.1, 6.8)    | 11.8 (10.2, 13.4) | 5.3 (4.7, 5.9) |
| Male           | 29971995 | 96619  | 13.5 (10.6, 16.5) | 4 (3, 5.1)     | 1.2 (0.8, 1.6) | 5708 (4359, 7047)   | 12493 (9731, 15282)  | 5635 (4659, 6762)   | 190 (145, 235)  | 417 (325, 510)    | 188 (155, 226)   | 5.9 (5, 7)        | 12.9 (11, 14.9)   | 5.8 (5.1, 6.6) |
| All            | 62008047 | 195775 | 13.7 (11.6, 15.8) | 4.1 (3.3, 4.8) | 1.2 (0.9, 1.5) | 11584 (9057, 14228) | 24215 (19138, 29329) | 10916 (9156, 12968) | 187 (146, 229)  | 391 (309, 473)    | 176 (148, 209)   | 5.9 (5.3, 6.6)    | 12.4 (11.1, 13.6) | 5.6 (5.1, 6)   |
| <b>Ghana</b>   |          |        |                   |                |                |                     |                      |                     |                 |                   |                  |                   |                   |                |
| Age 25-69      | 9569288  | 4746   | 11.8 (10.9, 12.8) | 3.6 (3.3, 3.9) | 0.8 (0.7, 1)   | 199 (154, 249)      | 874 (723, 1038)      | 215 (153, 285)      | 21 (16, 26)     | 91 (76, 108)      | 22 (16, 30)      | 4.2 (3.3, 5)      | 18.4 (16.2, 20.7) | 4.5 (3.4, 5.7) |
| Age 70+        | 548633   | 4574   | 11.8 (10.2, 13.2) | 3.5 (3, 3.9)   | 0.8 (0.6, 1)   | 133 (91, 184)       | 581 (436, 744)       | 124 (76, 187)       | 243 (166, 335)  | 1059 (794, 1355)  | 225 (138, 341)   | 2.9 (2, 3.8)      | 12.7 (10, 15.5)   | 2.7 (1.4, 3.9) |
| Female         | 5017324  | 3972   | 12 (9.4, 14.6)    | 3.7 (2.7, 4.6) | 0.8 (0.5, 1.2) | 154 (113, 202)      | 599 (467, 742)       | 141 (91, 200)       | 31 (23, 40)     | 119 (93, 148)     | 28 (18, 40)      | 3.8 (2.9, 4.8)    | 15.1 (12.5, 17.7) | 3.5 (2.3, 4.7) |
| Male           | 5100597  | 5336   | 11.6 (9.1, 14.1)  | 3.6 (2.6, 4.5) | 0.8 (0.5, 1.2) | 178 (132, 231)      | 856 (691, 1029)      | 197 (135, 268)      | 35 (26, 45)     | 168 (136, 202)    | 39 (27, 53)      | 3.3 (2.4, 4.3)    | 16 (13.1, 18.9)   | 3.7 (2.3, 5.1) |

|                      |          |       |                   |                |                |                 |                   |                   |                |                   |                |                |                   |                |
|----------------------|----------|-------|-------------------|----------------|----------------|-----------------|-------------------|-------------------|----------------|-------------------|----------------|----------------|-------------------|----------------|
| All                  | 10117921 | 9301  | 11.8 (10, 13.7)   | 3.6 (2.9, 4.3) | 0.8 (0.6, 1.1) | 332 (268, 399)  | 1455 (1237, 1677) | 338 (254, 432)    | 33 (26, 39)    | 144 (122, 166)    | 33 (25, 43)    | 3.6 (2.9, 4.2) | 15.6 (13.8, 17.6) | 3.6 (2.6, 4.6) |
| <b>Greece</b>        |          |       |                   |                |                |                 |                   |                   |                |                   |                |                |                   |                |
| Age 25-69            | 6920248  | 4841  | 11.6 (11.3, 12)   | 5.1 (4.8, 5.4) | 1 (1, 1.1)     | 188 (145, 236)  | 740 (606, 863)    | 332 (288, 381)    | 27 (21, 34)    | 107 (88, 125)     | 48 (42, 55)    | 3.9 (3.2, 4.5) | 15.3 (13.5, 17.1) | 6.9 (6.1, 7.5) |
| Age 70+              | 1592628  | 22972 | 11.6 (11, 12.2)   | 4.9 (4.4, 5.3) | 1 (0.9, 1.1)   | 628 (409, 906)  | 2353 (1697, 3037) | 963 (743, 1220)   | 395 (257, 569) | 1478 (1065, 1907) | 605 (467, 766) | 2.7 (1.9, 3.6) | 10.2 (8.1, 12.5)  | 4.2 (3.5, 4.9) |
| Female               | 4360790  | 13796 | 11.8 (9.2, 14.4)  | 5.1 (3.8, 6.4) | 1.1 (0.7, 1.5) | 415 (227, 656)  | 1453 (902, 2034)  | 604 (428, 812)    | 95 (52, 150)   | 333 (207, 467)    | 139 (98, 186)  | 3 (2.3, 3.7)   | 10.5 (9, 12.2)    | 4.4 (3.8, 5)   |
| Male                 | 4152086  | 14013 | 11.5 (9, 14)      | 5 (3.7, 6.3)   | 1 (0.6, 1.4)   | 401 (289, 549)  | 1640 (1234, 2034) | 691 (564, 837)    | 97 (69, 132)   | 395 (297, 490)    | 167 (136, 202) | 2.9 (2.2, 3.4) | 11.7 (9.8, 13.6)  | 4.9 (4.2, 5.6) |
| All                  | 8512876  | 27872 | 11.6 (9.8, 13.4)  | 5.1 (4.1, 6)   | 1 (0.8, 1.3)   | 817 (595, 1102) | 3093 (2431, 3791) | 1295 (1067, 1557) | 96 (70, 129)   | 363 (286, 445)    | 152 (125, 183) | 2.9 (2.5, 3.4) | 11.1 (9.9, 12.2)  | 4.6 (4.2, 5.1) |
| <b>Grenada</b>       |          |       |                   |                |                |                 |                   |                   |                |                   |                |                |                   |                |
| Age 25-69            | 46816    | 32    | 8.8 (8.2, 9.5)    | 4.6 (4.2, 4.9) | 0.5 (0.5, 0.6) | 1 (0, 1)        | 5 (4, 6)          | 1 (0, 1)          | 11 (8, 14)     | 111 (93, 129)     | 12 (8, 17)     | 1.6 (1.2, 2)   | 16.2 (14.1, 18.4) | 1.7 (1.1, 2.3) |
| Age 70+              | 5396     | 83    | 8.8 (7.8, 9.9)    | 4.5 (3.8, 5)   | 0.5 (0.4, 0.6) | 1 (0, 1)        | 9 (7, 12)         | 1 (0, 1)          | 153 (92, 241)  | 1707 (1274, 2174) | 147 (71, 246)  | 1 (0.6, 1.4)   | 11.1 (8.6, 13.5)  | 0.9 (0.4, 1.5) |
| Female               | 26563    | 60    | 8.9 (6.9, 10.9)   | 4.6 (3.4, 5.8) | 0.5 (0.2, 0.8) | 1 (0, 1)        | 7 (5, 9)          | 1 (0, 1)          | 25 (15, 40)    | 267 (191, 351)    | 25 (12, 44)    | 1.1 (0.7, 1.4) | 11.8 (9.8, 13.8)  | 1.1 (0.6, 1.6) |
| Male                 | 25649    | 55    | 8.8 (6.8, 10.7)   | 4.5 (3.4, 5.7) | 0.5 (0.2, 0.8) | 1 (0, 1)        | 7 (6, 9)          | 1 (0, 1)          | 26 (18, 36)    | 285 (232, 340)    | 26 (16, 40)    | 1.2 (0.8, 1.7) | 13.3 (10.9, 15.7) | 1.2 (0.7, 1.8) |
| All                  | 52212    | 115   | 8.8 (7.5, 10.2)   | 4.6 (3.7, 5.4) | 0.5 (0.3, 0.8) | 1 (1, 2)        | 14 (12, 17)       | 1 (1, 2)          | 25 (19, 35)    | 276 (227, 326)    | 26 (17, 36)    | 1.2 (0.9, 1.4) | 12.5 (10.8, 14.1) | 1.2 (0.8, 1.5) |
| <b>Guatemala</b>     |          |       |                   |                |                |                 |                   |                   |                |                   |                |                |                   |                |
| Age 25-69            | 5099803  | 2288  | 7.2 (6.6, 7.7)    | 6.7 (6.2, 7.3) | 1 (0.9, 1)     | 50 (38, 66)     | 289 (242, 341)    | 139 (120, 159)    | 10 (8, 13)     | 57 (47, 67)       | 27 (23, 31)    | 2.2 (1.6, 2.8) | 12.6 (10.7, 14.5) | 6.1 (5.3, 6.8) |
| Age 70+              | 405430   | 3811  | 7.1 (6.3, 8)      | 6.4 (5.6, 7.2) | 0.9 (0.8, 1)   | 48 (29, 78)     | 311 (231, 404)    | 126 (97, 158)     | 119 (72, 192)  | 768 (571, 996)    | 310 (240, 389) | 1.3 (0.6, 1.9) | 8.2 (6.1, 10.3)   | 3.3 (2.6, 4)   |
| Female               | 2961217  | 2959  | 7.2 (5.6, 8.8)    | 6.8 (5.1, 8.4) | 1 (0.6, 1.4)   | 47 (30, 70)     | 278 (205, 352)    | 125 (103, 152)    | 16 (10, 23)    | 94 (69, 119)      | 42 (35, 51)    | 1.6 (1, 2.2)   | 9.4 (7.3, 11.4)   | 4.2 (3.5, 5)   |
| Male                 | 2544016  | 3132  | 7.1 (5.5, 8.6)    | 6.6 (4.9, 8.2) | 0.9 (0.6, 1.3) | 52 (37, 74)     | 322 (258, 396)    | 139 (114, 166)    | 21 (15, 29)    | 127 (101, 156)    | 55 (45, 65)    | 1.7 (1, 2.4)   | 10.3 (8, 12.4)    | 4.4 (3.7, 5.2) |
| All                  | 5505233  | 6088  | 7.2 (6, 8.3)      | 6.7 (5.5, 7.9) | 1 (0.7, 1.2)   | 99 (76, 131)    | 600 (504, 703)    | 265 (231, 303)    | 18 (14, 24)    | 109 (92, 128)     | 48 (42, 55)    | 1.6 (1.1, 2.1) | 9.9 (8.5, 11.4)   | 4.3 (3.8, 4.9) |
| <b>Guinea</b>        |          |       |                   |                |                |                 |                   |                   |                |                   |                |                |                   |                |
| Age 25-69            | 3523123  | 1573  | 13.1 (12, 14.1)   | 5.3 (4.9, 5.8) | 0.8 (0.7, 1)   | 109 (84, 135)   | 233 (190, 281)    | 74 (51, 100)      | 31 (24, 38)    | 66 (54, 80)       | 21 (14, 28)    | 6.9 (5.7, 8.1) | 14.8 (12.6, 16.9) | 4.7 (3.4, 6)   |
| Age 70+              | 193911   | 1491  | 12.9 (11.3, 14.7) | 5.2 (4.4, 5.9) | 0.8 (0.6, 1)   | 73 (49, 101)    | 156 (111, 204)    | 43 (24, 65)       | 375 (252, 519) | 803 (571, 1052)   | 222 (126, 333) | 4.9 (3.4, 6.4) | 10.4 (7.9, 13)    | 2.9 (1.5, 4.2) |
| Female               | 1861893  | 1742  | 13.3 (10.4, 16.2) | 5.4 (4, 6.8)   | 0.9 (0.5, 1.2) | 107 (80, 138)   | 214 (165, 265)    | 66 (41, 98)       | 58 (43, 74)    | 115 (89, 142)     | 36 (22, 52)    | 6.1 (4.7, 7.6) | 12.3 (9.7, 14.7)  | 3.8 (2.4, 5.1) |
| Male                 | 1855141  | 1322  | 12.8 (10, 15.6)   | 5.2 (3.9, 6.6) | 0.8 (0.5, 1.2) | 75 (56, 95)     | 175 (139, 213)    | 50 (33, 71)       | 40 (30, 51)    | 94 (75, 115)      | 27 (18, 38)    | 5.7 (4.2, 7.2) | 13.2 (10.6, 15.9) | 3.8 (2.3, 5.4) |
| All                  | 3717034  | 3059  | 13.1 (11, 15.1)   | 5.3 (4.4, 6.3) | 0.8 (0.6, 1.1) | 182 (148, 218)  | 389 (329, 453)    | 117 (86, 151)     | 49 (40, 59)    | 105 (88, 122)     | 31 (23, 41)    | 5.9 (4.9, 7)   | 12.7 (11, 14.5)   | 3.8 (2.8, 4.8) |
| <b>Guinea-Bissau</b> |          |       |                   |                |                |                 |                   |                   |                |                   |                |                |                   |                |
| Age 25-69            | 559128   | 296   | 12.2 (11.3, 13.2) | 5.2 (4.7, 5.6) | 0.8 (0.7, 0.9) | 16 (11, 21)     | 45 (33, 59)       | 13 (8, 18)        | 28 (20, 38)    | 81 (60, 105)      | 23 (14, 32)    | 5.3 (4.1, 6.3) | 15.3 (13.2, 17.4) | 4.3 (3, 5.6)   |
| Age 70+              | 28013    | 220   | 12.2 (10.6, 13.8) | 5 (4.3, 5.7)   | 0.7 (0.5, 0.9) | 8 (5, 12)       | 24 (16, 32)       | 6 (3, 9)          | 291 (180, 425) | 845 (575, 1151)   | 202 (104, 333) | 3.7 (2.4, 5)   | 10.8 (8.2, 13.1)  | 2.6 (1.2, 4)   |
| Female               | 300654   | 284   | 12.4 (9.7, 15.1)  | 5.2 (3.9, 6.6) | 0.8 (0.4, 1.2) | 14 (9, 19)      | 37 (26, 50)       | 10 (6, 15)        | 46 (31, 63)    | 124 (87, 165)     | 34 (19, 50)    | 4.8 (3.6, 6.1) | 13.1 (10.7, 15.4) | 3.6 (2, 4.9)   |
| Male                 | 286487   | 233   | 12 (9.4, 14.6)    | 5.1 (3.8, 6.4) | 0.8 (0.4, 1.1) | 10 (7, 14)      | 32 (23, 42)       | 8 (5, 13)         | 35 (23, 50)    | 111 (79, 146)     | 29 (17, 44)    | 4.3 (3, 5.6)   | 13.6 (10.8, 16.4) | 3.5 (2, 4.9)   |
| All                  | 587141   | 518   | 12.2 (10.3, 14.1) | 5.2 (4.2, 6.1) | 0.8 (0.5, 1)   | 24 (18, 30)     | 69 (54, 84)       | 18 (13, 25)       | 41 (31, 51)    | 117 (93, 143)     | 31 (22, 42)    | 4.6 (3.7, 5.5) | 13.3 (11.4, 15.2) | 3.6 (2.6, 4.5) |
| <b>Guyana</b>        |          |       |                   |                |                |                 |                   |                   |                |                   |                |                |                   |                |
| Age 25-69            | 343161   | 434   | 9.7 (9, 10.4)     | 2.7 (2.4, 3)   | 0.5 (0.4, 0.6) | 5 (4, 7)        | 88 (74, 103)      | 6 (4, 9)          | 15 (10, 20)    | 256 (216, 300)    | 18 (11, 27)    | 1.2 (0.8, 1.5) | 20.3 (17.9, 22.7) | 1.5 (1, 2)     |
| Age 70+              | 19968    | 423   | 9.7 (8.4, 10.9)   | 2.6 (2.1, 3)   | 0.5 (0.3, 0.6) | 3 (2, 5)        | 58 (46, 72)       | 3 (2, 6)          | 156 (99, 237)  | 2924 (2280, 3591) | 173 (84, 283)  | 0.7 (0.4, 1.1) | 13.8 (11, 16.8)   | 0.8 (0.3, 1.3) |
| Female               | 185883   | 397   | 9.8 (7.6, 11.9)   | 2.7 (1.9, 3.5) | 0.5 (0.2, 0.8) | 4 (2, 5)        | 64 (51, 77)       | 4 (3, 7)          | 19 (13, 27)    | 344 (274, 416)    | 24 (14, 36)    | 0.9 (0.6, 1.2) | 16.1 (13.5, 18.8) | 1.1 (0.6, 1.7) |
| Male                 | 177246   | 459   | 9.6 (7.5, 11.7)   | 2.6 (1.9, 3.4) | 0.5 (0.2, 0.8) | 5 (3, 7)        | 82 (68, 97)       | 5 (3, 8)          | 26 (18, 37)    | 465 (385, 545)    | 30 (17, 46)    | 1 (0.7, 1.4)   | 18 (15.1, 20.9)   | 1.2 (0.6, 1.7) |
| All                  | 363129   | 857   | 9.7 (8.2, 11.2)   | 2.7 (2.1, 3.2) | 0.5 (0.3, 0.7) | 8 (6, 10)       | 146 (126, 165)    | 10 (7, 13)        | 22 (17, 29)    | 403 (346, 456)    | 27 (19, 37)    | 1 (0.7, 1.2)   | 17.1 (15, 19.1)   | 1.1 (0.8, 1.5) |
| <b>Haiti</b>         |          |       |                   |                |                |                 |                   |                   |                |                   |                |                |                   |                |

|                  |           |         |                   |                 |                |                      |                         |                      |                  |                   |                   |                   |                   |                   |
|------------------|-----------|---------|-------------------|-----------------|----------------|----------------------|-------------------------|----------------------|------------------|-------------------|-------------------|-------------------|-------------------|-------------------|
| Age 25-69        | 4029501   | 3004    | 6.5 (6, 7)        | 5.6 (5.1, 6)    | 0.4 (0.3, 0.4) | 56 (37, 81)          | 441 (326, 573)          | 21 (11, 34)          | 14 (9, 20)       | 109 (81, 142)     | 5 (3, 8)          | 1.9 (1.3, 2.4)    | 14.7 (12.6, 16.7) | 0.7 (0.4, 1)      |
| Age 70+          | 258101    | 2886    | 6.4 (5.6, 7.2)    | 5.4 (4.7, 6.1)  | 0.3 (0.2, 0.4) | 35 (18, 62)          | 290 (172, 425)          | 11 (3, 22)           | 134 (68, 239)    | 1124 (668, 1647)  | 42 (13, 87)       | 1.2 (0.6, 1.7)    | 10.1 (7.7, 12.4)  | 0.4 (0.1, 0.6)    |
| Female           | 2209823   | 3356    | 6.5 (5.1, 8)      | 5.7 (4.2, 7.1)  | 0.4 (0.1, 0.7) | 52 (29, 81)          | 407 (249, 583)          | 19 (9, 34)           | 23 (13, 37)      | 184 (113, 264)    | 9 (4, 15)         | 1.6 (1, 2.1)      | 12.1 (9.8, 14.5)  | 0.6 (0.2, 0.9)    |
| Male             | 2077779   | 2554    | 6.4 (5, 7.8)      | 5.5 (4.1, 6.8)  | 0.4 (0.1, 0.7) | 39 (27, 55)          | 324 (257, 401)          | 13 (7, 20)           | 19 (13, 26)      | 156 (124, 193)    | 6 (3, 10)         | 1.5 (1, 2.1)      | 12.7 (10.4, 15)   | 0.5 (0.2, 0.8)    |
| All              | 4287602   | 5897    | 6.5 (5.5, 7.5)    | 5.6 (4.6, 6.6)  | 0.4 (0.2, 0.6) | 91 (66, 124)         | 731 (568, 919)          | 32 (19, 48)          | 21 (15, 29)      | 171 (133, 214)    | 7 (4, 11)         | 1.5 (1.1, 1.9)    | 12.4 (10.7, 14)   | 0.5 (0.3, 0.7)    |
| <b>Honduras</b>  |           |         |                   |                 |                |                      |                         |                      |                  |                   |                   |                   |                   |                   |
| Age 25-69        | 2972210   | 2339    | 9.1 (8.4, 9.9)    | 3.6 (3.3, 4)    | 1.4 (1.1, 1.7) | 32 (23, 44)          | 429 (342, 521)          | 249 (179, 331)       | 11 (8, 15)       | 144 (115, 175)    | 84 (60, 111)      | 1.4 (1, 1.7)      | 18.3 (15.9, 20.6) | 10.6 (8.1, 13.1)  |
| Age 70+          | 216951    | 4063    | 9.1 (7.9, 10.3)   | 3.5 (3, 4)      | 1.3 (0.9, 1.7) | 34 (21, 52)          | 502 (368, 645)          | 259 (152, 381)       | 158 (95, 239)    | 2314 (1695, 2972) | 1193 (702, 1757)  | 0.8 (0.5, 1.2)    | 12.4 (9.7, 14.8)  | 6.4 (3.7, 9)      |
| Female           | 1630914   | 3278    | 9.2 (7.2, 11.3)   | 3.7 (2.7, 4.7)  | 1.4 (1, 1.9)   | 34 (22, 50)          | 472 (355, 595)          | 264 (168, 382)       | 21 (14, 31)      | 289 (218, 365)    | 162 (103, 234)    | 1 (0.6, 1.4)      | 14.4 (11.8, 16.8) | 8 (5.5, 10.6)     |
| Male             | 1558247   | 3116    | 9 (7.1, 11)       | 3.6 (2.6, 4.6)  | 1.4 (0.9, 1.8) | 32 (22, 46)          | 459 (352, 574)          | 245 (163, 341)       | 21 (14, 29)      | 295 (226, 368)    | 157 (105, 219)    | 1 (0.7, 1.4)      | 14.7 (12.3, 17.1) | 7.9 (5.2, 10.5)   |
| All              | 3189161   | 6419    | 9.1 (7.7, 10.6)   | 3.6 (2.9, 4.3)  | 1.4 (1.1, 1.7) | 67 (49, 87)          | 931 (761, 1094)         | 508 (380, 653)       | 21 (15, 27)      | 292 (239, 343)    | 159 (119, 205)    | 1 (0.8, 1.3)      | 14.5 (12.8, 16.3) | 7.9 (6.2, 9.8)    |
| <b>Hungary</b>   |           |         |                   |                 |                |                      |                         |                      |                  |                   |                   |                   |                   |                   |
| Age 25-69        | 6136835   | 8739    | 13.7 (13.4, 13.9) | 9.9 (9.6, 10.3) | 1.1 (1.1, 1.2) | 493 (383, 602)       | 493 (383, 602)          | 646 (553, 754)       | 80 (62, 98)      | 80 (62, 98)       | 105 (90, 123)     | 5.6 (4.8, 6.5)    | 5.6 (4.8, 6.5)    | 7.4 (6.6, 8.1)    |
| Age 70+          | 1150485   | 29324   | 13.7 (13.3, 14.1) | 9.6 (9, 10.1)   | 1.1 (1, 1.1)   | 1209 (845, 1646)     | 1209 (845, 1646)        | 1326 (1055, 1632)    | 1051 (734, 1430) | 1051 (734, 1430)  | 1153 (917, 1418)  | 4.1 (3, 5.2)      | 4.1 (3, 5.2)      | 4.5 (3.7, 5.3)    |
| Female           | 3927010   | 20750   | 13.8 (10.8, 16.8) | 10 (7.6, 12.3)  | 1.1 (0.7, 1.5) | 870 (555, 1270)      | 870 (555, 1270)         | 1005 (766, 1285)     | 221 (141, 323)   | 221 (141, 323)    | 256 (195, 327)    | 4.2 (3.3, 5)      | 4.2 (3.3, 5)      | 4.9 (4.2, 5.4)    |
| Male             | 3360310   | 17387   | 13.5 (10.6, 16.5) | 9.8 (7.4, 12.1) | 1.1 (0.7, 1.5) | 832 (642, 1055)      | 832 (642, 1055)         | 968 (813, 1133)      | 248 (191, 314)   | 248 (191, 314)    | 288 (242, 337)    | 4.8 (3.8, 5.8)    | 4.8 (3.8, 5.8)    | 5.6 (4.8, 6.3)    |
| All              | 7287320   | 38083   | 13.7 (11.5, 15.8) | 9.9 (8.2, 11.6) | 1.1 (0.8, 1.4) | 1702 (1325, 2135)    | 1702 (1325, 2135)       | 1973 (1677, 2294)    | 234 (182, 293)   | 234 (182, 293)    | 271 (230, 315)    | 4.5 (3.9, 5.1)    | 4.5 (3.9, 5.1)    | 5.2 (4.7, 5.6)    |
| <b>Iceland</b>   |           |         |                   |                 |                |                      |                         |                      |                  |                   |                   |                   |                   |                   |
| Age 25-69        | 181964    | 65      | 14.4 (14.2, 14.6) | 2.9 (2.7, 3.1)  | 1.5 (1.4, 1.5) | 6 (5, 7)             | 12 (10, 15)             | 7 (6, 8)             | 32 (25, 39)      | 67 (53, 81)       | 38 (32, 45)       | 8.9 (7.7, 10.1)   | 18.7 (16.7, 20.7) | 10.7 (9.7, 11.6)  |
| Age 70+          | 27408     | 374     | 14.4 (14, 14.7)   | 2.8 (2.5, 3.1)  | 1.4 (1.3, 1.5) | 24 (17, 31)          | 48 (34, 62)             | 26 (21, 32)          | 872 (620, 1147)  | 1750 (1253, 2267) | 950 (762, 1167)   | 6.4 (5, 7.8)      | 12.8 (10.1, 15.4) | 7 (6, 8)          |
| Female           | 103252    | 181     | 14.5 (11.4, 17.7) | 2.9 (2.1, 3.7)  | 1.5 (1, 1.9)   | 12 (7, 18)           | 23 (15, 33)             | 13 (9, 18)           | 119 (71, 173)    | 227 (142, 323)    | 127 (91, 171)     | 6.7 (5.6, 7.8)    | 13 (11.1, 14.9)   | 7.3 (6.5, 8)      |
| Male             | 106120    | 258     | 14.2 (11.1, 17.3) | 2.8 (2, 3.6)    | 1.4 (1, 1.9)   | 17 (13, 22)          | 37 (27, 47)             | 20 (16, 24)          | 165 (119, 212)   | 345 (254, 438)    | 188 (151, 228)    | 6.8 (5.8, 7.8)    | 14.2 (12.2, 16.2) | 7.7 (6.9, 8.7)    |
| All              | 209372    | 438     | 14.4 (12.1, 16.6) | 2.9 (2.3, 3.5)  | 1.5 (1.1, 1.8) | 30 (23, 37)          | 60 (47, 75)             | 33 (27, 39)          | 142 (109, 179)   | 287 (223, 356)    | 158 (131, 187)    | 6.8 (6, 7.5)      | 13.7 (12.3, 15.1) | 7.5 (6.9, 8.1)    |
| <b>India</b>     |           |         |                   |                 |                |                      |                         |                      |                  |                   |                   |                   |                   |                   |
| Age 25-69        | 579099623 | 591770  | 4.5 (4.4, 4.5)    | 5 (4.6, 5.3)    | 1.1 (1, 1.1)   | 10013 (7195, 13570)  | 93674 (75675, 111187)   | 41218 (34745, 48104) | 17 (12, 23)      | 162 (131, 192)    | 71 (60, 83)       | 1.7 (1.3, 2.1)    | 15.8 (13.9, 17.8) | 7 (6.3, 7.7)      |
| Age 70+          | 36285538  | 522917  | 4.5 (4.3, 4.6)    | 4.8 (4.2, 5.4)  | 1 (0.9, 1)     | 5623 (3497, 8218)    | 57187 (43593, 71947)    | 22025 (17682, 26797) | 155 (96, 226)    | 1576 (1201, 1983) | 607 (487, 739)    | 1.1 (0.7, 1.5)    | 10.9 (8.7, 13.6)  | 4.2 (3.4, 5)      |
| Female           | 300660086 | 430186  | 4.5 (3.5, 5.5)    | 5 (3.7, 6.3)    | 1.1 (0.7, 1.5) | 5728 (3870, 8093)    | 54807 (42325, 67839)    | 23435 (19019, 28093) | 19 (13, 27)      | 182 (141, 226)    | 78 (63, 93)       | 1.3 (0.9, 1.8)    | 12.7 (10.4, 15)   | 5.4 (4.7, 6.1)    |
| Male             | 314725075 | 685307  | 4.4 (3.4, 5.4)    | 4.9 (3.6, 6.2)  | 1 (0.6, 1.4)   | 9908 (7031, 13643)   | 96054 (78740, 114776)   | 39808 (33728, 46527) | 31 (22, 43)      | 305 (250, 365)    | 126 (107, 148)    | 1.4 (0.9, 2)      | 14 (11.7, 16.3)   | 5.8 (5, 6.7)      |
| All              | 615385161 | 1116344 | 4.5 (3.8, 5.2)    | 4.9 (4, 5.8)    | 1.1 (0.8, 1.3) | 15636 (12147, 20062) | 150861 (129078, 174543) | 63243 (55657, 71061) | 25 (20, 33)      | 245 (210, 284)    | 103 (90, 115)     | 1.4 (1.1, 1.7)    | 13.5 (11.7, 15.2) | 5.7 (5.1, 6.2)    |
| <b>Indonesia</b> |           |         |                   |                 |                |                      |                         |                      |                  |                   |                   |                   |                   |                   |
| Age 25-69        | 123754277 | 59387   | 19.3 (18.8, 19.8) | 3.2 (3.1, 3.2)  | 1 (0.9, 1)     | 11228 (9179, 13332)  | 11309 (9233, 13418)     | 3438 (2880, 4044)    | 91 (74, 108)     | 91 (75, 108)      | 28 (23, 33)       | 19 (16.8, 21.3)   | 19 (16.7, 21.3)   | 5.8 (5.1, 6.5)    |
| Age 70+          | 8111973   | 65888   | 19.2 (18.5, 20)   | 3.1 (3, 3.1)    | 0.9 (0.8, 1)   | 8773 (6715, 10806)   | 8798 (6731, 10835)      | 2322 (1824, 2938)    | 1081 (828, 1332) | 1085 (830, 1336)  | 286 (225, 362)    | 13.2 (10.6, 16.1) | 13.4 (10.5, 16.1) | 3.5 (2.8, 4.3)    |
| Female           | 67118589  | 47208   | 19.6 (15.3, 23.8) | 3.2 (2.3, 4.1)  | 1 (0.6, 1.4)   | 7054 (5600, 8673)    | 7054 (5600, 8673)       | 2032 (1627, 2479)    | 105 (83, 129)    | 105 (83, 129)     | 30 (24, 37)       | 15 (12.6, 17.6)   | 14.9 (12.5, 17.3) | 4.3 (3.7, 5)      |
| Male             | 64747661  | 78183   | 19 (14.8, 23.2)   | 3.1 (2.3, 4)    | 0.9 (0.6, 1.3) | 12946 (10554, 15179) | 13053 (10644, 15312)    | 3728 (3086, 4411)    | 200 (163, 234)   | 202 (164, 236)    | 58 (48, 68)       | 16.5 (13.8, 19.2) | 16.7 (14.1, 19.3) | 4.8 (4, 5.5)      |
| All              | 131866250 | 125133  | 19.3 (16.3, 22.3) | 3.2 (2.5, 3.8)  | 1 (0.7, 1.2)   | 20001 (17056, 22845) | 20107 (17144, 22960)    | 5760 (4999, 6638)    | 152 (129, 173)   | 152 (130, 174)    | 44 (38, 50)       | 15.9 (14.1, 17.8) | 16.1 (14.1, 17.9) | 4.6 (4.1, 5.1)    |
| <b>Iran</b>      |           |         |                   |                 |                |                      |                         |                      |                  |                   |                   |                   |                   |                   |
| Age 25-69        | 38108650  | 33160   | 10.8 (9.9, 11.6)  | 6.2 (5.7, 6.7)  | 2.4 (2.3, 2.6) | 950 (690, 1263)      | 4402 (3551, 5314)       | 7137 (6139, 8275)    | 25 (18, 33)      | 116 (93, 139)     | 187 (161, 217)    | 2.9 (2.1, 3.6)    | 13.3 (11.1, 15.3) | 21.4 (19.5, 23.4) |
| Age 70+          | 2640002   | 55222   | 10.8 (9.5, 12)    | 6 (5.3, 6.8)    | 2.3 (2.1, 2.4) | 1065 (692, 1577)     | 4984 (3734, 6407)       | 7261 (5946, 8697)    | 403 (262, 597)   | 1888 (1415, 2427) | 2750 (2252, 3294) | 1.9 (1.2, 2.7)    | 9 (7, 11.2)       | 13.2 (11.3, 15.3) |

|                |          |        |                   |                 |                |                   |                     |                      |                |                   |                   |                |                   |                   |
|----------------|----------|--------|-------------------|-----------------|----------------|-------------------|---------------------|----------------------|----------------|-------------------|-------------------|----------------|-------------------|-------------------|
| Female         | 20157704 | 31147  | 10.9 (8.5, 13.3)  | 6.3 (4.7, 7.9)  | 2.5 (1.8, 3.1) | 764 (501, 1085)   | 3177 (2395, 3949)   | 4972 (4087, 5948)    | 38 (25, 54)    | 158 (119, 196)    | 247 (203, 295)    | 2.5 (1.5, 3.4) | 10.2 (8.1, 12.4)  | 16 (14, 18)       |
| Male           | 20590948 | 57116  | 10.6 (8.3, 13)    | 6.2 (4.6, 7.7)  | 2.4 (1.8, 3)   | 1251 (858, 1727)  | 6209 (4861, 7619)   | 9426 (8041, 10940)   | 61 (42, 84)    | 302 (236, 370)    | 458 (391, 531)    | 2.2 (1.3, 3)   | 10.9 (8.6, 13.1)  | 16.5 (14.2, 18.4) |
| All            | 40748652 | 88196  | 10.8 (9.1, 12.5)  | 6.2 (5.1, 7.3)  | 2.4 (2, 2.9)   | 2015 (1546, 2637) | 9386 (7808, 11044)  | 14398 (12720, 16168) | 49 (38, 65)    | 230 (192, 271)    | 353 (312, 397)    | 2.3 (1.7, 2.9) | 10.6 (9.2, 12.2)  | 16.3 (14.8, 17.7) |
| <b>Iraq</b>    |          |        |                   |                 |                |                   |                     |                      |                |                   |                   |                |                   |                   |
| Age 25-69      | 11169743 | 9967   | 10.3 (9.4, 11.1)  | 4.4 (4.1, 4.8)  | 1.7 (1.4, 2)   | 175 (129, 225)    | 1658 (1334, 1975)   | 1371 (1043, 1756)    | 16 (12, 20)    | 148 (119, 177)    | 123 (93, 157)     | 1.8 (1.3, 2.2) | 16.6 (14.2, 19)   | 13.8 (11.1, 16.8) |
| Age 70+        | 628241   | 12742  | 10.3 (8.9, 11.6)  | 4.3 (3.7, 4.8)  | 1.6 (1.1, 2)   | 155 (97, 234)     | 1463 (1116, 1856)   | 1104 (713, 1567)     | 247 (154, 373) | 2328 (1776, 2955) | 1757 (1135, 2494) | 1.2 (0.7, 1.8) | 11.5 (8.9, 14.1)  | 8.7 (5.4, 11.6)   |
| Female         | 6122414  | 13342  | 10.4 (8.1, 12.7)  | 4.5 (3.3, 5.7)  | 1.7 (1.2, 2.2) | 203 (142, 285)    | 1761 (1390, 2184)   | 1406 (993, 1890)     | 33 (23, 46)    | 288 (227, 357)    | 230 (162, 309)    | 1.5 (1, 2.1)   | 13.2 (10.9, 15.5) | 10.5 (7.4, 13.8)  |
| Male           | 5675570  | 9321   | 10.1 (7.9, 12.4)  | 4.4 (3.2, 5.5)  | 1.7 (1.2, 2.2) | 127 (90, 175)     | 1359 (1083, 1634)   | 1068 (781, 1406)     | 22 (16, 31)    | 239 (191, 288)    | 188 (138, 248)    | 1.4 (0.9, 1.9) | 14.6 (11.7, 17.4) | 11.4 (8.3, 14.6)  |
| All            | 11797984 | 22725  | 10.3 (8.7, 11.9)  | 4.4 (3.6, 5.2)  | 1.7 (1.3, 2.1) | 330 (255, 415)    | 3121 (2662, 3596)   | 2475 (1941, 3023)    | 28 (22, 35)    | 264 (226, 305)    | 210 (165, 256)    | 1.5 (1.1, 1.8) | 13.7 (11.9, 15.7) | 10.9 (8.8, 13.2)  |
| <b>Ireland</b> |          |        |                   |                 |                |                   |                     |                      |                |                   |                   |                |                   |                   |
| Age 25-69      | 2630501  | 1342   | 12.8 (12.6, 13.1) | 5.2 (4.8, 5.6)  | 0.9 (0.9, 1)   | 80 (61, 103)      | 196 (157, 237)      | 73 (62, 86)          | 30 (23, 39)    | 75 (60, 90)       | 28 (24, 33)       | 6 (5, 7)       | 14.6 (12.7, 16.5) | 5.5 (4.9, 6)      |
| Age 70+        | 349272   | 5062   | 12.8 (12.4, 13.3) | 5 (4.3, 5.6)    | 0.9 (0.9, 1)   | 220 (144, 310)    | 515 (372, 672)      | 177 (141, 224)       | 629 (413, 887) | 1474 (1064, 1924) | 508 (403, 641)    | 4.3 (3.1, 5.6) | 10.2 (7.9, 12.4)  | 3.5 (2.9, 4.1)    |
| Female         | 1515329  | 2933   | 12.9 (10.1, 15.8) | 5.2 (3.9, 6.6)  | 1 (0.6, 1.3)   | 137 (81, 208)     | 305 (198, 433)      | 109 (79, 145)        | 90 (53, 138)   | 201 (131, 286)    | 72 (52, 96)       | 4.7 (3.7, 5.7) | 10.4 (8.6, 12.1)  | 3.7 (3.2, 4.2)    |
| Male           | 1464444  | 3481   | 12.7 (9.9, 15.4)  | 5.1 (3.8, 6.5)  | 0.9 (0.6, 1.3) | 163 (118, 217)    | 406 (314, 502)      | 141 (117, 168)       | 111 (80, 148)  | 277 (214, 342)    | 97 (80, 115)      | 4.7 (3.6, 5.7) | 11.7 (9.7, 13.6)  | 4.1 (3.5, 4.6)    |
| All            | 2979773  | 6429   | 12.8 (10.8, 14.8) | 5.2 (4.2, 6.1)  | 0.9 (0.7, 1.2) | 300 (221, 390)    | 711 (558, 874)      | 251 (211, 297)       | 101 (74, 131)  | 239 (187, 293)    | 84 (71, 100)      | 4.7 (3.9, 5.4) | 11.1 (9.7, 12.4)  | 3.9 (3.5, 4.3)    |
| <b>Israel</b>  |          |        |                   |                 |                |                   |                     |                      |                |                   |                   |                |                   |                   |
| Age 25-69      | 3748530  | 1196   | 9.8 (9.6, 10)     | 8.1 (7.3, 8.9)  | 1 (0.9, 1)     | 30 (19, 46)       | 110 (80, 143)       | 68 (55, 80)          | 8 (5, 12)      | 29 (21, 38)       | 18 (15, 21)       | 2.5 (1.7, 3.3) | 9.2 (7.5, 10.8)   | 5.6 (5, 6.3)      |
| Age 70+        | 547773   | 6250   | 9.8 (9.5, 10.1)   | 7.8 (6.4, 9.1)  | 0.9 (0.8, 1)   | 96 (47, 182)      | 396 (251, 578)      | 223 (164, 296)       | 176 (86, 332)  | 722 (459, 1056)   | 407 (299, 540)    | 1.5 (0.7, 2.3) | 6.3 (4.3, 8.4)    | 3.6 (2.9, 4.3)    |
| Female         | 2226022  | 3613   | 9.9 (7.7, 12.1)   | 8.1 (6.1, 10.1) | 1 (0.6, 1.3)   | 58 (24, 125)      | 232 (121, 378)      | 138 (89, 198)        | 26 (11, 56)    | 104 (54, 170)     | 62 (40, 89)       | 1.6 (0.9, 2.2) | 6.4 (4.9, 7.9)    | 3.8 (3.2, 4.3)    |
| Male           | 2070281  | 3793   | 9.7 (7.6, 11.8)   | 8 (6, 10)       | 0.9 (0.6, 1.3) | 69 (38, 126)      | 273 (180, 398)      | 152 (118, 192)       | 33 (18, 61)    | 132 (87, 192)     | 74 (57, 93)       | 1.8 (1, 2.6)   | 7.2 (5.5, 9.1)    | 4 (3.4, 4.7)      |
| All            | 4296303  | 7432   | 9.8 (8.3, 11.3)   | 8.1 (6.7, 9.4)  | 1 (0.7, 1.2)   | 127 (74, 213)     | 506 (355, 695)      | 290 (229, 363)       | 29 (17, 50)    | 118 (83, 162)     | 68 (53, 84)       | 1.7 (1.2, 2.2) | 6.8 (5.5, 8)      | 3.9 (3.5, 4.3)    |
| <b>Italy</b>   |          |        |                   |                 |                |                   |                     |                      |                |                   |                   |                |                   |                   |
| Age 25-69      | 36342055 | 13439  | 9.9 (9.7, 10.1)   | 5.4 (5, 5.8)    | 0.8 (0.8, 0.9) | 232 (157, 334)    | 1905 (1550, 2300)   | 586 (491, 686)       | 6 (4, 9)       | 52 (43, 63)       | 16 (14, 19)       | 1.7 (1.3, 2.2) | 14.2 (12.4, 15.9) | 4.4 (3.9, 4.8)    |
| Age 70+        | 9165930  | 101346 | 10 (9.7, 10.2)    | 5.2 (4.5, 5.9)  | 0.8 (0.7, 0.9) | 1138 (632, 2003)  | 9877 (7129, 13018)  | 2795 (2086, 3573)    | 124 (69, 218)  | 1078 (778, 1420)  | 305 (228, 390)    | 1.1 (0.6, 1.6) | 9.7 (7.6, 11.9)   | 2.8 (2.3, 3.2)    |
| Female         | 23795067 | 61171  | 10 (7.8, 12.3)    | 5.4 (4, 6.8)    | 0.8 (0.5, 1.2) | 721 (322, 1511)   | 5991 (3643, 9064)   | 1760 (1193, 2465)    | 30 (14, 64)    | 252 (153, 381)    | 74 (50, 104)      | 1.2 (0.9, 1.6) | 9.8 (8.2, 11.4)   | 2.9 (2.5, 3.2)    |
| Male           | 21712918 | 53674  | 9.8 (7.7, 12)     | 5.3 (4, 6.7)    | 0.8 (0.5, 1.2) | 649 (398, 1063)   | 5791 (4268, 7433)   | 1621 (1283, 2013)    | 30 (18, 49)    | 267 (197, 342)    | 75 (59, 93)       | 1.2 (0.8, 1.6) | 10.8 (9.1, 12.5)  | 3 (2.6, 3.4)      |
| All            | 45507985 | 114581 | 9.9 (8.4, 11.5)   | 5.4 (4.4, 6.3)  | 0.8 (0.6, 1.1) | 1370 (857, 2232)  | 11782 (9162, 14922) | 3381 (2664, 4174)    | 30 (19, 49)    | 259 (201, 328)    | 74 (59, 92)       | 1.2 (0.9, 1.5) | 10.3 (9.1, 11.4)  | 3 (2.7, 3.2)      |
| <b>Jamaica</b> |          |        |                   |                 |                |                   |                     |                      |                |                   |                   |                |                   |                   |
| Age 25-69      | 1299986  | 441    | 8 (7.9, 8.2)      | 5.4 (5.2, 5.6)  | 0.6 (0.5, 0.7) | 7 (6, 9)          | 65 (53, 78)         | 9 (6, 13)            | 6 (4, 7)       | 50 (41, 60)       | 7 (5, 10)         | 1.6 (1.3, 1.9) | 14.8 (12.9, 16.6) | 2.1 (1.5, 2.7)    |
| Age 70+        | 150168   | 1533   | 8 (7.8, 8.3)      | 5.2 (4.8, 5.5)  | 0.5 (0.4, 0.7) | 15 (11, 22)       | 152 (112, 202)      | 18 (8, 31)           | 103 (70, 148)  | 1015 (745, 1342)  | 119 (51, 210)     | 1 (0.7, 1.3)   | 9.9 (7.8, 12)     | 1.2 (0.6, 1.8)    |
| Female         | 754935   | 998    | 8.1 (6.3, 9.9)    | 5.4 (4, 6.8)    | 0.6 (0.3, 0.9) | 11 (7, 16)        | 104 (69, 146)       | 14 (5, 25)           | 14 (9, 21)     | 138 (91, 194)     | 18 (7, 34)        | 1.1 (0.8, 1.3) | 10.4 (8.8, 12.1)  | 1.4 (0.8, 1.9)    |
| Male           | 695219   | 980    | 7.9 (6.2, 9.7)    | 5.3 (3.9, 6.6)  | 0.6 (0.2, 0.9) | 12 (9, 16)        | 113 (85, 143)       | 14 (7, 21)           | 17 (12, 23)    | 163 (122, 206)    | 19 (11, 31)       | 1.2 (0.9, 1.5) | 11.6 (9.7, 13.4)  | 1.4 (0.8, 1.9)    |
| All            | 1450154  | 1974   | 8 (6.8, 9.3)      | 5.3 (4.4, 6.3)  | 0.6 (0.3, 0.8) | 23 (17, 30)       | 217 (175, 269)      | 27 (16, 41)          | 16 (12, 20)    | 150 (120, 186)    | 19 (11, 28)       | 1.1 (1, 1.3)   | 11 (9.6, 12.3)    | 1.4 (1, 1.8)      |
| <b>Japan</b>   |          |        |                   |                 |                |                   |                     |                      |                |                   |                   |                |                   |                   |
| Age 25-69      | 75476706 | 21685  | 8 (7.9, 8.1)      | 4.3 (4.2, 4.3)  | 1 (0.9, 1)     | 284 (230, 341)    | 3533 (2915, 4168)   | 1237 (1048, 1443)    | 4 (3, 5)       | 47 (39, 55)       | 16 (14, 19)       | 1.3 (1.1, 1.5) | 16.3 (14.5, 18.1) | 5.7 (5.2, 6.3)    |
| Age 70+        | 20967835 | 117918 | 8 (7.8, 8.2)      | 4.1 (4, 4.2)    | 0.9 (0.8, 1)   | 989 (699, 1327)   | 13264 (9609, 17280) | 4034 (3104, 5050)    | 47 (33, 63)    | 633 (458, 824)    | 192 (148, 241)    | 0.8 (0.7, 1)   | 11.2 (9.1, 13.6)  | 3.4 (2.9, 4)      |
| Female         | 50182422 | 71889  | 8.1 (6.3, 9.9)    | 4.3 (3.2, 5.4)  | 1 (0.6, 1.4)   | 624 (378, 926)    | 8233 (5146, 11821)  | 2582 (1789, 3491)    | 12 (8, 18)     | 164 (103, 236)    | 51 (36, 70)       | 0.9 (0.7, 1)   | 11.5 (9.7, 13)    | 3.6 (3.1, 4)      |
| Male           | 46262119 | 67459  | 7.9 (6.2, 9.6)    | 4.2 (3.1, 5.3)  | 1 (0.6, 1.3)   | 649 (480, 829)    | 8564 (6409, 10674)  | 2689 (2180, 3297)    | 14 (10, 18)    | 185 (139, 231)    | 58 (47, 71)       | 1 (0.8, 1.1)   | 12.7 (10.8, 14.5) | 4 (3.5, 4.5)      |



| Country   | Age Group | Population | Life Expectancy (Years) | Infant Mortality Rate (per 1,000 live births) | Under-5 Mortality Rate (per 1,000 live births) | Maternal Mortality Ratio (per 100,000 live births) | Crude Birth Rate (per 1,000 population) | Crude Death Rate (per 1,000 population) | Sex Ratio (males per 1,000 females) | Population Growth Rate (%) | Urban Population (%) | Healthcare Expenditure (USD per capita) | Human Development Index |                   |                   |
|-----------|-----------|------------|-------------------------|-----------------------------------------------|------------------------------------------------|----------------------------------------------------|-----------------------------------------|-----------------------------------------|-------------------------------------|----------------------------|----------------------|-----------------------------------------|-------------------------|-------------------|-------------------|
| Latvia    | Age 25-69 | 2491757    | 2372                    | 8 (7.2, 8.8)                                  | 3.4 (3.1, 3.7)                                 | 0.9 (0.7, 1)                                       | 31 (21, 43)                             | 454 (336, 573)                          | 121 (81, 165)                       | 12 (8, 17)                 | 182 (135, 230)       | 48 (32, 66)                             | 1.3 (1, 1.6)            | 19.1 (16.6, 21.5) | 5.1 (3.7, 6.4)    |
|           | Age 70+   | 147403     | 2288                    | 8 (6.6, 9.2)                                  | 3.2 (2.8, 3.7)                                 | 0.8 (0.6, 1)                                       | 19 (12, 28)                             | 299 (217, 389)                          | 69 (40, 105)                        | 129 (79, 193)              | 2028 (1473, 2641)    | 471 (273, 712)                          | 0.8 (0.5, 1.2)          | 13.1 (10.4, 16)   | 3 (1.5, 4.4)      |
|           | Female    | 1356667    | 2247                    | 8.2 (6.4, 9.9)                                | 3.4 (2.5, 4.3)                                 | 0.9 (0.5, 1.3)                                     | 23 (15, 33)                             | 345 (255, 445)                          | 88 (56, 126)                        | 17 (11, 24)                | 254 (188, 328)       | 65 (41, 93)                             | 1 (0.7, 1.4)            | 15.3 (12.7, 18)   | 3.9 (2.6, 5.3)    |
|           | Male      | 1282493    | 2410                    | 8 (6.2, 9.7)                                  | 3.3 (2.4, 4.2)                                 | 0.8 (0.5, 1.2)                                     | 27 (18, 39)                             | 408 (307, 525)                          | 102 (65, 145)                       | 21 (14, 30)                | 318 (239, 410)       | 79 (50, 113)                            | 1.1 (0.7, 1.5)          | 16.9 (13.7, 19.8) | 4.2 (2.6, 5.8)    |
|           | All       | 2639160    | 4669                    | 8 (6.8, 9.3)                                  | 3.4 (2.7, 4)                                   | 0.9 (0.6, 1.1)                                     | 50 (37, 64)                             | 753 (607, 909)                          | 190 (136, 246)                      | 19 (14, 24)                | 285 (230, 344)       | 72 (52, 93)                             | 1.1 (0.8, 1.4)          | 16.1 (14.2, 18)   | 4.1 (3.1, 5.1)    |
| Lebanon   | Age 25-69 | 1341389    | 2262                    | 14.3 (13.1, 15.3)                             | 7.5 (7, 8)                                     | 1.3 (1.2, 1.3)                                     | 201 (153, 253)                          | 228 (176, 283)                          | 197 (170, 227)                      | 150 (114, 188)             | 170 (131, 211)       | 147 (127, 169)                          | 8.9 (7.5, 10.2)         | 10.1 (8.5, 11.6)  | 8.7 (7.9, 9.5)    |
|           | Age 70+   | 278554     | 8179                    | 14.2 (12.3, 16.1)                             | 7.2 (6.2, 8.2)                                 | 1.2 (1.1, 1.3)                                     | 534 (359, 728)                          | 593 (407, 795)                          | 448 (361, 546)                      | 1917 (1288, 2615)          | 2129 (1462, 2854)    | 1608 (1297, 1960)                       | 6.5 (4.7, 8.5)          | 7.3 (5.2, 9.2)    | 5.5 (4.5, 6.5)    |
|           | Female    | 902893     | 5984                    | 14.3 (11.2, 17.5)                             | 7.5 (5.6, 9.3)                                 | 1.3 (0.8, 1.7)                                     | 409 (254, 591)                          | 441 (278, 632)                          | 345 (268, 433)                      | 453 (282, 654)             | 488 (308, 699)       | 382 (297, 479)                          | 6.8 (5.5, 8.2)          | 7.4 (6.1, 8.7)    | 5.8 (5.1, 6.4)    |
|           | Male      | 717050     | 4461                    | 14.1 (11, 17.2)                               | 7.4 (5.6, 9.2)                                 | 1.3 (0.8, 1.7)                                     | 326 (241, 414)                          | 380 (286, 475)                          | 301 (258, 349)                      | 454 (336, 578)             | 530 (399, 662)       | 419 (359, 486)                          | 7.3 (5.7, 8.8)          | 8.5 (6.7, 10.3)   | 6.7 (5.9, 7.6)    |
|           | All       | 1619943    | 10446                   | 14.3 (12, 16.5)                               | 7.5 (6.2, 8.7)                                 | 1.3 (1, 1.6)                                       | 735 (550, 933)                          | 821 (624, 1027)                         | 645 (555, 751)                      | 454 (339, 576)             | 507 (385, 634)       | 398 (343, 463)                          | 7 (6, 8)                | 7.9 (6.8, 9)      | 6.2 (5.6, 6.7)    |
| Lesotho   | Age 25-69 | 2218352    | 1868                    | 11.2 (10.9, 11.5)                             | 9.9 (9.2, 10.7)                                | 1.6 (1.4, 1.9)                                     | 77 (55, 108)                            | 113 (82, 153)                           | 235 (178, 294)                      | 35 (25, 48)                | 51 (37, 69)          | 106 (80, 132)                           | 4.1 (3.1, 5.2)          | 6 (4.7, 7.6)      | 12.5 (10.2, 14.9) |
|           | Age 70+   | 202819     | 3957                    | 11.1 (10.7, 11.6)                             | 9.5 (8.3, 10.8)                                | 1.5 (1.1, 1.9)                                     | 112 (69, 169)                           | 172 (112, 246)                          | 312 (210, 427)                      | 554 (338, 835)             | 848 (552, 1213)      | 1536 (1037, 2105)                       | 2.8 (1.6, 4)            | 4.3 (2.7, 5.8)    | 7.9 (5.3, 10.4)   |
|           | Female    | 1275803    | 2354                    | 11.3 (8.9, 13.8)                              | 10 (7.6, 12.4)                                 | 1.6 (1.1, 2.1)                                     | 80 (51, 120)                            | 107 (70, 157)                           | 213 (144, 288)                      | 62 (40, 94)                | 84 (55, 123)         | 167 (113, 226)                          | 3.4 (2.2, 4.5)          | 4.5 (3.2, 6)      | 9.1 (6.7, 11.2)   |
|           | Male      | 1145368    | 3479                    | 11 (8.6, 13.4)                                | 9.8 (7.4, 12.1)                                | 1.6 (1.1, 2)                                       | 110 (73, 159)                           | 178 (123, 246)                          | 333 (244, 429)                      | 96 (64, 139)               | 155 (107, 215)       | 291 (213, 374)                          | 3.2 (2, 4.2)            | 5.1 (3.6, 6.6)    | 9.6 (7.1, 12.1)   |
|           | All       | 2421171    | 5835                    | 11.2 (9.4, 12.9)                              | 9.9 (8.2, 11.6)                                | 1.6 (1.3, 1.9)                                     | 190 (140, 255)                          | 285 (216, 366)                          | 546 (428, 674)                      | 78 (58, 105)               | 118 (89, 151)        | 226 (177, 278)                          | 3.2 (2.4, 4.1)          | 4.9 (3.9, 5.9)    | 9.4 (7.6, 11.1)   |
| Liberia   | Age 25-69 | 791986     | 327                     | 4.5 (4.1, 5)                                  | 3.5 (3.2, 3.8)                                 | 0.7 (0.5, 0.8)                                     | 4 (3, 6)                                | 61 (48, 74)                             | 10 (6, 16)                          | 5 (4, 7)                   | 77 (60, 94)          | 13 (7, 20)                              | 1.3 (1, 1.7)            | 18.6 (16.1, 21.1) | 3.1 (1.7, 4.4)    |
|           | Age 70+   | 60115      | 417                     | 4.5 (3.8, 5.1)                                | 3.3 (2.9, 3.8)                                 | 0.6 (0.3, 0.9)                                     | 3 (2, 5)                                | 53 (38, 70)                             | 8 (3, 14)                           | 57 (35, 90)                | 878 (635, 1166)      | 128 (48, 230)                           | 0.8 (0.5, 1.2)          | 12.7 (10, 15.3)   | 1.9 (0.6, 3.1)    |
|           | Female    | 449080     | 357                     | 4.6 (3.5, 5.6)                                | 3.5 (2.5, 4.4)                                 | 0.7 (0.3, 1)                                       | 4 (2, 5)                                | 52 (38, 67)                             | 9 (4, 15)                           | 8 (5, 12)                  | 117 (84, 150)        | 19 (9, 33)                              | 1 (0.6, 1.4)            | 14.7 (11.8, 17.3) | 2.4 (1, 3.7)      |
|           | Male      | 403021     | 387                     | 4.4 (3.5, 5.4)                                | 3.4 (2.5, 4.3)                                 | 0.7 (0.3, 1)                                       | 4 (3, 6)                                | 61 (47, 77)                             | 9 (5, 15)                           | 10 (7, 15)                 | 152 (116, 190)       | 23 (12, 37)                             | 1.1 (0.7, 1.5)          | 15.8 (12.8, 18.8) | 2.4 (0.9, 3.9)    |
|           | All       | 852101     | 742                     | 4.5 (3.8, 5.2)                                | 3.4 (2.8, 4.1)                                 | 0.7 (0.4, 0.9)                                     | 8 (6, 10)                               | 114 (93, 135)                           | 18 (11, 26)                         | 9 (7, 12)                  | 133 (109, 158)       | 21 (13, 30)                             | 1 (0.7, 1.3)            | 15.3 (13.4, 17.3) | 2.4 (1.5, 3.3)    |
| Lithuania | Age 25-69 | 1417678    | 481                     | 15.5 (14.1, 16.7)                             | 2.2 (1.9, 2.4)                                 | 0.8 (0.7, 1)                                       | 58 (47, 69)                             | 101 (82, 119)                           | 23 (16, 30)                         | 41 (33, 49)                | 71 (58, 84)          | 16 (11, 21)                             | 12.1 (10.5, 13.8)       | 20.9 (18.5, 23.6) | 4.7 (3.5, 5.9)    |
|           | Age 70+   | 61280      | 367                     | 15.4 (13.3, 17.4)                             | 2.1 (1.8, 2.5)                                 | 0.8 (0.6, 1)                                       | 31 (23, 40)                             | 54 (40, 69)                             | 10 (6, 16)                          | 505 (371, 649)             | 883 (659, 1126)      | 171 (101, 257)                          | 8.5 (6.7, 10.5)         | 14.8 (11.6, 17.9) | 2.9 (1.6, 4.2)    |
|           | Female    | 748939     | 497                     | 15.7 (12.3, 19.1)                             | 2.2 (1.5, 2.9)                                 | 0.8 (0.5, 1.2)                                     | 53 (40, 64)                             | 89 (68, 109)                            | 19 (13, 27)                         | 70 (54, 86)                | 118 (91, 145)        | 26 (17, 36)                             | 10.6 (8.6, 12.7)        | 17.8 (14.7, 20.8) | 3.9 (2.6, 5.2)    |
|           | Male      | 730019     | 344                     | 15.2 (11.9, 18.6)                             | 2.1 (1.5, 2.8)                                 | 0.8 (0.5, 1.2)                                     | 36 (29, 44)                             | 66 (54, 79)                             | 14 (9, 19)                          | 50 (40, 60)                | 91 (74, 109)         | 19 (12, 27)                             | 10.5 (8.3, 12.5)        | 19.2 (16, 22.6)   | 4 (2.5, 5.5)      |
|           | All       | 1478958    | 842                     | 15.4 (13, 17.8)                               | 2.2 (1.7, 2.6)                                 | 0.8 (0.6, 1.1)                                     | 89 (74, 103)                            | 155 (130, 178)                          | 33 (25, 42)                         | 60 (50, 70)                | 105 (88, 121)        | 22 (17, 28)                             | 10.6 (9.2, 12)          | 18.4 (16, 20.7)   | 3.9 (2.9, 5)      |
| Libya     | Age 25-69 | 3134408    | 2733                    | 7.4 (6.8, 8)                                  | 7.8 (7.2, 8.5)                                 | 1.6 (1.3, 1.9)                                     | 67 (48, 91)                             | 272 (214, 338)                          | 356 (273, 442)                      | 21 (15, 29)                | 87 (68, 108)         | 114 (87, 141)                           | 2.4 (1.7, 3.2)          | 10 (8.1, 11.6)    | 13.1 (10.5, 15.8) |
|           | Age 70+   | 163521     | 2977                    | 7.4 (6.4, 8.3)                                | 7.5 (6.5, 8.6)                                 | 1.5 (1.1, 1.9)                                     | 45 (28, 72)                             | 205 (147, 278)                          | 236 (160, 324)                      | 278 (170, 442)             | 1253 (900, 1702)     | 1443 (975, 1982)                        | 1.5 (0.8, 2.3)          | 6.9 (5, 9)        | 7.9 (5.4, 10.6)   |
|           | Female    | 1641524    | 2368                    | 7.5 (5.9, 9.2)                                | 7.8 (5.9, 9.8)                                 | 1.6 (1.1, 2.1)                                     | 45 (28, 68)                             | 187 (136, 247)                          | 234 (167, 313)                      | 27 (17, 41)                | 114 (83, 150)        | 143 (102, 191)                          | 1.9 (1.1, 2.7)          | 7.9 (5.9, 10)     | 9.9 (7.2, 12.6)   |
|           | Male      | 1656405    | 3333                    | 7.3 (5.7, 8.9)                                | 7.7 (5.8, 9.6)                                 | 1.6 (1.1, 2.1)                                     | 68 (46, 98)                             | 290 (221, 370)                          | 358 (266, 456)                      | 41 (28, 59)                | 175 (134, 223)       | 216 (161, 275)                          | 2 (1.2, 3)              | 8.7 (6.5, 10.9)   | 10.7 (8, 13.5)    |
|           | All       | 3297929    | 5692                    | 7.4 (6.2, 8.6)                                | 7.8 (6.5, 9.2)                                 | 1.6 (1.3, 2)                                       | 112 (84, 150)                           | 477 (391, 578)                          | 592 (478, 715)                      | 34 (25, 45)                | 145 (118, 175)       | 180 (145, 217)                          | 2 (1.4, 2.6)            | 8.4 (6.9, 9.9)    | 10.4 (8.4, 12.4)  |
| Lithuania | Age 25-69 | 1952547    | 2995                    | 11.8 (11.5, 12.1)                             | 6.2 (5.7, 6.6)                                 | 1.2 (1.1, 1.2)                                     | 128 (93, 169)                           | 385 (312, 464)                          | 237 (202, 272)                      | 65 (48, 86)                | 197 (160, 238)       | 121 (104, 139)                          | 4.3 (3.4, 5.1)          | 12.9 (11.1, 14.5) | 7.9 (7.2, 8.6)    |
|           | Age 70+   | 383846     | 12067                   | 11.9 (11.3, 12.4)                             | 5.9 (5.1, 6.7)                                 | 1.1 (1, 1.2)                                       | 374 (233, 577)                          | 1066 (769, 1419)                        | 590 (469, 714)                      | 975 (607, 1502)            | 2777 (2004, 3696)    | 1538 (1222, 1860)                       | 3.1 (2, 4.1)            | 8.8 (6.8, 10.9)   | 4.9 (4.1, 5.7)    |



|                   |          |       |                   |                 |                |                   |                   |                   |                   |                   |                |                   |                   |                |
|-------------------|----------|-------|-------------------|-----------------|----------------|-------------------|-------------------|-------------------|-------------------|-------------------|----------------|-------------------|-------------------|----------------|
| Female            | 1296169  | 8436  | 12 (9.4, 14.6)    | 6.2 (4.6, 7.7)  | 1.2 (0.8, 1.6) | 280 (152, 470)    | 755 (476, 1064)   | 433 (329, 547)    | 216 (118, 363)    | 583 (368, 821)    | 334 (254, 422) | 3.3 (2.5, 4.2)    | 9 (7.5, 10.6)     | 5.1 (4.5, 5.7) |
| Male              | 1040224  | 6620  | 11.7 (9.1, 14.2)  | 6.1 (4.5, 7.6)  | 1.2 (0.8, 1.6) | 222 (152, 310)    | 696 (553, 855)    | 394 (334, 461)    | 213 (146, 298)    | 669 (532, 822)    | 379 (321, 443) | 3.4 (2.6, 4.3)    | 10.5 (8.6, 12.2)  | 5.9 (5.2, 6.7) |
| All               | 2336393  | 15056 | 11.8 (10, 13.7)   | 6.1 (5, 7.2)    | 1.2 (0.9, 1.5) | 502 (356, 710)    | 1451 (1137, 1796) | 827 (700, 957)    | 215 (152, 304)    | 621 (487, 768)    | 354 (300, 410) | 3.3 (2.7, 3.9)    | 9.6 (8.5, 10.8)   | 5.5 (5, 5.9)   |
| <b>Luxembourg</b> |          |       |                   |                 |                |                   |                   |                   |                   |                   |                |                   |                   |                |
| Age 25-69         | 301415   | 135   | 8.2 (7.5, 8.8)    | 4.8 (4.4, 5.1)  | 1.1 (0.9, 1.2) | 2 (1, 3)          | 21 (17, 25)       | 9 (6, 12)         | 7 (5, 10)         | 69 (55, 82)       | 30 (21, 40)    | 1.5 (1.1, 1.9)    | 15.4 (13.6, 17.3) | 6.7 (5.4, 8)   |
| Age 70+           | 50982    | 562   | 8.2 (7.1, 9.3)    | 4.5 (3.9, 5.2)  | 1 (0.8, 1.3)   | 5 (3, 9)          | 60 (44, 75)       | 25 (14, 37)       | 107 (64, 172)     | 1172 (855, 1480)  | 481 (279, 733) | 1 (0.5, 1.4)      | 10.6 (8.3, 12.7)  | 4.4 (2.8, 6)   |
| Female            | 179682   | 358   | 8.2 (6.4, 10)     | 4.8 (3.5, 6)    | 1.1 (0.7, 1.5) | 4 (2, 7)          | 39 (25, 53)       | 17 (8, 28)        | 20 (10, 37)       | 218 (141, 293)    | 93 (43, 154)   | 1 (0.7, 1.3)      | 10.9 (9.2, 12.7)  | 4.6 (3.4, 5.9) |
| Male              | 172715   | 336   | 8.1 (6.3, 9.8)    | 4.7 (3.5, 5.9)  | 1 (0.6, 1.4)   | 4 (3, 6)          | 41 (33, 51)       | 17 (11, 23)       | 23 (15, 33)       | 240 (188, 294)    | 98 (64, 136)   | 1.2 (0.8, 1.6)    | 12.3 (10.4, 14.2) | 5 (3.5, 6.4)   |
| All               | 352397   | 696   | 8.2 (6.9, 9.4)    | 4.7 (3.9, 5.6)  | 1.1 (0.8, 1.3) | 8 (5, 11)         | 81 (64, 97)       | 34 (23, 47)       | 21 (15, 31)       | 228 (182, 274)    | 95 (65, 134)   | 1.1 (0.8, 1.3)    | 11.6 (10.3, 12.9) | 4.8 (3.8, 5.8) |
| <b>Macedonia</b>  |          |       |                   |                 |                |                   |                   |                   |                   |                   |                |                   |                   |                |
| Age 25-69         | 1222759  | 1395  | 16.7 (15.6, 17.9) | 9.9 (9.1, 10.8) | 1 (0.9, 1)     | 83 (59, 113)      | 83 (59, 113)      | 77 (65, 89)       | 68 (48, 93)       | 68 (48, 93)       | 63 (53, 73)    | 6 (4.6, 7.3)      | 6 (4.6, 7.4)      | 5.5 (4.9, 6.1) |
| Age 70+           | 161830   | 3078  | 16.6 (14.6, 18.8) | 9.6 (8.3, 10.9) | 0.9 (0.8, 1)   | 134 (88, 197)     | 134 (88, 197)     | 106 (86, 128)     | 826 (545, 1220)   | 826 (545, 1220)   | 658 (533, 794) | 4.4 (2.7, 6)      | 4.3 (2.6, 6)      | 3.5 (2.7, 4.1) |
| Female            | 702247   | 2058  | 16.8 (13.2, 20.5) | 10 (7.6, 12.4)  | 1 (0.6, 1.3)   | 91 (56, 135)      | 91 (56, 135)      | 81 (64, 99)       | 129 (79, 192)     | 129 (79, 192)     | 115 (92, 141)  | 4.4 (3.2, 5.7)    | 4.4 (3.1, 5.7)    | 3.9 (3.3, 4.5) |
| Male              | 682342   | 2422  | 16.5 (12.9, 20.1) | 9.7 (7.4, 12.1) | 0.9 (0.6, 1.3) | 127 (86, 175)     | 127 (86, 175)     | 102 (86, 121)     | 186 (126, 257)    | 186 (126, 257)    | 150 (126, 178) | 5.2 (3.5, 6.7)    | 5.2 (3.7, 6.7)    | 4.2 (3.6, 4.9) |
| All               | 1384589  | 4467  | 16.7 (14.1, 19.2) | 9.9 (8.2, 11.6) | 0.9 (0.7, 1.2) | 217 (163, 283)    | 217 (163, 283)    | 183 (159, 208)    | 157 (117, 204)    | 157 (117, 204)    | 132 (115, 150) | 4.8 (3.8, 5.9)    | 4.9 (3.8, 5.9)    | 4.1 (3.7, 4.5) |
| <b>Madagascar</b> |          |       |                   |                 |                |                   |                   |                   |                   |                   |                |                   |                   |                |
| Age 25-69         | 7275534  | 4839  | 9.6 (8.8, 10.3)   | 4.7 (4.3, 5.1)  | 0.6 (0.5, 0.8) | 82 (61, 109)      | 815 (682, 974)    | 140 (96, 190)     | 11 (8, 15)        | 112 (94, 134)     | 19 (13, 26)    | 1.7 (1.2, 2.1)    | 16.8 (14.6, 19.1) | 2.9 (2, 3.8)   |
| Age 70+           | 403241   | 3884  | 9.5 (8.4, 10.7)   | 4.5 (3.8, 5.1)  | 0.6 (0.4, 0.8) | 40 (25, 60)       | 430 (328, 553)    | 62 (34, 98)       | 99 (63, 148)      | 1068 (813, 1372)  | 155 (84, 243)  | 1 (0.5, 1.5)      | 11.1 (8.7, 13.4)  | 1.6 (0.8, 2.4) |
| Female            | 3890844  | 3854  | 9.6 (7.5, 11.8)   | 4.8 (3.5, 6)    | 0.7 (0.3, 1)   | 52 (36, 73)       | 524 (418, 644)    | 92 (59, 131)      | 13 (9, 19)        | 135 (107, 166)    | 24 (15, 34)    | 1.4 (0.8, 1.9)    | 13.6 (11, 16.1)   | 2.4 (1.4, 3.4) |
| Male              | 3787931  | 4859  | 9.5 (7.4, 11.6)   | 4.6 (3.4, 5.8)  | 0.6 (0.3, 1)   | 70 (48, 96)       | 722 (587, 868)    | 111 (72, 159)     | 19 (13, 25)       | 191 (155, 229)    | 29 (19, 42)    | 1.4 (0.9, 2)      | 14.9 (12.3, 17.5) | 2.3 (1.3, 3.3) |
| All               | 7678775  | 8689  | 9.6 (8.1, 11.1)   | 4.7 (3.8, 5.5)  | 0.6 (0.4, 0.9) | 122 (95, 154)     | 1246 (1074, 1450) | 203 (148, 261)    | 16 (12, 20)       | 162 (140, 189)    | 26 (19, 34)    | 1.4 (1, 1.8)      | 14.3 (12.4, 16.1) | 2.3 (1.6, 3)   |
| <b>Malawi</b>     |          |       |                   |                 |                |                   |                   |                   |                   |                   |                |                   |                   |                |
| Age 25-69         | 4771828  | 2957  | 7.5 (6.9, 8.1)    | 4.3 (4, 4.6)    | 0.6 (0.5, 0.7) | 45 (33, 62)       | 505 (404, 625)    | 75 (49, 108)      | 9 (7, 13)         | 106 (85, 131)     | 16 (10, 23)    | 1.5 (1.1, 1.9)    | 17.1 (14.9, 19.5) | 2.5 (1.7, 3.4) |
| Age 70+           | 265277   | 2339  | 7.5 (6.4, 8.5)    | 4.2 (3.6, 4.7)  | 0.6 (0.4, 0.8) | 23 (15, 36)       | 281 (205, 365)    | 34 (16, 60)       | 88 (56, 136)      | 1058 (772, 1376)  | 129 (61, 225)  | 1 (0.5, 1.4)      | 12 (9.2, 14.7)    | 1.5 (0.7, 2.4) |
| Female            | 2555874  | 2985  | 7.6 (5.9, 9.3)    | 4.3 (3.2, 5.5)  | 0.6 (0.3, 0.9) | 38 (26, 55)       | 432 (331, 559)    | 61 (35, 94)       | 15 (10, 22)       | 169 (130, 219)    | 24 (14, 37)    | 1.3 (0.8, 1.8)    | 14.5 (11.9, 17.4) | 2 (1.1, 2.9)   |
| Male              | 2481231  | 2312  | 7.4 (5.8, 9.1)    | 4.3 (3.1, 5.4)  | 0.6 (0.3, 0.9) | 30 (22, 42)       | 354 (286, 427)    | 48 (30, 71)       | 12 (9, 17)        | 142 (115, 172)    | 19 (12, 28)    | 1.3 (0.8, 1.8)    | 15.3 (12.4, 18.4) | 2.1 (1.1, 3.3) |
| All               | 5037105  | 5306  | 7.5 (6.3, 8.7)    | 4.3 (3.5, 5.1)  | 0.6 (0.4, 0.8) | 68 (53, 89)       | 786 (660, 929)    | 110 (76, 148)     | 14 (10, 18)       | 156 (131, 184)    | 22 (15, 29)    | 1.3 (1, 1.6)      | 14.8 (12.8, 16.8) | 2.1 (1.4, 2.8) |
| <b>Malaysia</b>   |          |       |                   |                 |                |                   |                   |                   |                   |                   |                |                   |                   |                |
| Age 25-69         | 13873407 | 12595 | 20.2 (18.8, 21.7) | 2.8 (2.6, 3)    | 1 (0.9, 1.1)   | 2428 (2046, 2864) | 2428 (2046, 2864) | 762 (603, 936)    | 175 (147, 206)    | 175 (147, 206)    | 55 (43, 67)    | 19.3 (16.9, 21.6) | 19.3 (16.9, 21.5) | 6.1 (5, 7)     |
| Age 70+           | 809084   | 13894 | 20.2 (17.7, 22.8) | 2.7 (2.3, 3.1)  | 0.9 (0.8, 1.1) | 1926 (1534, 2342) | 1926 (1534, 2342) | 528 (390, 687)    | 2381 (1895, 2895) | 2381 (1895, 2895) | 653 (482, 849) | 13.8 (10.7, 16.8) | 13.9 (10.8, 16.8) | 3.8 (2.7, 4.9) |
| Female            | 7304173  | 10145 | 20.7 (16.2, 25.1) | 2.8 (2, 3.6)    | 1 (0.6, 1.4)   | 1572 (1243, 1921) | 1572 (1243, 1921) | 465 (353, 584)    | 215 (170, 263)    | 215 (170, 263)    | 64 (48, 80)    | 15.5 (13, 17.9)   | 15.5 (13, 18)     | 4.6 (3.6, 5.6) |
| Male              | 7378318  | 16321 | 19.9 (15.5, 24.3) | 2.8 (2, 3.5)    | 1 (0.6, 1.4)   | 2782 (2307, 3282) | 2782 (2307, 3282) | 826 (633, 1023)   | 377 (313, 445)    | 377 (313, 445)    | 112 (86, 139)  | 17.1 (14.3, 20)   | 17 (14.4, 19.6)   | 5.1 (3.9, 6.2) |
| All               | 14682491 | 26433 | 20.3 (17.1, 23.4) | 2.8 (2.2, 3.3)  | 1 (0.7, 1.3)   | 4354 (3794, 4991) | 4354 (3794, 4991) | 1291 (1071, 1513) | 297 (258, 340)    | 297 (258, 340)    | 88 (73, 103)   | 16.5 (14.5, 18.3) | 16.5 (14.5, 18.4) | 4.9 (4.1, 5.6) |
| <b>Maldives</b>   |          |       |                   |                 |                |                   |                   |                   |                   |                   |                |                   |                   |                |
| Age 25-69         | 143929   | 30    | 18.5 (17, 20)     | 1.6 (1.3, 1.9)  | 1.1 (0.9, 1.3) | 5 (4, 6)          | 6 (5, 8)          | 2 (1, 3)          | 35 (28, 42)       | 43 (35, 52)       | 14 (9, 19)     | 17.1 (15, 19.4)   | 21.1 (18.4, 23.6) | 6.6 (4.9, 8.3) |
| Age 70+           | 10651    | 73    | 18.4 (16, 20.7)   | 1.5 (1.1, 1.9)  | 1 (0.7, 1.3)   | 9 (7, 11)         | 11 (8, 14)        | 3 (2, 5)          | 860 (650, 1077)   | 1047 (793, 1310)  | 291 (177, 429) | 12.6 (10, 15.1)   | 15.2 (11.9, 18.4) | 4.2 (2.3, 6.2) |
| Female            | 77851    | 37    | 18.8 (14.7, 22.9) | 1.6 (1.1, 2.2)  | 1.1 (0.7, 1.5) | 5 (4, 7)          | 6 (5, 8)          | 2 (1, 3)          | 68 (51, 86)       | 80 (60, 101)      | 24 (13, 35)    | 14.2 (11.7, 16.6) | 16.7 (13.9, 19.6) | 5 (3.1, 7)     |
| Male              | 76729    | 66    | 18.2 (14.2, 22.2) | 1.5 (1, 2)      | 1 (0.7, 1.4)   | 9 (7, 11)         | 11 (9, 14)        | 3 (2, 5)          | 117 (89, 146)     | 146 (112, 182)    | 42 (27, 59)    | 13.7 (11.4, 16)   | 17.1 (14, 19.8)   | 4.9 (3.2, 6.6) |

|                         |          |       |                   |                |                |                 |                     |                      |                  |                   |                   |                   |                   |                   |
|-------------------------|----------|-------|-------------------|----------------|----------------|-----------------|---------------------|----------------------|------------------|-------------------|-------------------|-------------------|-------------------|-------------------|
| All                     | 154580   | 102   | 18.5 (15.7, 21.4) | 1.6 (1.2, 2)   | 1.1 (0.8, 1.4) | 14 (12, 17)     | 17 (14, 20)         | 5 (4, 7)             | 92 (76, 108)     | 113 (93, 132)     | 33 (24, 43)       | 13.9 (12.2, 15.4) | 17 (15, 18.9)     | 5 (3.6, 6.3)      |
| <b>Mali</b>             |          |       |                   |                |                |                 |                     |                      |                  |                   |                   |                   |                   |                   |
| Age 25-69               | 4916583  | 2112  | 9.2 (8.4, 9.9)    | 3.9 (3.6, 4.2) | 0.8 (0.6, 1)   | 31 (23, 42)     | 382 (311, 457)      | 93 (65, 126)         | 6 (5, 9)         | 78 (63, 93)       | 19 (13, 26)       | 1.5 (1, 1.9)      | 18.1 (15.8, 20.5) | 4.4 (3, 5.7)      |
| Age 70+                 | 173436   | 1381  | 9.1 (7.8, 10.3)   | 3.8 (3.2, 4.4) | 0.7 (0.5, 1)   | 13 (8, 20)      | 175 (126, 226)      | 37 (19, 59)          | 75 (46, 118)     | 1007 (724, 1305)  | 212 (109, 339)    | 0.9 (0.5, 1.4)    | 12.6 (9.8, 15.5)  | 2.7 (1.2, 4.1)    |
| Female                  | 2652702  | 2314  | 9.3 (7.2, 11.3)   | 3.9 (2.9, 5)   | 0.8 (0.4, 1.2) | 29 (19, 41)     | 364 (285, 451)      | 86 (57, 122)         | 11 (7, 15)       | 137 (107, 170)    | 32 (22, 46)       | 1.2 (0.8, 1.7)    | 15.8 (12.9, 18.5) | 3.7 (2.3, 5.2)    |
| Male                    | 2437317  | 1175  | 9 (7.1, 11)       | 3.8 (2.8, 4.8) | 0.8 (0.4, 1.1) | 15 (11, 21)     | 193 (155, 233)      | 44 (30, 62)          | 6 (4, 9)         | 79 (64, 96)       | 18 (12, 25)       | 1.3 (0.7, 1.8)    | 16.4 (13.5, 19.4) | 3.8 (2.1, 5.4)    |
| All                     | 5090019  | 3497  | 9.2 (7.7, 10.6)   | 3.9 (3.1, 4.6) | 0.8 (0.5, 1)   | 44 (33, 57)     | 557 (469, 651)      | 130 (98, 170)        | 9 (7, 11)        | 109 (92, 128)     | 26 (19, 33)       | 1.3 (0.9, 1.6)    | 15.9 (13.8, 18)   | 3.7 (2.6, 4.8)    |
| <b>Malta</b>            |          |       |                   |                |                |                 |                     |                      |                  |                   |                   |                   |                   |                   |
| Age 25-69               | 253235   | 151   | 9 (8.4, 9.7)      | 4.2 (3.9, 4.5) | 0.9 (0.7, 1)   | 2 (1, 3)        | 24 (19, 29)         | 7 (4, 10)            | 8 (6, 12)        | 96 (76, 114)      | 27 (17, 39)       | 1.4 (1, 1.7)      | 16.1 (14.2, 17.9) | 4.6 (3.4, 5.8)    |
| Age 70+                 | 41738    | 666   | 9 (7.9, 10.2)     | 4 (3.5, 4.6)   | 0.8 (0.6, 1.1) | 6 (4, 9)        | 77 (59, 96)         | 20 (11, 32)          | 146 (89, 226)    | 1834 (1402, 2307) | 486 (256, 767)    | 0.9 (0.5, 1.3)    | 11.5 (8.9, 14.1)  | 3 (1.5, 4.5)      |
| Female                  | 150661   | 353   | 9.1 (7.1, 11.1)   | 4.2 (3.1, 5.3) | 0.9 (0.5, 1.2) | 3 (2, 6)        | 41 (28, 55)         | 11 (5, 21)           | 22 (12, 40)      | 273 (185, 368)    | 76 (31, 138)      | 0.9 (0.6, 1.2)    | 11.7 (10, 13.4)   | 3.3 (2.3, 4.3)    |
| Male                    | 144312   | 466   | 9 (7, 10.9)       | 4.1 (3.1, 5.2) | 0.8 (0.5, 1.2) | 5 (3, 7)        | 60 (46, 74)         | 16 (9, 24)           | 33 (22, 52)      | 414 (321, 515)    | 109 (64, 166)     | 1 (0.7, 1.3)      | 12.8 (10.9, 14.8) | 3.4 (2.2, 4.5)    |
| All                     | 294973   | 819   | 9 (7.6, 10.4)     | 4.2 (3.4, 5)   | 0.9 (0.6, 1.1) | 8 (6, 11)       | 101 (82, 121)       | 27 (17, 39)          | 28 (19, 39)      | 342 (277, 411)    | 92 (59, 133)      | 1 (0.8, 1.2)      | 12.3 (10.9, 13.6) | 3.3 (2.6, 4.1)    |
| <b>Marshall Islands</b> |          |       |                   |                |                |                 |                     |                      |                  |                   |                   |                   |                   |                   |
| Age 25-69               | 25797    | 26    | 22.9 (21.1, 24.6) | 2.2 (2, 2.4)   | 1.3 (1, 1.6)   | 6 (5, 7)        | 6 (5, 7)            | 3 (2, 4)             | 221 (175, 272)   | 221 (175, 272)    | 98 (64, 138)      | 22.4 (19.7, 25.2) | 22.3 (19.7, 25)   | 10 (7, 13)        |
| Age 70+                 | 1050     | 8     | 22.8 (20.1, 25.7) | 2.1 (1.8, 2.4) | 1.2 (0.7, 1.7) | 1 (1, 2)        | 1 (1, 2)            | 0 (0, 1)             | 1162 (775, 1611) | 1162 (775, 1611)  | 450 (211, 753)    | 14.8 (11.5, 17.9) | 15 (11.9, 18.3)   | 5.7 (2.8, 9)      |
| Female                  | 13454    | 9     | 23.1 (18.1, 28.1) | 2.2 (1.5, 2.9) | 1.2 (0.8, 1.7) | 2 (1, 2)        | 2 (1, 2)            | 1 (0, 1)             | 134 (102, 172)   | 134 (102, 172)    | 58 (37, 83)       | 19.3 (16.2, 22.5) | 19.2 (16.1, 22.6) | 8.4 (5.3, 11.7)   |
| Male                    | 13393    | 24    | 22.6 (17.6, 27.6) | 2.2 (1.5, 2.8) | 1.2 (0.8, 1.7) | 5 (4, 6)        | 5 (4, 6)            | 2 (1, 3)             | 382 (291, 480)   | 382 (291, 480)    | 167 (101, 247)    | 21 (17.4, 24.2)   | 21 (17.5, 24.7)   | 9.2 (5.1, 12.9)   |
| All                     | 26847    | 34    | 22.9 (19.4, 26.4) | 2.2 (1.7, 2.7) | 1.3 (0.9, 1.6) | 7 (6, 8)        | 7 (6, 8)            | 3 (2, 4)             | 258 (210, 313)   | 258 (210, 313)    | 112 (77, 153)     | 20.6 (18.1, 23.1) | 20.6 (18.2, 23)   | 8.9 (6.2, 11.5)   |
| <b>Mauritania</b>       |          |       |                   |                |                |                 |                     |                      |                  |                   |                   |                   |                   |                   |
| Age 25-69               | 1339150  | 530   | 13.1 (12.1, 14.1) | 3.8 (3.5, 4.1) | 0.8 (0.6, 0.9) | 37 (30, 46)     | 96 (78, 115)        | 22 (15, 30)          | 28 (22, 35)      | 72 (58, 86)       | 17 (11, 22)       | 7.1 (5.9, 8.3)    | 18.1 (15.8, 20.5) | 4.2 (2.9, 5.4)    |
| Age 70+                 | 49433    | 321   | 13 (11.3, 14.8)   | 3.7 (3.1, 4.2) | 0.7 (0.5, 1)   | 16 (11, 21)     | 41 (30, 53)         | 8 (4, 13)            | 316 (223, 421)   | 823 (605, 1069)   | 167 (86, 268)     | 4.9 (3.4, 6.4)    | 12.7 (9.6, 15.6)  | 2.6 (1, 4)        |
| Female                  | 703410   | 450   | 13.3 (10.4, 16.2) | 3.8 (2.8, 4.9) | 0.8 (0.4, 1.1) | 29 (22, 37)     | 70 (53, 86)         | 16 (10, 23)          | 41 (31, 52)      | 99 (76, 123)      | 23 (14, 33)       | 6.4 (5.1, 7.8)    | 15.5 (12.8, 18.2) | 3.6 (2.1, 5)      |
| Male                    | 685173   | 398   | 12.9 (10, 15.7)   | 3.8 (2.8, 4.8) | 0.8 (0.4, 1.1) | 24 (19, 30)     | 67 (54, 81)         | 14 (9, 20)           | 35 (28, 44)      | 98 (79, 119)      | 21 (14, 29)       | 6 (4.6, 7.6)      | 16.8 (13.9, 19.9) | 3.6 (2.1, 5.1)    |
| All                     | 1388583  | 847   | 13.1 (11, 15.1)   | 3.8 (3.1, 4.5) | 0.8 (0.5, 1)   | 53 (43, 63)     | 136 (114, 158)      | 30 (22, 40)          | 38 (31, 45)      | 98 (82, 114)      | 22 (16, 28)       | 6.2 (5.2, 7.2)    | 16.1 (13.9, 18.2) | 3.6 (2.6, 4.6)    |
| <b>Mauritius</b>        |          |       |                   |                |                |                 |                     |                      |                  |                   |                   |                   |                   |                   |
| Age 25-69               | 742690   | 735   | 14.3 (13.1, 15.4) | 7.3 (6.6, 8)   | 0.6 (0.5, 0.8) | 70 (54, 88)     | 81 (62, 101)        | 20 (10, 31)          | 94 (72, 119)     | 109 (84, 136)     | 26 (13, 42)       | 9.5 (7.9, 11.3)   | 11 (9.1, 12.9)    | 2.7 (1.8, 3.6)    |
| Age 70+                 | 55677    | 1098  | 14.3 (12.5, 16.3) | 7 (5.8, 8.3)   | 0.6 (0.3, 0.8) | 73 (48, 102)    | 83 (56, 114)        | 17 (7, 32)           | 1303 (854, 1826) | 1490 (1006, 2046) | 304 (123, 575)    | 6.6 (4.4, 8.7)    | 7.6 (5.4, 9.8)    | 1.5 (0.6, 2.5)    |
| Female                  | 410862   | 812   | 14.5 (11.4, 17.7) | 7.4 (5.6, 9.2) | 0.6 (0.3, 1)   | 62 (41, 89)     | 66 (44, 94)         | 15 (6, 30)           | 150 (99, 217)    | 161 (107, 229)    | 38 (14, 72)       | 7.6 (5.9, 9.3)    | 8.2 (6.2, 10)     | 1.9 (1, 2.8)      |
| Male                    | 387505   | 1025  | 14.2 (11, 17.3)   | 7.1 (5.4, 8.9) | 0.6 (0.3, 0.9) | 81 (60, 103)    | 98 (74, 122)        | 21 (11, 33)          | 208 (154, 265)   | 252 (191, 314)    | 54 (29, 86)       | 7.9 (6.1, 9.8)    | 9.5 (7.4, 11.7)   | 2.1 (1, 3.1)      |
| All                     | 798367   | 1836  | 14.3 (12.1, 16.5) | 7.2 (6, 8.5)   | 0.6 (0.4, 0.9) | 143 (112, 178)  | 164 (131, 201)      | 37 (22, 54)          | 179 (141, 223)   | 205 (164, 252)    | 46 (27, 68)       | 7.8 (6.4, 9.1)    | 8.9 (7.5, 10.3)   | 2 (1.3, 2.7)      |
| <b>Mexico</b>           |          |       |                   |                |                |                 |                     |                      |                  |                   |                   |                   |                   |                   |
| Age 25-69               | 54894994 | 26039 | 7.6 (7.5, 7.8)    | 4.6 (4.5, 4.7) | 3.6 (3.4, 3.8) | 381 (316, 454)  | 4270 (3626, 4958)   | 8299 (7421, 9292)    | 7 (6, 8)         | 78 (66, 90)       | 151 (135, 169)    | 1.5 (1.2, 1.7)    | 16.4 (14.5, 18.6) | 31.9 (29.6, 34.5) |
| Age 70+                 | 4747742  | 52288 | 7.6 (7.4, 7.8)    | 4.4 (4.3, 4.6) | 3.3 (3, 3.6)   | 471 (347, 612)  | 5732 (4351, 7143)   | 10433 (8558, 12344)  | 99 (73, 129)     | 1207 (916, 1504)  | 2197 (1803, 2600) | 0.9 (0.7, 1.1)    | 11 (8.8, 13.1)    | 20 (17.5, 22.6)   |
| Female                  | 30813361 | 34889 | 7.7 (6, 9.4)      | 4.7 (3.4, 5.9) | 3.6 (2.8, 4.4) | 360 (262, 472)  | 4205 (3140, 5342)   | 7923 (6470, 9413)    | 12 (9, 15)       | 136 (102, 173)    | 257 (210, 305)    | 1 (0.8, 1.2)      | 12.1 (10, 14)     | 22.6 (20.2, 24.8) |
| Male                    | 28829375 | 43269 | 7.6 (5.9, 9.2)    | 4.5 (3.4, 5.7) | 3.5 (2.7, 4.4) | 492 (389, 597)  | 5797 (4718, 6844)   | 10809 (9400, 12320)  | 17 (13, 21)      | 201 (164, 237)    | 375 (326, 427)    | 1.1 (0.9, 1.4)    | 13.4 (11.4, 15.6) | 25 (22.3, 27.7)   |
| All                     | 59642736 | 78142 | 7.6 (6.4, 8.8)    | 4.6 (3.8, 5.5) | 3.6 (3, 4.2)   | 852 (715, 1008) | 10002 (8492, 11596) | 18732 (16656, 20786) | 14 (12, 17)      | 168 (142, 194)    | 314 (279, 349)    | 1.1 (0.9, 1.2)    | 12.8 (11.3, 14.3) | 23.9 (22.2, 25.6) |
| <b>Moldova</b>          |          |       |                   |                |                |                 |                     |                      |                  |                   |                   |                   |                   |                   |

|                   |          |       |                   |                |                |                   |                   |                  |                   |                   |                  |                  |                   |                |
|-------------------|----------|-------|-------------------|----------------|----------------|-------------------|-------------------|------------------|-------------------|-------------------|------------------|------------------|-------------------|----------------|
| Age 25-69         | 2055981  | 4144  | 11 (10.2, 11.8)   | 7.3 (6.7, 7.8) | 0.9 (0.8, 1.1) | 130 (94, 177)     | 436 (348, 535)    | 219 (149, 298)   | 63 (46, 86)       | 212 (169, 260)    | 107 (73, 145)    | 3.1 (2.4, 3.9)   | 10.5 (8.9, 12.2)  | 5.3 (4, 6.5)   |
| Age 70+           | 278143   | 12349 | 11 (9.5, 12.5)    | 7 (6.1, 8)     | 0.9 (0.6, 1.1) | 287 (177, 438)    | 936 (682, 1211)   | 410 (229, 617)   | 1031 (638, 1575)  | 3364 (2453, 4356) | 1474 (823, 2217) | 2.3 (1.3, 3.3)   | 7.6 (5.6, 9.5)    | 3.3 (1.9, 4.9) |
| Female            | 1263142  | 8921  | 11.2 (8.7, 13.6)  | 7.3 (5.5, 9)   | 0.9 (0.5, 1.3) | 230 (136, 364)    | 700 (472, 950)    | 322 (167, 510)   | 182 (107, 288)    | 554 (374, 752)    | 255 (132, 404)   | 2.6 (1.8, 3.3)   | 7.8 (6.2, 9.5)    | 3.6 (2.4, 4.7) |
| Male              | 1070982  | 7579  | 10.9 (8.5, 13.2)  | 7.1 (5.4, 8.9) | 0.9 (0.5, 1.3) | 187 (127, 265)    | 672 (523, 836)    | 307 (196, 427)   | 175 (119, 247)    | 627 (488, 780)    | 287 (183, 399)   | 2.5 (1.6, 3.3)   | 8.9 (7, 10.6)     | 4.1 (2.7, 5.4) |
| All               | 2334124  | 16504 | 11 (9.3, 12.7)    | 7.2 (5.9, 8.4) | 0.9 (0.6, 1.2) | 417 (300, 575)    | 1372 (1109, 1669) | 630 (438, 855)   | 179 (129, 247)    | 588 (475, 715)    | 270 (188, 366)   | 2.5 (2, 3.1)     | 8.3 (7.1, 9.4)    | 3.8 (2.9, 4.7) |
| <b>Mongolia</b>   |          |       |                   |                |                |                   |                   |                  |                   |                   |                  |                  |                   |                |
| Age 25-69         | 1329364  | 2081  | 14.4 (13.3, 15.5) | 6.1 (5.6, 6.7) | 0.9 (0.7, 1)   | 210 (167, 259)    | 288 (235, 345)    | 110 (78, 144)    | 158 (126, 195)    | 217 (177, 260)    | 83 (59, 108)     | 10.1 (8.4, 11.9) | 13.8 (11.7, 16)   | 5.3 (3.8, 6.8) |
| Age 70+           | 70362    | 2421  | 14.3 (12.4, 16.4) | 5.9 (5.1, 6.7) | 0.8 (0.6, 1)   | 161 (116, 214)    | 222 (164, 284)    | 70 (39, 105)     | 2281 (1643, 3036) | 3148 (2331, 4040) | 991 (560, 1490)  | 6.7 (4.8, 8.5)   | 9.1 (6.8, 11.4)   | 2.9 (1.5, 4.4) |
| Female            | 723219   | 1926  | 14.6 (11.4, 17.8) | 6.1 (4.6, 7.7) | 0.9 (0.5, 1.2) | 157 (117, 201)    | 203 (155, 256)    | 72 (45, 105)     | 217 (162, 278)    | 281 (214, 354)    | 99 (62, 145)     | 8.2 (6.4, 10)    | 10.6 (8.4, 12.8)  | 3.7 (2.3, 5.2) |
| Male              | 676507   | 2568  | 14.1 (11, 17.2)   | 6.1 (4.6, 7.6) | 0.9 (0.5, 1.2) | 214 (168, 266)    | 306 (247, 370)    | 108 (74, 148)    | 316 (249, 394)    | 452 (365, 546)    | 160 (109, 218)   | 8.3 (6.3, 10.3)  | 11.9 (9.6, 14.2)  | 4.2 (2.6, 5.9) |
| All               | 1399726  | 4498  | 14.4 (12.1, 16.6) | 6.1 (5, 7.2)   | 0.9 (0.6, 1.1) | 371 (310, 438)    | 509 (433, 593)    | 180 (136, 229)   | 265 (222, 313)    | 364 (310, 424)    | 129 (97, 163)    | 8.2 (6.9, 9.5)   | 11.3 (9.8, 12.7)  | 4 (2.9, 5.1)   |
| <b>Montenegro</b> |          |       |                   |                |                |                   |                   |                  |                   |                   |                  |                  |                   |                |
| Age 25-69         | 361406   | 391   | 8.8 (8.1, 9.5)    | 5.6 (5.2, 6.1) | 1.1 (0.9, 1.3) | 7 (5, 10)         | 55 (44, 67)       | 28 (19, 38)      | 20 (13, 28)       | 153 (122, 185)    | 78 (53, 105)     | 1.8 (1.3, 2.3)   | 14.1 (12.2, 16)   | 7.2 (5.5, 8.7) |
| Age 70+           | 57034    | 877   | 8.8 (7.7, 10)     | 5.4 (4.6, 6.2) | 1 (0.8, 1.3)   | 10 (6, 17)        | 86 (62, 110)      | 39 (23, 57)      | 178 (107, 293)    | 1509 (1085, 1935) | 692 (403, 1001)  | 1.2 (0.6, 1.7)   | 9.8 (7.5, 12.1)   | 4.5 (2.7, 6.2) |
| Female            | 218523   | 390   | 8.9 (7, 10.9)     | 5.7 (4.2, 7.1) | 1.1 (0.7, 1.5) | 5 (3, 8)          | 41 (29, 53)       | 20 (12, 29)      | 23 (14, 39)       | 186 (135, 244)    | 91 (55, 133)     | 1.3 (0.8, 1.7)   | 10.4 (8.8, 12.1)  | 5.1 (3.7, 6.5) |
| Male              | 199917   | 880   | 8.7 (6.8, 10.7)   | 5.5 (4.1, 6.9) | 1.1 (0.7, 1.5) | 12 (8, 18)        | 101 (78, 123)     | 48 (32, 65)      | 61 (40, 91)       | 504 (390, 614)    | 238 (163, 326)   | 1.4 (1, 1.9)     | 11.4 (9.6, 13.5)  | 5.4 (3.8, 7.1) |
| All               | 418440   | 1269  | 8.8 (7.5, 10.2)   | 5.6 (4.6, 6.6) | 1.1 (0.8, 1.4) | 17 (12, 24)       | 141 (116, 167)    | 68 (48, 87)      | 41 (29, 58)       | 338 (276, 399)    | 161 (115, 208)   | 1.4 (1.1, 1.7)   | 11.1 (9.9, 12.4)  | 5.3 (4.2, 6.4) |
| <b>Morocco</b>    |          |       |                   |                |                |                   |                   |                  |                   |                   |                  |                  |                   |                |
| Age 25-69         | 15599774 | 7424  | 9 (8.3, 9.7)      | 6.5 (6, 7)     | 1 (1, 1.1)     | 154 (110, 208)    | 949 (769, 1146)   | 488 (406, 574)   | 10 (7, 13)        | 61 (49, 73)       | 31 (26, 37)      | 2.1 (1.5, 2.6)   | 12.8 (10.9, 14.6) | 6.6 (5.7, 7.4) |
| Age 70+           | 1134436  | 10108 | 8.9 (7.8, 10.1)   | 6.2 (5.4, 7.1) | 0.9 (0.9, 1)   | 130 (82, 206)     | 884 (646, 1138)   | 398 (310, 501)   | 115 (72, 182)     | 779 (570, 1003)   | 351 (273, 442)   | 1.3 (0.7, 1.9)   | 8.7 (6.6, 10.9)   | 3.9 (3.1, 4.7) |
| Female            | 8771753  | 8010  | 9.1 (7.1, 11.1)   | 6.5 (4.9, 8.1) | 1 (0.6, 1.4)   | 126 (84, 189)     | 809 (611, 1057)   | 400 (321, 493)   | 14 (10, 22)       | 92 (70, 121)      | 46 (37, 56)      | 1.6 (1, 2.1)     | 10.1 (8.1, 12)    | 5 (4.2, 5.8)   |
| Male              | 7962457  | 9611  | 8.8 (6.9, 10.8)   | 6.4 (4.8, 8)   | 1 (0.6, 1.4)   | 159 (109, 229)    | 1024 (798, 1295)  | 486 (390, 584)   | 20 (14, 29)       | 129 (100, 163)    | 61 (49, 73)      | 1.7 (1.1, 2.3)   | 10.7 (8.6, 12.8)  | 5.1 (4.2, 5.9) |
| All               | 16734210 | 17521 | 9 (7.6, 10.4)     | 6.5 (5.3, 7.6) | 1 (0.7, 1.3)   | 284 (216, 376)    | 1832 (1531, 2185) | 886 (763, 1025)  | 17 (13, 22)       | 110 (91, 131)     | 53 (46, 61)      | 1.6 (1.2, 2.1)   | 10.5 (9, 11.9)    | 5 (4.4, 5.7)   |
| <b>Mozambique</b> |          |       |                   |                |                |                   |                   |                  |                   |                   |                  |                  |                   |                |
| Age 25-69         | 8020615  | 1729  | 12.6 (11.6, 13.6) | 4.7 (4.3, 5.1) | 0.6 (0.5, 0.7) | 101 (77, 127)     | 277 (226, 333)    | 41 (27, 57)      | 13 (10, 16)       | 35 (28, 42)       | 5 (3, 7)         | 5.9 (4.8, 6.9)   | 16 (14, 18.1)     | 2.4 (1.6, 3.2) |
| Age 70+           | 451275   | 1811  | 12.6 (10.9, 14.3) | 4.5 (3.9, 5.2) | 0.6 (0.4, 0.7) | 75 (52, 102)      | 205 (153, 264)    | 26 (12, 41)      | 166 (116, 226)    | 454 (339, 585)    | 57 (27, 91)      | 4.1 (2.8, 5.4)   | 11.3 (8.5, 14.2)  | 1.4 (0.6, 2.2) |
| Female            | 4566220  | 1819  | 12.7 (9.9, 15.5)  | 4.7 (3.5, 6)   | 0.6 (0.3, 0.9) | 90 (66, 118)      | 235 (180, 296)    | 33 (19, 51)      | 20 (15, 26)       | 51 (40, 65)       | 7 (4, 11)        | 4.9 (3.7, 6.1)   | 12.9 (10.7, 15.2) | 1.8 (1, 2.6)   |
| Male              | 3905670  | 1721  | 12.4 (9.7, 15.2)  | 4.6 (3.4, 5.8) | 0.6 (0.3, 0.9) | 86 (65, 110)      | 247 (195, 300)    | 34 (21, 49)      | 22 (17, 28)       | 63 (50, 77)       | 9 (5, 13)        | 5 (3.7, 6.2)     | 14.3 (11.5, 16.9) | 2 (1, 2.9)     |
| All               | 8471890  | 3545  | 12.6 (10.6, 14.6) | 4.7 (3.8, 5.6) | 0.6 (0.4, 0.8) | 176 (143, 212)    | 482 (404, 560)    | 66 (46, 88)      | 21 (17, 25)       | 57 (48, 66)       | 8 (5, 10)        | 5 (4.1, 5.9)     | 13.6 (11.8, 15.3) | 1.9 (1.2, 2.5) |
| <b>Myanmar</b>    |          |       |                   |                |                |                   |                   |                  |                   |                   |                  |                  |                   |                |
| Age 25-69         | 25184279 | 12560 | 15.2 (14, 16.3)   | 5.7 (5.2, 6.3) | 0.9 (0.7, 1)   | 1392 (998, 1808)  | 1736 (1256, 2250) | 592 (384, 845)   | 55 (40, 72)       | 69 (50, 89)       | 24 (15, 34)      | 11.1 (9.5, 12.8) | 13.8 (11.9, 15.6) | 4.7 (3.5, 5.9) |
| Age 70+           | 1527791  | 14828 | 15.1 (13.1, 17.1) | 5.5 (4.6, 6.3) | 0.8 (0.6, 1)   | 1147 (772, 1626)  | 1418 (981, 1965)  | 429 (243, 654)   | 751 (505, 1064)   | 928 (642, 1286)   | 281 (159, 428)   | 7.8 (5.9, 9.7)   | 9.6 (7.1, 11.9)   | 2.9 (1.7, 4.1) |
| Female            | 13770366 | 15146 | 15.4 (12, 18.7)   | 5.8 (4.3, 7.2) | 0.9 (0.5, 1.2) | 1401 (1004, 1882) | 1665 (1199, 2228) | 548 (320, 808)   | 102 (73, 137)     | 121 (87, 162)     | 40 (23, 59)      | 9.3 (7.4, 11.1)  | 11 (9, 13.1)      | 3.6 (2.3, 4.8) |
| Male              | 12941704 | 12060 | 14.9 (11.6, 18.2) | 5.6 (4.2, 7)   | 0.8 (0.5, 1.2) | 1137 (777, 1546)  | 1489 (1034, 2002) | 474 (288, 697)   | 88 (60, 119)      | 115 (80, 155)     | 37 (22, 54)      | 9.4 (7.3, 11.3)  | 12.3 (9.9, 14.5)  | 3.9 (2.6, 5.4) |
| All               | 26712070 | 27243 | 15.2 (12.8, 17.5) | 5.7 (4.7, 6.7) | 0.9 (0.6, 1.1) | 2538 (2004, 3166) | 3154 (2490, 3894) | 1021 (725, 1359) | 95 (75, 119)      | 118 (93, 146)     | 38 (27, 51)      | 9.4 (8, 10.8)    | 11.6 (10.1, 13.1) | 3.8 (2.7, 4.7) |
| <b>Namibia</b>    |          |       |                   |                |                |                   |                   |                  |                   |                   |                  |                  |                   |                |
| Age 25-69         | 918786   | 404   | 8.7 (7.9, 9.4)    | 3.6 (3.3, 3.9) | 0.8 (0.6, 0.9) | 5 (4, 7)          | 73 (59, 90)       | 16 (10, 23)      | 6 (4, 8)          | 80 (64, 98)       | 17 (11, 25)      | 1.3 (1, 1.7)     | 18.1 (15.7, 20.6) | 3.9 (2.7, 5.2) |
| Age 70+           | 49755    | 394   | 8.6 (7.5, 9.7)    | 3.5 (3, 4)     | 0.7 (0.5, 0.9) | 3 (2, 5)          | 50 (37, 64)       | 10 (5, 16)       | 68 (43, 100)      | 1002 (744, 1289)  | 191 (98, 315)    | 0.9 (0.5, 1.2)   | 12.6 (9.8, 15.4)  | 2.4 (1, 3.8)   |

|                    |          |       |                   |                |                |                   |                   |                   |                 |                   |                  |                 |                   |                   |
|--------------------|----------|-------|-------------------|----------------|----------------|-------------------|-------------------|-------------------|-----------------|-------------------|------------------|-----------------|-------------------|-------------------|
| Female             | 496327   | 352   | 8.8 (6.8, 10.7)   | 3.7 (2.7, 4.6) | 0.8 (0.4, 1.1) | 4 (2, 5)          | 51 (39, 66)       | 11 (6, 17)        | 7 (5, 11)       | 103 (79, 132)     | 22 (12, 35)      | 1 (0.7, 1.4)    | 14.6 (12.2, 17.1) | 3.1 (1.7, 4.6)    |
| Male               | 472214   | 448   | 8.5 (6.7, 10.4)   | 3.6 (2.6, 4.5) | 0.8 (0.4, 1.1) | 5 (3, 7)          | 72 (57, 89)       | 15 (9, 22)        | 11 (7, 15)      | 152 (120, 188)    | 31 (19, 46)      | 1.1 (0.7, 1.6)  | 16.1 (13.4, 19)   | 3.3 (1.8, 4.7)    |
| All                | 968541   | 798   | 8.6 (7.3, 10)     | 3.6 (2.9, 4.3) | 0.8 (0.5, 1)   | 9 (7, 11)         | 123 (103, 144)    | 26 (18, 34)       | 9 (7, 12)       | 127 (106, 149)    | 26 (18, 35)      | 1.1 (0.8, 1.4)  | 15.4 (13.7, 17.3) | 3.2 (2.2, 4.2)    |
| <b>Nepal</b>       |          |       |                   |                |                |                   |                   |                   |                 |                   |                  |                 |                   |                   |
| Age 25-69          | 12187614 | 6053  | 2.7 (2.5, 3)      | 4.4 (4, 4.8)   | 2.5 (2.1, 2.9) | 95 (69, 129)      | 1041 (850, 1260)  | 1366 (1079, 1682) | 8 (6, 11)       | 85 (70, 103)      | 112 (89, 138)    | 1.6 (1.1, 2)    | 17.2 (15, 19.5)   | 22.5 (18.7, 26.3) |
| Age 70+            | 720561   | 5599  | 2.7 (2.4, 3.1)    | 4.2 (3.7, 4.9) | 2.3 (1.7, 3)   | 55 (35, 84)       | 658 (483, 849)    | 812 (543, 1134)   | 77 (48, 116)    | 914 (671, 1178)   | 1127 (753, 1574) | 1 (0.5, 1.4)    | 11.8 (9.2, 14.3)  | 14.4 (10, 18.8)   |
| Female             | 6791888  | 5646  | 2.8 (2.1, 3.4)    | 4.4 (3.3, 5.6) | 2.6 (1.9, 3.2) | 70 (47, 101)      | 789 (596, 1001)   | 1042 (750, 1365)  | 10 (7, 15)      | 116 (88, 147)     | 153 (110, 201)   | 1.2 (0.8, 1.7)  | 14 (11.7, 16.4)   | 18.4 (14, 22.6)   |
| Male               | 6116287  | 6031  | 2.7 (2.1, 3.3)    | 4.3 (3.2, 5.5) | 2.5 (1.8, 3.1) | 80 (56, 108)      | 910 (736, 1102)   | 1136 (863, 1411)  | 13 (9, 18)      | 149 (120, 180)    | 186 (141, 231)   | 1.3 (0.8, 1.8)  | 15.1 (12.4, 17.9) | 18.7 (14.3, 23.4) |
| All                | 12908175 | 11654 | 2.7 (2.3, 3.2)    | 4.4 (3.6, 5.2) | 2.5 (2.1, 3)   | 150 (115, 190)    | 1699 (1427, 1971) | 2178 (1789, 2611) | 12 (9, 15)      | 132 (111, 153)    | 169 (139, 202)   | 1.3 (1, 1.6)    | 14.6 (12.8, 16.4) | 18.7 (15.8, 21.6) |
| <b>Netherlands</b> |          |       |                   |                |                |                   |                   |                   |                 |                   |                  |                 |                   |                   |
| Age 25-69          | 9863084  | 3971  | 14.6 (14.3, 14.8) | 6.3 (6.1, 6.5) | 2.4 (2.3, 2.4) | 377 (301, 455)    | 492 (391, 590)    | 782 (670, 898)    | 38 (31, 46)     | 50 (40, 60)       | 79 (68, 91)      | 9.5 (8.2, 10.7) | 12.4 (11, 13.9)   | 19.7 (18.3, 21.1) |
| Age 70+            | 1788833  | 16120 | 14.6 (14.2, 15)   | 6 (5.8, 6.3)   | 2.3 (2.2, 2.4) | 1090 (771, 1460)  | 1396 (994, 1860)  | 2099 (1676, 2555) | 609 (431, 816)  | 780 (556, 1040)   | 1174 (937, 1428) | 6.8 (5.4, 8.2)  | 8.7 (6.7, 10.5)   | 13.1 (11.5, 14.9) |
| Female             | 5960020  | 9491  | 14.7 (11.5, 17.9) | 6.3 (4.7, 7.9) | 2.4 (1.7, 3)   | 692 (435, 999)    | 847 (537, 1216)   | 1312 (962, 1743)  | 116 (73, 168)   | 142 (90, 204)     | 220 (161, 293)   | 7.3 (6.2, 8.4)  | 8.9 (7.6, 10.3)   | 13.8 (12.5, 15.1) |
| Male               | 5691897  | 10512 | 14.4 (11.2, 17.5) | 6.2 (4.7, 7.8) | 2.3 (1.7, 2.9) | 774 (590, 976)    | 1040 (793, 1306)  | 1569 (1334, 1843) | 136 (104, 172)  | 183 (139, 229)    | 276 (234, 324)   | 7.3 (6.1, 8.5)  | 9.9 (8.4, 11.4)   | 14.9 (13.5, 16.3) |
| All                | 11651917 | 20051 | 14.6 (12.3, 16.8) | 6.3 (5.2, 7.4) | 2.3 (1.9, 2.8) | 1466 (1137, 1851) | 1888 (1482, 2366) | 2881 (2431, 3337) | 126 (98, 159)   | 162 (127, 203)    | 247 (209, 286)   | 7.3 (6.5, 8.1)  | 9.4 (8.4, 10.5)   | 14.4 (13.4, 15.3) |
| <b>New Zealand</b> |          |       |                   |                |                |                   |                   |                   |                 |                   |                  |                 |                   |                   |
| Age 25-69          | 2440528  | 1193  | 14.2 (14, 14.4)   | 5.2 (5.1, 5.3) | 1.2 (1.2, 1.3) | 106 (87, 125)     | 176 (144, 207)    | 100 (85, 115)     | 43 (36, 51)     | 72 (59, 85)       | 41 (35, 47)      | 8.9 (7.8, 10)   | 14.7 (13.2, 16.3) | 8.4 (7.6, 9.2)    |
| Age 70+            | 394801   | 5188  | 14.3 (13.9, 14.6) | 5 (4.8, 5.1)   | 1.1 (1.1, 1.2) | 326 (233, 426)    | 520 (377, 668)    | 265 (211, 329)    | 827 (591, 1078) | 1318 (955, 1691)  | 670 (534, 832)   | 6.3 (5, 7.6)    | 10 (8, 12)        | 5.1 (4.4, 5.9)    |
| Female             | 1476312  | 2977  | 14.4 (11.3, 17.6) | 5.2 (3.9, 6.5) | 1.2 (0.8, 1.7) | 201 (122, 281)    | 304 (188, 419)    | 163 (121, 215)    | 136 (83, 190)   | 206 (128, 284)    | 110 (82, 146)    | 6.8 (5.8, 7.9)  | 10.2 (8.7, 11.7)  | 5.5 (4.8, 6.1)    |
| Male               | 1359017  | 3394  | 14 (10.9, 17.1)   | 5.1 (3.8, 6.4) | 1.2 (0.8, 1.6) | 231 (173, 293)    | 392 (296, 493)    | 202 (167, 241)    | 170 (127, 215)  | 288 (218, 363)    | 149 (123, 178)   | 6.8 (5.7, 7.9)  | 11.5 (9.8, 13.3)  | 6 (5.2, 6.7)      |
| All                | 2835329  | 6370  | 14.2 (12, 16.5)   | 5.1 (4.2, 6.1) | 1.2 (0.9, 1.5) | 432 (332, 535)    | 696 (544, 849)    | 365 (307, 431)    | 152 (117, 189)  | 246 (192, 299)    | 129 (108, 152)   | 6.8 (6.1, 7.5)  | 10.9 (9.8, 12.1)  | 5.7 (5.3, 6.2)    |
| <b>Nicaragua</b>   |          |       |                   |                |                |                   |                   |                   |                 |                   |                  |                 |                   |                   |
| Age 25-69          | 2380857  | 1068  | 7.6 (7.1, 8.2)    | 6.2 (5.7, 6.8) | 1.1 (0.8, 1.3) | 21 (15, 28)       | 138 (114, 161)    | 77 (52, 106)      | 9 (6, 12)       | 58 (48, 67)       | 32 (22, 44)      | 1.9 (1.4, 2.5)  | 12.9 (10.9, 14.9) | 7.2 (5.1, 9.4)    |
| Age 70+            | 174502   | 2939  | 7.6 (6.7, 8.6)    | 6 (5.2, 6.8)   | 1 (0.6, 1.3)   | 36 (22, 57)       | 261 (192, 336)    | 123 (60, 196)     | 205 (123, 324)  | 1493 (1102, 1923) | 702 (345, 1126)  | 1.2 (0.7, 1.8)  | 8.9 (6.7, 11.1)   | 4.2 (2.2, 6.1)    |
| Female             | 1327131  | 1860  | 7.7 (6, 9.4)      | 6.3 (4.7, 7.8) | 1.1 (0.7, 1.5) | 25 (16, 42)       | 177 (127, 233)    | 90 (44, 145)      | 19 (12, 31)     | 134 (96, 175)     | 68 (34, 109)     | 1.4 (0.9, 1.9)  | 9.5 (7.6, 11.5)   | 4.8 (2.8, 6.7)    |
| Male               | 1228228  | 2139  | 7.6 (5.9, 9.3)    | 6.1 (4.6, 7.7) | 1.1 (0.7, 1.5) | 31 (21, 46)       | 221 (173, 275)    | 109 (63, 163)     | 25 (17, 37)     | 180 (141, 224)    | 89 (52, 133)     | 1.5 (0.9, 2)    | 10.3 (8.3, 12.5)  | 5.1 (2.9, 7.3)    |
| All                | 2555359  | 4000  | 7.6 (6.4, 8.8)    | 6.2 (5.1, 7.3) | 1.1 (0.8, 1.4) | 57 (42, 79)       | 398 (330, 475)    | 199 (130, 272)    | 22 (16, 31)     | 156 (129, 186)    | 78 (51, 107)     | 1.4 (1, 1.8)    | 10 (8.5, 11.4)    | 5 (3.5, 6.4)      |
| <b>Niger</b>       |          |       |                   |                |                |                   |                   |                   |                 |                   |                  |                 |                   |                   |
| Age 25-69          | 4924838  | 1853  | 11.2 (10.3, 12)   | 4.3 (4, 4.7)   | 0.8 (0.7, 1)   | 59 (46, 76)       | 316 (262, 376)    | 85 (58, 117)      | 12 (9, 15)      | 64 (53, 76)       | 17 (12, 24)      | 3.2 (2.5, 3.9)  | 17 (14.8, 19.1)   | 4.6 (3.3, 5.9)    |
| Age 70+            | 167246   | 974   | 11.1 (9.6, 12.8)  | 4.2 (3.6, 4.8) | 0.8 (0.5, 1)   | 22 (14, 32)       | 118 (85, 158)     | 29 (15, 45)       | 129 (82, 191)   | 707 (507, 943)    | 175 (92, 270)    | 2.2 (1.3, 3.1)  | 12.1 (9.3, 15.1)  | 3 (1.3, 4.7)      |
| Female             | 2550534  | 1576  | 11.4 (8.9, 13.9)  | 4.4 (3.2, 5.5) | 0.8 (0.5, 1.2) | 48 (35, 65)       | 235 (181, 289)    | 64 (40, 93)       | 19 (14, 26)     | 92 (71, 113)      | 25 (16, 37)      | 3.1 (2.2, 4)    | 14.9 (11.9, 17.8) | 4.1 (2.3, 5.8)    |
| Male               | 2541550  | 1255  | 11 (8.6, 13.4)    | 4.3 (3.2, 5.4) | 0.8 (0.5, 1.2) | 32 (23, 44)       | 199 (157, 244)    | 50 (33, 71)       | 13 (9, 17)      | 78 (62, 96)       | 20 (13, 28)      | 2.6 (1.7, 3.4)  | 15.9 (13.2, 18.5) | 4 (2.4, 5.6)      |
| All                | 5092084  | 2829  | 11.2 (9.5, 12.9)  | 4.3 (3.5, 5.1) | 0.8 (0.6, 1.1) | 81 (64, 101)      | 434 (369, 509)    | 115 (85, 148)     | 16 (13, 20)     | 85 (72, 100)      | 23 (17, 29)      | 2.9 (2.2, 3.5)  | 15.3 (13.5, 17.4) | 4.1 (3, 5.2)      |
| <b>Nigeria</b>     |          |       |                   |                |                |                   |                   |                   |                 |                   |                  |                 |                   |                   |
| Age 25-69          | 56604387 | 15904 | 13.6 (12.6, 14.6) | 4.7 (4.3, 5.1) | 0.9 (0.8, 0.9) | 1277 (997, 1569)  | 2570 (2060, 3097) | 792 (633, 950)    | 23 (18, 28)     | 45 (36, 55)       | 14 (11, 17)      | 8.1 (6.8, 9.4)  | 16.2 (14, 18.4)   | 5 (4.2, 5.7)      |
| Age 70+            | 3073341  | 15297 | 13.5 (11.9, 15.2) | 4.5 (3.9, 5.1) | 0.8 (0.7, 0.9) | 868 (602, 1164)   | 1756 (1274, 2301) | 469 (343, 625)    | 283 (196, 379)  | 571 (415, 749)    | 153 (112, 203)   | 5.6 (4.1, 7.1)  | 11.5 (8.7, 14.2)  | 3 (2.4, 3.8)      |
| Female             | 29884306 | 16673 | 13.8 (10.8, 16.8) | 4.7 (3.5, 5.9) | 0.9 (0.5, 1.3) | 1187 (893, 1547)  | 2257 (1729, 2851) | 675 (518, 843)    | 40 (30, 52)     | 76 (58, 95)       | 23 (17, 28)      | 7.1 (5.6, 8.7)  | 13.5 (11.1, 15.9) | 4 (3.3, 4.8)      |
| Male               | 29793422 | 14591 | 13.3 (10.4, 16.3) | 4.6 (3.4, 5.9) | 0.9 (0.5, 1.2) | 959 (737, 1225)   | 2069 (1628, 2542) | 587 (460, 730)    | 32 (25, 41)     | 69 (55, 85)       | 20 (15, 25)      | 6.6 (5.1, 8.1)  | 14.2 (11.5, 16.8) | 4 (3.2, 4.8)      |



| Country     | Age Group | Population | Life Expectancy (Years) | Infant Mortality Rate (per 1,000 live births) | Maternal Mortality Ratio (per 100,000 live births) | Under-5 Mortality Rate (per 1,000 live births) | Stillbirth Rate (per 1,000 total births) | Crude Birth Rate (per 1,000 population) | Crude Death Rate (per 1,000 population) | Sex Ratio (males per 100 females) | Population Density (per sq km) | Urban Population (%) | Healthcare Expenditure (per capita, USD) | Human Development Index |                   |
|-------------|-----------|------------|-------------------------|-----------------------------------------------|----------------------------------------------------|------------------------------------------------|------------------------------------------|-----------------------------------------|-----------------------------------------|-----------------------------------|--------------------------------|----------------------|------------------------------------------|-------------------------|-------------------|
| Paraguay    | Age 25-69 | 2770455    | 1364                    | 23.2 (21.5, 25)                               | 2.4 (2.2, 2.6)                                     | 1 (0.8, 1.2)                                   | 292 (218, 375)                           | 292 (218, 375)                          | 88 (59, 124)                            | 105 (79, 135)                     | 105 (79, 135)                  | 32 (21, 45)          | 21.3 (18.8, 23.7)                        | 21.4 (18.8, 24)         | 6.4 (4.8, 8.1)    |
|             | Age 70+   | 104250     | 706                     | 23.1 (20.1, 26)                               | 2.4 (2, 2.7)                                       | 0.9 (0.7, 1.2)                                 | 103 (62, 149)                            | 103 (62, 149)                           | 27 (14, 45)                             | 989 (599, 1426)                   | 989 (599, 1426)                | 260 (135, 429)       | 14.6 (11.4, 17.6)                        | 14.6 (11.5, 17.7)       | 3.8 (2.2, 5.7)    |
|             | Female    | 1434438    | 1098                    | 23.5 (18.4, 28.6)                             | 2.5 (1.7, 3.2)                                     | 1 (0.6, 1.4)                                   | 196 (132, 264)                           | 196 (132, 264)                          | 57 (35, 84)                             | 136 (92, 184)                     | 136 (92, 184)                  | 40 (25, 58)          | 17.8 (14.9, 20.7)                        | 17.8 (14.7, 20.9)       | 5.2 (3.4, 7)      |
|             | Male      | 1440267    | 976                     | 22.9 (17.8, 27.9)                             | 2.4 (1.7, 3.1)                                     | 1 (0.6, 1.3)                                   | 199 (145, 265)                           | 199 (145, 265)                          | 58 (37, 86)                             | 138 (101, 184)                    | 138 (101, 184)                 | 40 (26, 60)          | 20.5 (16.9, 24.2)                        | 20.4 (17.1, 23.7)       | 6 (4, 7.9)        |
|             | All       | 2874705    | 2062                    | 23.2 (19.6, 26.8)                             | 2.4 (1.9, 2.9)                                     | 1 (0.7, 1.3)                                   | 395 (311, 484)                           | 395 (311, 484)                          | 115 (82, 153)                           | 137 (108, 168)                    | 137 (108, 168)                 | 40 (29, 53)          | 19.1 (16.7, 21.5)                        | 19.2 (16.7, 21.6)       | 5.6 (4.1, 6.9)    |
| Peru        | Age 25-69 | 2773730    | 1617                    | 7.5 (6.9, 8)                                  | 6.7 (6.2, 7.2)                                     | 1.7 (1.4, 2)                                   | 33 (24, 47)                              | 194 (158, 234)                          | 214 (163, 266)                          | 12 (9, 17)                        | 70 (57, 84)                    | 77 (59, 96)          | 2.1 (1.5, 2.6)                           | 12 (10.2, 13.7)         | 13.2 (10.7, 15.7) |
|             | Age 70+   | 208755     | 2822                    | 7.4 (6.5, 8.4)                                | 6.4 (5.6, 7.3)                                     | 1.6 (1.2, 2)                                   | 37 (22, 57)                              | 234 (170, 302)                          | 234 (158, 319)                          | 176 (108, 272)                    | 1120 (817, 1448)               | 1122 (757, 1527)     | 1.3 (0.8, 1.8)                           | 8.3 (6.3, 10.2)         | 8.3 (5.6, 10.9)   |
|             | Female    | 1490135    | 1995                    | 7.6 (5.9, 9.2)                                | 6.8 (5.1, 8.4)                                     | 1.7 (1.2, 2.3)                                 | 30 (18, 47)                              | 180 (129, 242)                          | 197 (134, 281)                          | 20 (12, 32)                       | 121 (86, 162)                  | 132 (90, 188)        | 1.5 (1, 2)                               | 9 (7.2, 10.9)           | 9.9 (7.2, 12.5)   |
|             | Male      | 1492350    | 2444                    | 7.4 (5.8, 9)                                  | 6.6 (5, 8.3)                                       | 1.6 (1.1, 2.1)                                 | 40 (27, 57)                              | 247 (192, 305)                          | 252 (187, 322)                          | 27 (18, 38)                       | 166 (129, 204)                 | 169 (126, 216)       | 1.6 (1, 2.3)                             | 10.1 (8.1, 12.2)        | 10.3 (7.5, 12.9)  |
|             | All       | 2982485    | 4441                    | 7.5 (6.3, 8.6)                                | 6.7 (5.5, 7.9)                                     | 1.7 (1.3, 2)                                   | 70 (52, 94)                              | 428 (357, 508)                          | 448 (353, 547)                          | 23 (18, 31)                       | 143 (120, 170)                 | 150 (118, 183)       | 1.6 (1.2, 2)                             | 9.6 (8.1, 11.1)         | 10.1 (8.2, 12)    |
| Philippines | Age 25-69 | 13676222   | 3795                    | 6.9 (6.4, 7.5)                                | 4.7 (4.3, 5.1)                                     | 2.3 (2.2, 2.4)                                 | 61 (46, 80)                              | 620 (524, 723)                          | 756 (663, 854)                          | 4 (3, 6)                          | 45 (38, 53)                    | 55 (49, 62)          | 1.6 (1.2, 2)                             | 16.3 (14.2, 18.4)       | 19.9 (18.3, 21.7) |
|             | Age 70+   | 1139730    | 8760                    | 6.9 (5.9, 7.8)                                | 4.5 (4, 5.1)                                       | 2.1 (2, 2.3)                                   | 88 (54, 140)                             | 959 (719, 1224)                         | 1064 (862, 1289)                        | 77 (47, 123)                      | 842 (631, 1074)                | 934 (757, 1131)      | 1 (0.6, 1.4)                             | 11 (8.6, 13.3)          | 12.1 (10.4, 13.9) |
|             | Female    | 7492261    | 6171                    | 6.9 (5.4, 8.5)                                | 4.7 (3.5, 6)                                       | 2.3 (1.7, 2.9)                                 | 70 (44, 113)                             | 737 (525, 958)                          | 862 (689, 1060)                         | 9 (6, 15)                         | 98 (70, 128)                   | 115 (92, 141)        | 1.1 (0.7, 1.5)                           | 11.9 (9.9, 14)          | 14 (12.4, 15.5)   |
|             | Male      | 7323691    | 6382                    | 6.9 (5.4, 8.4)                                | 4.6 (3.4, 5.8)                                     | 2.3 (1.7, 2.9)                                 | 78 (56, 111)                             | 843 (672, 1008)                         | 959 (829, 1102)                         | 11 (8, 15)                        | 115 (92, 138)                  | 131 (113, 150)       | 1.2 (0.8, 1.7)                           | 13.2 (11.1, 15.2)       | 15.1 (13.2, 16.8) |
|             | All       | 14815952   | 12576                   | 6.9 (5.8, 8)                                  | 4.7 (3.8, 5.5)                                     | 2.3 (1.9, 2.7)                                 | 149 (110, 202)                           | 1580 (1325, 1854)                       | 1821 (1597, 2063)                       | 10 (7, 14)                        | 107 (89, 125)                  | 123 (108, 139)       | 1.2 (0.9, 1.4)                           | 12.6 (10.9, 14.1)       | 14.5 (13.3, 15.7) |
| Poland      | Age 25-69 | 39673357   | 36870                   | 16.9 (16.5, 17.3)                             | 2.6 (2.4, 2.8)                                     | 0.9 (0.9, 1)                                   | 5778 (4961, 6672)                        | 7787 (6719, 8925)                       | 2116 (1828, 2440)                       | 146 (125, 168)                    | 196 (169, 225)                 | 53 (46, 61)          | 15.7 (13.7, 17.8)                        | 21.1 (18.5, 23.5)       | 5.7 (5, 6.5)      |
|             | Age 70+   | 1971528    | 29756                   | 16.9 (16.2, 17.5)                             | 2.5 (2.2, 2.9)                                     | 0.9 (0.8, 0.9)                                 | 3069 (2380, 3783)                        | 4115 (3218, 5061)                       | 951 (764, 1162)                         | 1557 (1207, 1919)                 | 2087 (1632, 2567)              | 482 (388, 589)       | 10.3 (8.1, 12.7)                         | 13.8 (10.9, 16.8)       | 3.2 (2.5, 3.8)    |
|             | Female    | 21244918   | 26972                   | 17.2 (13.4, 20.9)                             | 2.6 (1.9, 3.4)                                     | 0.9 (0.6, 1.3)                                 | 3428 (2791, 4087)                        | 4444 (3631, 5274)                       | 1150 (950, 1367)                        | 161 (131, 192)                    | 209 (171, 248)                 | 54 (45, 64)          | 12.7 (10.5, 14.9)                        | 16.5 (13.8, 19.2)       | 4.3 (3.5, 5)      |
|             | Male      | 20399967   | 39708                   | 16.7 (13, 20.3)                               | 2.6 (1.9, 3.3)                                     | 0.9 (0.5, 1.3)                                 | 5419 (4611, 6268)                        | 7458 (6364, 8562)                       | 1917 (1639, 2239)                       | 266 (226, 307)                    | 366 (312, 420)                 | 94 (80, 110)         | 13.7 (11.2, 16.1)                        | 18.8 (15.6, 21.7)       | 4.8 (4, 5.7)      |
|             | All       | 41644885   | 66603                   | 16.9 (14.3, 19.5)                             | 2.6 (2.1, 3.1)                                     | 0.9 (0.6, 1.2)                                 | 8847 (7762, 9880)                        | 11902 (10473, 13211)                    | 3067 (2722, 3455)                       | 212 (186, 237)                    | 286 (251, 317)                 | 74 (65, 83)          | 13.3 (11.6, 14.9)                        | 17.9 (15.9, 20)         | 4.6 (4, 5.2)      |
| Portugal    | Age 25-69 | 23238162   | 22939                   | 12.1 (11.8, 12.4)                             | 4.8 (4.6, 4.9)                                     | 1.2 (1.1, 1.2)                                 | 1056 (840, 1280)                         | 3616 (2948, 4316)                       | 1808 (1539, 2104)                       | 45 (36, 55)                       | 156 (127, 186)                 | 78 (66, 91)          | 4.6 (4, 5.2)                             | 15.8 (14, 17.6)         | 7.9 (7.1, 8.6)    |
|             | Age 70+   | 3811002    | 69438                   | 12.1 (11.5, 12.7)                             | 4.6 (4.3, 4.9)                                     | 1.1 (1, 1.2)                                   | 2276 (1602, 2961)                        | 7398 (5430, 9248)                       | 3325 (2691, 4138)                       | 597 (420, 777)                    | 1941 (1425, 2427)              | 872 (706, 1086)      | 3.3 (2.4, 4)                             | 10.7 (8.4, 12.9)        | 4.8 (4, 5.6)      |
|             | Female    | 14315882   | 45990                   | 12.2 (9.6, 14.9)                              | 4.8 (3.6, 6)                                       | 1.2 (0.8, 1.6)                                 | 1631 (998, 2280)                         | 5026 (3235, 6606)                       | 2358 (1785, 3037)                       | 114 (70, 159)                     | 351 (226, 461)                 | 165 (125, 212)       | 3.5 (2.9, 4.2)                           | 10.9 (9.3, 12.6)        | 5.1 (4.5, 5.8)    |
|             | Male      | 12733282   | 46397                   | 12 (9.3, 14.6)                                | 4.7 (3.5, 5.9)                                     | 1.1 (0.7, 1.6)                                 | 1701 (1335, 2090)                        | 5988 (4864, 7186)                       | 2775 (2375, 3218)                       | 134 (105, 164)                    | 470 (382, 564)                 | 218 (187, 253)       | 3.7 (2.9, 4.4)                           | 12.9 (11.1, 14.9)       | 6 (5.2, 6.7)      |
|             | All       | 27049164   | 92401                   | 12.1 (10.2, 14)                               | 4.8 (3.9, 5.6)                                     | 1.2 (0.9, 1.5)                                 | 3331 (2628, 4072)                        | 11014 (8929, 13008)                     | 5133 (4461, 5963)                       | 123 (97, 151)                     | 407 (330, 481)                 | 190 (165, 220)       | 3.6 (3.2, 4.1)                           | 11.9 (10.7, 13.2)       | 5.6 (5.1, 6)      |
| Qatar       | Age 25-69 | 6456489    | 2308                    | 9.5 (9.3, 9.8)                                | 5.4 (5, 5.8)                                       | 1.1 (1, 1.1)                                   | 39 (28, 55)                              | 330 (267, 395)                          | 154 (129, 180)                          | 6 (4, 9)                          | 51 (41, 61)                    | 24 (20, 28)          | 1.7 (1.3, 2.1)                           | 14.3 (12.4, 16.2)       | 6.7 (6, 7.4)      |
|             | Age 70+   | 1393476    | 12520                   | 9.6 (9.2, 9.9)                                | 5.2 (4.5, 5.8)                                     | 1 (0.9, 1.1)                                   | 133 (78, 217)                            | 1232 (883, 1594)                        | 533 (405, 677)                          | 96 (56, 156)                      | 884 (634, 1144)                | 382 (291, 486)       | 1.1 (0.6, 1.5)                           | 9.8 (7.7, 12)           | 4.3 (3.4, 5.1)    |
|             | Female    | 4128318    | 7850                    | 9.7 (7.5, 11.8)                               | 5.4 (4, 6.8)                                       | 1.1 (0.7, 1.5)                                 | 87 (45, 163)                             | 792 (505, 1095)                         | 353 (244, 481)                          | 21 (11, 39)                       | 192 (122, 265)                 | 86 (59, 116)         | 1.1 (0.8, 1.4)                           | 10.1 (8.6, 11.7)        | 4.5 (3.9, 5.1)    |
|             | Male      | 3721647    | 6952                    | 9.4 (7.4, 11.5)                               | 5.3 (4, 6.7)                                       | 1 (0.6, 1.4)                                   | 86 (54, 130)                             | 770 (577, 959)                          | 334 (269, 418)                          | 23 (15, 35)                       | 207 (155, 258)                 | 90 (72, 112)         | 1.2 (0.8, 1.6)                           | 11.1 (9.2, 12.9)        | 4.8 (4.1, 5.5)    |
|             | All       | 7849965    | 14780                   | 9.5 (8.1, 11)                                 | 5.4 (4.4, 6.3)                                     | 1 (0.8, 1.3)                                   | 173 (112, 255)                           | 1562 (1193, 1932)                       | 687 (559, 833)                          | 22 (14, 33)                       | 199 (152, 246)                 | 88 (71, 106)         | 1.2 (0.9, 1.4)                           | 10.6 (9.5, 11.7)        | 4.6 (4.2, 5.1)    |
| Qatar       | Age 25-69 | 1254053    | 193                     | 10.1 (9.1, 11.1)                              | 6.8 (6, 7.7)                                       | 1.7 (1.3, 2.1)                                 | 5 (3, 7)                                 | 24 (19, 30)                             | 29 (21, 38)                             | 4 (2, 5)                          | 20 (15, 24)                    | 23 (17, 31)          | 2.4 (1.5, 3.4)                           | 12.7 (9.9, 15.2)        | 15 (10.9, 19.3)   |
|             | Age 70+   | 11601      | 108                     | 10.1 (8.5, 11.7)                              | 6.6 (5.5, 7.7)                                     | 1.6 (1.1, 2.2)                                 | 2 (1, 3)                                 | 9 (6, 12)                               | 10 (6, 14)                              | 144 (83, 232)                     | 791 (557, 1071)                | 831 (520, 1184)      | 1.6 (0.6, 2.5)                           | 8.5 (5.8, 11.6)         | 9 (4.6, 12.9)     |

|                                         |          |        |                   |                 |                |                      |                      |                      |                   |                   |                  |                   |                   |                  |
|-----------------------------------------|----------|--------|-------------------|-----------------|----------------|----------------------|----------------------|----------------------|-------------------|-------------------|------------------|-------------------|-------------------|------------------|
| Female                                  | 246129   | 51     | 10.5 (8.2, 12.8)  | 7 (5.2, 8.7)    | 1.8 (1.3, 2.3) | 1 (1, 2)             | 5 (4, 6)             | 6 (4, 8)             | 4 (3, 6)          | 20 (15, 25)       | 23 (17, 31)      | 2.1 (1.2, 2.9)    | 9.5 (7.3, 11.8)   | 11.3 (7.8, 14.8) |
| Male                                    | 1019525  | 249    | 10.1 (7.9, 12.3)  | 6.8 (5.1, 8.5)  | 1.7 (1.2, 2.2) | 5 (4, 8)             | 29 (23, 36)          | 33 (24, 43)          | 5 (3, 7)          | 28 (22, 35)       | 32 (23, 42)      | 2.1 (1.1, 3.1)    | 11.6 (8.6, 14.6)  | 13.2 (8.7, 17.5) |
| All                                     | 1265654  | 301    | 10.2 (8.6, 11.8)  | 6.8 (5.6, 8)    | 1.7 (1.4, 2.1) | 6 (5, 9)             | 34 (27, 40)          | 39 (29, 49)          | 5 (4, 7)          | 27 (22, 32)       | 31 (23, 39)      | 2.1 (1.4, 2.9)    | 11.2 (8.9, 13.3)  | 12.9 (9.4, 16.3) |
| <b>Romania</b>                          |          |        |                   |                 |                |                      |                      |                      |                   |                   |                  |                   |                   |                  |
| Age 25-69                               | 13009613 | 16670  | 21.4 (20.7, 22)   | 9.8 (9.1, 10.6) | 0.9 (0.9, 1)   | 1019 (760, 1367)     | 1019 (760, 1367)     | 877 (750, 1012)      | 78 (58, 105)      | 78 (58, 105)      | 67 (58, 78)      | 6.1 (4.8, 7.5)    | 6.1 (4.8, 7.4)    | 5.3 (4.7, 5.8)   |
| Age 70+                                 | 2323080  | 54223  | 21.4 (20.3, 22.5) | 9.5 (8.3, 10.8) | 0.9 (0.8, 0.9) | 2384 (1521, 3434)    | 2384 (1521, 3434)    | 1714 (1386, 2088)    | 1026 (655, 1478)  | 1026 (655, 1478)  | 738 (597, 899)   | 4.4 (2.9, 5.9)    | 4.4 (2.8, 5.8)    | 3.2 (2.6, 3.7)   |
| Female                                  | 8057991  | 36339  | 21.6 (16.9, 26.3) | 9.8 (7.5, 12.2) | 0.9 (0.5, 1.3) | 1626 (959, 2524)     | 1626 (959, 2524)     | 1252 (974, 1592)     | 202 (119, 313)    | 202 (119, 313)    | 155 (121, 198)   | 4.5 (3.2, 5.8)    | 4.5 (3.2, 5.7)    | 3.4 (3, 3.9)     |
| Male                                    | 7274702  | 34429  | 21.1 (16.5, 25.8) | 9.7 (7.3, 12)   | 0.9 (0.5, 1.3) | 1777 (1216, 2433)    | 1777 (1216, 2433)    | 1339 (1121, 1565)    | 244 (167, 334)    | 244 (167, 334)    | 184 (154, 215)   | 5.2 (3.8, 6.7)    | 5.2 (3.8, 6.5)    | 3.9 (3.3, 4.5)   |
| All                                     | 15332693 | 70820  | 21.4 (18.1, 24.7) | 9.8 (8.1, 11.5) | 0.9 (0.6, 1.2) | 3403 (2510, 4521)    | 3403 (2510, 4521)    | 2591 (2248, 3001)    | 222 (164, 295)    | 222 (164, 295)    | 169 (147, 196)   | 4.8 (3.8, 5.7)    | 4.8 (3.9, 5.7)    | 3.7 (3.3, 4)     |
| <b>Russia</b>                           |          |        |                   |                 |                |                      |                      |                      |                   |                   |                  |                   |                   |                  |
| Age 25-69                               | 85846445 | 210860 | 13.3 (12.4, 14.3) | 8 (7.4, 8.6)    | 1 (0.9, 1)     | 15989 (12181, 20079) | 19893 (15409, 24744) | 12701 (10892, 14548) | 186 (142, 234)    | 232 (179, 288)    | 148 (127, 169)   | 7.6 (6.3, 8.9)    | 9.4 (7.9, 11.1)   | 6 (5.4, 6.7)     |
| Age 70+                                 | 13974788 | 472242 | 13.3 (11.5, 15.2) | 7.8 (6.8, 8.9)  | 0.9 (0.8, 1)   | 25000 (17806, 35209) | 30882 (22506, 42351) | 16779 (13630, 20319) | 1789 (1274, 2519) | 2210 (1610, 3030) | 1201 (975, 1454) | 5.3 (3.5, 7)      | 6.5 (4.6, 8.5)    | 3.6 (2.8, 4.2)   |
| Female                                  | 55703737 | 369920 | 13.5 (10.6, 16.4) | 8.1 (6.1, 10.1) | 1 (0.6, 1.4)   | 21310 (14233, 31431) | 25019 (17082, 35835) | 14431 (11357, 17786) | 383 (256, 564)    | 449 (307, 643)    | 259 (204, 319)   | 5.8 (4.4, 7.1)    | 6.8 (5.5, 8.1)    | 3.9 (3.4, 4.4)   |
| Male                                    | 44117496 | 312218 | 13.1 (10.2, 16)   | 7.9 (6, 9.8)    | 1 (0.6, 1.3)   | 19680 (14737, 25193) | 25756 (19686, 31999) | 15050 (12835, 17569) | 446 (334, 571)    | 584 (446, 725)    | 341 (291, 398)   | 6.3 (4.8, 7.8)    | 8.2 (6.1, 10.2)   | 4.8 (4.2, 5.5)   |
| All                                     | 99821233 | 682061 | 13.3 (11.2, 15.4) | 8 (6.6, 9.4)    | 1 (0.7, 1.2)   | 40989 (32040, 52115) | 50775 (40710, 63080) | 29480 (25739, 33598) | 411 (321, 522)    | 509 (408, 632)    | 295 (258, 337)   | 6 (5, 7)          | 7.4 (6.3, 8.5)    | 4.3 (3.9, 4.7)   |
| <b>Rwanda</b>                           |          |        |                   |                 |                |                      |                      |                      |                   |                   |                  |                   |                   |                  |
| Age 25-69                               | 3714622  | 1334   | 11 (10.1, 11.9)   | 3.3 (2.9, 3.7)  | 0.5 (0.4, 0.7) | 36 (26, 48)          | 254 (206, 303)       | 26 (16, 38)          | 10 (7, 13)        | 68 (55, 82)       | 7 (4, 10)        | 2.7 (2, 3.4)      | 19 (16.4, 21.5)   | 1.9 (1.2, 2.7)   |
| Age 70+                                 | 168408   | 1066   | 11 (9.6, 12.4)    | 3.2 (2.6, 3.8)  | 0.5 (0.3, 0.7) | 19 (13, 30)          | 138 (103, 175)       | 12 (5, 20)           | 115 (74, 176)     | 820 (610, 1041)   | 70 (32, 119)     | 1.8 (1.1, 2.5)    | 13 (10.2, 15.7)   | 1.1 (0.4, 1.7)   |
| Female                                  | 2022608  | 1059   | 11.1 (8.7, 13.6)  | 3.4 (2.5, 4.3)  | 0.5 (0.2, 0.9) | 25 (18, 35)          | 164 (127, 203)       | 16 (9, 24)           | 13 (9, 17)        | 81 (63, 100)      | 8 (4, 12)        | 2.4 (1.5, 3.2)    | 15.4 (12.7, 18.2) | 1.5 (0.7, 2.3)   |
| Male                                    | 1860422  | 1334   | 10.9 (8.5, 13.3)  | 3.3 (2.4, 4.2)  | 0.5 (0.2, 0.8) | 30 (21, 41)          | 228 (181, 276)       | 22 (12, 33)          | 16 (11, 22)       | 123 (97, 148)     | 12 (7, 18)       | 2.2 (1.3, 3.1)    | 17.1 (13.9, 20.4) | 1.6 (0.7, 2.5)   |
| All                                     | 3883030  | 2397   | 11 (9.3, 12.7)    | 3.3 (2.7, 4)    | 0.5 (0.3, 0.8) | 55 (43, 70)          | 392 (334, 455)       | 37 (25, 52)          | 14 (11, 18)       | 101 (86, 117)     | 10 (6, 14)       | 2.3 (1.7, 2.9)    | 16.3 (14.2, 18.3) | 1.6 (0.9, 2.2)   |
| <b>Saint Lucia</b>                      |          |        |                   |                 |                |                      |                      |                      |                   |                   |                  |                   |                   |                  |
| Age 25-69                               | 86586    | 31     | 8.7 (8, 9.4)      | 4 (3.7, 4.4)    | 0.5 (0.4, 0.6) | 0 (0, 1)             | 5 (4, 6)             | 0 (0, 1)             | 5 (4, 7)          | 63 (52, 74)       | 5 (3, 8)         | 1.5 (1.1, 1.8)    | 17.5 (15.3, 19.7) | 1.5 (1, 2)       |
| Age 70+                                 | 8236     | 95     | 8.7 (7.5, 9.8)    | 3.9 (3.3, 4.4)  | 0.5 (0.3, 0.6) | 1 (1, 1)             | 11 (8, 14)           | 1 (0, 1)             | 103 (61, 170)     | 1350 (964, 1753)  | 93 (40, 171)     | 0.9 (0.6, 1.3)    | 11.7 (9.3, 14)    | 0.8 (0.4, 1.2)   |
| Female                                  | 49777    | 62     | 8.8 (6.9, 10.8)   | 4.1 (3, 5.1)    | 0.5 (0.2, 0.8) | 1 (0, 1)             | 8 (5, 11)            | 1 (0, 1)             | 12 (7, 23)        | 155 (102, 215)    | 12 (5, 23)       | 1 (0.6, 1.3)      | 12.4 (10.3, 14.5) | 0.9 (0.5, 1.3)   |
| Male                                    | 45045    | 63     | 8.6 (6.7, 10.5)   | 3.9 (2.9, 5)    | 0.5 (0.2, 0.8) | 1 (0, 1)             | 9 (7, 11)            | 1 (0, 1)             | 15 (10, 22)       | 197 (152, 243)    | 14 (8, 23)       | 1.1 (0.7, 1.5)    | 14 (11.7, 16.2)   | 1 (0.6, 1.5)     |
| All                                     | 94822    | 126    | 8.7 (7.4, 10.1)   | 4 (3.2, 4.8)    | 0.5 (0.3, 0.7) | 1 (1, 2)             | 17 (13, 20)          | 1 (1, 2)             | 14 (10, 20)       | 175 (140, 210)    | 13 (8, 20)       | 1 (0.8, 1.3)      | 13.2 (11.5, 14.7) | 1 (0.7, 1.3)     |
| <b>Saint Vincent and the Grenadines</b> |          |        |                   |                 |                |                      |                      |                      |                   |                   |                  |                   |                   |                  |
| Age 25-69                               | 54739    | 28     | 8.3 (7.7, 9)      | 4.4 (4.1, 4.8)  | 0.5 (0.4, 0.6) | 0 (0, 1)             | 5 (4, 5)             | 0 (0, 1)             | 8 (5, 10)         | 84 (70, 99)       | 7 (4, 10)        | 1.5 (1.1, 1.9)    | 16.3 (14.3, 18.6) | 1.3 (0.8, 1.7)   |
| Age 70+                                 | 5228     | 85     | 8.2 (7.2, 9.2)    | 4.3 (3.7, 4.9)  | 0.4 (0.3, 0.5) | 1 (1, 1)             | 10 (7, 12)           | 1 (0, 1)             | 156 (96, 234)     | 1824 (1384, 2256) | 113 (52, 194)    | 1 (0.6, 1.4)      | 11.2 (8.9, 13.7)  | 0.7 (0.3, 1.1)   |
| Female                                  | 29703    | 57     | 8.4 (6.5, 10.2)   | 4.5 (3.3, 5.7)  | 0.5 (0.2, 0.8) | 1 (0, 1)             | 7 (5, 9)             | 0 (0, 1)             | 21 (13, 34)       | 232 (169, 301)    | 16 (7, 29)       | 1.1 (0.7, 1.4)    | 12 (9.9, 14)      | 0.8 (0.5, 1.2)   |
| Male                                    | 30264    | 55     | 8.2 (6.4, 10)     | 4.3 (3.2, 5.5)  | 0.5 (0.2, 0.8) | 1 (0, 1)             | 7 (6, 9)             | 0 (0, 1)             | 21 (14, 31)       | 240 (191, 293)    | 16 (8, 24)       | 1.1 (0.7, 1.5)    | 13.1 (10.7, 15.2) | 0.8 (0.5, 1.2)   |
| All                                     | 59967    | 113    | 8.3 (7, 9.6)      | 4.4 (3.6, 5.2)  | 0.5 (0.3, 0.7) | 1 (1, 2)             | 14 (12, 17)          | 1 (1, 1)             | 21 (15, 28)       | 236 (195, 276)    | 16 (10, 24)      | 1.1 (0.8, 1.4)    | 12.5 (11, 14.1)   | 0.8 (0.6, 1.1)   |
| <b>Samoa</b>                            |          |        |                   |                 |                |                      |                      |                      |                   |                   |                  |                   |                   |                  |
| Age 25-69                               | 73610    | 32     | 27.5 (27.1, 28)   | 1.5 (1.3, 1.6)  | 0.8 (0.6, 0.9) | 7 (6, 9)             | 7 (6, 9)             | 1 (1, 2)             | 99 (78, 120)      | 99 (78, 120)      | 18 (12, 26)      | 22.9 (20.2, 25.6) | 22.8 (20.4, 25.4) | 4.2 (3.1, 5.5)   |
| Age 70+                                 | 6034     | 25     | 27.5 (26.8, 28.2) | 1.4 (1.2, 1.7)  | 0.7 (0.5, 0.9) | 4 (2, 5)             | 4 (2, 5)             | 1 (0, 1)             | 633 (401, 906)    | 633 (401, 906)    | 102 (45, 173)    | 15.4 (12.2, 18.7) | 15.4 (12.2, 18.4) | 2.5 (1.3, 3.6)   |
| Female                                  | 39291    | 18     | 27.9 (21.9, 33.9) | 1.5 (1, 2)      | 0.8 (0.4, 1.1) | 3 (2, 4)             | 3 (2, 4)             | 1 (0, 1)             | 79 (51, 112)      | 79 (51, 112)      | 14 (7, 23)       | 17.6 (14.8, 20.4) | 17.5 (14.7, 20.2) | 3.1 (1.8, 4.2)   |
| Male                                    | 40353    | 39     | 27.2 (21.2, 33.1) | 1.4 (0.9, 1.9)  | 0.8 (0.4, 1.1) | 8 (6, 10)            | 8 (6, 10)            | 1 (1, 2)             | 198 (157, 244)    | 198 (157, 244)    | 35 (22, 50)      | 20.5 (17.2, 23.8) | 20.5 (17.3, 23.8) | 3.7 (2.3, 5)     |

|                     |          |       |                   |                 |                |                 |                   |                 |                   |                   |                |                   |                   |                  |
|---------------------|----------|-------|-------------------|-----------------|----------------|-----------------|-------------------|-----------------|-------------------|-------------------|----------------|-------------------|-------------------|------------------|
| All                 | 79644    | 56    | 27.5 (23.3, 31.8) | 1.5 (1.1, 1.8)  | 0.8 (0.5, 1)   | 11 (9, 13)      | 11 (9, 13)        | 2 (1, 3)        | 139 (113, 167)    | 139 (113, 167)    | 25 (17, 33)    | 19.6 (17.5, 21.8) | 19.6 (17.4, 21.7) | 3.5 (2.5, 4.3)   |
| <b>Saudi Arabia</b> |          |       |                   |                 |                |                 |                   |                 |                   |                   |                |                   |                   |                  |
| Age 25-69           | 59307    | 14    | 13.6 (12.4, 14.7) | 4.1 (3.7, 4.4)  | 1.1 (1, 1.1)   | 2 (1, 2)        | 3 (2, 3)          | 2 (1, 2)        | 30 (24, 36)       | 47 (38, 57)       | 31 (22, 41)    | 12.8 (11, 14.6)   | 20.2 (17.6, 22.8) | 13 (9.3, 16.7)   |
| Age 70+             | 4521     | 22    | 13.5 (11.8, 15.2) | 3.9 (3.4, 4.4)  | 1 (0.9, 1.1)   | 2 (1, 2)        | 3 (2, 4)          | 2 (1, 3)        | 427 (311, 550)    | 677 (499, 856)    | 403 (223, 618) | 8.6 (6.6, 10.6)   | 13.7 (10.9, 16.6) | 8.1 (4.4, 11.9)  |
| Female              | 33248    | 21    | 13.7 (10.7, 16.7) | 4.1 (3, 5.2)    | 1.1 (0.7, 1.5) | 2 (2, 3)        | 3 (3, 4)          | 2 (1, 3)        | 65 (49, 83)       | 100 (76, 127)     | 64 (38, 93)    | 10.2 (8.3, 12.2)  | 15.6 (13.1, 18.3) | 9.9 (5.9, 13.8)  |
| Male                | 30580    | 15    | 13.4 (10.4, 16.3) | 4 (2.9, 5.1)    | 1.1 (0.7, 1.5) | 2 (1, 2)        | 3 (2, 3)          | 2 (1, 2)        | 50 (40, 63)       | 83 (67, 104)      | 50 (34, 71)    | 10.2 (8.2, 12.2)  | 17 (13.9, 20.2)   | 10.2 (6.3, 14.1) |
| All                 | 63828    | 36    | 13.5 (11.4, 15.6) | 4.1 (3.3, 4.8)  | 1.1 (0.8, 1.4) | 4 (3, 4)        | 6 (5, 7)          | 4 (3, 5)        | 58 (48, 69)       | 92 (77, 108)      | 57 (41, 74)    | 10.2 (8.8, 11.7)  | 16.1 (14, 18.2)   | 10 (6.9, 12.8)   |
| <b>Senegal</b>      |          |       |                   |                 |                |                 |                   |                 |                   |                   |                |                   |                   |                  |
| Age 25-69           | 13702957 | 7402  | 10.7 (9.9, 11.6)  | 6.1 (5.5, 6.7)  | 1 (0.8, 1.1)   | 611 (500, 738)  | 1352 (1121, 1601) | 556 (461, 661)  | 45 (36, 54)       | 99 (82, 117)      | 41 (34, 48)    | 8.3 (6.9, 9.7)    | 18.3 (16, 21)     | 7.5 (6.5, 8.5)   |
| Age 70+             | 467617   | 7071  | 10.6 (9, 12)      | 5.9 (4.9, 7)    | 0.9 (0.6, 1.2) | 371 (273, 485)  | 818 (609, 1035)   | 288 (214, 368)  | 794 (584, 1038)   | 1748 (1302, 2214) | 616 (458, 788) | 5.3 (4.1, 6.4)    | 11.6 (9.2, 14.1)  | 4.1 (3.3, 4.9)   |
| Female              | 5712671  | 5048  | 10.8 (8.5, 13.2)  | 6.2 (4.6, 7.7)  | 1 (0.6, 1.4)   | 334 (251, 437)  | 686 (530, 873)    | 269 (212, 332)  | 59 (44, 77)       | 120 (93, 153)     | 47 (37, 58)    | 6.7 (5.3, 8.2)    | 13.6 (11.2, 16.1) | 5.3 (4.4, 6.3)   |
| Male                | 8457903  | 9400  | 10.6 (8.2, 12.9)  | 6 (4.5, 7.5)    | 0.9 (0.6, 1.3) | 648 (514, 796)  | 1483 (1213, 1774) | 575 (469, 681)  | 77 (61, 94)       | 175 (143, 210)    | 68 (55, 80)    | 6.9 (5.4, 8.4)    | 15.8 (12.9, 18.5) | 6.1 (5.1, 7.2)   |
| All                 | 14170574 | 14416 | 10.7 (9, 12.4)    | 6.1 (5, 7.2)    | 1 (0.7, 1.2)   | 983 (821, 1151) | 2169 (1853, 2501) | 844 (724, 970)  | 69 (58, 81)       | 153 (131, 176)    | 60 (51, 68)    | 6.8 (5.8, 7.8)    | 15 (13, 16.9)     | 5.8 (5.1, 6.6)   |
| <b>Serbia</b>       |          |       |                   |                 |                |                 |                   |                 |                   |                   |                |                   |                   |                  |
| Age 25-69           | 4272625  | 966   | 10.1 (9.3, 10.8)  | 8.4 (7.8, 9.1)  | 1 (0.9, 1)     | 29 (20, 39)     | 133 (105, 160)    | 59 (43, 77)     | 7 (5, 9)          | 31 (24, 37)       | 14 (10, 18)    | 3 (2.1, 3.8)      | 13.7 (11.7, 15.9) | 6.1 (4.5, 7.6)   |
| Age 70+             | 152761   | 528   | 10.1 (8.6, 11.4)  | 8.1 (6.9, 9.3)  | 0.9 (0.8, 1)   | 10 (5, 17)      | 51 (36, 69)       | 20 (11, 32)     | 67 (36, 109)      | 336 (237, 454)    | 132 (72, 209)  | 1.9 (0.8, 3)      | 9.7 (6.8, 12.6)   | 3.8 (1.8, 5.7)   |
| Female              | 2300152  | 715   | 10.2 (8, 12.5)    | 8.5 (6.4, 10.5) | 1 (0.6, 1.4)   | 20 (13, 30)     | 87 (64, 112)      | 39 (25, 54)     | 9 (6, 13)         | 38 (28, 49)       | 17 (11, 23)    | 2.8 (1.7, 4)      | 12.1 (9.6, 14.9)  | 5.4 (3.4, 7.4)   |
| Male                | 2125234  | 777   | 9.9 (7.7, 12.1)   | 8.3 (6.3, 10.3) | 1 (0.6, 1.3)   | 18 (13, 25)     | 97 (76, 119)      | 40 (27, 55)     | 9 (6, 12)         | 46 (36, 56)       | 19 (13, 26)    | 2.4 (1.4, 3.3)    | 12.5 (9.8, 15.2)  | 5.2 (3.2, 7.1)   |
| All                 | 4425386  | 1496  | 10.1 (8.5, 11.6)  | 8.4 (6.9, 9.8)  | 1 (0.7, 1.2)   | 39 (29, 51)     | 184 (152, 219)    | 79 (60, 100)    | 9 (7, 11)         | 42 (34, 49)       | 18 (13, 23)    | 2.6 (1.9, 3.3)    | 12.3 (10.5, 14.2) | 5.3 (3.9, 6.8)   |
| <b>Seychelles</b>   |          |       |                   |                 |                |                 |                   |                 |                   |                   |                |                   |                   |                  |
| Age 25-69           | 5724461  | 5113  | 17.8 (16.4, 19.2) | 4.4 (4, 4.8)    | 1 (0.9, 1.2)   | 130 (82, 200)   | 433 (316, 562)    | 293 (244, 348)  | 23 (14, 35)       | 76 (55, 98)       | 51 (43, 61)    | 2.5 (1.8, 3.3)    | 8.5 (6.8, 10)     | 5.7 (5.1, 6.3)   |
| Age 70+             | 1037317  | 18504 | 17.7 (15.6, 19.9) | 4.3 (3.6, 4.9)  | 1 (0.7, 1.2)   | 315 (177, 520)  | 1116 (749, 1541)  | 647 (513, 799)  | 304 (171, 501)    | 1076 (722, 1486)  | 623 (495, 771) | 1.7 (0.8, 2.6)    | 6 (4.1, 7.9)      | 3.5 (2.8, 4.2)   |
| Female              | 3481494  | 11006 | 17.9 (14.1, 21.8) | 4.4 (3.3, 5.6)  | 1.1 (0.7, 1.5) | 207 (109, 379)  | 675 (434, 1005)   | 423 (325, 545)  | 60 (31, 109)      | 194 (125, 289)    | 121 (93, 156)  | 1.9 (1.2, 2.6)    | 6.1 (4.6, 7.7)    | 3.8 (3.3, 4.4)   |
| Male                | 3280284  | 12631 | 17.5 (13.6, 21.3) | 4.3 (3.2, 5.5)  | 1 (0.6, 1.4)   | 238 (140, 391)  | 874 (612, 1177)   | 517 (419, 628)  | 72 (43, 119)      | 266 (187, 359)    | 158 (128, 191) | 1.9 (1.2, 2.6)    | 6.9 (5.2, 8.6)    | 4.1 (3.5, 4.7)   |
| All                 | 6761778  | 23684 | 17.8 (15, 20.5)   | 4.4 (3.6, 5.2)  | 1 (0.8, 1.3)   | 445 (294, 653)  | 1548 (1153, 1983) | 939 (801, 1103) | 66 (43, 97)       | 229 (171, 293)    | 139 (118, 163) | 1.9 (1.4, 2.4)    | 6.5 (5.3, 7.6)    | 4 (3.6, 4.4)     |
| <b>Sierra Leone</b> |          |       |                   |                 |                |                 |                   |                 |                   |                   |                |                   |                   |                  |
| Age 25-69           | 29450    | 35    | 14.5 (13.4, 15.7) | 3.7 (3.4, 4.1)  | 0.7 (0.6, 0.8) | 6 (5, 7)        | 6 (5, 7)          | 2 (2, 3)        | 201 (170, 233)    | 205 (173, 239)    | 84 (63, 108)   | 16.9 (14.7, 19.1) | 17.3 (15.1, 19.5) | 7.1 (5.5, 8.8)   |
| Age 70+             | 1537     | 26    | 14.4 (12.2, 16.5) | 3.6 (3.1, 4.2)  | 0.7 (0.4, 0.9) | 3 (2, 4)        | 3 (2, 4)          | 1 (1, 2)        | 1924 (1517, 2334) | 1961 (1547, 2378) | 710 (450, 999) | 11.3 (8.7, 13.9)  | 11.6 (8.8, 14.2)  | 4.2 (2.5, 6)     |
| Female              | 15835    | 22    | 14.7 (11.5, 17.8) | 3.8 (2.8, 4.8)  | 0.7 (0.4, 1.1) | 3 (2, 4)        | 3 (2, 4)          | 1 (1, 2)        | 191 (156, 228)    | 191 (156, 228)    | 74 (52, 99)    | 13.6 (11.3, 16)   | 13.6 (11.1, 16.1) | 5.3 (3.6, 7)     |
| Male                | 15152    | 39    | 14.4 (11.2, 17.5) | 3.7 (2.7, 4.6)  | 0.7 (0.4, 1)   | 6 (5, 7)        | 6 (5, 7)          | 2 (2, 3)        | 386 (323, 453)    | 398 (334, 467)    | 157 (113, 204) | 15.1 (12.2, 17.9) | 15.5 (12.6, 18.4) | 6.2 (4, 8.3)     |
| All                 | 30987    | 61    | 14.5 (12.3, 16.8) | 3.7 (3, 4.4)    | 0.7 (0.5, 0.9) | 9 (8, 10)       | 9 (8, 10)         | 4 (3, 4)        | 286 (250, 325)    | 292 (255, 331)    | 115 (90, 142)  | 14.5 (12.6, 16.5) | 14.8 (12.8, 16.8) | 5.8 (4.5, 7.2)   |
| <b>Singapore</b>    |          |       |                   |                 |                |                 |                   |                 |                   |                   |                |                   |                   |                  |
| Age 25-69           | 2160560  | 917   | 11.7 (11.5, 11.9) | 3.7 (3.5, 4)    | 1.1 (1, 1.1)   | 95 (78, 116)    | 171 (141, 206)    | 33 (22, 45)     | 44 (36, 54)       | 79 (65, 95)       | 15 (10, 21)    | 10.4 (8.9, 11.9)  | 18.7 (16.3, 21.1) | 3.6 (2.4, 4.8)   |
| Age 70+             | 47842    | 283   | 11.6 (11.4, 11.9) | 3.6 (3.2, 4.1)  | 1 (0.9, 1.1)   | 20 (14, 27)     | 37 (26, 50)       | 6 (3, 11)       | 423 (290, 573)    | 783 (545, 1044)   | 129 (58, 223)  | 7.2 (5, 9.2)      | 13.2 (9.7, 16.9)  | 2.2 (0.8, 3.6)   |
| Female              | 1145271  | 522   | 11.9 (9.3, 14.5)  | 3.8 (2.8, 4.8)  | 1.1 (0.7, 1.5) | 51 (39, 65)     | 89 (68, 111)      | 18 (10, 27)     | 45 (34, 57)       | 78 (60, 97)       | 16 (9, 24)     | 9.8 (7.7, 11.8)   | 17 (14.1, 20)     | 3.4 (1.9, 5)     |
| Male                | 1063131  | 679   | 11.6 (9, 14.1)    | 3.7 (2.7, 4.7)  | 1 (0.6, 1.4)   | 64 (50, 80)     | 119 (94, 146)     | 21 (13, 31)     | 60 (47, 75)       | 112 (88, 137)     | 20 (12, 29)    | 9.5 (7.5, 11.4)   | 17.6 (14.7, 20.6) | 3.1 (1.7, 4.6)   |
| All                 | 2208402  | 1195  | 11.7 (9.9, 13.5)  | 3.7 (3, 4.4)    | 1.1 (0.8, 1.3) | 116 (96, 138)   | 208 (175, 246)    | 39 (27, 52)     | 52 (44, 62)       | 94 (79, 111)      | 18 (12, 24)    | 9.6 (8.2, 11.1)   | 17.4 (15, 19.9)   | 3.3 (2.2, 4.3)   |
| <b>Slovakia</b>     |          |       |                   |                 |                |                 |                   |                 |                   |                   |                |                   |                   |                  |



|                        |          |       |                   |                 |                |                  |                   |                   |                   |                   |                   |                   |                   |                |
|------------------------|----------|-------|-------------------|-----------------|----------------|------------------|-------------------|-------------------|-------------------|-------------------|-------------------|-------------------|-------------------|----------------|
| Age 25-69              | 2317712  | 1144  | 13.2 (12.3, 14.2) | 8.9 (8.3, 9.6)  | 1.4 (1.3, 1.5) | 42 (33, 53)      | 203 (169, 237)    | 76 (65, 88)       | 18 (14, 23)       | 87 (73, 102)      | 33 (28, 38)       | 3.7 (3, 4.3)      | 17.7 (15.7, 19.8) | 6.7 (5.9, 7.4) |
| Age 70+                | 183513   | 2010  | 13.2 (11.7, 14.8) | 8.6 (7.4, 9.8)  | 1.3 (1.2, 1.4) | 54 (39, 74)      | 246 (191, 304)    | 82 (67, 99)       | 296 (210, 403)    | 1339 (1043, 1658) | 449 (365, 540)    | 2.7 (1.8, 3.6)    | 12.2 (9.6, 14.7)  | 4.1 (3.4, 4.9) |
| Female                 | 1278167  | 1290  | 13.3 (10.4, 16.2) | 8.9 (6.8, 11.1) | 1.4 (0.9, 1.9) | 41 (28, 56)      | 170 (130, 213)    | 60 (49, 73)       | 32 (22, 44)       | 133 (101, 167)    | 47 (38, 57)       | 3.2 (2.4, 3.9)    | 13.2 (11.3, 15.4) | 4.7 (4, 5.3)   |
| Male                   | 1223058  | 1863  | 13 (10.2, 15.9)   | 8.8 (6.7, 10.9) | 1.4 (0.9, 1.8) | 56 (42, 71)      | 278 (228, 329)    | 98 (85, 115)      | 46 (35, 58)       | 227 (186, 269)    | 80 (70, 94)       | 3 (2.3, 3.7)      | 14.9 (12.5, 17.3) | 5.3 (4.5, 6.1) |
| All                    | 2501225  | 3151  | 13.2 (11.1, 15.2) | 8.9 (7.4, 10.4) | 1.4 (1.1, 1.7) | 97 (78, 118)     | 448 (384, 515)    | 159 (140, 178)    | 39 (31, 47)       | 179 (154, 206)    | 63 (56, 71)       | 3.1 (2.5, 3.6)    | 14.2 (12.6, 15.9) | 5 (4.5, 5.5)   |
| <b>Slovenia</b>        |          |       |                   |                 |                |                  |                   |                   |                   |                   |                   |                   |                   |                |
| Age 25-69              | 3369997  | 4241  | 13.4 (12.9, 13.9) | 8.2 (7.5, 8.8)  | 1.1 (1, 1.1)   | 296 (211, 391)   | 316 (227, 415)    | 421 (359, 485)    | 88 (63, 116)      | 94 (67, 123)      | 125 (107, 144)    | 7 (5.6, 8.2)      | 7.4 (6, 8.8)      | 9.9 (9, 10.8)  |
| Age 70+                | 453257   | 14848 | 13.5 (12.6, 14.4) | 7.9 (6.8, 8.9)  | 1 (0.9, 1.1)   | 751 (472, 1093)  | 797 (513, 1142)   | 922 (750, 1124)   | 1656 (1042, 2410) | 1758 (1132, 2519) | 2034 (1654, 2481) | 5 (3.4, 6.6)      | 5.4 (3.6, 7.2)    | 6.2 (5.2, 7.2) |
| Female                 | 2006820  | 10306 | 13.6 (10.6, 16.5) | 8.3 (6.2, 10.3) | 1.1 (0.7, 1.5) | 554 (326, 851)   | 562 (332, 859)    | 679 (524, 863)    | 276 (163, 424)    | 280 (165, 428)    | 339 (261, 430)    | 5.4 (4.2, 6.6)    | 5.5 (4.1, 6.8)    | 6.6 (5.9, 7.3) |
| Male                   | 1816434  | 8802  | 13.3 (10.4, 16.2) | 8 (6.1, 10)     | 1.1 (0.7, 1.5) | 492 (351, 668)   | 551 (396, 739)    | 664 (564, 768)    | 271 (193, 368)    | 303 (218, 407)    | 365 (311, 423)    | 5.6 (4.1, 7)      | 6.3 (4.7, 7.8)    | 7.5 (6.5, 8.5) |
| All                    | 3823254  | 19076 | 13.5 (11.4, 15.6) | 8.1 (6.7, 9.5)  | 1.1 (0.8, 1.4) | 1046 (747, 1393) | 1113 (803, 1460)  | 1343 (1165, 1554) | 274 (195, 364)    | 291 (210, 382)    | 351 (305, 406)    | 5.5 (4.5, 6.4)    | 5.8 (4.8, 6.9)    | 7 (6.4, 7.6)   |
| <b>Solomon Islands</b> |          |       |                   |                 |                |                  |                   |                   |                   |                   |                   |                   |                   |                |
| Age 25-69              | 1280621  | 578   | 23.9 (21.9, 25.9) | 1.7 (1.5, 1.8)  | 0.7 (0.5, 0.9) | 43 (31, 56)      | 51 (37, 66)       | 40 (33, 47)       | 34 (24, 44)       | 40 (29, 51)       | 31 (26, 37)       | 7.4 (6, 8.8)      | 8.8 (7.2, 10.4)   | 6.9 (6.2, 7.5) |
| Age 70+                | 242294   | 2919  | 23.7 (20.9, 26.7) | 1.6 (1.4, 1.8)  | 0.6 (0.4, 0.9) | 156 (98, 232)    | 181 (118, 260)    | 122 (95, 154)     | 644 (405, 957)    | 748 (488, 1072)   | 502 (392, 634)    | 5.4 (3.7, 7.1)    | 6.2 (4.3, 8.1)    | 4.2 (3.4, 4.9) |
| Female                 | 780476   | 1888  | 24.1 (18.9, 29.3) | 1.7 (1.1, 2.3)  | 0.7 (0.4, 1.1) | 106 (54, 174)    | 117 (61, 189)     | 82 (59, 112)      | 136 (69, 223)     | 150 (79, 242)     | 105 (75, 143)     | 5.6 (4.4, 6.9)    | 6.2 (4.9, 7.5)    | 4.3 (3.8, 4.9) |
| Male                   | 742439   | 1596  | 23.7 (18.5, 28.9) | 1.7 (1.1, 2.2)  | 0.7 (0.3, 1)   | 93 (63, 129)     | 115 (81, 156)     | 79 (66, 95)       | 125 (85, 174)     | 156 (110, 210)    | 107 (90, 128)     | 5.8 (4.3, 7.3)    | 7.2 (5.5, 8.9)    | 5 (4.3, 5.6)   |
| All                    | 1522915  | 3495  | 23.9 (20.2, 27.6) | 1.7 (1.3, 2.1)  | 0.7 (0.5, 0.9) | 199 (139, 273)   | 232 (168, 312)    | 161 (134, 193)    | 131 (91, 179)     | 153 (110, 205)    | 106 (88, 127)     | 5.7 (4.7, 6.7)    | 6.6 (5.6, 7.7)    | 4.6 (4.2, 5)   |
| <b>Somalia</b>         |          |       |                   |                 |                |                  |                   |                   |                   |                   |                   |                   |                   |                |
| Age 25-69              | 209427   | 216   | 10.9 (10, 11.8)   | 3.8 (3.5, 4.1)  | 0.7 (0.6, 0.8) | 50 (37, 65)      | 50 (37, 65)       | 8 (4, 11)         | 240 (178, 310)    | 240 (178, 310)    | 36 (21, 54)       | 23.4 (20.5, 26.4) | 23.3 (20.4, 26.3) | 3.5 (2.2, 4.7) |
| Age 70+                | 9339     | 77    | 10.8 (9.6, 12.2)  | 3.7 (3.2, 4.2)  | 0.6 (0.4, 0.8) | 12 (7, 18)       | 12 (7, 18)        | 2 (1, 3)          | 1283 (725, 1876)  | 1283 (725, 1876)  | 165 (67, 303)     | 15.5 (12.3, 18.9) | 15.6 (12.4, 18.9) | 2 (0.9, 3.2)   |
| Female                 | 106818   | 99    | 11.1 (8.7, 13.5)  | 3.9 (2.8, 4.9)  | 0.7 (0.3, 1)   | 20 (14, 26)      | 20 (14, 26)       | 3 (2, 5)          | 186 (128, 247)    | 186 (128, 247)    | 29 (15, 46)       | 20 (16.6, 23.4)   | 20 (16.5, 23.6)   | 3.1 (1.7, 4.6) |
| Male                   | 111948   | 194   | 10.8 (8.4, 13.2)  | 3.8 (2.8, 4.9)  | 0.7 (0.3, 1)   | 42 (30, 56)      | 42 (30, 56)       | 6 (3, 10)         | 378 (267, 503)    | 378 (267, 503)    | 54 (28, 87)       | 21.9 (18.2, 25.9) | 21.9 (18.1, 25.4) | 3.1 (1.5, 4.7) |
| All                    | 218766   | 292   | 11 (9.3, 12.7)    | 3.9 (3.1, 4.6)  | 0.7 (0.4, 0.9) | 62 (48, 77)      | 62 (48, 77)       | 9 (6, 13)         | 285 (218, 353)    | 285 (218, 353)    | 42 (26, 60)       | 21.4 (18.6, 23.8) | 21.3 (18.6, 24)   | 3.1 (2.1, 4.2) |
| <b>South Africa</b>    |          |       |                   |                 |                |                  |                   |                   |                   |                   |                   |                   |                   |                |
| Age 25-69              | 3260135  | 1312  | 8.9 (8.8, 9)      | 5.5 (5.4, 5.6)  | 1.1 (1.1, 1.2) | 34 (24, 45)      | 238 (181, 305)    | 41 (27, 58)       | 10 (7, 14)        | 73 (55, 94)       | 13 (8, 18)        | 2.6 (2, 3.2)      | 18.1 (15.9, 20.4) | 3.1 (2.2, 4.1) |
| Age 70+                | 146190   | 904   | 8.9 (8.7, 9)      | 5.3 (5.2, 5.5)  | 1.1 (0.9, 1.2) | 16 (10, 24)      | 114 (81, 152)     | 17 (8, 27)        | 112 (68, 164)     | 780 (554, 1039)   | 114 (58, 183)     | 1.8 (1.1, 2.5)    | 12.6 (9.8, 15.6)  | 1.8 (0.9, 2.8) |
| Female                 | 1747340  | 1043  | 9 (7, 11)         | 5.6 (4.2, 7)    | 1.1 (0.7, 1.6) | 25 (17, 35)      | 158 (116, 204)    | 26 (15, 40)       | 14 (9, 20)        | 90 (66, 117)      | 15 (9, 23)        | 2.4 (1.7, 3.1)    | 15.1 (12.4, 17.8) | 2.5 (1.5, 3.5) |
| Male                   | 1658985  | 1177  | 8.8 (6.9, 10.7)   | 5.4 (4, 6.8)    | 1.1 (0.7, 1.5) | 25 (18, 34)      | 194 (144, 250)    | 31 (19, 46)       | 15 (11, 21)       | 117 (87, 151)     | 19 (12, 28)       | 2.2 (1.5, 2.8)    | 16.5 (13.6, 19.6) | 2.7 (1.5, 3.8) |
| All                    | 3406325  | 2225  | 8.9 (7.5, 10.3)   | 5.5 (4.5, 6.5)  | 1.1 (0.8, 1.4) | 50 (38, 64)      | 352 (281, 424)    | 58 (40, 77)       | 15 (11, 19)       | 103 (82, 124)     | 17 (12, 23)       | 2.3 (1.8, 2.7)    | 15.8 (13.8, 17.8) | 2.6 (1.8, 3.3) |
| <b>South Korea</b>     |          |       |                   |                 |                |                  |                   |                   |                   |                   |                   |                   |                   |                |
| Age 25-69              | 23638756 | 9104  | 10.8 (10, 11.5)   | 5 (4.6, 5.4)    | 1.1 (1, 1.1)   | 151 (125, 179)   | 1331 (1112, 1571) | 702 (584, 827)    | 6 (5, 8)          | 56 (47, 66)       | 30 (25, 35)       | 1.7 (1.4, 1.9)    | 14.6 (12.9, 16.6) | 7.7 (6.7, 8.7) |
| Age 70+                | 1323453  | 8009  | 10.7 (9.4, 12)    | 4.8 (4.2, 5.4)  | 1 (0.9, 1.1)   | 84 (60, 110)     | 801 (582, 1035)   | 381 (282, 506)    | 63 (46, 83)       | 605 (440, 782)    | 288 (213, 382)    | 1 (0.8, 1.3)      | 10 (7.6, 12.2)    | 4.7 (3.6, 5.8) |
| Female                 | 12782129 | 8023  | 10.8 (8.5, 13.2)  | 5 (3.7, 6.3)    | 1.1 (0.7, 1.5) | 102 (79, 131)    | 924 (719, 1181)   | 481 (370, 616)    | 8 (6, 10)         | 72 (56, 92)       | 38 (29, 48)       | 1.3 (1, 1.5)      | 11.5 (9.6, 13.4)  | 6 (4.9, 7.1)   |
| Male                   | 12180080 | 9149  | 10.7 (8.3, 13)    | 4.9 (3.7, 6.2)  | 1 (0.7, 1.4)   | 132 (105, 160)   | 1207 (973, 1445)  | 601 (480, 723)    | 11 (9, 13)        | 99 (80, 119)      | 49 (39, 59)       | 1.4 (1.1, 1.7)    | 13.2 (10.9, 15.6) | 6.6 (5.4, 7.8) |
| All                    | 24962209 | 17189 | 10.8 (9.1, 12.5)  | 5 (4.1, 5.9)    | 1.1 (0.8, 1.3) | 234 (196, 275)   | 2131 (1805, 2465) | 1083 (933, 1256)  | 9 (8, 11)         | 85 (72, 99)       | 43 (37, 50)       | 1.4 (1.2, 1.6)    | 12.4 (11, 13.8)   | 6.3 (5.5, 7.2) |
| <b>Spain</b>           |          |       |                   |                 |                |                  |                   |                   |                   |                   |                   |                   |                   |                |
| Age 25-69              | 30174727 | 5565  | 11.7 (11.3, 12)   | 6.4 (5.9, 6.9)  | 0.9 (0.9, 0.9) | 137 (103, 184)   | 863 (716, 1025)   | 383 (326, 448)    | 5 (3, 6)          | 29 (24, 34)       | 13 (11, 15)       | 2.5 (1.9, 3)      | 15.5 (13.6, 17.3) | 6.9 (6.2, 7.6) |
| Age 70+                | 3574236  | 18279 | 11.7 (11.1, 12.3) | 6.1 (5.3, 6.9)  | 0.9 (0.8, 0.9) | 327 (194, 518)   | 1929 (1380, 2504) | 736 (574, 913)    | 92 (54, 145)      | 540 (386, 701)    | 206 (160, 256)    | 1.8 (1, 2.5)      | 10.6 (8.2, 12.9)  | 4 (3.3, 4.7)   |

|                    |          |       |                   |                |                |                   |                   |                   |                   |                   |                |                   |                   |                |
|--------------------|----------|-------|-------------------|----------------|----------------|-------------------|-------------------|-------------------|-------------------|-------------------|----------------|-------------------|-------------------|----------------|
| Female             | 17290503 | 13515 | 11.8 (9.3, 14.4)  | 6.4 (4.8, 8)   | 0.9 (0.5, 1.3) | 258 (140, 436)    | 1468 (961, 2011)  | 579 (433, 740)    | 15 (8, 25)        | 85 (56, 116)      | 34 (25, 43)    | 1.9 (1.4, 2.4)    | 10.9 (9.1, 12.7)  | 4.3 (3.7, 4.8) |
| Male               | 16458460 | 10344 | 11.6 (9, 14.1)    | 6.3 (4.7, 7.9) | 0.9 (0.5, 1.2) | 207 (142, 287)    | 1325 (1060, 1607) | 540 (454, 632)    | 13 (9, 17)        | 80 (64, 98)       | 33 (28, 38)    | 2 (1.4, 2.6)      | 12.8 (10.6, 15.1) | 5.2 (4.5, 5.9) |
| All                | 33748963 | 23841 | 11.7 (9.9, 13.5)  | 6.4 (5.2, 7.5) | 0.9 (0.6, 1.2) | 464 (325, 658)    | 2792 (2218, 3378) | 1119 (948, 1304)  | 14 (10, 19)       | 83 (66, 100)      | 33 (28, 39)    | 1.9 (1.5, 2.4)    | 11.7 (10.4, 13)   | 4.7 (4.2, 5.1) |
| <b>Sri Lanka</b>   |          |       |                   |                |                |                   |                   |                   |                   |                   |                |                   |                   |                |
| Age 25-69          | 27649404 | 9553  | 21.9 (20.3, 23.4) | 1.6 (1.5, 1.8) | 0.9 (0.8, 1.1) | 407 (296, 535)    | 1202 (965, 1447)  | 496 (417, 573)    | 15 (11, 19)       | 43 (35, 52)       | 18 (15, 21)    | 4.3 (3.4, 5.2)    | 12.6 (10.9, 14.2) | 5.2 (4.6, 5.7) |
| Age 70+            | 5769864  | 52978 | 21.8 (19.3, 24.5) | 1.6 (1.3, 1.8) | 0.9 (0.7, 1.1) | 1570 (962, 2413)  | 4494 (3178, 6007) | 1666 (1264, 2115) | 272 (167, 418)    | 779 (551, 1041)   | 289 (219, 367) | 3 (1.8, 4)        | 8.5 (6.6, 10.5)   | 3.1 (2.5, 3.7) |
| Female             | 17179670 | 31727 | 22.1 (17.3, 26.9) | 1.6 (1.1, 2.2) | 1 (0.6, 1.3)   | 1006 (512, 1755)  | 2714 (1643, 3997) | 1053 (715, 1454)  | 59 (30, 102)      | 158 (96, 233)     | 61 (42, 85)    | 3.2 (2.3, 4)      | 8.6 (7, 10.1)     | 3.3 (2.9, 3.8) |
| Male               | 16239598 | 30763 | 21.7 (16.9, 26.5) | 1.6 (1.1, 2.2) | 0.9 (0.5, 1.3) | 971 (635, 1440)   | 2982 (2215, 3827) | 1109 (882, 1370)  | 60 (39, 89)       | 184 (136, 236)    | 68 (54, 84)    | 3.1 (2.2, 4.1)    | 9.7 (7.9, 11.5)   | 3.6 (3, 4.2)   |
| All                | 33419268 | 62535 | 21.9 (18.5, 25.3) | 1.6 (1.2, 2)   | 0.9 (0.7, 1.2) | 1977 (1340, 2833) | 5696 (4377, 7266) | 2162 (1748, 2639) | 59 (40, 85)       | 170 (131, 217)    | 65 (52, 79)    | 3.2 (2.6, 3.8)    | 9.1 (7.9, 10.2)   | 3.5 (3.1, 3.8) |
| <b>Sudan</b>       |          |       |                   |                |                |                   |                   |                   |                   |                   |                |                   |                   |                |
| Age 25-69          | 11323677 | 10913 | 9.1 (8.4, 9.9)    | 4.7 (4.3, 5.2) | 1.1 (0.8, 1.3) | 2364 (1981, 2791) | 2364 (1981, 2791) | 621 (441, 837)    | 209 (175, 246)    | 209 (175, 246)    | 55 (39, 74)    | 21.6 (19.3, 24)   | 21.7 (19.3, 24)   | 5.7 (4.3, 7)   |
| Age 70+            | 1072815  | 18269 | 9.1 (7.9, 10.3)   | 4.6 (3.9, 5.3) | 1 (0.6, 1.4)   | 2741 (2105, 3339) | 2741 (2105, 3339) | 624 (370, 906)    | 2555 (1962, 3112) | 2555 (1962, 3112) | 582 (345, 844) | 15 (12.1, 18)     | 15 (11.9, 18)     | 3.4 (2, 4.8)   |
| Female             | 6398019  | 10321 | 9.2 (7.2, 11.3)   | 4.8 (3.6, 6)   | 1.1 (0.7, 1.5) | 1703 (1297, 2103) | 1703 (1297, 2103) | 417 (249, 602)    | 266 (203, 329)    | 266 (203, 329)    | 65 (39, 94)    | 16.5 (14.1, 19.2) | 16.5 (14, 19)     | 4 (2.8, 5.3)   |
| Male               | 5998473  | 18831 | 9 (7, 11)         | 4.7 (3.5, 5.9) | 1 (0.7, 1.4)   | 3403 (2779, 3965) | 3403 (2779, 3965) | 828 (546, 1119)   | 567 (463, 661)    | 567 (463, 661)    | 138 (91, 187)  | 18.1 (15.5, 20.7) | 18.1 (15.3, 20.9) | 4.4 (3, 5.7)   |
| All                | 12396492 | 29121 | 9.1 (7.7, 10.6)   | 4.7 (3.9, 5.6) | 1.1 (0.8, 1.3) | 5106 (4355, 5863) | 5106 (4355, 5863) | 1245 (919, 1595)  | 412 (351, 473)    | 412 (351, 473)    | 100 (74, 129)  | 17.5 (15.6, 19.4) | 17.5 (15.7, 19.4) | 4.3 (3.3, 5.3) |
| <b>Suriname</b>    |          |       |                   |                |                |                   |                   |                   |                   |                   |                |                   |                   |                |
| Age 25-69          | 16629951 | 3289  | 7.2 (6.7, 7.7)    | 6.5 (6, 7)     | 0.6 (0.5, 0.6) | 52 (36, 74)       | 514 (408, 627)    | 228 (145, 319)    | 3 (2, 4)          | 31 (25, 38)       | 14 (9, 19)     | 1.6 (1.1, 2)      | 15.6 (13.5, 17.7) | 7 (4.9, 9)     |
| Age 70+            | 895298   | 3722  | 7.2 (6.3, 8.1)    | 6.3 (5.5, 7.1) | 0.5 (0.4, 0.6) | 39 (23, 59)       | 412 (298, 525)    | 164 (84, 262)     | 43 (26, 66)       | 460 (333, 587)    | 183 (94, 293)  | 1 (0.6, 1.6)      | 11.1 (8.4, 13.7)  | 4.4 (2, 6.7)   |
| Female             | 8827447  | 3190  | 7.3 (5.7, 8.9)    | 6.6 (4.9, 8.2) | 0.6 (0.2, 0.9) | 40 (25, 61)       | 401 (303, 515)    | 173 (95, 258)     | 5 (3, 7)          | 45 (34, 58)       | 20 (11, 29)    | 1.3 (0.8, 1.7)    | 12.6 (10.3, 14.8) | 5.5 (3.1, 7.6) |
| Male               | 8697802  | 3804  | 7.1 (5.6, 8.7)    | 6.4 (4.8, 8)   | 0.5 (0.2, 0.9) | 51 (34, 72)       | 524 (414, 645)    | 219 (131, 318)    | 6 (4, 8)          | 60 (48, 74)       | 25 (15, 37)    | 1.3 (0.8, 1.9)    | 13.8 (11.1, 16.5) | 5.7 (3.2, 8.2) |
| All                | 17525249 | 6985  | 7.2 (6.1, 8.3)    | 6.5 (5.3, 7.6) | 0.6 (0.3, 0.8) | 91 (68, 120)      | 926 (770, 1092)   | 392 (271, 517)    | 5 (4, 7)          | 53 (44, 62)       | 22 (15, 29)    | 1.3 (1, 1.6)      | 13.3 (11.6, 15)   | 5.6 (4, 7.5)   |
| <b>Swaziland</b>   |          |       |                   |                |                |                   |                   |                   |                   |                   |                |                   |                   |                |
| Age 25-69          | 263209   | 157   | 9.2 (8.6, 9.9)    | 3.9 (3.5, 4.2) | 0.6 (0.5, 0.8) | 3 (2, 4)          | 20 (16, 23)       | 3 (2, 4)          | 12 (9, 17)        | 74 (61, 89)       | 11 (7, 16)     | 2 (1.5, 2.6)      | 12.5 (10.7, 14.2) | 1.9 (1.3, 2.5) |
| Age 70+            | 21817    | 207   | 9.2 (8.1, 10.3)   | 3.7 (3.2, 4.4) | 0.6 (0.4, 0.8) | 3 (2, 4)          | 18 (14, 23)       | 2 (1, 4)          | 124 (79, 196)     | 823 (624, 1063)   | 102 (49, 166)  | 1.3 (0.7, 1.9)    | 8.7 (6.5, 10.9)   | 1.1 (0.5, 1.7) |
| Female             | 143753   | 167   | 9.3 (7.3, 11.4)   | 3.9 (2.9, 5)   | 0.7 (0.3, 1)   | 3 (2, 4)          | 16 (12, 21)       | 2 (1, 4)          | 18 (12, 28)       | 113 (86, 147)     | 16 (9, 25)     | 1.5 (1, 2.2)      | 9.7 (7.8, 11.7)   | 1.4 (0.8, 1.9) |
| Male               | 141273   | 196   | 9.1 (7.1, 11.1)   | 3.8 (2.8, 4.8) | 0.6 (0.3, 0.9) | 3 (2, 5)          | 21 (17, 26)       | 3 (2, 4)          | 23 (16, 34)       | 150 (120, 183)    | 21 (13, 30)    | 1.7 (1.1, 2.3)    | 10.8 (8.6, 12.8)  | 1.5 (0.9, 2.1) |
| All                | 285026   | 364   | 9.2 (7.8, 10.7)   | 3.9 (3.1, 4.6) | 0.6 (0.4, 0.9) | 6 (4, 8)          | 38 (31, 44)       | 5 (4, 7)          | 21 (16, 27)       | 132 (110, 154)    | 18 (13, 25)    | 1.6 (1.2, 2)      | 10.3 (8.9, 11.7)  | 1.4 (1, 1.9)   |
| <b>Sweden</b>      |          |       |                   |                |                |                   |                   |                   |                   |                   |                |                   |                   |                |
| Age 25-69          | 411279   | 232   | 13.9 (13.7, 14.1) | 4.6 (4.4, 4.7) | 0.9 (0.9, 1)   | 3 (2, 4)          | 41 (33, 51)       | 7 (4, 10)         | 8 (6, 11)         | 100 (80, 123)     | 16 (10, 24)    | 1.4 (1, 1.8)      | 17.8 (15.3, 20.2) | 2.8 (1.8, 3.9) |
| Age 70+            | 23368    | 200   | 13.9 (13.6, 14.3) | 4.4 (4.2, 4.6) | 0.9 (0.9, 1)   | 2 (1, 3)          | 25 (18, 32)       | 3 (1, 6)          | 79 (49, 118)      | 1058 (749, 1388)  | 143 (62, 260)  | 0.9 (0.5, 1.3)    | 12.4 (9.3, 15.3)  | 1.7 (0.5, 2.7) |
| Female             | 230178   | 207   | 14.1 (11, 17.1)   | 4.6 (3.4, 5.8) | 1 (0.6, 1.3)   | 2 (2, 3)          | 30 (23, 39)       | 5 (3, 7)          | 10 (7, 15)        | 131 (99, 168)     | 21 (11, 32)    | 1.1 (0.7, 1.6)    | 14.6 (12, 17.3)   | 2.3 (1.1, 3.4) |
| Male               | 204469   | 225   | 13.7 (10.7, 16.8) | 4.5 (3.3, 5.6) | 0.9 (0.5, 1.3) | 3 (2, 4)          | 36 (27, 45)       | 5 (3, 8)          | 13 (9, 19)        | 175 (132, 222)    | 25 (14, 40)    | 1.2 (0.8, 1.7)    | 15.9 (12.8, 19)   | 2.3 (1, 3.6)   |
| All                | 434647   | 431   | 13.9 (11.7, 16.1) | 4.5 (3.7, 5.4) | 0.9 (0.7, 1.2) | 5 (4, 7)          | 66 (55, 79)       | 10 (7, 14)        | 12 (9, 15)        | 152 (126, 181)    | 23 (15, 32)    | 1.2 (0.9, 1.5)    | 15.3 (13.4, 17.3) | 2.3 (1.4, 3.2) |
| <b>Switzerland</b> |          |       |                   |                |                |                   |                   |                   |                   |                   |                |                   |                   |                |
| Age 25-69          | 5328808  | 2898  | 11.7 (11.5, 11.9) | 4.9 (4.6, 5.3) | 1.6 (1.5, 1.6) | 227 (175, 274)    | 443 (344, 531)    | 152 (126, 182)    | 43 (33, 51)       | 83 (65, 100)      | 29 (24, 34)    | 7.8 (6.9, 8.7)    | 15.3 (13.5, 17)   | 5.2 (4.7, 5.7) |
| Age 70+            | 1188523  | 18570 | 11.7 (11.3, 12.1) | 4.7 (4.1, 5.3) | 1.5 (1.4, 1.6) | 1082 (753, 1421)  | 2007 (1413, 2591) | 648 (493, 823)    | 910 (633, 1196)   | 1689 (1189, 2180) | 545 (415, 692) | 5.8 (4.5, 7.1)    | 10.8 (8.5, 13.3)  | 3.5 (2.9, 4.1) |
| Female             | 3315482  | 10404 | 11.9 (9.3, 14.5)  | 4.9 (3.7, 6.2) | 1.6 (1.1, 2.1) | 633 (361, 901)    | 1125 (652, 1563)  | 380 (256, 536)    | 191 (109, 272)    | 339 (197, 471)    | 115 (77, 162)  | 6.1 (5.2, 7.1)    | 10.8 (9.3, 12.3)  | 3.7 (3.2, 4.1) |
| Male               | 3201849  | 11093 | 11.6 (9, 14.1)    | 4.9 (3.6, 6.1) | 1.5 (1.1, 2)   | 676 (463, 899)    | 1326 (927, 1725)  | 419 (328, 527)    | 211 (145, 281)    | 414 (289, 539)    | 131 (102, 164) | 6.1 (5.1, 7.1)    | 12 (10.3, 13.7)   | 3.8 (3.3, 4.3) |



|                            |         |      |                   |                |                |               |                |                |                   |                   |                 |                   |                   |                 |
|----------------------------|---------|------|-------------------|----------------|----------------|---------------|----------------|----------------|-------------------|-------------------|-----------------|-------------------|-------------------|-----------------|
| Age 25-69                  | 190305  | 68   | 6.9 (6.5, 7.5)    | 2.7 (2.4, 3)   | 0.5 (0.4, 0.6) | 1 (1, 1)      | 14 (11, 16)    | 1 (1, 2)       | 4 (3, 6)          | 71 (59, 86)       | 6 (4, 9)        | 1.2 (0.8, 1.5)    | 20 (17.7, 22.4)   | 1.6 (1.1, 2.2)  |
| Age 70+                    | 14728   | 93   | 6.9 (6.1, 7.7)    | 2.6 (2.1, 3.1) | 0.5 (0.4, 0.6) | 1 (0, 1)      | 13 (9, 16)     | 1 (0, 2)       | 46 (27, 76)       | 852 (607, 1108)   | 57 (25, 102)    | 0.7 (0.4, 1.1)    | 13.5 (10.3, 16.5) | 0.9 (0.4, 1.5)  |
| Female                     | 107114  | 59   | 7 (5.5, 8.6)      | 2.8 (2, 3.6)   | 0.5 (0.2, 0.8) | 0 (0, 1)      | 9 (6, 12)      | 1 (0, 1)       | 5 (3, 8)          | 82 (56, 112)      | 6 (3, 11)       | 0.8 (0.5, 1.2)    | 14.9 (12.6, 17.2) | 1.1 (0.7, 1.6)  |
| Male                       | 97919   | 102  | 6.9 (5.4, 8.4)    | 2.7 (1.9, 3.4) | 0.5 (0.2, 0.8) | 1 (1, 1)      | 17 (14, 21)    | 1 (1, 2)       | 10 (7, 14)        | 177 (143, 211)    | 13 (8, 19)      | 1 (0.6, 1.3)      | 17.1 (14.4, 19.9) | 1.3 (0.7, 1.8)  |
| All                        | 205033  | 160  | 6.9 (5.9, 8)      | 2.7 (2.2, 3.3) | 0.5 (0.3, 0.7) | 1 (1, 2)      | 26 (22, 31)    | 2 (1, 3)       | 7 (5, 10)         | 127 (106, 151)    | 10 (6, 13)      | 0.9 (0.7, 1.2)    | 16.3 (14.4, 18.1) | 1.2 (0.8, 1.6)  |
| <b>The Gambia</b>          |         |      |                   |                |                |               |                |                |                   |                   |                 |                   |                   |                 |
| Age 25-69                  | 595205  | 216  | 13 (12, 14.1)     | 5.3 (4.7, 5.8) | 0.8 (0.6, 0.9) | 15 (11, 19)   | 33 (25, 42)    | 9 (6, 12)      | 25 (19, 33)       | 55 (42, 71)       | 15 (10, 21)     | 6.9 (5.5, 8.2)    | 15.2 (12.9, 17.5) | 4.2 (2.9, 5.5)  |
| Age 70+                    | 19013   | 124  | 12.9 (11.2, 14.6) | 5.1 (4.1, 6)   | 0.7 (0.5, 0.9) | 6 (4, 9)      | 14 (9, 19)     | 3 (2, 5)       | 315 (198, 459)    | 712 (476, 979)    | 169 (83, 280)   | 4.8 (3.2, 6.4)    | 10.9 (7.9, 13.8)  | 2.6 (1.2, 4)    |
| Female                     | 317953  | 150  | 13.3 (10.4, 16.2) | 5.4 (4, 6.8)   | 0.8 (0.4, 1.2) | 10 (7, 14)    | 20 (14, 26)    | 5 (3, 8)       | 31 (21, 43)       | 63 (45, 82)       | 17 (11, 25)     | 6.6 (4.9, 8.2)    | 13.2 (10.6, 16)   | 3.6 (2.2, 5.2)  |
| Male                       | 296265  | 191  | 12.7 (9.9, 15.5)  | 5.2 (3.9, 6.5) | 0.8 (0.4, 1.1) | 11 (8, 15)    | 27 (20, 34)    | 7 (4, 10)      | 37 (26, 49)       | 90 (66, 115)      | 23 (14, 33)     | 5.8 (4.1, 7.4)    | 13.9 (11, 16.8)   | 3.5 (2.1, 5)    |
| All                        | 614218  | 342  | 13 (11, 15)       | 5.3 (4.3, 6.3) | 0.8 (0.5, 1)   | 21 (16, 26)   | 46 (37, 57)    | 12 (9, 16)     | 34 (27, 42)       | 76 (61, 92)       | 20 (14, 26)     | 6.1 (4.9, 7.4)    | 13.6 (11.5, 15.4) | 3.6 (2.5, 4.7)  |
| <b>Timor-Leste</b>         |         |      |                   |                |                |               |                |                |                   |                   |                 |                   |                   |                 |
| Age 25-69                  | 358240  | 312  | 16.8 (15.5, 18)   | 3.2 (3, 3.5)   | 1.2 (0.9, 1.6) | 46 (37, 55)   | 59 (49, 71)    | 27 (18, 38)    | 128 (104, 154)    | 166 (136, 198)    | 77 (50, 107)    | 14.7 (12.7, 16.7) | 19 (16.7, 21.5)   | 8.8 (6.2, 11.4) |
| Age 70+                    | 17931   | 244  | 16.7 (14.5, 18.8) | 3.1 (2.6, 3.6) | 1.1 (0.5, 1.7) | 25 (19, 33)   | 33 (24, 42)    | 13 (6, 21)     | 1418 (1039, 1819) | 1828 (1348, 2336) | 745 (351, 1196) | 10.4 (7.9, 13)    | 13.4 (10.3, 16.6) | 5.5 (2.3, 8.8)  |
| Female                     | 185852  | 289  | 17 (13.3, 20.7)   | 3.3 (2.4, 4.2) | 1.2 (0.8, 1.7) | 37 (29, 46)   | 46 (36, 57)    | 20 (12, 29)    | 198 (154, 247)    | 248 (192, 307)    | 109 (65, 155)   | 12.8 (10.7, 14.9) | 16 (13.3, 18.6)   | 7 (4.1, 10.1)   |
| Male                       | 190319  | 267  | 16.6 (12.9, 20.2) | 3.2 (2.3, 4.1) | 1.2 (0.8, 1.7) | 35 (27, 42)   | 46 (37, 56)    | 21 (12, 29)    | 181 (144, 221)    | 242 (193, 294)    | 108 (65, 151)   | 12.9 (10.5, 15.5) | 17.3 (14.1, 20.4) | 7.7 (4.5, 11.2) |
| All                        | 376171  | 554  | 16.8 (14.2, 19.4) | 3.2 (2.6, 3.8) | 1.2 (0.9, 1.5) | 71 (60, 83)   | 92 (78, 106)   | 41 (29, 53)    | 190 (160, 219)    | 245 (208, 282)    | 108 (78, 142)   | 12.9 (11.3, 14.5) | 16.6 (14.6, 18.6) | 7.4 (5.3, 9.6)  |
| <b>Togo</b>                |         |      |                   |                |                |               |                |                |                   |                   |                 |                   |                   |                 |
| Age 25-69                  | 2265349 | 908  | 13 (12, 13.9)     | 3.1 (2.8, 3.4) | 0.9 (0.7, 1)   | 62 (49, 76)   | 176 (144, 211) | 45 (32, 61)    | 27 (22, 33)       | 78 (64, 93)       | 20 (14, 27)     | 6.8 (5.7, 7.9)    | 19.4 (16.9, 21.9) | 5 (3.7, 6.3)    |
| Age 70+                    | 120298  | 847  | 12.9 (11.5, 14.6) | 3 (2.6, 3.5)   | 0.8 (0.6, 1)   | 39 (28, 52)   | 113 (84, 145)  | 25 (14, 38)    | 327 (232, 436)    | 936 (695, 1202)   | 211 (118, 315)  | 4.7 (3.4, 6)      | 13.3 (10.2, 16.2) | 3 (1.6, 4.4)    |
| Female                     | 1218674 | 919  | 13.2 (10.3, 16.1) | 3.2 (2.3, 4.1) | 0.9 (0.5, 1.2) | 54 (41, 69)   | 146 (113, 181) | 36 (24, 52)    | 44 (33, 56)       | 120 (93, 148)     | 30 (20, 43)     | 5.9 (4.7, 7.3)    | 15.9 (13, 18.7)   | 4 (2.5, 5.4)    |
| Male                       | 1166973 | 839  | 12.8 (10, 15.6)   | 3.1 (2.2, 3.9) | 0.8 (0.5, 1.2) | 47 (36, 59)   | 143 (114, 174) | 34 (23, 47)    | 40 (31, 50)       | 123 (98, 149)     | 30 (20, 41)     | 5.6 (4.2, 6.9)    | 17.1 (14, 19.9)   | 4.1 (2.5, 5.7)  |
| All                        | 2385647 | 1758 | 13 (11, 15)       | 3.1 (2.5, 3.7) | 0.9 (0.6, 1.1) | 101 (84, 120) | 289 (245, 336) | 71 (53, 91)    | 42 (35, 50)       | 121 (103, 141)    | 30 (22, 38)     | 5.8 (4.8, 6.7)    | 16.4 (14.5, 18.5) | 4 (3, 5.1)      |
| <b>Tonga</b>               |         |      |                   |                |                |               |                |                |                   |                   |                 |                   |                   |                 |
| Age 25-69                  | 41572   | 24   | 22.8 (21, 24.4)   | 2 (1.8, 2.1)   | 0.8 (0.7, 0.9) | 5 (4, 6)      | 5 (4, 6)       | 1 (1, 1)       | 126 (102, 151)    | 126 (102, 151)    | 25 (17, 35)     | 21.7 (19.3, 24.4) | 21.7 (19.1, 24.3) | 4.4 (3.2, 5.5)  |
| Age 70+                    | 4212    | 36   | 22.8 (20, 25.5)   | 1.9 (1.7, 2.2) | 0.7 (0.5, 0.9) | 5 (4, 7)      | 5 (4, 7)       | 1 (0, 1)       | 1243 (930, 1593)  | 1243 (930, 1593)  | 213 (117, 330)  | 14.5 (11.6, 17.5) | 14.5 (11.4, 17.5) | 2.5 (1.4, 3.7)  |
| Female                     | 23810   | 20   | 23 (18, 28)       | 2 (1.4, 2.6)   | 0.8 (0.4, 1.2) | 3 (2, 4)      | 3 (2, 4)       | 1 (0, 1)       | 135 (97, 180)     | 135 (97, 180)     | 25 (13, 40)     | 15.8 (13.4, 18.3) | 15.8 (13, 18.5)   | 2.9 (1.9, 3.9)  |
| Male                       | 21974   | 40   | 22.5 (17.6, 27.5) | 2 (1.4, 2.6)   | 0.8 (0.4, 1.1) | 7 (6, 9)      | 7 (6, 9)       | 1 (1, 2)       | 330 (268, 394)    | 330 (268, 394)    | 62 (43, 86)     | 18.2 (15.3, 21.2) | 18.2 (15.6, 20.9) | 3.4 (2.1, 4.6)  |
| All                        | 45784   | 60   | 22.8 (19.2, 26.3) | 2 (1.5, 2.4)   | 0.8 (0.5, 1.1) | 10 (9, 12)    | 10 (9, 12)     | 2 (1, 3)       | 228 (193, 266)    | 228 (193, 266)    | 43 (30, 57)     | 17.4 (15.4, 19.4) | 17.4 (15.6, 19.4) | 3.3 (2.4, 4.1)  |
| <b>Trinidad and Tobago</b> |         |      |                   |                |                |               |                |                |                   |                   |                 |                   |                   |                 |
| Age 25-69                  | 768395  | 864  | 8 (7.4, 8.5)      | 5.8 (5.4, 6.2) | 0.6 (0.5, 0.7) | 16 (11, 22)   | 118 (95, 140)  | 22 (14, 31)    | 20 (14, 29)       | 153 (124, 182)    | 29 (18, 41)     | 1.8 (1.3, 2.3)    | 13.6 (11.6, 15.4) | 2.6 (1.8, 3.3)  |
| Age 70+                    | 58223   | 1156 | 8 (7, 9)          | 5.6 (4.9, 6.3) | 0.6 (0.4, 0.8) | 14 (8, 22)    | 111 (82, 140)  | 18 (9, 28)     | 236 (142, 372)    | 1902 (1412, 2398) | 301 (156, 488)  | 1.2 (0.7, 1.7)    | 9.6 (7.4, 11.8)   | 1.5 (0.8, 2.3)  |
| Female                     | 436992  | 841  | 8.1 (6.3, 9.9)    | 5.9 (4.4, 7.3) | 0.6 (0.3, 1)   | 11 (7, 18)    | 88 (66, 112)   | 16 (9, 25)     | 26 (16, 42)       | 202 (152, 257)    | 37 (20, 57)     | 1.4 (0.9, 1.9)    | 10.5 (8.6, 12.5)  | 1.9 (1.2, 2.7)  |
| Male                       | 389626  | 1179 | 7.8 (6.1, 9.6)    | 5.7 (4.3, 7.1) | 0.6 (0.3, 1)   | 18 (12, 26)   | 140 (113, 169) | 24 (14, 33)    | 46 (32, 66)       | 360 (289, 433)    | 61 (36, 85)     | 1.5 (0.9, 2.1)    | 11.9 (9.7, 14.2)  | 2 (1.2, 2.8)    |
| All                        | 826618  | 2018 | 8 (6.7, 9.2)      | 5.8 (4.8, 6.8) | 0.6 (0.4, 0.9) | 29 (22, 40)   | 228 (193, 268) | 40 (28, 53)    | 36 (27, 48)       | 276 (233, 324)    | 48 (33, 65)     | 1.5 (1.1, 1.8)    | 11.3 (9.9, 12.8)  | 2 (1.4, 2.5)    |
| <b>Tunisia</b>             |         |      |                   |                |                |               |                |                |                   |                   |                 |                   |                   |                 |
| Age 25-69                  | 5531972 | 4315 | 9.8 (9.1, 10.5)   | 7.5 (6.8, 8.1) | 1 (0.9, 1)     | 101 (69, 144) | 454 (346, 576) | 266 (211, 320) | 18 (12, 26)       | 82 (63, 104)      | 48 (38, 58)     | 2.3 (1.6, 3)      | 10.5 (8.8, 12.3)  | 6.1 (5.4, 6.8)  |
| Age 70+                    | 495996  | 7365 | 9.8 (8.5, 11)     | 7.2 (6.3, 8.2) | 0.9 (0.8, 1)   | 109 (66, 167) | 542 (395, 716) | 271 (213, 341) | 220 (134, 337)    | 1092 (796, 1443)  | 546 (430, 688)  | 1.5 (0.8, 2.2)    | 7.4 (5.3, 9.4)    | 3.7 (3, 4.4)    |

|                             |          |        |                   |                 |                |                     |                      |                      |                   |                   |                   |                |                   |                  |
|-----------------------------|----------|--------|-------------------|-----------------|----------------|---------------------|----------------------|----------------------|-------------------|-------------------|-------------------|----------------|-------------------|------------------|
| Female                      | 3055668  | 4655   | 9.9 (7.7, 12.1)   | 7.6 (5.7, 9.4)  | 1 (0.6, 1.4)   | 82 (50, 132)        | 376 (265, 514)       | 208 (163, 261)       | 27 (16, 43)       | 123 (87, 168)     | 68 (53, 86)       | 1.8 (1, 2.5)   | 8.1 (6.1, 9.8)    | 4.5 (3.8, 5.2)   |
| Male                        | 2972300  | 7004   | 9.7 (7.6, 11.9)   | 7.4 (5.6, 9.2)  | 1 (0.6, 1.4)   | 128 (87, 191)       | 620 (472, 793)       | 328 (266, 398)       | 43 (29, 64)       | 209 (159, 267)    | 110 (89, 134)     | 1.8 (1.1, 2.7) | 8.9 (6.8, 10.8)   | 4.7 (3.9, 5.4)   |
| All                         | 6027968  | 11711  | 9.8 (8.3, 11.3)   | 7.5 (6.2, 8.8)  | 1 (0.7, 1.3)   | 210 (154, 284)      | 996 (819, 1204)      | 536 (456, 624)       | 35 (25, 47)       | 165 (136, 200)    | 89 (76, 104)      | 1.8 (1.3, 2.3) | 8.5 (7.1, 9.8)    | 4.6 (4.1, 5.1)   |
| <b>Turkey</b>               |          |        |                   |                 |                |                     |                      |                      |                   |                   |                   |                |                   |                  |
| Age 25-69                   | 37872102 | 37811  | 10.5 (10.2, 10.8) | 8.5 (8.1, 8.8)  | 1 (0.9, 1)     | 1083 (859, 1324)    | 3326 (2717, 3921)    | 2380 (2040, 2740)    | 29 (23, 35)       | 88 (72, 104)      | 63 (54, 72)       | 2.9 (2.3, 3.5) | 8.8 (7.4, 10.2)   | 6.3 (5.5, 7.1)   |
| Age 70+                     | 2816040  | 43763  | 10.4 (9.9, 11)    | 8.2 (7.5, 8.7)  | 0.9 (0.8, 1)   | 818 (572, 1089)     | 2640 (1955, 3369)    | 1593 (1263, 1966)    | 290 (203, 387)    | 937 (694, 1196)   | 566 (448, 698)    | 1.9 (1.3, 2.5) | 6 (4.6, 7.5)      | 3.6 (2.8, 4.5)   |
| Female                      | 20727040 | 32968  | 10.7 (8.3, 13)    | 8.5 (6.5, 10.6) | 1 (0.6, 1.4)   | 793 (587, 1041)     | 2216 (1676, 2766)    | 1517 (1246, 1837)    | 38 (28, 50)       | 107 (81, 133)     | 73 (60, 89)       | 2.4 (1.8, 2.9) | 6.7 (5.3, 8.2)    | 4.6 (3.8, 5.4)   |
| Male                        | 19961102 | 48666  | 10.3 (8, 12.6)    | 8.3 (6.3, 10.4) | 1 (0.6, 1.3)   | 1109 (839, 1406)    | 3750 (2951, 4533)    | 2456 (2057, 2883)    | 56 (42, 70)       | 188 (148, 227)    | 123 (103, 144)    | 2.3 (1.6, 2.8) | 7.7 (6.1, 9.4)    | 5 (4.2, 5.9)     |
| All                         | 40688142 | 81516  | 10.5 (8.8, 12.1)  | 8.4 (7, 9.9)    | 1 (0.7, 1.3)   | 1901 (1564, 2311)   | 5966 (5013, 6923)    | 3973 (3473, 4483)    | 47 (38, 57)       | 147 (123, 170)    | 98 (85, 110)      | 2.3 (1.9, 2.8) | 7.3 (6.3, 8.4)    | 4.9 (4.3, 5.4)   |
| <b>Turkmenistan</b>         |          |        |                   |                 |                |                     |                      |                      |                   |                   |                   |                |                   |                  |
| Age 25-69                   | 2319198  | 4351   | 11.7 (10.8, 12.6) | 5 (4.6, 5.4)    | 0.7 (0.6, 0.8) | 187 (143, 242)      | 703 (577, 848)       | 141 (94, 199)        | 81 (62, 104)      | 303 (249, 366)    | 61 (40, 86)       | 4.3 (3.4, 5.2) | 16.2 (14.2, 18.3) | 3.2 (2.3, 4.2)   |
| Age 70+                     | 148381   | 6479   | 11.7 (10.2, 13.3) | 4.8 (4.2, 5.5)  | 0.6 (0.4, 0.8) | 185 (127, 258)      | 688 (530, 853)       | 117 (62, 181)        | 1245 (854, 1738)  | 4636 (3573, 5752) | 790 (415, 1219)   | 2.9 (1.7, 3.9) | 10.6 (8.1, 13.2)  | 1.8 (0.8, 2.8)   |
| Female                      | 1286672  | 4837   | 11.9 (9.3, 14.5)  | 5 (3.7, 6.3)    | 0.7 (0.3, 1)   | 172 (119, 243)      | 579 (440, 737)       | 107 (61, 167)        | 134 (92, 189)     | 450 (342, 573)    | 84 (48, 129)      | 3.5 (2.6, 4.4) | 12 (9.9, 14.1)    | 2.2 (1.3, 3.1)   |
| Male                        | 1180907  | 5957   | 11.5 (9, 14.1)    | 5 (3.7, 6.2)    | 0.7 (0.3, 1)   | 200 (148, 264)      | 812 (656, 973)       | 151 (96, 215)        | 169 (125, 224)    | 688 (556, 824)    | 128 (81, 182)     | 3.4 (2.3, 4.4) | 13.6 (11.3, 16.1) | 2.5 (1.4, 3.6)   |
| All                         | 2467579  | 10832  | 11.7 (9.9, 13.5)  | 5 (4.1, 5.9)    | 0.7 (0.4, 0.9) | 372 (294, 458)      | 1391 (1184, 1621)    | 258 (182, 352)       | 151 (119, 185)    | 564 (480, 657)    | 105 (74, 143)     | 3.4 (2.7, 4.1) | 12.8 (11.3, 14.5) | 2.4 (1.7, 3.1)   |
| <b>Uganda</b>               |          |        |                   |                 |                |                     |                      |                      |                   |                   |                   |                |                   |                  |
| Age 25-69                   | 10032498 | 3086   | 11.1 (10.2, 12)   | 4.7 (4.1, 5.3)  | 0.8 (0.6, 0.9) | 98 (67, 134)        | 509 (397, 627)       | 129 (87, 181)        | 10 (7, 13)        | 51 (40, 62)       | 13 (9, 18)        | 3.2 (2.2, 4.1) | 16.5 (14, 18.8)   | 4.2 (2.9, 5.5)   |
| Age 70+                     | 485676   | 2847   | 11 (9.6, 12.3)    | 4.5 (3.6, 5.4)  | 0.7 (0.5, 0.9) | 61 (35, 99)         | 320 (227, 432)       | 70 (39, 111)         | 125 (71, 203)     | 659 (466, 890)    | 144 (80, 228)     | 2.1 (1.1, 3.1) | 11.2 (8.7, 13.8)  | 2.5 (1.3, 3.7)   |
| Female                      | 5302451  | 2470   | 11.1 (8.7, 13.6)  | 4.7 (3.5, 6)    | 0.8 (0.4, 1.1) | 65 (39, 98)         | 321 (235, 423)       | 79 (47, 117)         | 12 (7, 18)        | 61 (44, 80)       | 15 (9, 22)        | 2.6 (1.5, 3.7) | 13 (10.4, 15.8)   | 3.2 (1.8, 4.6)   |
| Male                        | 5215723  | 3483   | 11 (8.6, 13.4)    | 4.6 (3.4, 5.8)  | 0.8 (0.4, 1.1) | 94 (63, 131)        | 508 (396, 635)       | 120 (77, 168)        | 18 (12, 25)       | 97 (76, 122)      | 23 (15, 32)       | 2.7 (1.6, 3.8) | 14.6 (11.6, 17.5) | 3.5 (1.9, 5)     |
| All                         | 10518174 | 5914   | 11.1 (9.3, 12.8)  | 4.7 (3.8, 5.5)  | 0.8 (0.5, 1)   | 159 (116, 211)      | 829 (685, 991)       | 199 (146, 261)       | 15 (11, 20)       | 79 (65, 94)       | 19 (14, 25)       | 2.7 (1.9, 3.5) | 14 (12, 16.1)     | 3.4 (2.4, 4.4)   |
| <b>Ukraine</b>              |          |        |                   |                 |                |                     |                      |                      |                   |                   |                   |                |                   |                  |
| Age 25-69                   | 27536075 | 74831  | 12.1 (11.2, 12.9) | 8.4 (7.8, 9)    | 1 (0.9, 1)     | 3712 (2775, 4817)   | 6223 (4854, 7787)    | 4220 (3632, 4842)    | 135 (101, 175)    | 226 (176, 283)    | 153 (132, 176)    | 5 (4, 6)       | 8.3 (6.9, 9.7)    | 5.6 (5.1, 6.2)   |
| Age 70+                     | 5283878  | 247939 | 12.1 (10.5, 13.6) | 8.1 (7.1, 9.1)  | 0.9 (0.8, 1)   | 9059 (5976, 13577)  | 15021 (10531, 20613) | 8760 (7058, 10648)   | 1714 (1131, 2570) | 2843 (1993, 3901) | 1658 (1336, 2015) | 3.7 (2.3, 5.1) | 6.1 (4, 8.1)      | 3.5 (2.8, 4.3)   |
| Female                      | 18371204 | 187197 | 12.2 (9.5, 14.9)  | 8.4 (6.3, 10.4) | 1 (0.6, 1.3)   | 7344 (4484, 11495)  | 11589 (7529, 17034)  | 7104 (5493, 8819)    | 400 (244, 626)    | 631 (410, 927)    | 387 (299, 480)    | 3.9 (2.9, 4.8) | 6.2 (4.9, 7.5)    | 3.8 (3.3, 4.2)   |
| Male                        | 14448749 | 135152 | 11.9 (9.3, 14.5)  | 8.3 (6.3, 10.3) | 0.9 (0.6, 1.3) | 5426 (3702, 7487)   | 9655 (7027, 12494)   | 5876 (4992, 6886)    | 376 (256, 518)    | 668 (486, 865)    | 407 (345, 477)    | 4 (2.9, 5.3)   | 7.1 (5.4, 8.9)    | 4.4 (3.8, 4.9)   |
| All                         | 32819953 | 322852 | 12.1 (10.2, 13.9) | 8.3 (6.9, 9.8)  | 1 (0.7, 1.2)   | 12770 (9457, 17211) | 21244 (16566, 27002) | 12980 (11140, 15004) | 389 (288, 524)    | 647 (505, 823)    | 395 (339, 457)    | 4 (3.2, 4.7)   | 6.6 (5.6, 7.7)    | 4 (3.7, 4.4)     |
| <b>United Arab Emirates</b> |          |        |                   |                 |                |                     |                      |                      |                   |                   |                   |                |                   |                  |
| Age 25-69                   | 5002160  | 1932   | 10.7 (9.6, 11.8)  | 5.2 (4.7, 5.8)  | 1.1 (1, 1.1)   | 59 (42, 82)         | 334 (265, 420)       | 159 (129, 194)       | 12 (8, 16)        | 67 (53, 84)       | 32 (26, 39)       | 3 (2.1, 4)     | 17.3 (14.3, 20.3) | 8.3 (7, 9.6)     |
| Age 70+                     | 19127    | 367    | 10.7 (9.4, 12)    | 5.1 (4.4, 5.8)  | 1 (0.9, 1.1)   | 6 (4, 10)           | 37 (28, 48)          | 15 (12, 19)          | 332 (209, 502)    | 1959 (1452, 2523) | 799 (637, 991)    | 1.7 (1, 2.5)   | 10.2 (7.7, 12.7)  | 4.2 (3.4, 4.9)   |
| Female                      | 1184391  | 320    | 10.9 (8.5, 13.3)  | 5.3 (4, 6.7)    | 1.1 (0.7, 1.5) | 9 (6, 12)           | 44 (34, 54)          | 21 (17, 25)          | 7 (5, 10)         | 37 (29, 46)       | 18 (14, 21)       | 2.7 (1.6, 3.9) | 13.6 (10.4, 16.8) | 6.5 (5.4, 7.7)   |
| Male                        | 3836896  | 1978   | 10.7 (8.3, 13)    | 5.2 (3.9, 6.6)  | 1.1 (0.7, 1.5) | 57 (39, 80)         | 328 (259, 410)       | 154 (124, 186)       | 15 (10, 21)       | 85 (68, 107)      | 40 (32, 49)       | 2.9 (1.7, 4)   | 16.6 (13, 20.3)   | 7.8 (6.4, 9.3)   |
| All                         | 5021287  | 2289   | 10.7 (9, 12.4)    | 5.3 (4.3, 6.2)  | 1.1 (0.8, 1.4) | 65 (48, 89)         | 372 (302, 455)       | 175 (144, 208)       | 13 (10, 18)       | 74 (60, 91)       | 35 (29, 41)       | 2.8 (1.9, 3.7) | 16.2 (13.3, 19.2) | 7.6 (6.6, 8.7)   |
| <b>United Kingdom</b>       |          |        |                   |                 |                |                     |                      |                      |                   |                   |                   |                |                   |                  |
| Age 25-69                   | 35765125 | 21181  | 13 (12.9, 13.2)   | 5.4 (5.2, 5.5)  | 1.4 (1.4, 1.5) | 1343 (1087, 1624)   | 3010 (2448, 3627)    | 2248 (1928, 2563)    | 38 (30, 45)       | 84 (68, 101)      | 63 (54, 72)       | 6.4 (5.5, 7.1) | 14.2 (12.5, 15.9) | 10.6 (9.7, 11.5) |
| Age 70+                     | 7340526  | 89487  | 13 (12.8, 13.3)   | 5.1 (5, 5.4)    | 1.4 (1.3, 1.5) | 4105 (3036, 5346)   | 8818 (6718, 11193)   | 6214 (5011, 7548)    | 559 (414, 728)    | 1201 (915, 1525)  | 846 (683, 1028)   | 4.6 (3.6, 5.6) | 9.9 (7.9, 11.8)   | 7 (6, 8)         |
| Female                      | 22303320 | 51080  | 13.2 (10.3, 16)   | 5.4 (4, 6.8)    | 1.5 (1, 1.9)   | 2529 (1637, 3661)   | 5142 (3398, 7293)    | 3749 (2720, 4847)    | 113 (73, 164)     | 231 (152, 327)    | 168 (122, 217)    | 5 (4.2, 5.8)   | 10.1 (8.6, 11.6)  | 7.4 (6.6, 8.2)   |
| Male                        | 20802331 | 59547  | 12.9 (10, 15.7)   | 5.3 (3.9, 6.6)  | 1.4 (1, 1.9)   | 2919 (2184, 3675)   | 6686 (5084, 8216)    | 4712 (4008, 5583)    | 140 (105, 177)    | 321 (244, 395)    | 227 (193, 268)    | 4.9 (4.1, 5.7) | 11.2 (9.5, 13.1)  | 7.9 (7, 8.7)     |

| Global Health and Demographic Statistics - Q3 2023 |         |            |           |                         |                             |                                |                              |                      |                       |                     |                       |                         |                             |                         |                   |
|----------------------------------------------------|---------|------------|-----------|-------------------------|-----------------------------|--------------------------------|------------------------------|----------------------|-----------------------|---------------------|-----------------------|-------------------------|-----------------------------|-------------------------|-------------------|
| Region                                             | Country | Population | Age Group | Life Expectancy (Years) | Infant Mortality Rate (IMR) | Maternal Mortality Ratio (MMR) | Healthcare Expenditure (USD) | Renewable Energy (%) | Urbanization (%)      | Employment Rate (%) | Gender Equality Index | Human Development Index | Corruption Perception Index | Trust in Government (%) |                   |
| All                                                |         | 43105651   | 110419    | 13 (11, 15)             | 5.3 (4.4, 6.3)              | 1.4 (1.1, 1.8)                 | 5448 (4333, 6711)            | 11828 (9569, 14246)  | 8461 (7195, 9860)     | 126 (101, 156)      | 274 (222, 330)        | 196 (167, 229)          | 4.9 (4.4, 5.5)              | 10.7 (9.6, 11.8)        | 7.6 (7, 8.2)      |
| <b>United States</b>                               |         |            |           |                         |                             |                                |                              |                      |                       |                     |                       |                         |                             |                         |                   |
| Age 25-69                                          |         | 175005285  | 128433    | 11.8 (11.7, 12)         | 6.8 (6.7, 6.9)              | 2.8 (2.7, 2.9)                 | 5539 (4468, 6522)            | 15057 (12247, 17735) | 31008 (27462, 34658)  | 32 (26, 37)         | 86 (70, 101)          | 177 (157, 198)          | 4.3 (3.8, 4.9)              | 11.7 (10.5, 13.1)       | 24.2 (22.4, 26.1) |
| Age 70+                                            |         | 27997375   | 433088    | 11.9 (11.6, 12.1)       | 6.5 (6.3, 6.7)              | 2.6 (2.4, 2.8)                 | 13362 (9052, 18284)          | 34887 (24335, 46372) | 65603 (52502, 80223)  | 477 (323, 653)      | 1246 (869, 1656)      | 2343 (1875, 2865)       | 3.1 (2.4, 3.7)              | 8.1 (6.4, 9.8)          | 15.1 (13.1, 17.2) |
| Female                                             |         | 104692521  | 285312    | 12 (9.4, 14.6)          | 6.8 (5.1, 8.5)              | 2.8 (2.1, 3.5)                 | 9801 (6180, 14018)           | 23888 (15429, 33371) | 46560 (34803, 60144)  | 94 (59, 134)        | 228 (147, 319)        | 445 (332, 574)          | 3.4 (2.9, 4)                | 8.4 (7.1, 9.6)          | 16.3 (14.7, 17.8) |
| Male                                               |         | 98310139   | 276521    | 11.7 (9.1, 14.3)        | 6.7 (5, 8.3)                | 2.7 (2.1, 3.4)                 | 9099 (7035, 11532)           | 26056 (20341, 32824) | 50051 (42414, 58104)  | 93 (72, 117)        | 265 (207, 334)        | 509 (431, 591)          | 3.3 (2.7, 3.8)              | 9.4 (7.9, 10.8)         | 18 (16.3, 19.7)   |
| All                                                |         | 203002660  | 562068    | 11.8 (10, 13.7)         | 6.7 (5.5, 7.9)              | 2.8 (2.3, 3.3)                 | 18901 (14411, 24096)         | 49944 (39067, 61704) | 96611 (83033, 112071) | 93 (71, 119)        | 246 (192, 304)        | 476 (409, 552)          | 3.4 (3, 3.8)                | 8.9 (7.9, 9.8)          | 17.2 (16, 18.4)   |
| <b>Uruguay</b>                                     |         |            |           |                         |                             |                                |                              |                      |                       |                     |                       |                         |                             |                         |                   |
| Age 25-69                                          |         | 1763897    | 1111      | 9.6 (8.9, 10.3)         | 5.5 (5.1, 5.8)              | 0.9 (0.9, 1)                   | 19 (12, 27)                  | 155 (121, 191)       | 59 (49, 71)           | 11 (7, 15)          | 88 (68, 108)          | 33 (28, 40)             | 1.7 (1.3, 2.1)              | 14 (12.3, 15.7)         | 5.3 (4.7, 5.9)    |
| Age 70+                                            |         | 330791     | 3683      | 9.7 (8.3, 11.1)         | 5.3 (4.6, 5.9)              | 0.9 (0.8, 0.9)                 | 40 (24, 65)                  | 362 (262, 468)       | 120 (94, 152)         | 122 (74, 197)       | 1095 (793, 1416)      | 362 (284, 461)          | 1.1 (0.6, 1.5)              | 9.8 (7.6, 12)           | 3.2 (2.7, 3.9)    |
| Female                                             |         | 1118344    | 2232      | 9.7 (7.6, 11.9)         | 5.5 (4.1, 6.9)              | 0.9 (0.6, 1.3)                 | 26 (14, 47)                  | 225 (148, 313)       | 79 (58, 106)          | 23 (12, 42)         | 201 (132, 279)        | 71 (52, 95)             | 1.2 (0.8, 1.6)              | 10.1 (8.5, 11.7)        | 3.6 (3.1, 4.1)    |
| Male                                               |         | 976344     | 2569      | 9.5 (7.4, 11.6)         | 5.4 (4, 6.7)                | 0.9 (0.5, 1.3)                 | 33 (22, 50)                  | 293 (225, 367)       | 99 (80, 120)          | 34 (23, 51)         | 300 (230, 376)        | 102 (82, 123)           | 1.3 (0.9, 1.7)              | 11.4 (9.5, 13.2)        | 3.9 (3.3, 4.4)    |
| All                                                |         | 2094688    | 4790      | 9.6 (8.1, 11.1)         | 5.4 (4.5, 6.4)              | 0.9 (0.7, 1.2)                 | 59 (41, 84)                  | 518 (414, 629)       | 179 (149, 214)        | 28 (20, 40)         | 247 (198, 300)        | 85 (71, 102)            | 1.2 (1, 1.5)                | 10.8 (9.5, 12.1)        | 3.7 (3.3, 4.1)    |
| <b>Uzbekistan</b>                                  |         |            |           |                         |                             |                                |                              |                      |                       |                     |                       |                         |                             |                         |                   |
| Age 25-69                                          |         | 12350715   | 18981     | 10.7 (9.9, 11.4)        | 5.2 (4.7, 5.6)              | 1 (0.9, 1)                     | 474 (354, 630)               | 2979 (2463, 3529)    | 1185 (1010, 1388)     | 38 (29, 51)         | 241 (199, 286)        | 96 (82, 112)            | 2.5 (1.8, 3.1)              | 15.7 (13.5, 17.9)       | 6.2 (5.5, 6.9)    |
| Age 70+                                            |         | 876630     | 37690     | 10.6 (9.3, 12.1)        | 5 (4.3, 5.7)                | 0.9 (0.8, 1)                   | 639 (395, 975)               | 3923 (2963, 4973)    | 1350 (1084, 1634)     | 729 (450, 1112)     | 4475 (3380, 5673)     | 1540 (1236, 1864)       | 1.7 (1, 2.4)                | 10.4 (8.2, 12.9)        | 3.6 (2.9, 4.2)    |
| Female                                             |         | 6814918    | 26806     | 10.9 (8.5, 13.3)        | 5.2 (3.9, 6.5)              | 1 (0.6, 1.4)                   | 570 (365, 851)               | 3050 (2259, 3890)    | 1136 (917, 1380)      | 84 (54, 125)        | 447 (331, 571)        | 167 (135, 202)          | 2.1 (1.5, 2.9)              | 11.4 (9.2, 13.5)        | 4.2 (3.6, 4.9)    |
| Male                                               |         | 6412427    | 29875     | 10.4 (8.1, 12.7)        | 5.1 (3.8, 6.5)              | 1 (0.6, 1.3)                   | 543 (370, 761)               | 3852 (3107, 4709)    | 1399 (1180, 1658)     | 85 (58, 119)        | 601 (485, 734)        | 218 (184, 259)          | 1.8 (1.2, 2.4)              | 12.9 (10.5, 15.2)       | 4.7 (3.9, 5.4)    |
| All                                                |         | 13227345   | 56742     | 10.7 (9, 12.4)          | 5.2 (4.2, 6.1)              | 1 (0.7, 1.3)                   | 1113 (808, 1481)             | 6902 (5763, 8096)    | 2535 (2194, 2873)     | 84 (61, 112)        | 522 (436, 612)        | 192 (166, 217)          | 2 (1.5, 2.4)                | 12.2 (10.6, 13.7)       | 4.5 (3.9, 5)      |
| <b>Vanuatu</b>                                     |         |            |           |                         |                             |                                |                              |                      |                       |                     |                       |                         |                             |                         |                   |
| Age 25-69                                          |         | 95214      | 103       | 25.7 (23.7, 27.7)       | 1.5 (1.4, 1.6)              | 0.7 (0.6, 0.9)                 | 24 (17, 32)                  | 24 (17, 32)          | 4 (2, 6)              | 251 (178, 337)      | 251 (178, 337)        | 43 (26, 64)             | 23.5 (20.7, 26.3)           | 23.3 (20.6, 26)         | 4 (2.9, 5.2)      |
| Age 70+                                            |         | 4741       | 42        | 25.6 (22.2, 28.7)       | 1.5 (1.3, 1.7)              | 0.7 (0.5, 0.9)                 | 7 (4, 10)                    | 7 (4, 10)            | 1 (0, 2)              | 1380 (761, 2068)    | 1380 (761, 2068)      | 198 (86, 346)           | 15.7 (12.1, 19.2)           | 15.7 (12.1, 19)         | 2.2 (1.1, 3.4)    |
| Female                                             |         | 49849      | 46        | 26 (20.4, 31.6)         | 1.5 (1, 2)                  | 0.7 (0.4, 1.1)                 | 9 (6, 13)                    | 9 (6, 13)            | 1 (1, 2)              | 182 (119, 253)      | 182 (119, 253)        | 30 (17, 46)             | 20.1 (16.9, 23.6)           | 20 (16.7, 23.2)         | 3.3 (1.9, 4.6)    |
| Male                                               |         | 50106      | 99        | 25.4 (19.8, 31)         | 1.5 (1, 2)                  | 0.7 (0.4, 1.1)                 | 21 (14, 29)                  | 21 (14, 29)          | 4 (2, 6)              | 427 (286, 578)      | 427 (286, 578)        | 71 (40, 112)            | 21.5 (17.7, 25)             | 21.6 (18.2, 25.2)       | 3.6 (2.2, 5.1)    |
| All                                                |         | 99955      | 143       | 25.7 (21.7, 29.7)       | 1.5 (1.1, 1.9)              | 0.7 (0.5, 1)                   | 30 (23, 39)                  | 30 (23, 39)          | 5 (3, 7)              | 305 (228, 394)      | 305 (228, 394)        | 51 (32, 71)             | 21.2 (18.6, 23.7)           | 21.3 (18.9, 23.7)       | 3.5 (2.5, 4.5)    |
| <b>Venezuela</b>                                   |         |            |           |                         |                             |                                |                              |                      |                       |                     |                       |                         |                             |                         |                   |
| Age 25-69                                          |         | 14037213   | 10343     | 7.6 (7, 8.1)            | 7.5 (6.9, 8.1)              | 1.4 (1.3, 1.4)                 | 239 (167, 342)               | 1088 (873, 1352)     | 1031 (887, 1173)      | 17 (12, 24)         | 78 (62, 96)           | 73 (63, 84)             | 2.3 (1.6, 3)                | 10.5 (8.7, 12.2)        | 10 (8.9, 11.1)    |
| Age 70+                                            |         | 1003065    | 14108     | 7.5 (6.7, 8.4)          | 7.2 (6.3, 8.2)              | 1.2 (1.1, 1.4)                 | 204 (121, 320)               | 1024 (731, 1330)     | 836 (678, 1018)       | 203 (120, 319)      | 1021 (729, 1326)      | 833 (676, 1015)         | 1.4 (0.8, 2)                | 7.3 (5.5, 9.2)          | 5.9 (4.8, 7.1)    |
| Female                                             |         | 7604423    | 9296      | 7.7 (6, 9.3)            | 7.5 (5.7, 9.4)              | 1.4 (0.9, 1.8)                 | 156 (97, 251)                | 748 (536, 983)       | 662 (537, 801)        | 20 (13, 33)         | 98 (71, 129)          | 87 (71, 105)            | 1.7 (1, 2.3)                | 8 (6.4, 9.9)            | 7.1 (6.1, 8.1)    |
| Male                                               |         | 7435855    | 15153     | 7.5 (5.8, 9.1)          | 7.4 (5.6, 9.2)              | 1.3 (0.9, 1.8)                 | 287 (194, 415)               | 1365 (1069, 1694)    | 1204 (1026, 1386)     | 39 (26, 56)         | 184 (144, 228)        | 162 (138, 186)          | 1.9 (1.2, 2.7)              | 9 (7, 11.1)             | 7.9 (6.8, 9.1)    |
| All                                                |         | 15040278   | 24451     | 7.6 (6.4, 8.8)          | 7.5 (6.2, 8.8)              | 1.3 (1, 1.7)                   | 443 (322, 602)               | 2113 (1731, 2513)    | 1866 (1651, 2101)     | 29 (21, 40)         | 140 (115, 167)        | 124 (110, 140)          | 1.8 (1.3, 2.3)              | 8.6 (7.3, 10)           | 7.6 (6.8, 8.4)    |
| <b>Vietnam</b>                                     |         |            |           |                         |                             |                                |                              |                      |                       |                     |                       |                         |                             |                         |                   |
| Age 25-69                                          |         | 45546361   | 9105      | 14.1 (13.1, 15.1)       | 3 (2.8, 3.3)                | 1 (0.9, 1)                     | 824 (666, 995)               | 1788 (1462, 2127)    | 562 (461, 673)        | 18 (15, 22)         | 39 (32, 47)           | 12 (10, 15)             | 9.1 (7.9, 10.2)             | 19.6 (16.9, 22.1)       | 6.2 (5.5, 6.9)    |
| Age 70+                                            |         | 3652728    | 17835     | 14.1 (12.4, 15.8)       | 2.9 (2.5, 3.3)              | 0.9 (0.8, 1)                   | 1080 (778, 1414)             | 2300 (1710, 2949)    | 631 (490, 807)        | 296 (213, 387)      | 630 (468, 807)        | 173 (134, 221)          | 6.1 (4.6, 7.5)              | 12.9 (10.1, 15.6)       | 3.5 (2.8, 4.2)    |
| Female                                             |         | 25502306   | 11197     | 14.3 (11.2, 17.4)       | 3.1 (2.2, 3.9)              | 1 (0.6, 1.4)                   | 802 (578, 1081)              | 1596 (1172, 2111)    | 477 (370, 615)        | 31 (23, 42)         | 63 (46, 83)           | 19 (14, 24)             | 7.2 (5.9, 8.5)              | 14.3 (12, 16.4)         | 4.2 (3.6, 4.9)    |
| Male                                               |         | 23696783   | 15694     | 13.8 (10.8, 16.8)       | 3 (2.2, 3.9)                | 1 (0.6, 1.3)                   | 1102 (863, 1365)             | 2492 (1994, 3033)    | 716 (580, 861)        | 47 (36, 58)         | 105 (84, 128)         | 30 (24, 36)             | 7 (5.6, 8.3)                | 15.9 (13.3, 18.5)       | 4.5 (3.8, 5.3)    |
| All                                                |         | 49199089   | 26976     | 14.1 (11.9, 16.3)       | 3 (2.4, 3.6)                | 1 (0.7, 1.3)                   | 1904 (1572, 2260)            | 4088 (3443, 4779)    | 1192 (1014, 1393)     | 39 (32, 46)         | 83 (70, 97)           | 24 (21, 28)             | 7.1 (6, 8)                  | 15.2 (13.4, 17)         | 4.4 (4, 4.9)      |
| <b>Yemen</b>                                       |         |            |           |                         |                             |                                |                              |                      |                       |                     |                       |                         |                             |                         |                   |

|                 |         |       |                   |                |                |                 |                   |                  |                 |                   |                  |                 |                   |                  |
|-----------------|---------|-------|-------------------|----------------|----------------|-----------------|-------------------|------------------|-----------------|-------------------|------------------|-----------------|-------------------|------------------|
| Age 25-69       | 7738581 | 6927  | 14 (12.8, 15.2)   | 3.6 (3.3, 4)   | 1.5 (1.1, 1.8) | 620 (483, 764)  | 1296 (1042, 1554) | 790 (559, 1045)  | 80 (62, 99)     | 167 (135, 201)    | 102 (72, 135)    | 8.9 (7.5, 10.4) | 18.7 (16.2, 21.3) | 11.4 (8.2, 14.8) |
| Age 70+         | 348146  | 5054  | 13.9 (12, 15.8)   | 3.5 (3, 4.1)   | 1.3 (0.9, 1.9) | 308 (221, 410)  | 645 (478, 833)    | 358 (208, 539)   | 884 (635, 1177) | 1853 (1373, 2394) | 1027 (596, 1547) | 6.1 (4.6, 7.8)  | 12.8 (9.8, 15.7)  | 7.1 (4.1, 10.4)  |
| Female          | 4117963 | 5589  | 14.2 (11.1, 17.3) | 3.7 (2.7, 4.7) | 1.5 (1, 2)     | 446 (340, 562)  | 872 (673, 1082)   | 537 (342, 771)   | 108 (83, 136)   | 212 (163, 263)    | 130 (83, 187)    | 8 (6.3, 9.7)    | 15.6 (12.8, 18.4) | 9.6 (5.9, 13.8)  |
| Male            | 3968764 | 6382  | 13.7 (10.7, 16.7) | 3.6 (2.6, 4.5) | 1.4 (1, 1.9)   | 481 (362, 604)  | 1069 (816, 1311)  | 611 (409, 848)   | 121 (91, 152)   | 269 (206, 330)    | 154 (103, 214)   | 7.6 (5.9, 9.3)  | 16.8 (13.6, 20.1) | 9.6 (5.7, 13.6)  |
| All             | 8086727 | 12002 | 14 (11.8, 16.1)   | 3.6 (2.9, 4.3) | 1.5 (1.1, 1.8) | 927 (770, 1106) | 1941 (1634, 2268) | 1148 (854, 1446) | 115 (95, 137)   | 240 (202, 280)    | 142 (106, 179)   | 7.7 (6.5, 9)    | 16.2 (14.1, 18.2) | 9.5 (6.7, 12.1)  |
| <b>Zambia</b>   |         |       |                   |                |                |                 |                   |                  |                 |                   |                  |                 |                   |                  |
| Age 25-69       | 4178710 | 1825  | 10.4 (9.5, 11.2)  | 4.3 (3.9, 4.7) | 0.7 (0.5, 0.8) | 33 (24, 44)     | 303 (247, 364)    | 54 (35, 76)      | 8 (6, 11)       | 73 (59, 87)       | 13 (8, 18)       | 1.8 (1.3, 2.3)  | 16.6 (14.4, 18.9) | 2.9 (2, 3.9)     |
| Age 70+         | 231766  | 1840  | 10.3 (9, 11.7)    | 4.2 (3.5, 4.8) | 0.6 (0.4, 0.8) | 23 (14, 35)     | 217 (162, 275)    | 33 (18, 52)      | 101 (62, 150)   | 934 (697, 1187)   | 143 (78, 224)    | 1.3 (0.8, 1.8)  | 11.8 (9, 14.4)    | 1.8 (0.9, 2.8)   |
| Female          | 2209824 | 1746  | 10.5 (8.2, 12.8)  | 4.3 (3.2, 5.5) | 0.7 (0.3, 1)   | 28 (19, 40)     | 238 (186, 294)    | 41 (24, 61)      | 13 (9, 18)      | 108 (84, 133)     | 19 (11, 28)      | 1.6 (1.1, 2.2)  | 13.6 (11, 16.2)   | 2.4 (1.3, 3.4)   |
| Male            | 2200652 | 1923  | 10.2 (8, 12.5)    | 4.3 (3.2, 5.4) | 0.7 (0.3, 1)   | 28 (19, 39)     | 282 (223, 340)    | 46 (29, 65)      | 13 (9, 18)      | 128 (101, 155)    | 21 (13, 30)      | 1.5 (0.9, 2.1)  | 14.6 (11.8, 17.4) | 2.4 (1.4, 3.4)   |
| All             | 4410476 | 3665  | 10.4 (8.8, 12)    | 4.3 (3.5, 5.1) | 0.7 (0.4, 0.9) | 56 (43, 71)     | 520 (442, 607)    | 87 (62, 116)     | 13 (10, 16)     | 118 (100, 138)    | 20 (14, 26)      | 1.5 (1.1, 1.9)  | 14.2 (12.2, 16.2) | 2.4 (1.6, 3.1)   |
| <b>Zimbabwe</b> |         |       |                   |                |                |                 |                   |                  |                 |                   |                  |                 |                   |                  |
| Age 25-69       | 4246228 | 1463  | 9.4 (8.7, 10.1)   | 4.7 (4.3, 5.1) | 0.6 (0.5, 0.8) | 23 (17, 31)     | 232 (184, 287)    | 43 (25, 65)      | 5 (4, 7)        | 55 (43, 68)       | 10 (6, 15)       | 1.6 (1.2, 2)    | 15.9 (13.7, 18)   | 3 (1.7, 4.2)     |
| Age 70+         | 324479  | 2763  | 9.3 (8.2, 10.4)   | 4.5 (3.9, 5.1) | 0.6 (0.3, 0.9) | 28 (17, 43)     | 307 (220, 397)    | 48 (20, 89)      | 87 (52, 132)    | 945 (679, 1224)   | 147 (61, 274)    | 1 (0.6, 1.4)    | 11.1 (8.7, 13.6)  | 1.7 (0.6, 2.9)   |
| Female          | 2366465 | 2377  | 9.5 (7.4, 11.5)   | 4.7 (3.5, 6)   | 0.7 (0.3, 1)   | 28 (18, 43)     | 294 (218, 383)    | 51 (24, 91)      | 12 (8, 18)      | 124 (92, 162)     | 22 (10, 38)      | 1.2 (0.8, 1.6)  | 12.4 (10, 14.8)   | 2.2 (1, 3.4)     |
| Male            | 2204242 | 1850  | 9.2 (7.2, 11.2)   | 4.6 (3.4, 5.8) | 0.6 (0.3, 1)   | 23 (15, 32)     | 244 (185, 307)    | 40 (21, 66)      | 10 (7, 15)      | 111 (84, 139)     | 18 (9, 30)       | 1.2 (0.8, 1.7)  | 13.2 (10.7, 15.9) | 2.2 (0.8, 3.4)   |
| All             | 4570707 | 4223  | 9.4 (7.9, 10.8)   | 4.7 (3.8, 5.6) | 0.6 (0.4, 0.9) | 51 (38, 68)     | 539 (438, 643)    | 91 (58, 137)     | 11 (8, 15)      | 118 (96, 141)     | 20 (13, 30)      | 1.2 (0.9, 1.5)  | 12.8 (11, 14.6)   | 2.2 (1.2, 3)     |

\*Mean intake level (95%UI) was weighted based on the population in each country-, age- and sex-specific stratum in 2010

†Model decreases SFA to minimally 10% of energy but only if it can be isocalorically replaced with n-6 PUFA to maximally 12% of energy

‡Model increases n-6 PUFA to 12% of energy and replaces it isocalorically with either carbohydrates or SFA.

§ Model decreases TFA to 0.5% of energy and replaces it isocalorically with n-6 PUFA or monounsaturated fats or SFA

Abbreviation: CHD, Coronary Heart Disease; UI, Uncertainly Interval; E, energy; n-6 PUFA, omega-6 polyunsaturated fatty acid; SFA, saturated fatty acid; TFA, trans fatty acid.

Table S2: CHD Mortality Attributable to SFA, n-6PUFA and TFA in 1990 by country, age, and sex

|                            | Population | CHD Deaths | Mean Intake Level (95%UI)* |                 |                | Total CHD Deaths due to (95%UI) |                                      |                            | CHD Deaths/Million Population due to (95%UI) |                                      |                            | Proportion of CHD Deaths(%) due to (95%UI) |                                      |                            |
|----------------------------|------------|------------|----------------------------|-----------------|----------------|---------------------------------|--------------------------------------|----------------------------|----------------------------------------------|--------------------------------------|----------------------------|--------------------------------------------|--------------------------------------|----------------------------|
|                            |            |            | SFA(%E)                    | N-6 PUFA(%E)    | TFA(%E)        | Higher SFA (>10%E) Intake†      | Insufficient N-6 PUFA (<12%E)intake‡ | High TFA (>0.5%E) intake § | Higher SFA (>10%E) Intake†                   | Insufficient N-6 PUFA (<12%E)intake‡ | High TFA (>0.5%E) intake § | Higher SFA (>10%E) Intake†                 | Insufficient N-6 PUFA (<12%E)intake‡ | High TFA (>0.5%E) intake § |
| <b>Albania</b>             |            |            |                            |                 |                |                                 |                                      |                            |                                              |                                      |                            |                                            |                                      |                            |
| Age 25-69                  | 1463270    | 1048       | 12.4 (11.5, 13.4)          | 8.2 (7.4, 8.9)  | 1 (0.8, 1.1)   | 61 (45, 80)                     | 95 (73, 120)                         | 60 (43, 79)                | 52 (38, 69)                                  | 81 (61, 104)                         | 51 (36, 68)                | 5.8 (4.6, 7)                               | 9.1 (7.4, 10.7)                      | 5.7 (4.5, 7)               |
| Age 70+                    | 106600     | 1585       | 12.4 (10.9, 13.9)          | 7.9 (6.8, 9)    | 0.9 (0.7, 1.1) | 64 (41, 91)                     | 100 (71, 132)                        | 55 (35, 78)                | 592 (388, 841)                               | 939 (665, 1241)                      | 514 (330, 740)             | 4 (2.4, 5.6)                               | 6.3 (4.4, 8.2)                       | 3.5 (2.1, 4.9)             |
| Female                     | 773025     | 1146       | 12.6 (9.9, 15.3)           | 8.3 (6.4, 10.3) | 1 (0.6, 1.3)   | 54 (36, 78)                     | 77 (54, 104)                         | 46 (30, 65)                | 91 (60, 131)                                 | 128 (89, 177)                        | 77 (49, 110)               | 4.7 (3.4, 6.2)                             | 6.7 (4.9, 8.5)                       | 4 (2.8, 5.2)               |
| Male                       | 796845     | 1490       | 12.3 (9.6, 14.9)           | 8 (6.1, 9.9)    | 0.9 (0.6, 1.3) | 70 (51, 93)                     | 118 (92, 148)                        | 69 (47, 90)                | 128 (92, 173)                                | 218 (167, 277)                       | 125 (82, 167)              | 4.7 (3.4, 6.1)                             | 7.9 (6, 9.7)                         | 4.6 (3.2, 6)               |
| All                        | 1569870    | 2635       | 12.4 (10.5, 14.3)          | 8.2 (6.8, 9.5)  | 0.9 (0.7, 1.2) | 124 (97, 157)                   | 195 (160, 237)                       | 115 (88, 144)              | 109 (85, 140)                                | 172 (139, 211)                       | 100 (75, 127)              | 4.7 (3.7, 5.7)                             | 7.4 (6.1, 8.7)                       | 4.4 (3.4, 5.3)             |
| <b>Algeria</b>             |            |            |                            |                 |                |                                 |                                      |                            |                                              |                                      |                            |                                            |                                      |                            |
| Age 25-69                  | 8667168    | 6435       | 11.9 (11.6, 12.2)          | 3.8 (3.6, 4)    | 0.9 (0.9, 1)   | 285 (227, 347)                  | 1164 (946, 1381)                     | 344 (287, 411)             | 32 (25, 39)                                  | 128 (104, 152)                       | 38 (32, 45)                | 4.4 (3.7, 5.1)                             | 18.1 (16, 20.3)                      | 5.3 (4.6, 6)               |
| Age 70+                    | 563635     | 7549       | 11.9 (11.4, 12.4)          | 3.7 (3.4, 4)    | 0.8 (0.8, 0.9) | 231 (171, 306)                  | 929 (718, 1179)                      | 239 (189, 296)             | 401 (299, 526)                               | 1616 (1252, 2047)                    | 416 (331, 515)             | 3.1 (2.2, 3.9)                             | 12.3 (9.8, 14.9)                     | 3.2 (2.5, 3.9)             |
| Female                     | 4682482    | 6667       | 12.1 (9.5, 14.7)           | 3.9 (2.8, 4.9)  | 0.9 (0.5, 1.3) | 256 (197, 331)                  | 950 (753, 1185)                      | 272 (216, 333)             | 51 (40, 66)                                  | 190 (152, 235)                       | 55 (44, 67)                | 3.8 (3, 4.6)                               | 14.3 (11.5, 16.9)                    | 4.1 (3.4, 4.7)             |
| Male                       | 4548321    | 7348       | 11.8 (9.2, 14.3)           | 3.8 (2.8, 4.8)  | 0.9 (0.5, 1.3) | 260 (204, 324)                  | 1143 (913, 1373)                     | 311 (258, 371)             | 54 (42, 68)                                  | 236 (190, 284)                       | 65 (54, 77)                | 3.5 (2.7, 4.3)                             | 15.5 (12.7, 18.4)                    | 4.2 (3.5, 5)               |
| All                        | 9230803    | 14021      | 11.9 (10.1, 13.8)          | 3.8 (3.1, 4.5)  | 0.9 (0.6, 1.2) | 516 (434, 614)                  | 2093 (1784, 2444)                    | 583 (510, 665)             | 53 (45, 63)                                  | 213 (183, 249)                       | 60 (52, 68)                | 3.7 (3.1, 4.3)                             | 14.9 (13.2, 16.8)                    | 4.1 (3.6, 4.7)             |
| <b>Andorra</b>             |            |            |                            |                 |                |                                 |                                      |                            |                                              |                                      |                            |                                            |                                      |                            |
| Age 25-69                  | 29614      | 21         | 12 (11.1, 12.8)            | 5.4 (5.1, 5.8)  | 1.4 (1.2, 1.6) | 1 (1, 1)                        | 3 (2, 4)                             | 2 (1, 3)                   | 32 (23, 43)                                  | 106 (80, 135)                        | 75 (52, 104)               | 4.2 (3.4, 4.9)                             | 13.8 (12.2, 15.6)                    | 9.8 (8.1, 11.5)            |
| Age 70+                    | 5120       | 89         | 11.9 (10.5, 13.4)          | 5.2 (4.6, 5.8)  | 1.3 (1, 1.6)   | 3 (2, 4)                        | 9 (6, 11)                            | 5 (3, 8)                   | 562 (356, 827)                               | 1782 (1260, 2365)                    | 1104 (644, 1702)           | 3.1 (2.1, 4.1)                             | 9.8 (7.7, 11.9)                      | 6.1 (4.1, 8)               |
| Female                     | 18269      | 57         | 12.1 (9.4, 14.7)           | 5.5 (4.1, 6.8)  | 1.4 (1, 1.8)   | 2 (1, 3)                        | 6 (3, 8)                             | 4 (2, 6)                   | 125 (63, 205)                                | 369 (218, 552)                       | 234 (111, 396)             | 3.3 (2.7, 4.1)                             | 9.9 (8.4, 11.6)                      | 6.3 (5, 7.7)               |
| Male                       | 16465      | 54         | 11.8 (9.2, 14.3)           | 5.4 (4, 6.7)    | 1.4 (0.9, 1.8) | 2 (1, 2)                        | 6 (4, 8)                             | 4 (3, 5)                   | 131 (88, 187)                                | 452 (332, 586)                       | 291 (182, 417)             | 3.3 (2.5, 4)                               | 11.2 (9.4, 13)                       | 7.3 (5.5, 9.2)             |
| All                        | 34734      | 111        | 11.9 (10.1, 13.8)          | 5.4 (4.5, 6.4)  | 1.4 (1.1, 1.7) | 4 (3, 5)                        | 12 (9, 15)                           | 7 (5, 10)                  | 128 (91, 179)                                | 409 (317, 521)                       | 261 (172, 368)             | 3.3 (2.8, 3.9)                             | 10.5 (9.3, 11.7)                     | 6.8 (5.7, 7.8)             |
| <b>Angola</b>              |            |            |                            |                 |                |                                 |                                      |                            |                                              |                                      |                            |                                            |                                      |                            |
| Age 25-69                  | 3335486    | 2373       | 12.2 (11.2, 13.2)          | 5.5 (5.1, 6)    | 0.8 (0.7, 0.9) | 120 (85, 162)                   | 347 (259, 447)                       | 97 (62, 138)               | 34 (24, 46)                                  | 99 (74, 127)                         | 28 (18, 39)                | 5 (4, 6.1)                                 | 14.6 (12.7, 16.7)                    | 4.1 (2.9, 5.4)             |
| Age 70+                    | 145210     | 1391       | 12.1 (10.4, 13.8)          | 5.3 (4.5, 6.1)  | 0.7 (0.5, 0.9) | 50 (32, 74)                     | 145 (102, 198)                       | 36 (20, 58)                | 348 (227, 511)                               | 1018 (717, 1379)                     | 252 (138, 402)             | 3.6 (2.2, 4.7)                             | 10.4 (7.8, 13.1)                     | 2.6 (1.3, 3.8)             |
| Female                     | 1803073    | 1464       | 12.3 (9.7, 15)             | 5.6 (4.2, 6.9)  | 0.8 (0.4, 1.1) | 68 (47, 95)                     | 178 (132, 234)                       | 49 (28, 74)                | 36 (26, 51)                                  | 96 (72, 125)                         | 26 (15, 39)                | 4.6 (3.3, 5.8)                             | 12.2 (9.7, 14.5)                     | 3.4 (2, 4.7)               |
| Male                       | 1677623    | 2318       | 12 (9.4, 14.6)             | 5.5 (4.1, 6.9)  | 0.8 (0.4, 1.1) | 102 (67, 141)                   | 314 (222, 414)                       | 84 (51, 123)               | 59 (39, 81)                                  | 181 (130, 237)                       | 48 (29, 71)                | 4.4 (3.1, 5.8)                             | 13.6 (10.7, 16.3)                    | 3.6 (2.3, 4.9)             |
| All                        | 3480696    | 3778       | 12.2 (10.3, 14)            | 5.5 (4.5, 6.5)  | 0.8 (0.5, 1)   | 170 (130, 215)                  | 493 (391, 595)                       | 133 (93, 180)              | 48 (36, 60)                                  | 137 (110, 165)                       | 37 (26, 50)                | 4.5 (3.6, 5.4)                             | 13 (11.2, 14.8)                      | 3.5 (2.5, 4.5)             |
| <b>Antigua and Barbuda</b> |            |            |                            |                 |                |                                 |                                      |                            |                                              |                                      |                            |                                            |                                      |                            |
| Age 25-69                  | 27057      | 16         | 6.9 (6.4, 7.4)             | 4.1 (3.8, 4.5)  | 0.4 (0.3, 0.5) | 0 (0, 0)                        | 3 (2, 3)                             | 0 (0, 0)                   | 9 (7, 12)                                    | 110 (91, 130)                        | 5 (3, 8)                   | 1.4 (1.1, 1.7)                             | 16.8 (14.7, 18.8)                    | 0.7 (0.5, 1)               |
| Age 70+                    | 2612       | 34         | 6.9 (6, 7.8)               | 4 (3.5, 4.5)    | 0.4 (0.3, 0.5) | 0 (0, 0)                        | 4 (3, 5)                             | 0 (0, 0)                   | 125 (77, 191)                                | 1588 (1219, 2003)                    | 57 (22, 106)               | 0.9 (0.6, 1.3)                             | 11.7 (9.2, 14.1)                     | 0.4 (0.1, 0.7)             |
| Female                     | 15150      | 22         | 7 (5.4, 8.5)               | 4.2 (3.1, 5.3)  | 0.4 (0.1, 0.7) | 0 (0, 0)                        | 3 (2, 4)                             | 0 (0, 0)                   | 18 (11, 29)                                  | 221 (165, 284)                       | 9 (4, 16)                  | 1 (0.7, 1.4)                               | 12.8 (10.6, 15)                      | 0.5 (0.2, 0.7)             |
| Male                       | 14519      | 28         | 6.8 (5.3, 8.4)             | 4.1 (3, 5.1)    | 0.4 (0.1, 0.7) | 0 (0, 0)                        | 4 (3, 5)                             | 0 (0, 0)                   | 23 (16, 33)                                  | 291 (230, 352)                       | 11 (6, 20)                 | 1.1 (0.7, 1.4)                             | 13.8 (11.7, 16)                      | 0.5 (0.3, 0.8)             |
| All                        | 29669      | 50         | 6.9 (5.8, 8)               | 4.1 (3.4, 4.9)  | 0.4 (0.2, 0.6) | 1 (0, 1)                        | 7 (6, 8)                             | 0 (0, 0)                   | 21 (15, 27)                                  | 255 (213, 297)                       | 10 (6, 15)                 | 1.1 (0.8, 1.3)                             | 13.3 (11.8, 14.9)                    | 0.5 (0.3, 0.7)             |
| <b>Argentina</b>           |            |            |                            |                 |                |                                 |                                      |                            |                                              |                                      |                            |                                            |                                      |                            |
| Age 25-69                  | 15529216   | 15067      | 8.9 (8.3, 9.7)             | 6.5 (6, 6.9)    | 0.9 (0.9, 1)   | 295 (206, 420)                  | 1852 (1477, 2227)                    | 809 (696, 930)             | 18 (13, 26)                                  | 115 (93, 138)                        | 50 (43, 58)                | 2 (1.5, 2.4)                               | 12.3 (10.6, 14)                      | 5.4 (4.8, 5.9)             |
| Age 70+                    | 1831828    | 25577      | 8.9 (7.8, 10.1)            | 6.2 (5.5, 7.1)  | 0.9 (0.8, 0.9) | 326 (203, 496)                  | 2207 (1637, 2789)                    | 844 (688, 1015)            | 198 (119, 310)                               | 1344 (974, 1723)                     | 510 (412, 626)             | 1.3 (0.7, 1.8)                             | 8.6 (6.6, 10.6)                      | 3.3 (2.7, 3.9)             |
| Female                     | 9079224    | 17002      | 9 (7, 11)                  | 6.5 (5, 8.1)    | 0.9 (0.6, 1.3) | 241 (150, 386)                  | 1566 (1163, 2048)                    | 644 (525, 783)             | 33 (19, 59)                                  | 219 (153, 297)                       | 89 (69, 111)               | 1.4 (0.9, 1.9)                             | 9.2 (7.5, 10.9)                      | 3.8 (3.2, 4.3)             |
| Male                       | 8281820    | 23614      | 8.8 (6.9, 10.8)            | 6.4 (4.8, 7.9)  | 0.9 (0.5, 1.3) | 379 (265, 529)                  | 2493 (1995, 3000)                    | 1009 (863, 1161)           | 49 (34, 69)                                  | 321 (256, 392)                       | 128 (109, 149)             | 1.6 (1.1, 2.1)                             | 10.6 (8.6, 12.6)                     | 4.3 (3.7, 4.9)             |



|                   |          |       |                   |                |                |                   |                   |                   |                   |                   |                   |                  |                   |                   |
|-------------------|----------|-------|-------------------|----------------|----------------|-------------------|-------------------|-------------------|-------------------|-------------------|-------------------|------------------|-------------------|-------------------|
| All               | 17361044 | 40613 | 8.9 (7.5, 10.3)   | 6.5 (5.4, 7.6) | 0.9 (0.7, 1.2) | 621 (461, 827)    | 4059 (3405, 4713) | 1653 (1465, 1857) | 41 (29, 56)       | 268 (218, 318)    | 108 (94, 123)     | 1.5 (1.1, 1.9)   | 10 (8.7, 11.3)    | 4.1 (3.7, 4.5)    |
| <b>Armenia</b>    |          |       |                   |                |                |                   |                   |                   |                   |                   |                   |                  |                   |                   |
| Age 25-69         | 1787104  | 2668  | 13.9 (13, 14.9)   | 5.1 (4.7, 5.5) | 0.7 (0.6, 0.8) | 231 (184, 280)    | 409 (336, 482)    | 92 (63, 127)      | 131 (105, 158)    | 230 (192, 269)    | 52 (36, 70)       | 8.6 (7.4, 10)    | 15.3 (13.3, 17.2) | 3.5 (2.5, 4.4)    |
| Age 70+           | 119839   | 4596  | 14 (12.2, 15.8)   | 4.9 (4.3, 5.5) | 0.7 (0.5, 0.8) | 273 (189, 353)    | 472 (343, 591)    | 89 (47, 145)      | 2151 (1518, 2756) | 3734 (2764, 4660) | 706 (372, 1126)   | 5.9 (4.4, 7.5)   | 10.3 (7.9, 12.7)  | 1.9 (0.9, 2.8)    |
| Female            | 1018211  | 3397  | 14.1 (11, 17.1)   | 5.1 (3.8, 6.4) | 0.7 (0.4, 1.1) | 224 (155, 297)    | 379 (274, 485)    | 77 (40, 129)      | 374 (240, 519)    | 630 (432, 835)    | 126 (56, 223)     | 6.6 (5.3, 7.8)   | 11.2 (9.3, 12.9)  | 2.3 (1.5, 3)      |
| Male              | 888732   | 3863  | 13.9 (10.9, 16.9) | 5.1 (3.8, 6.3) | 0.7 (0.4, 1.1) | 280 (221, 346)    | 502 (406, 598)    | 104 (67, 144)     | 496 (369, 633)    | 892 (696, 1095)   | 177 (108, 258)    | 7.2 (5.8, 8.8)   | 13 (10.6, 15.4)   | 2.7 (1.7, 3.7)    |
| All               | 1906943  | 7259  | 13.9 (11.8, 16.1) | 5.1 (4.2, 6)   | 0.7 (0.5, 1)   | 504 (411, 602)    | 881 (739, 1024)   | 181 (126, 243)    | 426 (329, 518)    | 743 (599, 886)    | 148 (96, 212)     | 6.9 (6.1, 7.9)   | 12.1 (10.7, 13.6) | 2.5 (1.9, 3.1)    |
| <b>Australia</b>  |          |       |                   |                |                |                   |                   |                   |                   |                   |                   |                  |                   |                   |
| Age 25-69         | 9310507  | 9007  | 13.2 (13, 13.4)   | 5.2 (5.1, 5.3) | 1.3 (1.2, 1.3) | 581 (470, 694)    | 1285 (1039, 1527) | 786 (676, 911)    | 72 (59, 86)       | 160 (129, 189)    | 98 (84, 113)      | 6.4 (5.7, 7.2)   | 14.3 (12.6, 15.9) | 8.7 (7.9, 9.5)    |
| Age 70+           | 1230982  | 25492 | 13.2 (12.9, 13.5) | 5 (4.9, 5.2)   | 1.2 (1.1, 1.3) | 1246 (947, 1537)  | 2610 (2016, 3179) | 1434 (1209, 1676) | 1158 (855, 1457)  | 2423 (1822, 3015) | 1322 (1091, 1563) | 4.9 (3.9, 5.9)   | 10.2 (8.4, 12.3)  | 5.6 (4.8, 6.5)    |
| Female            | 5367817  | 15884 | 13.4 (10.5, 16.3) | 5.3 (3.9, 6.6) | 1.3 (0.9, 1.7) | 851 (608, 1092)   | 1676 (1208, 2126) | 962 (770, 1171)   | 205 (138, 269)    | 401 (273, 520)    | 228 (178, 283)    | 5.4 (4.5, 6.2)   | 10.6 (9, 12.1)    | 6.1 (5.4, 6.7)    |
| Male              | 5173672  | 18627 | 13 (10.2, 15.8)   | 5.1 (3.9, 6.4) | 1.3 (0.9, 1.7) | 976 (783, 1167)   | 2219 (1789, 2628) | 1258 (1082, 1443) | 255 (196, 310)    | 577 (447, 694)    | 323 (273, 376)    | 5.2 (4.3, 6.1)   | 11.9 (10, 13.6)   | 6.8 (6, 7.6)      |
| All               | 10541489 | 34494 | 13.2 (11.2, 15.2) | 5.2 (4.3, 6.1) | 1.3 (1, 1.6)   | 1827 (1505, 2140) | 3895 (3252, 4527) | 2220 (1967, 2474) | 229 (184, 273)    | 487 (394, 573)    | 275 (241, 311)    | 5.3 (4.7, 5.9)   | 11.3 (10.2, 12.5) | 6.4 (5.9, 7)      |
| <b>Austria</b>    |          |       |                   |                |                |                   |                   |                   |                   |                   |                   |                  |                   |                   |
| Age 25-69         | 4419857  | 5244  | 14.8 (14.5, 15.1) | 5.2 (4.8, 5.7) | 1.3 (1.2, 1.4) | 513 (409, 625)    | 746 (608, 890)    | 469 (401, 543)    | 127 (101, 155)    | 185 (151, 222)    | 116 (99, 135)     | 9.8 (8.5, 11.2)  | 14.2 (12.6, 15.9) | 9 (8.1, 9.8)      |
| Age 70+           | 755371   | 19041 | 14.8 (14.3, 15.3) | 5 (4.3, 5.7)   | 1.2 (1.1, 1.3) | 1344 (959, 1752)  | 1910 (1410, 2426) | 1039 (836, 1268)  | 1858 (1325, 2438) | 2651 (1952, 3397) | 1437 (1150, 1755) | 7.1 (5.4, 8.8)   | 10 (7.9, 12.1)    | 5.5 (4.6, 6.4)    |
| Female            | 2779276  | 13251 | 15 (11.8, 18.2)   | 5.2 (3.9, 6.5) | 1.3 (0.9, 1.7) | 995 (660, 1377)   | 1370 (930, 1834)  | 773 (598, 988)    | 403 (256, 566)    | 553 (364, 750)    | 310 (234, 403)    | 7.5 (6.2, 8.9)   | 10.3 (8.7, 11.9)  | 5.8 (5.1, 6.6)    |
| Male              | 2395952  | 11034 | 14.6 (11.5, 17.8) | 5.1 (3.9, 6.4) | 1.3 (0.9, 1.7) | 862 (665, 1073)   | 1286 (1010, 1570) | 735 (626, 854)    | 444 (336, 559)    | 662 (514, 815)    | 375 (316, 441)    | 7.8 (6.4, 9.2)   | 11.7 (9.8, 13.5)  | 6.7 (5.8, 7.5)    |
| All               | 5175228  | 24305 | 14.8 (12.6, 17.1) | 5.2 (4.3, 6.1) | 1.3 (1, 1.6)   | 1857 (1461, 2288) | 2656 (2132, 3190) | 1508 (1282, 1753) | 422 (331, 524)    | 605 (484, 732)    | 341 (289, 396)    | 7.6 (6.7, 8.6)   | 10.9 (9.8, 12.1)  | 6.2 (5.7, 6.7)    |
| <b>Azerbaijan</b> |          |       |                   |                |                |                   |                   |                   |                   |                   |                   |                  |                   |                   |
| Age 25-69         | 3169794  | 6348  | 15.2 (14.1, 16.4) | 5 (4.6, 5.4)   | 1 (0.9, 1.1)   | 732 (622, 852)    | 998 (861, 1155)   | 399 (340, 464)    | 227 (193, 264)    | 307 (261, 352)    | 124 (106, 143)    | 11.5 (9.9, 13.1) | 15.7 (13.7, 17.7) | 6.3 (5.5, 7.1)    |
| Age 70+           | 187204   | 6805  | 15.1 (13.2, 17)   | 4.8 (4.1, 5.5) | 0.9 (0.8, 1)   | 538 (413, 669)    | 731 (575, 901)    | 252 (202, 305)    | 3010 (2329, 3766) | 4109 (3237, 5073) | 1410 (1131, 1707) | 7.9 (5.9, 9.8)   | 10.7 (8.4, 13)    | 3.7 (2.9, 4.5)    |
| Female            | 1793456  | 6149  | 15.3 (12, 18.6)   | 5 (3.7, 6.3)   | 1 (0.6, 1.4)   | 567 (442, 698)    | 754 (597, 909)    | 282 (229, 338)    | 378 (289, 474)    | 500 (390, 617)    | 184 (148, 225)    | 9.2 (7.4, 11)    | 12.3 (10.2, 14.3) | 4.6 (3.8, 5.3)    |
| Male              | 1563542  | 7012  | 15.1 (11.9, 18.3) | 5 (3.7, 6.2)   | 1 (0.6, 1.4)   | 703 (578, 826)    | 975 (809, 1132)   | 369 (309, 433)    | 565 (461, 669)    | 781 (643, 912)    | 290 (242, 341)    | 10 (7.8, 11.9)   | 13.9 (11.4, 16.5) | 5.3 (4.4, 6.2)    |
| All               | 3356998  | 13156 | 15.2 (12.9, 17.5) | 5 (4.1, 5.9)   | 1 (0.7, 1.3)   | 1270 (1107, 1455) | 1729 (1524, 1967) | 651 (571, 735)    | 466 (401, 538)    | 633 (549, 722)    | 234 (204, 264)    | 9.7 (8.3, 11)    | 13.1 (11.5, 14.6) | 4.9 (4.4, 5.6)    |
| <b>Bahrain</b>    |          |       |                   |                |                |                   |                   |                   |                   |                   |                   |                  |                   |                   |
| Age 25-69         | 245192   | 260   | 9.2 (8.7, 9.8)    | 5.3 (4.8, 5.7) | 2.9 (2.7, 3.1) | 5 (4, 7)          | 43 (36, 50)       | 72 (64, 81)       | 22 (17, 30)       | 187 (157, 220)    | 315 (278, 356)    | 1.9 (1.4, 2.6)   | 16.5 (13.9, 19.1) | 27.8 (25, 30.6)   |
| Age 70+           | 6100     | 150   | 9.2 (8.4, 10.1)   | 5.1 (4.5, 5.7) | 2.6 (2.4, 2.9) | 2 (1, 3)          | 16 (12, 20)       | 24 (20, 28)       | 262 (164, 398)    | 2447 (1876, 3055) | 3786 (3115, 4511) | 1.1 (0.6, 1.6)   | 10.4 (7.9, 12.8)  | 15.9 (13.4, 18.5) |
| Female            | 92027    | 143   | 9.4 (7.3, 11.5)   | 5.4 (4, 6.7)   | 2.9 (2.3, 3.6) | 2 (2, 3)          | 18 (15, 22)       | 31 (26, 36)       | 23 (16, 31)       | 197 (159, 239)    | 333 (282, 389)    | 1.5 (0.9, 2)     | 12.8 (10.3, 15.2) | 21.4 (18.7, 24.2) |
| Male              | 159265   | 267   | 9.1 (7.1, 11.1)   | 5.2 (3.9, 6.5) | 2.8 (2.2, 3.5) | 5 (3, 6)          | 40 (33, 48)       | 65 (57, 74)       | 29 (21, 39)       | 247 (203, 293)    | 405 (351, 465)    | 1.7 (1, 2.4)     | 15.1 (12.1, 18.2) | 24.5 (21, 27.9)   |
| All               | 251292   | 410   | 9.2 (7.8, 10.7)   | 5.3 (4.3, 6.2) | 2.9 (2.4, 3.3) | 7 (5, 8)          | 59 (51, 67)       | 96 (86, 106)      | 27 (21, 34)       | 231 (197, 265)    | 381 (343, 424)    | 1.6 (1.2, 2.2)   | 14.3 (12.1, 16.4) | 23.4 (20.9, 25.6) |
| <b>Bangladesh</b> |          |       |                   |                |                |                   |                   |                   |                   |                   |                   |                  |                   |                   |
| Age 25-69         | 36517031 | 6606  | 1.9 (1.9, 2)      | 3.7 (3.3, 4)   | 1.8 (1.5, 2.2) | 90 (67, 119)      | 1205 (987, 1422)  | 1005 (769, 1237)  | 2 (2, 3)          | 30 (25, 35)       | 25 (20, 31)       | 1.4 (1, 1.7)     | 18.2 (16, 20.4)   | 15.2 (12.2, 18)   |
| Age 70+           | 2300312  | 7282  | 1.9 (1.9, 2)      | 3.6 (3.1, 4.1) | 1.7 (1.2, 2.2) | 64 (42, 94)       | 923 (715, 1157)   | 700 (466, 955)    | 28 (18, 41)       | 409 (315, 512)    | 310 (205, 423)    | 0.9 (0.5, 1.2)   | 12.7 (9.9, 15.3)  | 9.6 (6.2, 12.7)   |
| Female            | 18627931 | 5834  | 2 (1.4, 2.5)      | 3.7 (2.7, 4.7) | 1.9 (1.4, 2.4) | 63 (44, 89)       | 863 (682, 1055)   | 709 (520, 914)    | 3 (2, 5)          | 46 (37, 57)       | 38 (28, 49)       | 1.1 (0.7, 1.5)   | 14.8 (12.1, 17.3) | 12.2 (9, 15.4)    |
| Male              | 20189412 | 8092  | 1.9 (1.4, 2.4)    | 3.6 (2.7, 4.6) | 1.8 (1.3, 2.3) | 91 (64, 125)      | 1265 (1030, 1531) | 996 (727, 1273)   | 4 (3, 6)          | 58 (48, 70)       | 46 (33, 59)       | 1.1 (0.7, 1.6)   | 15.6 (13.1, 18.2) | 12.3 (9, 15.7)    |
| All               | 38817343 | 13894 | 1.9 (1.5, 2.3)    | 3.7 (3, 4.4)   | 1.8 (1.5, 2.2) | 154 (120, 195)    | 2128 (1814, 2437) | 1705 (1357, 2046) | 4 (3, 5)          | 52 (45, 60)       | 42 (34, 50)       | 1.1 (0.8, 1.4)   | 15.3 (13.5, 17.2) | 12.2 (9.9, 14.5)  |
| <b>Barbados</b>   |          |       |                   |                |                |                   |                   |                   |                   |                   |                   |                  |                   |                   |

|                |         |       |                   |                |                 |                   |                   |                   |                   |                   |                   |                  |                   |                   |
|----------------|---------|-------|-------------------|----------------|-----------------|-------------------|-------------------|-------------------|-------------------|-------------------|-------------------|------------------|-------------------|-------------------|
| Age 25-69      | 128595  | 77    | 7.5 (7.3, 7.7)    | 4.9 (4.8, 5.1) | 0.2 (0.2, 0.2)  | 1 (1, 1)          | 12 (10, 14)       | 0 (0, 0)          | 12 (9, 14)        | 119 (99, 139)     | 0 (0, 1)          | 1.5 (1.2, 1.7)   | 15 (13.3, 16.7)   | 0.1 (0, 0.1)      |
| Age 70+        | 18789   | 248   | 7.5 (7.3, 7.7)    | 4.8 (4.5, 5)   | 0.2 (0.2, 0.2)  | 2 (2, 3)          | 26 (20, 32)       | 0 (0, 0)          | 137 (97, 185)     | 1496 (1122, 1878) | 4 (3, 7)          | 1 (0.7, 1.2)     | 10.6 (8.4, 12.7)  | 0 (0, 0)          |
| Female         | 79274   | 175   | 7.6 (5.9, 9.3)    | 5 (3.7, 6.3)   | 0.2 (-0.1, 0.5) | 2 (1, 2)          | 19 (14, 25)       | 0 (0, 0)          | 25 (17, 35)       | 266 (188, 342)    | 1 (1, 1)          | 1 (0.8, 1.3)     | 11.1 (9.4, 12.8)  | 0 (0, 0.1)        |
| Male           | 68110   | 150   | 7.4 (5.7, 9.1)    | 4.9 (3.6, 6.1) | 0.2 (-0.1, 0.5) | 2 (1, 2)          | 18 (15, 22)       | 0 (0, 0)          | 28 (22, 35)       | 301 (247, 358)    | 1 (1, 1)          | 1.1 (0.9, 1.4)   | 12.3 (10.4, 14.2) | 0 (0, 0.1)        |
| All            | 147384  | 325   | 7.5 (6.3, 8.7)    | 4.9 (4, 5.8)   | 0.2 (0, 0.4)    | 4 (3, 4)          | 38 (31, 45)       | 0 (0, 0)          | 27 (21, 33)       | 283 (233, 334)    | 1 (1, 1)          | 1.1 (0.9, 1.3)   | 11.7 (10.5, 12.8) | 0 (0, 0)          |
| <b>Belarus</b> |         |       |                   |                |                 |                   |                   |                   |                   |                   |                   |                  |                   |                   |
| Age 25-69      | 5754839 | 12349 | 15.5 (14.3, 16.5) | 5.8 (5.4, 6.2) | 1.1 (0.9, 1.3)  | 1409 (1153, 1681) | 1680 (1380, 1984) | 893 (647, 1155)   | 234 (193, 276)    | 277 (230, 326)    | 148 (110, 190)    | 11.4 (9.9, 12.9) | 13.6 (11.9, 15.3) | 7.2 (5.7, 8.7)    |
| Age 70+        | 679860  | 32357 | 15.5 (13.4, 17.5) | 5.6 (4.8, 6.3) | 1 (0.8, 1.3)    | 2617 (1898, 3474) | 3021 (2217, 3954) | 1387 (763, 2048)  | 3608 (2637, 4785) | 4173 (3095, 5467) | 1923 (1098, 2818) | 8.1 (6, 10.3)    | 9.3 (7, 11.6)     | 4.3 (2.5, 6)      |
| Female         | 3555477 | 26500 | 15.6 (12.3, 19)   | 5.8 (4.4, 7.2) | 1.1 (0.7, 1.5)  | 2301 (1630, 3043) | 2595 (1860, 3409) | 1244 (694, 1914)  | 775 (535, 1047)   | 873 (608, 1165)   | 416 (219, 649)    | 8.7 (7.2, 10.1)  | 9.8 (8.1, 11.3)   | 4.7 (3.4, 6.1)    |
| Male           | 2879222 | 18222 | 15.2 (12, 18.5)   | 5.7 (4.3, 7.1) | 1.1 (0.7, 1.5)  | 1725 (1391, 2114) | 2106 (1704, 2551) | 1035 (729, 1367)  | 674 (545, 826)    | 822 (668, 998)    | 401 (282, 532)    | 9.5 (7.8, 11)    | 11.6 (9.4, 13.5)  | 5.7 (4.1, 7.2)    |
| All            | 6434699 | 44737 | 15.5 (13.1, 17.8) | 5.7 (4.7, 6.7) | 1.1 (0.8, 1.4)  | 4026 (3265, 4905) | 4701 (3856, 5683) | 2280 (1631, 2967) | 730 (583, 905)    | 850 (688, 1040)   | 409 (286, 541)    | 9 (7.9, 10.1)    | 10.5 (9.3, 11.8)  | 5.1 (4.1, 6)      |
| <b>Belgium</b> |         |       |                   |                |                 |                   |                   |                   |                   |                   |                   |                  |                   |                   |
| Age 25-69      | 5796499 | 5400  | 14.2 (13.9, 14.5) | 6.1 (5.9, 6.3) | 1.1 (1, 1.1)    | 465 (375, 558)    | 682 (549, 816)    | 350 (302, 408)    | 83 (67, 99)       | 121 (98, 145)     | 62 (54, 72)       | 8.6 (7.5, 9.8)   | 12.6 (11.2, 14.1) | 6.5 (5.9, 7)      |
| Age 70+        | 963413  | 16067 | 14.2 (13.6, 14.7) | 5.9 (5.6, 6.2) | 1 (0.9, 1)      | 994 (714, 1267)   | 1439 (1052, 1806) | 636 (519, 760)    | 1074 (765, 1366)  | 1558 (1124, 1953) | 686 (557, 821)    | 6.2 (4.8, 7.7)   | 9 (7.1, 10.9)     | 4 (3.3, 4.6)      |
| Female         | 3529354 | 10675 | 14.3 (11.2, 17.4) | 6.1 (4.6, 7.6) | 1.1 (0.7, 1.4)  | 710 (487, 950)    | 989 (676, 1301)   | 455 (358, 567)    | 240 (159, 327)    | 334 (222, 448)    | 152 (119, 193)    | 6.7 (5.6, 7.7)   | 9.3 (8, 10.6)     | 4.3 (3.8, 4.7)    |
| Male           | 3230558 | 10789 | 14.1 (11, 17.1)   | 6 (4.5, 7.5)   | 1 (0.7, 1.4)    | 750 (574, 910)    | 1132 (881, 1362)  | 531 (452, 613)    | 288 (214, 354)    | 435 (328, 531)    | 201 (169, 234)    | 6.9 (5.9, 8.1)   | 10.5 (8.8, 12.1)  | 4.9 (4.3, 5.5)    |
| All            | 6759912 | 21435 | 14.2 (12, 16.4)   | 6.1 (5, 7.1)   | 1.1 (0.8, 1.3)  | 1459 (1142, 1745) | 2121 (1689, 2508) | 986 (861, 1123)   | 263 (203, 318)    | 383 (299, 457)    | 176 (152, 201)    | 6.8 (6, 7.6)     | 9.9 (8.8, 11)     | 4.6 (4.2, 5)      |
| <b>Belize</b>  |         |       |                   |                |                 |                   |                   |                   |                   |                   |                   |                  |                   |                   |
| Age 25-69      | 61614   | 43    | 7 (6.4, 7.5)      | 3.6 (3.2, 3.9) | 0.5 (0.4, 0.6)  | 1 (0, 1)          | 8 (7, 9)          | 1 (0, 1)          | 8 (6, 11)         | 113 (96, 130)     | 8 (5, 11)         | 1.3 (1, 1.7)     | 18 (15.7, 20.3)   | 1.2 (0.8, 1.6)    |
| Age 70+        | 4868    | 89    | 7 (6.1, 7.8)      | 3.4 (3, 3.9)   | 0.4 (0.3, 0.5)  | 1 (0, 1)          | 11 (8, 14)        | 1 (0, 1)          | 157 (100, 237)    | 2368 (1791, 2932) | 135 (62, 238)     | 0.8 (0.5, 1.1)   | 12.5 (10, 14.9)   | 0.7 (0.3, 1.1)    |
| Female         | 33646   | 62    | 7.1 (5.5, 8.7)    | 3.6 (2.6, 4.6) | 0.5 (0.2, 0.8)  | 1 (0, 1)          | 8 (6, 11)         | 1 (0, 1)          | 16 (10, 24)       | 229 (175, 289)    | 15 (7, 26)        | 0.9 (0.6, 1.2)   | 13.7 (11.4, 16.1) | 0.9 (0.5, 1.3)    |
| Male           | 32836   | 70    | 6.8 (5.3, 8.4)    | 3.5 (2.6, 4.4) | 0.5 (0.2, 0.8)  | 1 (0, 1)          | 10 (8, 12)        | 1 (0, 1)          | 19 (14, 27)       | 281 (227, 334)    | 16 (9, 26)        | 1 (0.7, 1.4)     | 14.8 (12.2, 17.5) | 0.9 (0.4, 1.3)    |
| All            | 66482   | 132   | 7 (5.9, 8.1)      | 3.5 (2.9, 4.2) | 0.5 (0.2, 0.7)  | 1 (1, 2)          | 19 (16, 22)       | 1 (1, 2)          | 18 (13, 23)       | 255 (218, 296)    | 16 (10, 23)       | 1 (0.7, 1.2)     | 14.3 (12.6, 16.1) | 0.9 (0.6, 1.2)    |
| <b>Benin</b>   |         |       |                   |                |                 |                   |                   |                   |                   |                   |                   |                  |                   |                   |
| Age 25-69      | 1564657 | 594   | 11.7 (10.7, 12.8) | 3.5 (3.2, 3.8) | 0.8 (0.6, 0.9)  | 24 (19, 29)       | 111 (90, 131)     | 24 (17, 33)       | 14 (11, 18)       | 67 (54, 79)       | 15 (10, 20)       | 4 (3.2, 4.8)     | 18.7 (16.3, 21.1) | 4.1 (3.1, 5.3)    |
| Age 70+        | 97558   | 601   | 11.7 (10.2, 13.1) | 3.4 (2.9, 3.8) | 0.7 (0.5, 0.9)  | 17 (11, 24)       | 78 (58, 100)      | 15 (8, 23)        | 171 (117, 240)    | 792 (590, 1027)   | 150 (83, 231)     | 2.8 (1.9, 3.7)   | 12.9 (9.9, 15.9)  | 2.4 (1.2, 3.7)    |
| Female         | 913621  | 707   | 11.8 (9.2, 14.4)  | 3.5 (2.6, 4.5) | 0.8 (0.4, 1.1)  | 24 (18, 32)       | 108 (84, 132)     | 22 (14, 31)       | 24 (18, 31)       | 105 (83, 129)     | 22 (14, 31)       | 3.4 (2.6, 4.3)   | 15.2 (12.7, 17.7) | 3.1 (2, 4.3)      |
| Male           | 748594  | 487   | 11.5 (9, 14.1)    | 3.5 (2.5, 4.4) | 0.8 (0.4, 1.1)  | 16 (12, 20)       | 81 (63, 97)       | 17 (11, 24)       | 19 (14, 25)       | 96 (75, 116)      | 20 (13, 29)       | 3.3 (2.4, 4.2)   | 16.6 (13.5, 19.5) | 3.4 (2, 4.9)      |
| All            | 1662215 | 1197  | 11.7 (9.9, 13.5)  | 3.5 (2.8, 4.2) | 0.8 (0.5, 1)    | 41 (33, 49)       | 188 (160, 217)    | 39 (29, 50)       | 22 (18, 26)       | 101 (86, 117)     | 21 (16, 27)       | 3.4 (2.7, 4.1)   | 15.7 (13.8, 17.8) | 3.3 (2.3, 4.2)    |
| <b>Bhutan</b>  |         |       |                   |                |                 |                   |                   |                   |                   |                   |                   |                  |                   |                   |
| Age 25-69      | 208792  | 95    | 3 (2.8, 3.2)      | 3.6 (3.3, 3.8) | 2 (1.7, 2.3)    | 1 (1, 2)          | 17 (13, 23)       | 16 (11, 21)       | 6 (4, 8)          | 76 (56, 100)      | 68 (48, 91)       | 1.3 (1, 1.7)     | 18.4 (15.9, 20.9) | 16.5 (13.6, 19.5) |
| Age 70+        | 9711    | 66    | 3 (2.6, 3.4)      | 3.5 (2.9, 3.9) | 1.8 (1.3, 2.3)  | 1 (0, 1)          | 9 (6, 12)         | 7 (4, 11)         | 63 (37, 99)       | 927 (623, 1280)   | 759 (480, 1124)   | 0.9 (0.5, 1.2)   | 12.9 (10.2, 15.6) | 10.6 (7.4, 13.8)  |
| Female         | 104187  | 71    | 3 (2.3, 3.8)      | 3.6 (2.6, 4.6) | 2 (1.5, 2.5)    | 1 (1, 1)          | 11 (8, 15)        | 10 (7, 14)        | 9 (6, 13)         | 125 (86, 166)     | 110 (73, 155)     | 1.1 (0.7, 1.5)   | 15.7 (13.1, 18.5) | 14 (10.5, 17.5)   |
| Male           | 114316  | 89    | 3 (2.2, 3.7)      | 3.5 (2.6, 4.5) | 1.9 (1.4, 2.4)  | 1 (1, 2)          | 15 (10, 20)       | 13 (8, 18)        | 9 (6, 13)         | 130 (90, 174)     | 110 (73, 153)     | 1.2 (0.8, 1.6)   | 16.6 (13.4, 19.5) | 14.2 (10.5, 18.3) |
| All            | 218503  | 161   | 3 (2.5, 3.6)      | 3.6 (2.9, 4.2) | 2 (1.6, 2.3)    | 2 (1, 2)          | 26 (20, 32)       | 23 (17, 28)       | 9 (6, 12)         | 128 (98, 158)     | 110 (86, 139)     | 1.1 (0.9, 1.4)   | 16.1 (14, 18.1)   | 14.1 (11.5, 16.8) |
| <b>Bolivia</b> |         |       |                   |                |                 |                   |                   |                   |                   |                   |                   |                  |                   |                   |
| Age 25-69      | 2475093 | 1602  | 4.1 (3.7, 4.4)    | 5.4 (5, 5.8)   | 0.8 (0.8, 0.9)  | 29 (21, 39)       | 241 (197, 287)    | 72 (59, 86)       | 12 (9, 16)        | 98 (80, 118)      | 29 (24, 35)       | 1.8 (1.3, 2.3)   | 15 (13.1, 17.1)   | 4.5 (3.9, 5)      |
| Age 70+        | 143724  | 1664  | 4 (3.4, 4.6)      | 5.2 (4.5, 5.9) | 0.8 (0.7, 0.8)  | 19 (12, 29)       | 171 (128, 220)    | 44 (33, 56)       | 136 (84, 208)     | 1230 (914, 1579)  | 316 (234, 403)    | 1.1 (0.6, 1.7)   | 10.3 (7.9, 12.7)  | 2.6 (2, 3.2)      |

|                               |          |        |                   |                   |                |                   |                      |                      |                 |                   |                   |                |                   |                   |
|-------------------------------|----------|--------|-------------------|-------------------|----------------|-------------------|----------------------|----------------------|-----------------|-------------------|-------------------|----------------|-------------------|-------------------|
| Female                        | 1354096  | 1711   | 4.1 (3.1, 5.1)    | 5.4 (4.1, 6.8)    | 0.8 (0.5, 1.2) | 25 (16, 36)       | 209 (163, 262)       | 60 (47, 75)          | 21 (13, 30)     | 174 (135, 221)    | 49 (39, 62)       | 1.4 (1, 2)     | 12.2 (9.8, 14.6)  | 3.5 (2.9, 4.1)    |
| Male                          | 1264721  | 1547   | 4 (3, 4.9)        | 5.3 (4, 6.6)      | 0.8 (0.5, 1.2) | 23 (16, 32)       | 203 (161, 247)       | 56 (45, 69)          | 19 (13, 27)     | 170 (133, 208)    | 46 (37, 58)       | 1.5 (0.9, 2.1) | 13.1 (10.6, 15.8) | 3.6 (3, 4.2)      |
| All                           | 2618817  | 3270   | 4.1 (3.4, 4.8)    | 5.3 (4.4, 6.3)    | 0.8 (0.6, 1.1) | 48 (36, 62)       | 412 (347, 484)       | 116 (99, 135)        | 20 (15, 26)     | 172 (145, 204)    | 48 (41, 56)       | 1.5 (1.1, 1.9) | 12.6 (11, 14.1)   | 3.5 (3.1, 4)      |
| <b>Bosnia and Herzegovina</b> |          |        |                   |                   |                |                   |                      |                      |                 |                   |                   |                |                   |                   |
| Age 25-69                     | 2373215  | 3025   | 8.9 (8.3, 9.6)    | 5.6 (5, 6)        | 0.9 (0.9, 1)   | 55 (38, 77)       | 428 (352, 506)       | 156 (132, 182)       | 27 (19, 38)     | 210 (172, 249)    | 76 (64, 89)       | 1.8 (1.3, 2.3) | 14.2 (12.4, 15.9) | 5.2 (4.5, 5.8)    |
| Age 70+                       | 144798   | 3382   | 8.9 (7.7, 10.1)   | 5.3 (4.5, 6.1)    | 0.8 (0.8, 0.9) | 39 (24, 64)       | 330 (257, 411)       | 106 (84, 131)        | 269 (160, 434)  | 2246 (1749, 2801) | 721 (569, 892)    | 1.2 (0.6, 1.8) | 9.8 (7.3, 12.2)   | 3.1 (2.4, 3.9)    |
| Female                        | 1302013  | 3016   | 9 (7, 11)         | 5.6 (4.2, 7)      | 0.9 (0.5, 1.3) | 42 (26, 68)       | 330 (257, 408)       | 116 (94, 140)        | 55 (32, 93)     | 442 (325, 575)    | 151 (117, 187)    | 1.4 (0.9, 1.9) | 11 (9.1, 12.9)    | 3.9 (3.3, 4.5)    |
| Male                          | 1216000  | 3394   | 8.8 (6.9, 10.8)   | 5.5 (4.1, 6.8)    | 0.9 (0.5, 1.3) | 52 (35, 74)       | 428 (351, 513)       | 146 (121, 172)       | 68 (43, 100)    | 566 (456, 686)    | 187 (151, 224)    | 1.5 (1, 2.1)   | 12.6 (10.5, 14.7) | 4.3 (3.7, 4.9)    |
| All                           | 2518013  | 6399   | 8.9 (7.5, 10.3)   | 5.6 (4.6, 6.5)    | 0.9 (0.6, 1.2) | 94 (69, 125)      | 759 (650, 871)       | 262 (229, 299)       | 61 (43, 87)     | 500 (419, 586)    | 168 (144, 195)    | 1.5 (1.1, 1.8) | 11.9 (10.5, 13.4) | 4.1 (3.7, 4.5)    |
| <b>Botswana</b>               |          |        |                   |                   |                |                   |                      |                      |                 |                   |                   |                |                   |                   |
| Age 25-69                     | 471101   | 131    | 9.2 (8.4, 9.9)    | 3.7 (3.4, 4)      | 0.9 (0.7, 1)   | 2 (1, 2)          | 23 (18, 29)          | 6 (4, 9)             | 4 (3, 6)        | 55 (43, 68)       | 15 (10, 20)       | 1.3 (0.9, 1.7) | 17.8 (15.4, 20.1) | 4.7 (3.3, 6.2)    |
| Age 70+                       | 19470    | 131    | 9.1 (7.9, 10.3)   | 3.6 (3.1, 4)      | 0.8 (0.5, 1)   | 1 (1, 2)          | 16 (12, 22)          | 4 (2, 6)             | 58 (37, 87)     | 841 (624, 1094)   | 193 (103, 300)    | 0.9 (0.5, 1.2) | 12.6 (9.8, 15.3)  | 2.9 (1.4, 4.4)    |
| Female                        | 255733   | 138    | 9.3 (7.2, 11.3)   | 3.7 (2.7, 4.7)    | 0.9 (0.5, 1.2) | 1 (1, 2)          | 20 (15, 25)          | 5 (3, 8)             | 7 (5, 10)       | 94 (72, 121)      | 24 (15, 35)       | 1 (0.7, 1.4)   | 14.6 (11.8, 17.3) | 3.7 (2.3, 5.1)    |
| Male                          | 234838   | 123    | 9 (7, 11)         | 3.6 (2.7, 4.6)    | 0.8 (0.5, 1.2) | 1 (1, 2)          | 20 (15, 24)          | 5 (3, 7)             | 7 (5, 10)       | 97 (75, 121)      | 23 (14, 34)       | 1.1 (0.7, 1.6) | 15.9 (12.9, 19)   | 3.9 (2.2, 5.4)    |
| All                           | 490571   | 262    | 9.1 (7.7, 10.6)   | 3.7 (3, 4.4)      | 0.9 (0.6, 1.1) | 3 (2, 4)          | 40 (33, 47)          | 10 (7, 13)           | 7 (5, 9)        | 96 (80, 114)      | 24 (17, 31)       | 1.1 (0.8, 1.4) | 15.2 (13.2, 17.1) | 3.8 (2.7, 4.9)    |
| <b>Brazil</b>                 |          |        |                   |                   |                |                   |                      |                      |                 |                   |                   |                |                   |                   |
| Age 25-69                     | 64148803 | 53449  | 8.2 (8.1, 8.4)    | 6.3 (6.2, 6.4)    | 1.8 (1.8, 1.9) | 985 (828, 1143)   | 6954 (5906, 7935)    | 8235 (7446, 9077)    | 17 (14, 20)     | 122 (103, 139)    | 144 (130, 159)    | 1.8 (1.6, 2.1) | 13 (11.5, 14.6)   | 15.4 (14.1, 16.6) |
| Age 70+                       | 4015401  | 54869  | 8.2 (8, 8.4)      | 6.1 (6, 6.2)      | 1.7 (1.6, 1.8) | 636 (487, 783)    | 4903 (3827, 5920)    | 5244 (4550, 6077)    | 171 (130, 212)  | 1319 (1020, 1610) | 1406 (1203, 1635) | 1.2 (0.9, 1.4) | 8.9 (7.1, 10.9)   | 9.6 (8.3, 10.9)   |
| Female                        | 34905378 | 46015  | 8.4 (6.5, 10.2)   | 6.4 (4.8, 7.9)    | 1.9 (1.4, 2.4) | 651 (526, 777)    | 4729 (3863, 5550)    | 5492 (4816, 6165)    | 24 (19, 30)     | 179 (143, 217)    | 206 (178, 235)    | 1.4 (1.1, 1.7) | 10.3 (8.5, 12)    | 11.9 (10.7, 13.2) |
| Male                          | 33258826 | 62243  | 8.1 (6.3, 9.9)    | 6.2 (4.7, 7.8)    | 1.8 (1.3, 2.3) | 970 (798, 1154)   | 7128 (5920, 8367)    | 7988 (7119, 8938)    | 35 (28, 42)     | 259 (213, 303)    | 288 (256, 322)    | 1.6 (1.3, 1.9) | 11.5 (9.6, 13.3)  | 12.8 (11.4, 14.3) |
| All                           | 68164204 | 108367 | 8.2 (6.9, 9.5)    | 6.3 (5.2, 7.4)    | 1.8 (1.5, 2.2) | 1621 (1408, 1822) | 11857 (10353, 13181) | 13479 (12402, 14615) | 30 (25, 33)     | 218 (188, 244)    | 245 (225, 268)    | 1.5 (1.3, 1.7) | 10.9 (9.7, 12.3)  | 12.4 (11.5, 13.4) |
| <b>Brunei</b>                 |          |        |                   |                   |                |                   |                      |                      |                 |                   |                   |                |                   |                   |
| Age 25-69                     | 115548   | 58     | 12.1 (11, 13.1)   | 3.1 (2.8, 3.4)    | 1.2 (1, 1.4)   | 3 (2, 3)          | 12 (10, 14)          | 5 (4, 7)             | 29 (23, 34)     | 117 (98, 137)     | 51 (39, 65)       | 5 (4.1, 5.8)   | 20.4 (17.7, 23.2) | 8.9 (7, 11)       |
| Age 70+                       | 4385     | 65     | 12 (10.5, 13.5)   | 3 (2.6, 3.4)      | 1.1 (0.8, 1.4) | 2 (1, 3)          | 8 (6, 11)            | 3 (2, 4)             | 469 (328, 621)  | 1905 (1439, 2402) | 718 (438, 1011)   | 3.2 (2.3, 4.1) | 12.9 (10.4, 15.6) | 4.9 (3.1, 6.6)    |
| Female                        | 54813    | 45     | 12.3 (9.6, 14.9)  | 3.2 (2.3, 4.1)    | 1.2 (0.8, 1.6) | 2 (1, 2)          | 7 (5, 8)             | 3 (2, 4)             | 35 (27, 46)     | 133 (104, 162)    | 55 (36, 74)       | 4 (3.1, 5)     | 15.1 (12.4, 17.9) | 6.2 (4.2, 8.3)    |
| Male                          | 65120    | 78     | 11.9 (9.3, 14.5)  | 3.1 (2.2, 3.9)    | 1.2 (0.8, 1.6) | 3 (2, 4)          | 14 (11, 16)          | 6 (4, 7)             | 57 (45, 71)     | 247 (206, 290)    | 102 (74, 132)     | 4 (3.1, 4.9)   | 17.3 (14.6, 20.1) | 7.1 (5.1, 9.1)    |
| All                           | 119933   | 123    | 12.1 (10.2, 14)   | 3.1 (2.5, 3.7)    | 1.2 (0.9, 1.5) | 5 (4, 6)          | 20 (18, 23)          | 8 (7, 10)            | 46 (38, 55)     | 190 (164, 215)    | 78 (61, 95)       | 4 (3.4, 4.8)   | 16.5 (14.4, 18.5) | 6.8 (5.4, 8.3)    |
| <b>Bulgaria</b>               |          |        |                   |                   |                |                   |                      |                      |                 |                   |                   |                |                   |                   |
| Age 25-69                     | 5123276  | 10042  | 14.4 (14, 14.9)   | 11.9 (11.4, 12.3) | 0.9 (0.9, 0.9) | 329 (249, 418)    | 329 (248, 417)       | 494 (423, 573)       | 63 (48, 78)     | 63 (48, 78)       | 95 (81, 109)      | 3.3 (2.7, 3.8) | 3.3 (2.7, 3.8)    | 4.9 (4.4, 5.4)    |
| Age 70+                       | 674905   | 22250  | 14.4 (13.7, 15.1) | 11.4 (10.8, 12.1) | 0.8 (0.8, 0.9) | 535 (383, 729)    | 535 (383, 729)       | 669 (540, 800)       | 811 (575, 1111) | 811 (575, 1111)   | 1015 (813, 1224)  | 2.4 (1.7, 3.1) | 2.4 (1.7, 3.1)    | 3 (2.5, 3.6)      |
| Female                        | 2997466  | 14971  | 14.6 (11.5, 17.7) | 11.9 (9.3, 14.6)  | 0.9 (0.5, 1.3) | 363 (251, 502)    | 362 (250, 501)       | 509 (413, 628)       | 168 (112, 242)  | 168 (112, 241)    | 231 (181, 290)    | 2.4 (1.9, 3)   | 2.4 (1.9, 2.9)    | 3.4 (3, 3.8)      |
| Male                          | 2800715  | 17314  | 14.3 (11.2, 17.4) | 11.6 (9, 14.3)    | 0.9 (0.5, 1.2) | 502 (374, 643)    | 502 (374, 643)       | 654 (560, 762)       | 208 (152, 276)  | 208 (152, 276)    | 266 (225, 313)    | 2.9 (2.3, 3.6) | 2.9 (2.2, 3.5)    | 3.8 (3.2, 4.3)    |
| All                           | 5798181  | 32291  | 14.4 (12.2, 16.6) | 11.8 (9.9, 13.7)  | 0.9 (0.6, 1.2) | 865 (690, 1074)   | 864 (690, 1073)      | 1164 (1024, 1310)    | 187 (146, 240)  | 187 (146, 240)    | 248 (215, 285)    | 2.7 (2.3, 3.1) | 2.7 (2.3, 3.1)    | 3.6 (3.3, 4)      |
| <b>Burkina Faso</b>           |          |        |                   |                   |                |                   |                      |                      |                 |                   |                   |                |                   |                   |
| Age 25-69                     | 2895150  | 726    | 7.3 (6.7, 8)      | 3.7 (3.3, 4)      | 0.7 (0.6, 0.9) | 10 (7, 14)        | 134 (106, 164)       | 28 (18, 38)          | 3 (2, 4)        | 41 (33, 49)       | 8 (6, 11)         | 1.4 (1, 1.8)   | 18.4 (16, 20.9)   | 3.8 (2.6, 5)      |
| Age 70+                       | 126754   | 403    | 7.3 (6.1, 8.5)    | 3.5 (3, 4.1)      | 0.7 (0.4, 0.9) | 4 (2, 6)          | 53 (34, 76)          | 9 (4, 16)            | 30 (16, 51)     | 427 (276, 620)    | 77 (34, 133)      | 0.9 (0.5, 1.4) | 13.1 (10, 16.4)   | 2.3 (1.1, 3.7)    |
| Female                        | 1648020  | 641    | 7.4 (5.7, 9)      | 3.7 (2.7, 4.7)    | 0.7 (0.4, 1.1) | 8 (5, 11)         | 103 (74, 135)        | 21 (13, 31)          | 4 (3, 6)        | 57 (42, 73)       | 11 (7, 17)        | 1.2 (0.8, 1.6) | 16 (13.1, 19.1)   | 3.2 (1.8, 4.6)    |
| Male                          | 1373884  | 489    | 7.2 (5.6, 8.9)    | 3.6 (2.6, 4.6)    | 0.7 (0.4, 1.1) | 6 (4, 9)          | 84 (67, 102)         | 17 (10, 24)          | 4 (3, 5)        | 51 (41, 62)       | 10 (6, 15)        | 1.3 (0.8, 1.8) | 17.2 (14.2, 20.4) | 3.4 (1.7, 5)      |

|                                 |          |       |                   |                |                |                  |                   |                      |                 |                   |                   |                |                   |                   |
|---------------------------------|----------|-------|-------------------|----------------|----------------|------------------|-------------------|----------------------|-----------------|-------------------|-------------------|----------------|-------------------|-------------------|
| All                             | 3021904  | 1136  | 7.3 (6.2, 8.5)    | 3.6 (3, 4.3)   | 0.7 (0.5, 1)   | 14 (10, 18)      | 187 (153, 225)    | 37 (27, 49)          | 4 (3, 5)        | 54 (44, 65)       | 11 (8, 14)        | 1.2 (0.9, 1.6) | 16.4 (14.4, 18.5) | 3.3 (2.2, 4.3)    |
| <b>Burundi</b>                  |          |       |                   |                |                |                  |                   |                      |                 |                   |                   |                |                   |                   |
| Age 25-69                       | 1933077  | 1210  | 8.8 (8.1, 9.5)    | 3.8 (3.2, 4.3) | 0.6 (0.5, 0.7) | 19 (12, 28)      | 223 (169, 281)    | 30 (19, 43)          | 10 (6, 15)      | 117 (88, 147)     | 15 (10, 23)       | 1.6 (1, 2.1)   | 18.5 (16, 20.9)   | 2.4 (1.6, 3.3)    |
| Age 70+                         | 104623   | 935   | 8.8 (7.6, 9.9)    | 3.7 (2.8, 4.5) | 0.5 (0.4, 0.7) | 9 (5, 17)        | 118 (83, 157)     | 13 (6, 22)           | 91 (49, 161)    | 1143 (800, 1512)  | 128 (57, 217)     | 1 (0.4, 1.6)   | 12.6 (9.5, 15.7)  | 1.4 (0.6, 2.3)    |
| Female                          | 1089324  | 1098  | 8.9 (6.9, 10.8)   | 3.8 (2.8, 4.8) | 0.6 (0.3, 0.9) | 14 (8, 23)       | 164 (117, 215)    | 21 (11, 33)          | 12 (7, 19)      | 142 (101, 182)    | 18 (10, 28)       | 1.3 (0.6, 1.9) | 14.9 (12.2, 17.7) | 1.9 (1, 2.9)      |
| Male                            | 948376   | 1069  | 8.7 (6.7, 10.6)   | 3.7 (2.7, 4.7) | 0.6 (0.3, 0.9) | 15 (9, 22)       | 177 (131, 229)    | 22 (13, 33)          | 15 (9, 23)      | 180 (132, 234)    | 23 (13, 34)       | 1.4 (0.6, 2.1) | 16.6 (13.2, 19.9) | 2.1 (1, 3.1)      |
| All                             | 2037700  | 2146  | 8.8 (7.4, 10.1)   | 3.8 (3.1, 4.5) | 0.6 (0.4, 0.8) | 28 (20, 39)      | 341 (274, 414)    | 43 (29, 59)          | 13 (9, 18)      | 160 (127, 194)    | 20 (14, 28)       | 1.3 (0.8, 1.8) | 15.9 (13.8, 18.1) | 2 (1.3, 2.7)      |
| <b>Cambodia</b>                 |          |       |                   |                |                |                  |                   |                      |                 |                   |                   |                |                   |                   |
| Age 25-69                       | 3422002  | 3236  | 13.6 (12.4, 14.7) | 2.7 (2.5, 2.9) | 0.7 (0.6, 0.9) | 265 (215, 319)   | 662 (547, 779)    | 123 (87, 167)        | 89 (72, 108)    | 226 (186, 266)    | 42 (29, 57)       | 8.2 (6.9, 9.4) | 20.5 (18, 22.8)   | 3.8 (2.8, 4.9)    |
| Age 70+                         | 153871   | 2368  | 13.4 (11.5, 15.3) | 2.6 (2.3, 2.9) | 0.7 (0.5, 0.9) | 132 (99, 170)    | 337 (257, 421)    | 54 (31, 82)          | 910 (677, 1162) | 2281 (1718, 2848) | 364 (202, 567)    | 5.6 (4.1, 6.9) | 14.2 (11, 17.4)   | 2.3 (1.2, 3.4)    |
| Female                          | 2022469  | 2929  | 13.8 (10.8, 16.7) | 2.7 (1.9, 3.5) | 0.8 (0.4, 1.1) | 211 (164, 261)   | 506 (397, 619)    | 92 (58, 132)         | 126 (97, 157)   | 302 (234, 368)    | 54 (34, 78)       | 7.2 (5.9, 8.6) | 17.3 (14.4, 20.1) | 3.1 (1.9, 4.5)    |
| Male                            | 1553404  | 2688  | 13.4 (10.5, 16.3) | 2.7 (1.9, 3.4) | 0.7 (0.4, 1.1) | 186 (149, 226)   | 493 (403, 590)    | 86 (58, 121)         | 127 (101, 157)  | 338 (274, 407)    | 59 (39, 84)       | 6.9 (5.4, 8.3) | 18.4 (15.3, 21.4) | 3.2 (1.9, 4.5)    |
| All                             | 3575873  | 5609  | 13.6 (11.5, 15.7) | 2.7 (2.1, 3.2) | 0.7 (0.5, 1)   | 397 (337, 459)   | 999 (855, 1138)   | 177 (132, 228)       | 127 (106, 146)  | 319 (271, 366)    | 56 (41, 73)       | 7.1 (6.1, 8)   | 17.8 (15.6, 19.9) | 3.2 (2.2, 4.1)    |
| <b>Cameroon</b>                 |          |       |                   |                |                |                  |                   |                      |                 |                   |                   |                |                   |                   |
| Age 25-69                       | 4128491  | 1962  | 12.3 (11.4, 13.3) | 3.4 (3.1, 3.6) | 0.9 (0.8, 0.9) | 104 (84, 128)    | 374 (309, 442)    | 100 (81, 117)        | 23 (19, 29)     | 84 (69, 99)       | 23 (18, 26)       | 5.3 (4.4, 6.2) | 19 (16.5, 21.6)   | 5.1 (4.4, 5.9)    |
| Age 70+                         | 251930   | 1701  | 12.2 (10.6, 13.8) | 3.2 (2.9, 3.7) | 0.8 (0.7, 0.9) | 62 (43, 83)      | 223 (163, 285)    | 52 (39, 67)          | 247 (170, 335)  | 890 (653, 1142)   | 207 (154, 270)    | 3.6 (2.6, 4.5) | 13.1 (10, 16.1)   | 3 (2.3, 3.8)      |
| Female                          | 2247965  | 1987  | 12.4 (9.7, 15.1)  | 3.4 (2.5, 4.3) | 0.9 (0.5, 1.3) | 90 (68, 115)     | 311 (245, 382)    | 80 (63, 99)          | 38 (28, 48)     | 129 (102, 158)    | 33 (26, 41)       | 4.5 (3.5, 5.6) | 15.6 (12.9, 18.2) | 4 (3.3, 4.9)      |
| Male                            | 2132456  | 1674  | 12.2 (9.5, 14.8)  | 3.3 (2.4, 4.2) | 0.9 (0.5, 1.2) | 76 (58, 96)      | 285 (228, 349)    | 72 (57, 88)          | 33 (25, 42)     | 124 (100, 151)    | 31 (25, 38)       | 4.5 (3.4, 5.6) | 17 (14.2, 20.2)   | 4.3 (3.4, 5.1)    |
| All                             | 4380421  | 3661  | 12.3 (10.4, 14.2) | 3.3 (2.7, 4)   | 0.9 (0.6, 1.1) | 166 (137, 197)   | 596 (505, 687)    | 152 (129, 174)       | 35 (29, 42)     | 127 (108, 146)    | 32 (28, 37)       | 4.5 (3.8, 5.3) | 16.3 (14.3, 18.3) | 4.1 (3.5, 4.7)    |
| <b>Canada</b>                   |          |       |                   |                |                |                  |                   |                      |                 |                   |                   |                |                   |                   |
| Age 25-69                       | 15832045 | 14455 | 11.3 (11.1, 11.4) | 3.8 (3.7, 3.9) | 3.9 (3.7, 4.1) | 384 (310, 463)   | 2439 (1985, 2876) | 4676 (4138, 5253)    | 31 (25, 37)     | 194 (157, 229)    | 371 (328, 418)    | 2.7 (2.3, 3)   | 16.9 (14.9, 18.6) | 32.4 (30.1, 34.5) |
| Age 70+                         | 2035270  | 40275 | 11.2 (10.9, 11.6) | 3.7 (3.6, 3.8) | 3.6 (3.4, 3.9) | 839 (613, 1059)  | 4823 (3703, 5928) | 8876 (7510, 10382)   | 469 (335, 601)  | 2682 (1996, 3332) | 4918 (4110, 5779) | 2.1 (1.6, 2.6) | 12 (9.6, 14.4)    | 22 (19, 24.8)     |
| Female                          | 9168300  | 24952 | 11.4 (8.9, 13.9)  | 3.9 (2.8, 4.9) | 3.9 (3.1, 4.7) | 581 (390, 787)   | 3090 (2179, 3980) | 5842 (4699, 7052)    | 86 (55, 120)    | 451 (306, 599)    | 850 (665, 1054)   | 2.3 (1.9, 2.8) | 12.4 (10.7, 14.1) | 23.4 (21.3, 25.4) |
| Male                            | 8699015  | 29796 | 11.1 (8.7, 13.5)  | 3.8 (2.8, 4.8) | 3.8 (3, 4.6)   | 642 (495, 782)   | 4172 (3311, 4970) | 7710 (6805, 8711)    | 101 (76, 126)   | 650 (499, 783)    | 1196 (1044, 1362) | 2.2 (1.8, 2.5) | 14 (12, 16)       | 25.9 (23.5, 28.2) |
| All                             | 17867315 | 54718 | 11.2 (9.5, 13)    | 3.8 (3.1, 4.5) | 3.9 (3.3, 4.4) | 1223 (988, 1469) | 7262 (6030, 8461) | 13552 (12019, 15181) | 93 (73, 113)    | 548 (445, 645)    | 1019 (897, 1153)  | 2.2 (2, 2.5)   | 13.3 (11.9, 14.6) | 24.8 (23.2, 26.3) |
| <b>Cape Verde</b>               |          |       |                   |                |                |                  |                   |                      |                 |                   |                   |                |                   |                   |
| Age 25-69                       | 110805   | 53    | 9.1 (8.2, 9.9)    | 3.9 (3.6, 4.2) | 0.8 (0.7, 1)   | 1 (1, 1)         | 9 (8, 11)         | 2 (2, 3)             | 5 (4, 7)        | 68 (57, 81)       | 18 (13, 24)       | 1.4 (1.1, 1.8) | 17.7 (15.6, 20)   | 4.6 (3.4, 5.8)    |
| Age 70+                         | 11261    | 69    | 9.1 (7.9, 10.3)   | 3.7 (3.3, 4.2) | 0.8 (0.6, 1)   | 1 (0, 1)         | 8 (6, 11)         | 2 (1, 3)             | 55 (34, 79)     | 744 (559, 933)    | 163 (97, 250)     | 0.9 (0.5, 1.3) | 12.3 (9.8, 15)    | 2.7 (1.6, 3.8)    |
| Female                          | 69392    | 48    | 9.1 (7.1, 11.1)   | 3.9 (2.9, 5)   | 0.8 (0.5, 1.2) | 1 (0, 1)         | 7 (5, 9)          | 2 (1, 2)             | 8 (5, 12)       | 105 (79, 135)     | 25 (15, 37)       | 1.1 (0.7, 1.5) | 14 (11.6, 16.4)   | 3.3 (2.1, 4.5)    |
| Male                            | 52674    | 73    | 9 (7, 11)         | 3.8 (2.8, 4.8) | 0.8 (0.5, 1.2) | 1 (1, 1)         | 11 (9, 13)        | 3 (2, 4)             | 13 (9, 17)      | 169 (138, 205)    | 41 (29, 56)       | 1.1 (0.7, 1.5) | 15.2 (12.4, 18)   | 3.6 (2.3, 5.1)    |
| All                             | 122066   | 121   | 9.1 (7.6, 10.5)   | 3.9 (3.2, 4.6) | 0.8 (0.6, 1.1) | 1 (1, 2)         | 18 (15, 21)       | 4 (3, 5)             | 10 (8, 13)      | 136 (114, 158)    | 33 (25, 42)       | 1.1 (0.9, 1.4) | 14.7 (12.9, 16.5) | 3.5 (2.7, 4.4)    |
| <b>Central African Republic</b> |          |       |                   |                |                |                  |                   |                      |                 |                   |                   |                |                   |                   |
| Age 25-69                       | 1057639  | 1211  | 10.9 (10.1, 11.7) | 7.5 (6.8, 8.1) | 0.9 (0.8, 1.1) | 43 (31, 60)      | 131 (104, 164)    | 68 (49, 90)          | 38 (27, 52)     | 115 (91, 143)     | 60 (43, 78)       | 3.5 (2.6, 4.6) | 10.8 (8.7, 12.8)  | 5.6 (4.2, 7.2)    |
| Age 70+                         | 67796    | 808   | 10.8 (9.5, 12.2)  | 7.2 (6, 8.4)   | 0.8 (0.6, 1.1) | 19 (11, 30)      | 61 (42, 81)       | 27 (16, 41)          | 282 (161, 445)  | 900 (625, 1211)   | 402 (237, 602)    | 2.3 (1.2, 3.4) | 7.5 (5.3, 9.8)    | 3.4 (1.9, 4.8)    |
| Female                          | 583707   | 836   | 11 (8.6, 13.4)    | 7.5 (5.7, 9.3) | 0.9 (0.5, 1.3) | 25 (17, 35)      | 74 (55, 95)       | 37 (26, 52)          | 43 (29, 60)     | 124 (92, 160)     | 63 (43, 87)       | 3 (1.9, 4.2)   | 8.8 (6.6, 11)     | 4.5 (3, 6.2)      |
| Male                            | 541728   | 1189  | 10.8 (8.4, 13.1)  | 7.4 (5.7, 9.2) | 0.9 (0.5, 1.3) | 37 (24, 52)      | 118 (91, 149)     | 58 (40, 79)          | 63 (42, 89)     | 203 (155, 255)    | 100 (68, 134)     | 3.1 (1.9, 4.4) | 10 (7.4, 12.4)    | 4.9 (3.1, 6.7)    |
| All                             | 1125435  | 2024  | 10.9 (9.2, 12.6)  | 7.5 (6.2, 8.7) | 0.9 (0.7, 1.2) | 62 (47, 80)      | 192 (160, 229)    | 96 (73, 121)         | 52 (40, 67)     | 162 (135, 193)    | 81 (61, 101)      | 3.1 (2.2, 4)   | 9.5 (7.9, 11.2)   | 4.7 (3.5, 5.9)    |
| <b>Chad</b>                     |          |       |                   |                |                |                  |                   |                      |                 |                   |                   |                |                   |                   |

|                   |           |        |                   |                |                |                   |                      |                      |                 |                   |                |                   |                   |                 |
|-------------------|-----------|--------|-------------------|----------------|----------------|-------------------|----------------------|----------------------|-----------------|-------------------|----------------|-------------------|-------------------|-----------------|
| Age 25-69         | 2041967   | 823    | 4.9 (4.3, 5.4)    | 5.1 (4.7, 5.5) | 0.7 (0.5, 0.8) | 14 (10, 19)       | 127 (104, 153)       | 25 (17, 35)          | 6 (5, 8)        | 57 (47, 68)       | 11 (8, 16)     | 1.7 (1.3, 2.2)    | 15.4 (13.2, 17.5) | 3.1 (2, 4.1)    |
| Age 70+           | 117576    | 627    | 4.8 (3.9, 5.6)    | 4.9 (4.3, 5.6) | 0.6 (0.4, 0.8) | 7 (4, 11)         | 68 (50, 89)          | 12 (6, 19)           | 60 (38, 90)     | 582 (428, 759)    | 100 (52, 159)  | 1.1 (0.6, 1.6)    | 10.9 (8.1, 13.7)  | 1.9 (0.9, 2.9)  |
| Female            | 1113894   | 810    | 4.9 (3.7, 6)      | 5.2 (3.9, 6.4) | 0.7 (0.3, 1)   | 11 (8, 16)        | 105 (83, 131)        | 20 (12, 30)          | 9 (6, 13)       | 84 (67, 104)      | 17 (10, 24)    | 1.4 (0.9, 2)      | 13 (10.4, 15.3)   | 2.5 (1.4, 3.7)  |
| Male              | 1045649   | 636    | 4.8 (3.7, 6)      | 5 (3.8, 6.3)   | 0.7 (0.3, 1)   | 10 (7, 14)        | 90 (71, 110)         | 17 (10, 23)          | 8 (6, 12)       | 78 (62, 96)       | 14 (9, 20)     | 1.5 (0.9, 2.1)    | 14.1 (11.1, 16.9) | 2.6 (1.4, 3.8)  |
| All               | 2159543   | 1449   | 4.9 (4, 5.7)      | 5.1 (4.2, 6)   | 0.7 (0.4, 0.9) | 21 (16, 27)       | 195 (165, 227)       | 37 (26, 49)          | 9 (7, 11)       | 81 (69, 95)       | 16 (11, 20)    | 1.5 (1.1, 1.8)    | 13.5 (11.6, 15.3) | 2.6 (1.7, 3.4)  |
| <b>Chile</b>      |           |        |                   |                |                |                   |                      |                      |                 |                   |                |                   |                   |                 |
| Age 25-69         | 6245247   | 3025   | 8 (7.5, 8.6)      | 5.3 (4.8, 5.7) | 1 (1, 1.1)     | 50 (35, 71)       | 438 (362, 523)       | 192 (165, 222)       | 10 (7, 14)      | 88 (72, 105)      | 39 (33, 45)    | 1.7 (1.2, 2.1)    | 14.5 (12.8, 16.2) | 6.4 (5.8, 7)    |
| Age 70+           | 520998    | 8006   | 8 (7, 9)          | 5.1 (4.4, 5.8) | 1 (0.9, 1)     | 86 (54, 131)      | 812 (617, 1017)      | 315 (255, 379)       | 180 (111, 280)  | 1699 (1279, 2154) | 656 (524, 798) | 1.1 (0.7, 1.5)    | 10.1 (8, 12.4)    | 3.9 (3.2, 4.6)  |
| Female            | 3508886   | 5154   | 8.1 (6.3, 10)     | 5.3 (4, 6.6)   | 1.1 (0.7, 1.4) | 60 (38, 96)       | 553 (403, 737)       | 227 (180, 280)       | 23 (14, 39)     | 217 (152, 296)    | 88 (69, 111)   | 1.2 (0.8, 1.5)    | 10.7 (9, 12.5)    | 4.4 (3.8, 5)    |
| Male              | 3257359   | 5878   | 7.9 (6.2, 9.7)    | 5.2 (3.9, 6.5) | 1 (0.6, 1.4)   | 77 (51, 113)      | 697 (547, 856)       | 281 (236, 329)       | 33 (21, 50)     | 301 (231, 377)    | 120 (99, 142)  | 1.3 (0.9, 1.8)    | 11.9 (9.9, 13.9)  | 4.8 (4.1, 5.4)  |
| All               | 6766245   | 11032  | 8 (6.8, 9.3)      | 5.2 (4.3, 6.2) | 1 (0.8, 1.3)   | 137 (100, 185)    | 1250 (1042, 1480)    | 507 (441, 574)       | 28 (20, 39)     | 258 (211, 309)    | 104 (89, 119)  | 1.2 (1, 1.5)      | 11.3 (9.9, 12.7)  | 4.6 (4.1, 5)    |
| <b>China</b>      |           |        |                   |                |                |                   |                      |                      |                 |                   |                |                   |                   |                 |
| Age 25-69         | 532407015 | 185826 | 7.3 (7.2, 7.4)    | 7.4 (7.2, 7.6) | 0.9 (0.9, 0.9) | 3875 (3193, 4656) | 19934 (16554, 23697) | 9517 (8201, 10867)   | 8 (7, 10)       | 42 (35, 50)       | 20 (17, 23)    | 2.1 (1.8, 2.4)    | 10.7 (9.4, 12.1)  | 5.1 (4.6, 5.6)  |
| Age 70+           | 42126832  | 259150 | 7.2 (7.1, 7.4)    | 7.2 (6.9, 7.4) | 0.8 (0.8, 0.9) | 3390 (2493, 4419) | 19195 (14262, 24333) | 7641 (6044, 9408)    | 83 (61, 108)    | 473 (351, 600)    | 187 (149, 229) | 1.3 (1, 1.6)      | 7.4 (5.8, 9)      | 3 (2.5, 3.5)    |
| Female            | 278837121 | 226095 | 7.4 (5.7, 9)      | 7.5 (5.7, 9.3) | 0.9 (0.5, 1.3) | 3538 (2651, 4478) | 18672 (14068, 23290) | 8356 (6816, 10185)   | 14 (10, 18)     | 74 (55, 92)       | 33 (27, 40)    | 1.6 (1.3, 1.9)    | 8.3 (7, 9.7)      | 3.7 (3.3, 4.2)  |
| Male              | 295696726 | 218553 | 7.2 (5.6, 8.8)    | 7.3 (5.6, 9)   | 0.9 (0.5, 1.2) | 3727 (2989, 4507) | 20457 (16694, 24460) | 8802 (7451, 10178)   | 15 (12, 18)     | 82 (66, 98)       | 35 (29, 41)    | 1.7 (1.4, 2.1)    | 9.4 (7.8, 10.9)   | 4 (3.5, 4.5)    |
| All               | 574533847 | 445285 | 7.3 (6.1, 8.4)    | 7.4 (6.1, 8.6) | 0.9 (0.6, 1.1) | 7265 (6130, 8472) | 39129 (33480, 45280) | 17158 (14934, 19285) | 14 (12, 17)     | 78 (66, 90)       | 34 (30, 38)    | 1.6 (1.4, 1.9)    | 8.8 (7.8, 9.9)    | 3.9 (3.5, 4.2)  |
| <b>Colombia</b>   |           |        |                   |                |                |                   |                      |                      |                 |                   |                |                   |                   |                 |
| Age 25-69         | 13331387  | 10032  | 8.4 (8.2, 8.6)    | 5.1 (5, 5.3)   | 1.1 (1, 1.1)   | 158 (130, 186)    | 1540 (1313, 1759)    | 727 (643, 815)       | 14 (12, 17)     | 137 (116, 157)    | 64 (57, 72)    | 1.6 (1.3, 1.8)    | 15.4 (13.5, 17.2) | 7.2 (6.5, 8)    |
| Age 70+           | 877813    | 13060  | 8.4 (8, 8.7)      | 4.9 (4.7, 5.2) | 1 (0.9, 1.1)   | 131 (99, 168)     | 1378 (1075, 1677)    | 565 (468, 669)       | 156 (116, 201)  | 1644 (1280, 2016) | 671 (554, 796) | 1 (0.8, 1.3)      | 10.6 (8.3, 12.9)  | 4.3 (3.6, 5.1)  |
| Female            | 7382809   | 10359  | 8.5 (6.6, 10.4)   | 5.2 (3.9, 6.5) | 1.1 (0.7, 1.5) | 127 (100, 158)    | 1265 (1041, 1505)    | 570 (484, 664)       | 20 (16, 25)     | 201 (163, 239)    | 90 (76, 105)   | 1.2 (1, 1.5)      | 12.2 (10, 14.2)   | 5.5 (4.7, 6.3)  |
| Male              | 6826391   | 12737  | 8.3 (6.4, 10.1)   | 5 (3.8, 6.3)   | 1.1 (0.7, 1.5) | 162 (130, 197)    | 1653 (1366, 1930)    | 722 (629, 822)       | 27 (22, 33)     | 279 (230, 326)    | 122 (106, 138) | 1.3 (1, 1.5)      | 13 (10.9, 14.9)   | 5.7 (4.9, 6.4)  |
| All               | 14209200  | 23098  | 8.4 (7.1, 9.7)    | 5.1 (4.2, 6)   | 1.1 (0.8, 1.4) | 289 (247, 334)    | 2918 (2543, 3288)    | 1292 (1162, 1431)    | 24 (20, 28)     | 238 (208, 270)    | 105 (94, 116)  | 1.2 (1, 1.4)      | 12.6 (11.2, 14.1) | 5.6 (5, 6.1)    |
| <b>Comoros</b>    |           |        |                   |                |                |                   |                      |                      |                 |                   |                |                   |                   |                 |
| Age 25-69         | 142631    | 93     | 16.1 (14.7, 17.5) | 2.7 (2.4, 2.9) | 1.3 (0.9, 1.7) | 13 (10, 15)       | 19 (15, 22)          | 9 (6, 12)            | 81 (66, 97)     | 121 (99, 144)     | 58 (39, 79)    | 13.6 (11.7, 15.6) | 20.4 (17.8, 23.1) | 9.7 (6.8, 12.6) |
| Age 70+           | 7564      | 66     | 16.1 (13.7, 18.4) | 2.6 (2.2, 3)   | 1.2 (0.6, 1.7) | 6 (5, 8)          | 9 (7, 12)            | 4 (2, 6)             | 834 (621, 1040) | 1253 (948, 1551)  | 527 (250, 830) | 9.4 (7.1, 11.7)   | 14.2 (11, 17.4)   | 6 (2.8, 9.1)    |
| Female            | 76235     | 77     | 16.4 (12.9, 19.9) | 2.7 (1.9, 3.4) | 1.3 (0.9, 1.7) | 9 (7, 11)         | 13 (10, 16)          | 6 (3, 9)             | 102 (78, 127)   | 148 (114, 183)    | 67 (40, 97)    | 11.7 (9.5, 14.1)  | 17 (14, 20)       | 7.7 (4.4, 11)   |
| Male              | 73960     | 82     | 15.9 (12.5, 19.3) | 2.6 (1.9, 3.4) | 1.3 (0.9, 1.7) | 10 (8, 12)        | 15 (12, 18)          | 7 (4, 10)            | 121 (97, 148)   | 186 (149, 226)    | 88 (54, 126)   | 12 (9.8, 14.3)    | 18.5 (15.1, 22.1) | 8.7 (4.8, 12.4) |
| All               | 150195    | 158    | 16.1 (13.7, 18.6) | 2.6 (2.1, 3.2) | 1.3 (1, 1.6)   | 19 (16, 22)       | 28 (24, 32)          | 13 (9, 17)           | 111 (95, 129)   | 167 (142, 191)    | 77 (55, 101)   | 11.9 (10.3, 13.4) | 17.8 (15.5, 20.1) | 8.1 (5.5, 10.7) |
| <b>Congo</b>      |           |        |                   |                |                |                   |                      |                      |                 |                   |                |                   |                   |                 |
| Age 25-69         | 821712    | 757    | 12.8 (11.8, 13.8) | 4.5 (4.2, 4.9) | 1 (0.8, 1.1)   | 47 (36, 59)       | 125 (101, 153)       | 45 (32, 63)          | 52 (40, 65)     | 139 (113, 169)    | 50 (36, 69)    | 6.2 (5, 7.3)      | 16.6 (14.5, 18.9) | 6 (4.4, 7.6)    |
| Age 70+           | 53075     | 674    | 12.7 (11.1, 14.4) | 4.4 (3.8, 5)   | 0.9 (0.6, 1.2) | 29 (21, 38)       | 78 (59, 98)          | 25 (15, 37)          | 548 (398, 734)  | 1475 (1128, 1867) | 475 (286, 706) | 4.3 (3, 5.6)      | 11.5 (9, 14.3)    | 3.7 (2, 5.4)    |
| Female            | 446517    | 625    | 12.9 (10.1, 15.6) | 4.5 (3.4, 5.7) | 1 (0.6, 1.3)   | 33 (24, 43)       | 83 (64, 104)         | 29 (19, 42)          | 68 (50, 87)     | 172 (132, 214)    | 60 (39, 86)    | 5.2 (3.9, 6.4)    | 13.3 (10.8, 15.6) | 4.7 (2.9, 6.3)  |
| Male              | 428270    | 810    | 12.6 (9.9, 15.3)  | 4.5 (3.3, 5.6) | 1 (0.6, 1.3)   | 43 (33, 55)       | 120 (96, 146)        | 41 (28, 56)          | 91 (72, 116)    | 254 (206, 309)    | 88 (59, 118)   | 5.3 (4, 6.6)      | 14.8 (12.4, 17.4) | 5.1 (3.2, 7.1)  |
| All               | 874787    | 1430   | 12.8 (10.8, 14.7) | 4.5 (3.7, 5.3) | 1 (0.7, 1.2)   | 76 (62, 90)       | 203 (173, 236)       | 70 (53, 89)          | 79 (66, 94)     | 213 (182, 247)    | 74 (56, 93)    | 5.3 (4.4, 6.2)    | 14.2 (12.3, 16.1) | 4.9 (3.6, 6.2)  |
| <b>Costa Rica</b> |           |        |                   |                |                |                   |                      |                      |                 |                   |                |                   |                   |                 |
| Age 25-69         | 1292831   | 622    | 9.6 (8.8, 10.4)   | 3.9 (3.5, 4.2) | 1.2 (1.2, 1.3) | 9 (6, 11)         | 109 (91, 127)        | 53 (46, 60)          | 8 (6, 10)       | 100 (84, 117)     | 49 (43, 55)    | 1.4 (1, 1.7)      | 17.5 (15.3, 19.6) | 8.5 (7.6, 9.3)  |
| Age 70+           | 103402    | 1405   | 9.6 (8.3, 10.9)   | 3.7 (3.3, 4.2) | 1.1 (1.1, 1.2) | 12 (8, 18)        | 167 (127, 206)       | 71 (58, 85)          | 128 (78, 200)   | 1782 (1317, 2219) | 757 (609, 921) | 0.9 (0.5, 1.2)    | 11.9 (9.5, 14.4)  | 5.1 (4.3, 6)    |

|                                         |          |       |                   |                 |                |                   |                   |                   |                   |                   |                   |                 |                   |                  |
|-----------------------------------------|----------|-------|-------------------|-----------------|----------------|-------------------|-------------------|-------------------|-------------------|-------------------|-------------------|-----------------|-------------------|------------------|
| Female                                  | 691093   | 867   | 9.7 (7.6, 11.8)   | 3.9 (2.9, 4.9)  | 1.2 (0.8, 1.7) | 8 (5, 13)         | 113 (84, 144)     | 52 (42, 63)       | 15 (9, 23)        | 196 (141, 252)    | 89 (71, 110)      | 1 (0.7, 1.3)    | 13 (10.8, 15.2)   | 5.9 (5.1, 6.7)   |
| Male                                    | 705140   | 1157  | 9.6 (7.5, 11.7)   | 3.8 (2.8, 4.8)  | 1.2 (0.8, 1.6) | 12 (9, 17)        | 163 (132, 197)    | 72 (62, 84)       | 20 (14, 28)       | 264 (211, 320)    | 117 (100, 137)    | 1 (0.7, 1.4)    | 14.1 (12, 16.4)   | 6.3 (5.4, 7.2)   |
| All                                     | 1396233  | 2025  | 9.6 (8.1, 11.1)   | 3.8 (3.1, 4.6)  | 1.2 (0.9, 1.5) | 21 (16, 27)       | 276 (233, 320)    | 124 (110, 140)    | 17 (13, 23)       | 230 (193, 269)    | 103 (91, 117)     | 1 (0.8, 1.2)    | 13.6 (12, 15.3)   | 6.1 (5.5, 6.7)   |
| <b>Croatia</b>                          |          |       |                   |                 |                |                   |                   |                   |                   |                   |                   |                 |                   |                  |
| Age 25-69                               | 4412656  | 1951  | 11.3 (10.5, 12.1) | 8.6 (8, 9.2)    | 1.3 (1.2, 1.3) | 137 (111, 163)    | 429 (354, 505)    | 92 (66, 122)      | 33 (26, 39)       | 103 (84, 123)     | 22 (16, 29)       | 7 (5.9, 8.1)    | 22 (19.4, 24.6)   | 4.7 (3.5, 6)     |
| Age 70+                                 | 181311   | 1136  | 11.4 (9.8, 13)    | 8.3 (7.3, 9.4)  | 1.2 (1.1, 1.3) | 53 (38, 68)       | 168 (126, 213)    | 31 (18, 46)       | 292 (210, 375)    | 931 (703, 1177)   | 170 (96, 255)     | 4.6 (3.5, 5.8)  | 14.8 (11.5, 18)   | 2.7 (1.3, 4)     |
| Female                                  | 2075853  | 1264  | 11.4 (8.9, 13.9)  | 8.7 (6.7, 10.7) | 1.3 (0.8, 1.7) | 77 (59, 96)       | 232 (181, 287)    | 49 (32, 68)       | 42 (32, 53)       | 128 (99, 158)     | 26 (17, 37)       | 6 (4.7, 7.4)    | 18.4 (15.3, 21.4) | 3.9 (2.5, 5.3)   |
| Male                                    | 2518114  | 1818  | 11.2 (8.7, 13.6)  | 8.4 (6.4, 10.4) | 1.3 (0.8, 1.7) | 113 (89, 138)     | 365 (295, 437)    | 73 (49, 101)      | 52 (40, 64)       | 169 (135, 203)    | 33 (22, 47)       | 6.2 (4.9, 7.5)  | 20.1 (16.7, 23.5) | 4 (2.6, 5.6)     |
| All                                     | 4593967  | 3081  | 11.4 (9.6, 13.1)  | 8.6 (7.1, 10)   | 1.3 (1, 1.6)   | 190 (160, 222)    | 597 (510, 687)    | 122 (93, 155)     | 47 (40, 55)       | 149 (127, 171)    | 30 (23, 38)       | 6.2 (5.3, 7.1)  | 19.4 (17.1, 21.7) | 4 (2.8, 4.9)     |
| <b>Cuba</b>                             |          |       |                   |                 |                |                   |                   |                   |                   |                   |                   |                 |                   |                  |
| Age 25-69                               | 2677200  | 3931  | 7.5 (6.9, 8.1)    | 5.5 (5.1, 5.9)  | 0.5 (0.4, 0.6) | 156 (111, 211)    | 318 (244, 400)    | 348 (299, 398)    | 61 (44, 83)       | 125 (96, 159)     | 137 (118, 157)    | 4 (3, 4.8)      | 8.1 (6.6, 9.5)    | 8.8 (8, 9.7)     |
| Age 70+                                 | 305100   | 8652  | 7.4 (6.5, 8.3)    | 5.3 (4.6, 5.9)  | 0.5 (0.4, 0.6) | 244 (146, 373)    | 493 (329, 680)    | 469 (378, 569)    | 792 (479, 1207)   | 1602 (1080, 2212) | 1525 (1228, 1851) | 2.8 (1.6, 4)    | 5.7 (3.7, 7.6)    | 5.4 (4.4, 6.5)   |
| Female                                  | 1581601  | 6657  | 7.6 (5.9, 9.2)    | 5.5 (4.2, 6.9)  | 0.5 (0.2, 0.8) | 211 (124, 332)    | 393 (256, 574)    | 400 (317, 499)    | 195 (108, 329)    | 365 (222, 558)    | 365 (277, 473)    | 3.2 (2.3, 4)    | 5.9 (4.6, 7.3)    | 6 (5.3, 6.7)     |
| Male                                    | 1400699  | 5909  | 7.4 (5.7, 9)      | 5.4 (4.1, 6.8)  | 0.5 (0.2, 0.8) | 189 (131, 266)    | 417 (313, 537)    | 417 (351, 484)    | 180 (118, 265)    | 402 (293, 532)    | 393 (326, 466)    | 3.2 (2.2, 4.2)  | 7.1 (5.5, 8.7)    | 7 (6.1, 8)       |
| All                                     | 2982300  | 12580 | 7.5 (6.3, 8.6)    | 5.5 (4.5, 6.4)  | 0.5 (0.3, 0.7) | 400 (289, 540)    | 811 (634, 1011)   | 817 (716, 938)    | 188 (129, 262)    | 382 (288, 492)    | 378 (326, 442)    | 3.2 (2.6, 3.8)  | 6.4 (5.3, 7.5)    | 6.5 (5.9, 7.1)   |
| <b>Cyprus</b>                           |          |       |                   |                 |                |                   |                   |                   |                   |                   |                   |                 |                   |                  |
| Age 25-69                               | 5246745  | 5399  | 9.2 (8.5, 9.9)    | 6.2 (5.7, 6.7)  | 1.2 (1, 1.4)   | 94 (68, 123)      | 767 (642, 882)    | 81 (54, 116)      | 21 (16, 28)       | 175 (147, 202)    | 19 (12, 27)       | 1.7 (1.3, 2.2)  | 14.2 (12.5, 15.9) | 1.5 (1, 2)       |
| Age 70+                                 | 632227   | 12869 | 9.1 (8, 10.3)     | 6 (5.2, 6.7)    | 1.1 (0.8, 1.4) | 142 (87, 209)     | 1265 (949, 1585)  | 108 (54, 182)     | 229 (139, 343)    | 2033 (1513, 2554) | 174 (86, 298)     | 1.1 (0.7, 1.6)  | 9.8 (7.8, 11.9)   | 0.8 (0.4, 1.3)   |
| Female                                  | 2949777  | 8224  | 9.2 (7.2, 11.3)   | 6.3 (4.7, 7.8)  | 1.2 (0.8, 1.6) | 104 (66, 162)     | 878 (665, 1110)   | 84 (42, 140)      | 43 (27, 67)       | 359 (269, 458)    | 34 (17, 58)       | 1.3 (0.9, 1.7)  | 10.7 (9, 12.4)    | 1 (0.6, 1.4)     |
| Male                                    | 2929195  | 10025 | 9.1 (7.1, 11.2)   | 6.1 (4.6, 7.6)  | 1.2 (0.8, 1.6) | 132 (90, 189)     | 1154 (896, 1408)  | 106 (59, 165)     | 51 (35, 73)       | 448 (349, 544)    | 41 (23, 64)       | 1.3 (0.9, 1.7)  | 11.5 (9.6, 13.5)  | 1.1 (0.6, 1.5)   |
| All                                     | 5878972  | 18262 | 9.2 (7.8, 10.7)   | 6.2 (5.1, 7.3)  | 1.2 (0.9, 1.5) | 236 (176, 311)    | 2032 (1675, 2365) | 190 (122, 271)    | 47 (35, 63)       | 403 (331, 470)    | 38 (24, 54)       | 1.3 (1, 1.6)    | 11.1 (9.8, 12.5)  | 1 (0.7, 1.3)     |
| <b>Czech Republic</b>                   |          |       |                   |                 |                |                   |                   |                   |                   |                   |                   |                 |                   |                  |
| Age 25-69                               | 322859   | 289   | 16.5 (15.3, 17.8) | 7.5 (7, 8.1)    | 1.5 (1.4, 1.6) | 6 (4, 8)          | 36 (29, 44)       | 23 (17, 31)       | 18 (12, 26)       | 118 (95, 143)     | 75 (55, 100)      | 1.9 (1.4, 2.4)  | 12.6 (11, 14.3)   | 8 (6.5, 9.6)     |
| Age 70+                                 | 45839    | 788   | 16.5 (14.3, 18.6) | 7.3 (6.3, 8.2)  | 1.4 (1.3, 1.5) | 10 (6, 16)        | 71 (52, 91)       | 38 (24, 54)       | 221 (127, 367)    | 1590 (1148, 2067) | 853 (539, 1230)   | 1.2 (0.7, 1.9)  | 9 (6.8, 11)       | 4.8 (3, 6.6)     |
| Female                                  | 191087   | 455   | 16.6 (13, 20.2)   | 7.6 (5.8, 9.4)  | 1.5 (1, 1.9)   | 6 (4, 11)         | 43 (29, 59)       | 24 (14, 37)       | 34 (20, 64)       | 238 (161, 330)    | 134 (77, 205)     | 1.4 (0.9, 1.8)  | 9.5 (7.8, 11.2)   | 5.3 (4, 6.7)     |
| Male                                    | 177611   | 618   | 16.4 (12.9, 19.9) | 7.4 (5.7, 9.2)  | 1.5 (1, 1.9)   | 9 (6, 14)         | 64 (48, 81)       | 37 (26, 50)       | 52 (33, 78)       | 366 (275, 464)    | 211 (147, 283)    | 1.5 (1, 2)      | 10.4 (8.7, 12.4)  | 6 (4.3, 7.5)     |
| All                                     | 368698   | 1075  | 16.5 (14, 19)     | 7.5 (6.2, 8.7)  | 1.5 (1.2, 1.8) | 15 (11, 22)       | 107 (86, 131)     | 61 (46, 80)       | 43 (30, 62)       | 300 (239, 369)    | 172 (128, 224)    | 1.4 (1.1, 1.8)  | 10 (8.7, 11.2)    | 5.7 (4.6, 6.8)   |
| <b>Côte d'Ivoire</b>                    |          |       |                   |                 |                |                   |                   |                   |                   |                   |                   |                 |                   |                  |
| Age 25-69                               | 5780288  | 13139 | 13 (12, 14)       | 2.1 (1.9, 2.3)  | 0.8 (0.7, 1)   | 1301 (1005, 1628) | 1301 (1005, 1628) | 1413 (1189, 1631) | 245 (188, 309)    | 245 (188, 309)    | 266 (223, 308)    | 9.9 (8.4, 11.4) | 9.9 (8.4, 11.4)   | 10.8 (9.7, 11.9) |
| Age 70+                                 | 789419   | 26750 | 12.9 (11.2, 14.6) | 2 (1.7, 2.4)    | 0.8 (0.5, 1)   | 1892 (1388, 2475) | 1892 (1388, 2475) | 1867 (1546, 2220) | 2490 (1797, 3257) | 2490 (1797, 3257) | 2447 (2023, 2920) | 7.1 (5.2, 8.9)  | 7.1 (5.1, 9)      | 7 (5.7, 8.1)     |
| Female                                  | 3479243  | 19224 | 13.1 (10.3, 16)   | 2.1 (1.5, 2.8)  | 0.8 (0.5, 1.2) | 1408 (967, 1931)  | 1408 (967, 1931)  | 1471 (1177, 1803) | 462 (314, 648)    | 462 (314, 648)    | 482 (377, 598)    | 7.3 (5.8, 8.8)  | 7.3 (5.7, 8.7)    | 7.6 (6.7, 8.5)   |
| Male                                    | 3090464  | 20662 | 12.9 (10.1, 15.7) | 2.1 (1.4, 2.7)  | 0.8 (0.5, 1.2) | 1785 (1397, 2222) | 1785 (1397, 2222) | 1809 (1543, 2083) | 660 (511, 836)    | 660 (511, 836)    | 665 (564, 767)    | 8.6 (6.8, 10.4) | 8.6 (7, 10.3)     | 8.8 (7.7, 9.8)   |
| All                                     | 6569707  | 39906 | 13 (11, 15)       | 2.1 (1.6, 2.6)  | 0.8 (0.6, 1.1) | 3194 (2594, 3874) | 3194 (2594, 3874) | 3280 (2884, 3686) | 558 (449, 683)    | 558 (449, 683)    | 570 (496, 643)    | 8 (6.8, 9.2)    | 8 (6.9, 9.1)      | 8.2 (7.5, 9)     |
| <b>Democratic Republic of the Congo</b> |          |       |                   |                 |                |                   |                   |                   |                   |                   |                   |                 |                   |                  |
| Age 25-69                               | 11982120 | 6531  | 12.6 (11.7, 13.6) | 3.8 (3.5, 4.1)  | 0.8 (0.7, 0.9) | 382 (300, 473)    | 1175 (962, 1415)  | 261 (183, 349)    | 31 (24, 38)       | 94 (77, 113)      | 21 (15, 28)       | 5.8 (4.8, 6.8)  | 18 (15.8, 20.3)   | 4 (3, 5)         |
| Age 70+                                 | 564101   | 4888  | 12.5 (10.8, 14.1) | 3.6 (3.1, 4.1)  | 0.7 (0.5, 0.9) | 197 (138, 264)    | 615 (458, 782)    | 121 (70, 179)     | 350 (247, 468)    | 1095 (815, 1386)  | 215 (125, 316)    | 4 (2.8, 5.2)    | 12.6 (9.7, 15.5)  | 2.5 (1.3, 3.7)   |
| Female                                  | 6535248  | 5875  | 12.7 (9.9, 15.4)  | 3.8 (2.8, 4.8)  | 0.8 (0.4, 1.1) | 294 (219, 380)    | 878 (685, 1082)   | 190 (128, 262)    | 43 (32, 56)       | 129 (101, 159)    | 28 (19, 38)       | 5 (3.8, 6.2)    | 14.9 (12.2, 17.6) | 3.2 (2, 4.4)     |
| Male                                    | 6010973  | 5529  | 12.5 (9.8, 15.2)  | 3.7 (2.7, 4.7)  | 0.8 (0.4, 1.1) | 285 (218, 362)    | 912 (731, 1120)   | 192 (127, 276)    | 46 (35, 59)       | 148 (119, 182)    | 31 (21, 45)       | 5.2 (3.9, 6.4)  | 16.5 (13.6, 19.6) | 3.5 (2.1, 4.8)   |

|                           |          |       |                   |                |                |                   |                   |                      |                   |                   |                   |                 |                   |                   |
|---------------------------|----------|-------|-------------------|----------------|----------------|-------------------|-------------------|----------------------|-------------------|-------------------|-------------------|-----------------|-------------------|-------------------|
| All                       | 12546221 | 11443 | 12.6 (10.6, 14.5) | 3.8 (3.1, 4.5) | 0.8 (0.5, 1)   | 579 (475, 691)    | 1791 (1518, 2083) | 382 (293, 491)       | 45 (37, 53)       | 139 (118, 161)    | 30 (23, 38)       | 5.1 (4.2, 5.9)  | 15.6 (13.7, 17.7) | 3.3 (2.5, 4.3)    |
| <b>Denmark</b>            |          |       |                   |                |                |                   |                   |                      |                   |                   |                   |                 |                   |                   |
| Age 25-69                 | 2941229  | 3697  | 14.5 (14.2, 14.8) | 3.9 (3.6, 4.3) | 1.1 (1, 1.1)   | 337 (272, 410)    | 615 (502, 734)    | 236 (200, 278)       | 140 (112, 172)    | 256 (208, 306)    | 98 (83, 116)      | 9.1 (7.9, 10.3) | 16.6 (14.8, 18.4) | 6.4 (5.8, 7)      |
| Age 70+                   | 559368   | 13820 | 14.4 (14, 14.9)   | 3.8 (3.3, 4.3) | 1 (0.9, 1.1)   | 913 (679, 1164)   | 1632 (1253, 2016) | 552 (440, 679)       | 1718 (1268, 2191) | 3075 (2339, 3816) | 1037 (824, 1275)  | 6.6 (5.1, 8.1)  | 11.8 (9.1, 14.4)  | 4 (3.3, 4.7)      |
| Female                    | 1807022  | 8236  | 14.6 (11.5, 17.8) | 4 (2.9, 5)     | 1.1 (0.7, 1.5) | 578 (381, 797)    | 994 (672, 1328)   | 350 (261, 457)       | 330 (215, 454)    | 566 (378, 758)    | 200 (148, 261)    | 7 (6, 8.1)      | 12.1 (10.2, 13.9) | 4.2 (3.8, 4.8)    |
| Male                      | 1693575  | 9292  | 14.3 (11.2, 17.4) | 3.9 (2.9, 4.9) | 1 (0.7, 1.4)   | 671 (519, 831)    | 1253 (993, 1500)  | 439 (364, 517)       | 453 (349, 565)    | 846 (669, 1022)   | 296 (245, 349)    | 7.2 (5.9, 8.5)  | 13.5 (11.6, 15.5) | 4.7 (4.1, 5.3)    |
| All                       | 3500597  | 17544 | 14.5 (12.3, 16.7) | 3.9 (3.2, 4.7) | 1.1 (0.8, 1.3) | 1249 (1006, 1517) | 2247 (1827, 2669) | 788 (671, 917)       | 390 (315, 473)    | 703 (572, 832)    | 247 (211, 288)    | 7.1 (6.3, 8)    | 12.8 (11.4, 14.1) | 4.5 (4.1, 4.9)    |
| <b>Djibouti</b>           |          |       |                   |                |                |                   |                   |                      |                   |                   |                   |                 |                   |                   |
| Age 25-69                 | 194724   | 98    | 14 (12.9, 15.3)   | 3.7 (3.4, 4.1) | 0.8 (0.7, 0.9) | 9 (7, 11)         | 18 (14, 23)       | 4 (3, 6)             | 48 (36, 61)       | 98 (73, 123)      | 23 (15, 32)       | 9.2 (7.7, 10.6) | 18.7 (16.3, 21)   | 4.4 (3.2, 5.6)    |
| Age 70+                   | 7204     | 54    | 14 (12.1, 15.9)   | 3.6 (3, 4.2)   | 0.7 (0.5, 1)   | 3 (2, 5)          | 7 (5, 9)          | 1 (1, 2)             | 482 (338, 662)    | 990 (714, 1316)   | 204 (106, 326)    | 6.2 (4.4, 7.9)  | 12.8 (9.9, 16.1)  | 2.6 (1.3, 4)      |
| Female                    | 102911   | 68    | 14.2 (11.2, 17.3) | 3.7 (2.7, 4.7) | 0.8 (0.4, 1.2) | 5 (4, 7)          | 11 (8, 14)        | 2 (1, 4)             | 59 (41, 78)       | 114 (80, 150)     | 26 (15, 40)       | 8 (6.5, 9.6)    | 15.7 (13.1, 18.4) | 3.6 (2.2, 5.1)    |
| Male                      | 99017    | 85    | 13.8 (10.8, 16.7) | 3.7 (2.7, 4.7) | 0.8 (0.4, 1.1) | 7 (5, 9)          | 15 (11, 19)       | 3 (2, 5)             | 75 (55, 97)       | 158 (118, 202)    | 35 (22, 50)       | 8.1 (6.4, 10)   | 17.2 (14.4, 20.2) | 3.9 (2.3, 5.4)    |
| All                       | 201928   | 153   | 14 (11.9, 16.1)   | 3.7 (3, 4.4)   | 0.8 (0.5, 1)   | 12 (10, 15)       | 25 (21, 30)       | 6 (4, 8)             | 66 (54, 81)       | 136 (111, 163)    | 31 (21, 41)       | 8.1 (6.8, 9.3)  | 16.5 (14.4, 18.7) | 3.8 (2.6, 4.9)    |
| <b>Dominica</b>           |          |       |                   |                |                |                   |                   |                      |                   |                   |                   |                 |                   |                   |
| Age 25-69                 | 29521    | 13    | 8.5 (7.9, 9.2)    | 3.4 (3.2, 3.7) | 0.5 (0.4, 0.6) | 0 (0, 0)          | 2 (2, 3)          | 0 (0, 0)             | 6 (4, 8)          | 85 (71, 101)      | 7 (4, 10)         | 1.2 (1, 1.5)    | 17.7 (15.6, 19.7) | 1.4 (1, 1.8)      |
| Age 70+                   | 2849     | 39    | 8.5 (7.5, 9.5)    | 3.3 (2.9, 3.8) | 0.5 (0.3, 0.6) | 0 (0, 0)          | 5 (4, 6)          | 0 (0, 1)             | 117 (76, 179)     | 1822 (1379, 2267) | 119 (57, 203)     | 0.8 (0.5, 1.1)  | 12.5 (10.1, 15.2) | 0.8 (0.3, 1.3)    |
| Female                    | 16530    | 27    | 8.6 (6.7, 10.6)   | 3.5 (2.5, 4.4) | 0.5 (0.2, 0.8) | 0 (0, 0)          | 4 (3, 5)          | 0 (0, 0)             | 18 (11, 28)       | 267 (195, 337)    | 19 (9, 34)        | 0.9 (0.6, 1.2)  | 13.5 (11.4, 15.6) | 1 (0.6, 1.4)      |
| Male                      | 15840    | 25    | 8.4 (6.5, 10.3)   | 3.4 (2.5, 4.3) | 0.5 (0.2, 0.8) | 0 (0, 0)          | 3 (3, 4)          | 0 (0, 0)             | 16 (11, 24)       | 243 (187, 300)    | 17 (8, 27)        | 0.9 (0.6, 1.2)  | 14.1 (12, 16.2)   | 1 (0.5, 1.4)      |
| All                       | 32370    | 52    | 8.5 (7.2, 9.9)    | 3.4 (2.8, 4.1) | 0.5 (0.3, 0.7) | 0 (0, 1)          | 7 (6, 8)          | 0 (0, 1)             | 17 (12, 23)       | 255 (208, 299)    | 18 (11, 26)       | 0.9 (0.7, 1.1)  | 13.8 (12.3, 15.3) | 1 (0.7, 1.2)      |
| <b>Dominican Republic</b> |          |       |                   |                |                |                   |                   |                      |                   |                   |                   |                 |                   |                   |
| Age 25-69                 | 2793268  | 2256  | 7.9 (7.3, 8.5)    | 6 (5.5, 6.6)   | 0.9 (0.8, 1)   | 44 (32, 59)       | 303 (254, 358)    | 116 (98, 136)        | 17 (12, 22)       | 114 (96, 135)     | 44 (37, 51)       | 1.9 (1.4, 2.5)  | 13.4 (11.6, 15.3) | 5.1 (4.4, 5.9)    |
| Age 70+                   | 166279   | 2747  | 7.9 (6.9, 8.8)    | 5.8 (5, 6.7)   | 0.8 (0.7, 0.9) | 34 (21, 52)       | 256 (197, 319)    | 84 (65, 107)         | 229 (142, 359)    | 1729 (1310, 2194) | 565 (426, 721)    | 1.2 (0.7, 1.8)  | 9.3 (7, 11.4)     | 3.1 (2.4, 3.7)    |
| Female                    | 1462167  | 2154  | 8 (6.2, 9.8)      | 6.1 (4.6, 7.6) | 0.9 (0.5, 1.3) | 33 (23, 48)       | 234 (186, 285)    | 86 (68, 105)         | 32 (21, 52)       | 229 (172, 289)    | 82 (62, 104)      | 1.5 (1, 2.1)    | 10.9 (8.9, 12.8)  | 4 (3.2, 4.7)      |
| Male                      | 1497380  | 2851  | 7.8 (6, 9.5)      | 5.9 (4.5, 7.4) | 0.9 (0.5, 1.2) | 45 (31, 62)       | 325 (262, 393)    | 115 (94, 138)        | 38 (25, 56)       | 278 (217, 338)    | 96 (77, 117)      | 1.6 (1, 2.2)    | 11.4 (9.3, 13.5)  | 4 (3.2, 4.8)      |
| All                       | 2959547  | 5003  | 7.9 (6.6, 9.1)    | 6 (5, 7.1)     | 0.9 (0.6, 1.2) | 78 (59, 100)      | 559 (473, 636)    | 200 (174, 231)       | 35 (26, 46)       | 253 (210, 295)    | 89 (76, 103)      | 1.6 (1.2, 2)    | 11.2 (9.6, 12.6)  | 4 (3.5, 4.5)      |
| <b>Ecuador</b>            |          |       |                   |                |                |                   |                   |                      |                   |                   |                   |                 |                   |                   |
| Age 25-69                 | 3912315  | 1509  | 10.5 (9.6, 11.5)  | 5.1 (4.7, 5.5) | 0.9 (0.8, 0.9) | 33 (26, 43)       | 236 (203, 273)    | 78 (68, 89)          | 9 (7, 12)         | 66 (56, 76)       | 22 (19, 25)       | 2.2 (1.7, 2.8)  | 15.6 (13.6, 17.7) | 5.2 (4.5, 5.8)    |
| Age 70+                   | 275786   | 2560  | 10.4 (8.9, 11.9)  | 5 (4.3, 5.6)   | 0.8 (0.7, 0.9) | 37 (23, 55)       | 265 (199, 330)    | 73 (59, 91)          | 143 (86, 218)     | 1021 (757, 1279)  | 281 (225, 350)    | 1.4 (0.8, 2.1)  | 10.4 (8.1, 12.6)  | 2.9 (2.3, 3.4)    |
| Female                    | 2110725  | 1760  | 10.6 (8.3, 12.9)  | 5.2 (3.9, 6.5) | 0.9 (0.5, 1.2) | 33 (22, 50)       | 209 (161, 256)    | 63 (53, 77)          | 19 (12, 29)       | 118 (89, 148)     | 36 (29, 43)       | 1.9 (1.2, 2.6)  | 11.8 (9.8, 14)    | 3.6 (3, 4.2)      |
| Male                      | 2077376  | 2312  | 10.3 (8.1, 12.6)  | 5.1 (3.8, 6.3) | 0.9 (0.5, 1.2) | 37 (27, 51)       | 293 (240, 348)    | 88 (74, 103)         | 21 (15, 30)       | 168 (136, 201)    | 50 (41, 59)       | 1.6 (1, 2.1)    | 12.7 (10.4, 15)   | 3.8 (3.2, 4.4)    |
| All                       | 4188101  | 4072  | 10.5 (8.9, 12.1)  | 5.1 (4.2, 6)   | 0.9 (0.6, 1.1) | 70 (54, 90)       | 502 (431, 573)    | 151 (134, 171)       | 20 (15, 27)       | 143 (121, 165)    | 43 (37, 48)       | 1.7 (1.3, 2.1)  | 12.3 (10.8, 13.9) | 3.7 (3.3, 4.1)    |
| <b>Egypt</b>              |          |       |                   |                |                |                   |                   |                      |                   |                   |                   |                 |                   |                   |
| Age 25-69                 | 21603924 | 23536 | 10.3 (9.5, 11)    | 4.6 (4.3, 4.9) | 5.5 (5.2, 5.8) | 415 (314, 538)    | 3823 (3240, 4433) | 10867 (9670, 12101)  | 20 (15, 26)       | 186 (156, 215)    | 528 (470, 586)    | 1.8 (1.3, 2.2)  | 16.2 (14.2, 18.2) | 46.1 (43.2, 49.2) |
| Age 70+                   | 1181854  | 23006 | 10.2 (8.9, 11.5)  | 4.4 (3.8, 5.1) | 5.1 (4.6, 5.6) | 282 (192, 405)    | 2635 (2090, 3207) | 7466 (6386, 8617)    | 253 (173, 363)    | 2336 (1855, 2850) | 6619 (5681, 7661) | 1.2 (0.7, 1.7)  | 11.5 (9, 13.9)    | 32.4 (27.7, 36.7) |
| Female                    | 11567853 | 20556 | 10.4 (8.1, 12.7)  | 4.6 (3.4, 5.8) | 5.6 (4.6, 6.6) | 337 (242, 457)    | 2743 (2235, 3293) | 7919 (6939, 8961)    | 34 (24, 48)       | 277 (221, 335)    | 799 (696, 907)    | 1.6 (1.1, 2.2)  | 13.3 (10.9, 15.6) | 38.7 (35.4, 41.9) |
| Male                      | 11217925 | 25982 | 10.1 (7.9, 12.3)  | 4.6 (3.4, 5.7) | 5.4 (4.4, 6.4) | 360 (261, 477)    | 3715 (3040, 4369) | 10414 (9194, 11611)  | 36 (26, 48)       | 368 (299, 435)    | 1031 (909, 1151)  | 1.4 (0.9, 1.9)  | 14.3 (11.8, 16.9) | 39.9 (36.3, 43.6) |
| All                       | 22785778 | 46536 | 10.3 (8.7, 11.9)  | 4.6 (3.8, 5.4) | 5.5 (4.8, 6.2) | 697 (559, 863)    | 6458 (5616, 7310) | 18333 (16692, 20090) | 35 (28, 43)       | 322 (280, 365)    | 914 (831, 1000)   | 1.5 (1.1, 1.9)  | 13.9 (12.1, 15.6) | 39.4 (37, 41.7)   |
| <b>El Salvador</b>        |          |       |                   |                |                |                   |                   |                      |                   |                   |                   |                 |                   |                   |

|                                       |          |       |                   |                |                |                |                   |                |                   |                   |                   |                   |                   |                 |
|---------------------------------------|----------|-------|-------------------|----------------|----------------|----------------|-------------------|----------------|-------------------|-------------------|-------------------|-------------------|-------------------|-----------------|
| Age 25-69                             | 1875182  | 1166  | 7.3 (6.8, 7.9)    | 3.2 (2.9, 3.5) | 1.2 (1, 1.4)   | 15 (11, 19)    | 226 (194, 257)    | 104 (80, 129)  | 8 (6, 10)         | 123 (105, 140)    | 56 (43, 70)       | 1.3 (0.9, 1.6)    | 19.4 (17, 21.8)   | 8.9 (6.7, 10.9) |
| Age 70+                               | 158999   | 2264  | 7.3 (6.4, 8.1)    | 3.1 (2.6, 3.5) | 1.1 (0.8, 1.4) | 17 (11, 27)    | 288 (215, 356)    | 115 (69, 168)  | 114 (68, 181)     | 1886 (1410, 2350) | 752 (435, 1115)   | 0.8 (0.4, 1.1)    | 12.7 (10.1, 15.4) | 5.1 (3.1, 7.1)  |
| Female                                | 1093090  | 1637  | 7.4 (5.8, 9.1)    | 3.3 (2.4, 4.2) | 1.2 (0.8, 1.6) | 15 (9, 23)     | 235 (180, 289)    | 101 (62, 142)  | 16 (10, 26)       | 261 (195, 326)    | 111 (66, 160)     | 0.9 (0.6, 1.2)    | 14.4 (11.9, 16.8) | 6.2 (4.3, 8.2)  |
| Male                                  | 941091   | 1793  | 7.2 (5.6, 8.9)    | 3.1 (2.3, 4)   | 1.2 (0.8, 1.6) | 17 (12, 24)    | 279 (229, 332)    | 118 (81, 160)  | 22 (15, 33)       | 354 (278, 432)    | 148 (95, 210)     | 1 (0.6, 1.3)      | 15.5 (13.1, 18.1) | 6.6 (4.5, 8.7)  |
| All                                   | 2034181  | 3427  | 7.3 (6.2, 8.5)    | 3.2 (2.6, 3.8) | 1.2 (0.9, 1.5) | 32 (24, 44)    | 514 (437, 592)    | 219 (166, 279) | 19 (14, 26)       | 302 (250, 353)    | 127 (91, 166)     | 0.9 (0.7, 1.2)    | 15 (13.3, 16.7)   | 6.4 (5, 7.8)    |
| <b>Equatorial Guinea</b>              |          |       |                   |                |                |                |                   |                |                   |                   |                   |                   |                   |                 |
| Age 25-69                             | 151630   | 134   | 11.1 (10.1, 12.1) | 4.2 (3.8, 4.5) | 1 (0.8, 1.2)   | 4 (2, 5)       | 23 (16, 31)       | 8 (5, 13)      | 27 (17, 39)       | 164 (111, 223)    | 62 (36, 95)       | 2.8 (2.2, 3.4)    | 17 (14.9, 19.1)   | 6.3 (4.6, 8)    |
| Age 70+                               | 9832     | 113   | 11 (9.6, 12.4)    | 4 (3.5, 4.5)   | 0.9 (0.7, 1.2) | 2 (1, 3)       | 14 (10, 19)       | 5 (2, 7)       | 240 (154, 349)    | 1453 (1024, 1957) | 474 (255, 734)    | 2 (1.3, 2.7)      | 12.2 (9.4, 14.8)  | 4 (2.3, 5.7)    |
| Female                                | 77236    | 99    | 11.2 (8.8, 13.7)  | 4.2 (3.1, 5.3) | 1 (0.6, 1.4)   | 2 (2, 4)       | 14 (10, 18)       | 5 (3, 7)       | 27 (18, 38)       | 141 (104, 182)    | 51 (30, 73)       | 2.5 (1.8, 3.3)    | 13.8 (11.3, 16.3) | 4.8 (3.1, 6.5)  |
| Male                                  | 84226    | 149   | 10.9 (8.6, 13.3)  | 4.1 (3.1, 5.2) | 1 (0.6, 1.4)   | 4 (2, 5)       | 23 (15, 31)       | 8 (5, 12)      | 46 (27, 68)       | 293 (194, 409)    | 106 (59, 162)     | 2.3 (1.6, 3.1)    | 15.4 (12.7, 18.1) | 5.5 (3.4, 7.4)  |
| All                                   | 161462   | 249   | 11.1 (9.4, 12.8)  | 4.2 (3.4, 4.9) | 1 (0.7, 1.3)   | 6 (4, 8)       | 37 (28, 46)       | 13 (9, 18)     | 37 (26, 49)       | 221 (165, 286)    | 80 (53, 112)      | 2.4 (1.9, 3)      | 14.7 (12.8, 16.5) | 5.2 (3.9, 6.6)  |
| <b>Eritrea</b>                        |          |       |                   |                |                |                |                   |                |                   |                   |                   |                   |                   |                 |
| Age 25-69                             | 1011479  | 700   | 6.6 (6.1, 7.1)    | 4.7 (4.3, 5.1) | 0.6 (0.5, 0.7) | 12 (9, 16)     | 117 (95, 139)     | 17 (11, 24)    | 9 (7, 13)         | 93 (77, 111)      | 14 (9, 19)        | 1.7 (1.2, 2.2)    | 16.7 (14.4, 19)   | 2.4 (1.6, 3.3)  |
| Age 70+                               | 45895    | 413   | 6.6 (5.7, 7.5)    | 4.6 (3.9, 5.3) | 0.6 (0.4, 0.7) | 4 (3, 7)       | 47 (34, 61)       | 6 (3, 9)       | 95 (56, 150)      | 1001 (722, 1324)  | 123 (60, 204)     | 1.1 (0.5, 1.6)    | 11.3 (8.2, 14.1)  | 1.4 (0.6, 2.1)  |
| Female                                | 564065   | 508   | 6.6 (5.1, 8.1)    | 4.8 (3.6, 6)   | 0.6 (0.3, 0.9) | 7 (5, 10)      | 71 (54, 89)       | 10 (6, 15)     | 11 (7, 16)        | 109 (84, 138)     | 16 (9, 24)        | 1.4 (0.8, 1.9)    | 13.9 (11.2, 16.6) | 2 (1.1, 2.9)    |
| Male                                  | 493309   | 605   | 6.6 (5.1, 8)      | 4.7 (3.5, 5.9) | 0.6 (0.3, 0.9) | 9 (6, 13)      | 93 (75, 113)      | 13 (8, 18)     | 14 (10, 20)       | 141 (114, 172)    | 20 (12, 28)       | 1.5 (0.9, 2.2)    | 15.3 (12, 18.7)   | 2.1 (1.1, 3.1)  |
| All                                   | 1057374  | 1116  | 6.6 (5.5, 7.7)    | 4.7 (3.9, 5.6) | 0.6 (0.4, 0.8) | 16 (13, 21)    | 163 (137, 190)    | 23 (16, 30)    | 12 (10, 16)       | 124 (105, 144)    | 18 (12, 23)       | 1.5 (1, 1.9)      | 14.6 (12.6, 16.8) | 2 (1.3, 2.7)    |
| <b>Estonia</b>                        |          |       |                   |                |                |                |                   |                |                   |                   |                   |                   |                   |                 |
| Age 25-69                             | 886384   | 1913  | 14.4 (14.1, 14.7) | 5 (4.9, 5.1)   | 1.1 (1, 1.1)   | 175 (146, 205) | 287 (239, 334)    | 130 (111, 149) | 207 (172, 243)    | 340 (284, 396)    | 154 (132, 178)    | 9.2 (8, 10.2)     | 15 (13.3, 16.7)   | 6.8 (6.1, 7.4)  |
| Age 70+                               | 118147   | 5350  | 14.4 (13.8, 15.1) | 4.8 (4.6, 5)   | 1 (0.9, 1.1)   | 353 (257, 452) | 553 (410, 691)    | 222 (174, 271) | 2956 (2166, 3796) | 4650 (3468, 5823) | 1863 (1467, 2283) | 6.6 (5.1, 8.2)    | 10.3 (8.2, 12.5)  | 4.1 (3.4, 5)    |
| Female                                | 560025   | 4187  | 14.6 (11.4, 17.7) | 5 (3.7, 6.3)   | 1.1 (0.7, 1.5) | 295 (204, 390) | 451 (316, 589)    | 187 (143, 235) | 710 (473, 952)    | 1082 (732, 1435)  | 445 (334, 566)    | 7.1 (6, 8.1)      | 10.8 (9.3, 12.3)  | 4.5 (3.9, 5.1)  |
| Male                                  | 444506   | 3072  | 14.2 (11.2, 17.3) | 4.9 (3.7, 6.1) | 1.1 (0.7, 1.4) | 232 (190, 275) | 389 (320, 456)    | 165 (141, 190) | 669 (541, 805)    | 1122 (912, 1343)  | 468 (399, 543)    | 7.6 (6.4, 8.9)    | 12.7 (10.8, 14.6) | 5.4 (4.6, 6.1)  |
| All                                   | 1004531  | 7250  | 14.4 (12.2, 16.6) | 5 (4.1, 5.9)   | 1.1 (0.8, 1.3) | 528 (430, 627) | 840 (693, 989)    | 352 (300, 405) | 692 (552, 835)    | 1100 (886, 1316)  | 455 (381, 527)    | 7.3 (6.5, 8.1)    | 11.6 (10.4, 12.8) | 4.8 (4.4, 5.3)  |
| <b>Ethiopia</b>                       |          |       |                   |                |                |                |                   |                |                   |                   |                   |                   |                   |                 |
| Age 25-69                             | 16601953 | 7026  | 8.4 (7.7, 9)      | 3.4 (3, 3.7)   | 0.6 (0.5, 0.7) | 93 (69, 124)   | 1358 (1108, 1628) | 173 (112, 244) | 6 (4, 8)          | 82 (67, 98)       | 10 (7, 15)        | 1.3 (1, 1.7)      | 19.3 (17, 21.9)   | 2.5 (1.7, 3.2)  |
| Age 70+                               | 763086   | 3440  | 8.3 (7.2, 9.4)    | 3.2 (2.8, 3.7) | 0.6 (0.4, 0.7) | 29 (18, 45)    | 463 (338, 601)    | 49 (24, 83)    | 39 (25, 59)       | 616 (453, 806)    | 65 (33, 108)      | 0.9 (0.5, 1.2)    | 13.5 (10.5, 16.7) | 1.4 (0.6, 2.2)  |
| Female                                | 8877136  | 3810  | 8.5 (6.6, 10.4)   | 3.4 (2.4, 4.3) | 0.6 (0.3, 0.9) | 43 (30, 59)    | 636 (513, 778)    | 81 (51, 118)   | 5 (4, 7)          | 76 (61, 93)       | 10 (6, 14)        | 1.1 (0.8, 1.5)    | 16.7 (13.6, 19.5) | 2.1 (1.2, 3.1)  |
| Male                                  | 8487903  | 6653  | 8.3 (6.4, 10.1)   | 3.3 (2.4, 4.2) | 0.6 (0.3, 0.9) | 80 (56, 110)   | 1185 (925, 1441)  | 141 (84, 211)  | 10 (7, 13)        | 144 (113, 174)    | 17 (10, 25)       | 1.2 (0.8, 1.6)    | 17.8 (14.7, 21)   | 2.1 (1.1, 3.1)  |
| All                                   | 17365039 | 10518 | 8.4 (7.1, 9.7)    | 3.4 (2.7, 4)   | 0.6 (0.4, 0.8) | 123 (95, 156)  | 1822 (1539, 2105) | 222 (158, 298) | 7 (6, 9)          | 109 (93, 126)     | 13 (9, 18)        | 1.2 (0.9, 1.5)    | 17.3 (15.1, 19.4) | 2.1 (1.4, 2.8)  |
| <b>Federated States of Micronesia</b> |          |       |                   |                |                |                |                   |                |                   |                   |                   |                   |                   |                 |
| Age 25-69                             | 31805    | 33    | 23 (21.1, 24.8)   | 2.9 (2.7, 3.1) | 1.1 (0.9, 1.3) | 7 (5, 9)       | 7 (5, 9)          | 3 (2, 4)       | 245 (162, 336)    | 245 (162, 336)    | 95 (58, 141)      | 20.8 (18.3, 23.3) | 20.7 (18.3, 23.4) | 8 (5.9, 10.3)   |
| Age 70+                               | 2091     | 16    | 22.9 (20, 25.7)   | 2.8 (2.4, 3.1) | 1 (0.7, 1.4)   | 2 (1, 3)       | 2 (1, 3)          | 1 (0, 1)       | 1109 (620, 1674)  | 1109 (620, 1674)  | 367 (163, 624)    | 13.8 (11.1, 16.6) | 13.9 (11, 16.8)   | 4.6 (2.6, 6.6)  |
| Female                                | 16885    | 16    | 23.3 (18.4, 28.2) | 2.9 (2.1, 3.7) | 1.1 (0.7, 1.5) | 3 (2, 4)       | 3 (2, 4)          | 1 (1, 2)       | 182 (120, 250)    | 182 (120, 250)    | 65 (40, 97)       | 17.1 (14.3, 20.1) | 17.3 (14.3, 20.3) | 6.3 (4, 8.5)    |
| Male                                  | 17011    | 33    | 22.8 (18, 27.7)   | 2.8 (2, 3.6)   | 1.1 (0.7, 1.5) | 6 (4, 9)       | 6 (4, 9)          | 2 (1, 4)       | 412 (256, 582)    | 412 (256, 582)    | 158 (86, 248)     | 19 (15.9, 22.2)   | 18.9 (15.8, 22)   | 7.3 (4.5, 10)   |
| All                                   | 33896    | 50    | 23.1 (19.6, 26.5) | 2.9 (2.3, 3.5) | 1.1 (0.8, 1.4) | 9 (7, 12)      | 9 (7, 12)         | 3 (2, 5)       | 296 (217, 383)    | 296 (217, 383)    | 111 (73, 158)     | 18.4 (16.2, 20.6) | 18.5 (16.3, 20.6) | 7 (5.2, 8.7)    |
| <b>Fiji</b>                           |          |       |                   |                |                |                |                   |                |                   |                   |                   |                   |                   |                 |
| Age 25-69                             | 297029   | 545   | 23.7 (21.7, 25.9) | 5 (4.5, 5.4)   | 0.8 (0.7, 0.9) | 91 (72, 108)   | 91 (72, 108)      | 24 (17, 33)    | 375 (298, 453)    | 375 (298, 453)    | 100 (67, 136)     | 16.6 (14.5, 18.8) | 16.6 (14.5, 18.8) | 4.5 (3.3, 5.6)  |
| Age 70+                               | 12418    | 173   | 23.5 (20.4, 26.7) | 4.8 (4.1, 5.5) | 0.7 (0.5, 0.9) | 19 (14, 25)    | 19 (14, 25)       | 4 (2, 7)       | 1508 (1083, 1950) | 1508 (1083, 1950) | 341 (192, 526)    | 11.1 (8.4, 13.8)  | 11.1 (8.5, 14)    | 2.5 (1.2, 3.7)  |



|                |          |        |                   |                |                |                      |                      |                      |                   |                   |                   |                   |                   |                |
|----------------|----------|--------|-------------------|----------------|----------------|----------------------|----------------------|----------------------|-------------------|-------------------|-------------------|-------------------|-------------------|----------------|
| Female         | 153925   | 156    | 23.9 (18.8, 29)   | 5 (3.7, 6.3)   | 0.8 (0.4, 1.2) | 22 (17, 27)          | 22 (17, 27)          | 6 (4, 8)             | 181 (141, 225)    | 181 (141, 225)    | 48 (31, 67)       | 13.9 (11.3, 16.4) | 13.8 (11.5, 16.1) | 3.7 (2.4, 4.9) |
| Male           | 155522   | 563    | 23.5 (18.5, 28.5) | 5 (3.7, 6.2)   | 0.8 (0.4, 1.1) | 88 (69, 106)         | 88 (69, 106)         | 23 (15, 31)          | 675 (530, 814)    | 675 (530, 814)    | 175 (111, 244)    | 15.7 (12.9, 18.5) | 15.7 (12.8, 18.7) | 4.1 (2.6, 5.6) |
| All            | 309447   | 717    | 23.7 (20.2, 27.3) | 5 (4.1, 5.9)   | 0.8 (0.5, 1)   | 110 (91, 128)        | 110 (91, 128)        | 29 (21, 38)          | 431 (354, 504)    | 431 (354, 504)    | 112 (80, 148)     | 15.3 (13.4, 17.3) | 15.3 (13.3, 17.2) | 4 (3, 5)       |
| <b>Finland</b> |          |        |                   |                |                |                      |                      |                      |                   |                   |                   |                   |                   |                |
| Age 25-69      | 2926796  | 4482   | 14.2 (14, 14.5)   | 3.5 (3.4, 3.7) | 0.8 (0.8, 0.9) | 384 (314, 456)       | 782 (640, 912)       | 190 (163, 221)       | 170 (135, 203)    | 347 (279, 410)    | 84 (71, 98)       | 8.6 (7.5, 9.6)    | 17.4 (15.5, 19.5) | 4.2 (3.9, 4.6) |
| Age 70+        | 445804   | 10814  | 14.2 (13.7, 14.6) | 3.4 (3.1, 3.6) | 0.8 (0.7, 0.8) | 678 (514, 845)       | 1343 (1030, 1645)    | 278 (230, 330)       | 1666 (1241, 2099) | 3308 (2520, 4081) | 680 (555, 811)    | 6.3 (4.8, 7.7)    | 12.4 (9.8, 14.8)  | 2.6 (2.1, 3)   |
| Female         | 1777506  | 7269   | 14.4 (11.3, 17.5) | 3.5 (2.6, 4.5) | 0.8 (0.5, 1.2) | 486 (340, 638)       | 930 (677, 1194)      | 202 (159, 249)       | 355 (241, 473)    | 677 (470, 889)    | 146 (111, 184)    | 6.7 (5.7, 7.7)    | 12.8 (11, 14.6)   | 2.8 (2.4, 3.1) |
| Male           | 1595094  | 8009   | 14.1 (11, 17.1)   | 3.5 (2.5, 4.4) | 0.8 (0.5, 1.2) | 576 (467, 688)       | 1195 (982, 1417)     | 266 (229, 308)       | 505 (402, 611)    | 1051 (847, 1257)  | 231 (197, 268)    | 7.2 (6.1, 8.4)    | 14.9 (12.7, 17.1) | 3.3 (2.9, 3.7) |
| All            | 3372600  | 15275  | 14.2 (12.1, 16.4) | 3.5 (2.8, 4.2) | 0.8 (0.6, 1.1) | 1062 (878, 1252)     | 2125 (1770, 2471)    | 468 (409, 528)       | 428 (346, 509)    | 857 (702, 1008)   | 187 (162, 211)    | 7 (6.1, 7.7)      | 13.9 (12.5, 15.2) | 3.1 (2.8, 3.3) |
| <b>France</b>  |          |        |                   |                |                |                      |                      |                      |                   |                   |                   |                   |                   |                |
| Age 25-69      | 31524932 | 17311  | 14 (13.8, 14.3)   | 5.4 (5, 5.8)   | 1.1 (1, 1.1)   | 1444 (1120, 1803)    | 2460 (1972, 2987)    | 1140 (961, 1332)     | 49 (38, 61)       | 84 (67, 102)      | 39 (33, 45)       | 8.4 (7.2, 9.5)    | 14.2 (12.4, 16)   | 6.6 (5.9, 7.2) |
| Age 70+        | 5255376  | 65190  | 14 (13.5, 14.4)   | 5.2 (4.5, 5.8) | 1 (0.9, 1.1)   | 3834 (2599, 5163)    | 6376 (4563, 8243)    | 2550 (2001, 3201)    | 750 (516, 1012)   | 1250 (902, 1623)  | 499 (389, 627)    | 5.9 (4.4, 7.3)    | 9.8 (7.7, 11.8)   | 3.9 (3.2, 4.6) |
| Female         | 19343050 | 41663  | 14.2 (11.1, 17.2) | 5.4 (4.1, 6.7) | 1.1 (0.7, 1.5) | 2600 (1594, 3773)    | 4149 (2668, 5697)    | 1738 (1278, 2323)    | 163 (98, 242)     | 260 (163, 363)    | 108 (78, 147)     | 6.3 (5.1, 7.4)    | 10 (8.4, 11.6)    | 4.2 (3.6, 4.7) |
| Male           | 17437258 | 40788  | 13.9 (10.9, 16.9) | 5.3 (3.9, 6.6) | 1 (0.7, 1.4)   | 2677 (1984, 3381)    | 4688 (3613, 5772)    | 1952 (1632, 2308)    | 193 (139, 252)    | 339 (256, 425)    | 139 (115, 168)    | 6.5 (5.4, 7.7)    | 11.5 (9.7, 13.3)  | 4.8 (4.1, 5.4) |
| All            | 36780308 | 82412  | 14 (11.9, 16.2)   | 5.3 (4.4, 6.3) | 1.1 (0.8, 1.3) | 5278 (3964, 6638)    | 8836 (6892, 10794)   | 3690 (3098, 4383)    | 177 (131, 225)    | 297 (225, 366)    | 123 (102, 147)    | 6.4 (5.6, 7.2)    | 10.7 (9.5, 11.9)  | 4.5 (4.1, 4.9) |
| <b>Gabon</b>   |          |        |                   |                |                |                      |                      |                      |                   |                   |                   |                   |                   |                |
| Age 25-69      | 349813   | 286    | 10.5 (9.7, 11.3)  | 2.8 (2.5, 3.1) | 0.8 (0.6, 0.9) | 4 (3, 6)             | 56 (45, 68)          | 12 (8, 17)           | 12 (9, 16)        | 149 (120, 180)    | 31 (20, 44)       | 1.5 (1.2, 1.9)    | 19.7 (17.3, 22)   | 4.1 (2.8, 5.4) |
| Age 70+        | 32331    | 347    | 10.4 (8.9, 11.7)  | 2.7 (2.3, 3.2) | 0.7 (0.5, 1)   | 4 (2, 6)             | 48 (35, 61)          | 9 (4, 14)            | 129 (80, 195)     | 1544 (1142, 2001) | 279 (146, 451)    | 1.1 (0.6, 1.6)    | 13.7 (10.8, 16.5) | 2.5 (1.3, 3.8) |
| Female         | 194958   | 249    | 10.6 (8.2, 12.9)  | 2.8 (2, 3.7)   | 0.8 (0.4, 1.2) | 4 (2, 5)             | 38 (29, 49)          | 8 (4, 12)            | 16 (10, 23)       | 164 (123, 210)    | 33 (19, 51)       | 1.4 (1, 1.9)      | 15.4 (12.8, 17.9) | 3.1 (1.7, 4.5) |
| Male           | 187186   | 383    | 10.3 (8.1, 12.6)  | 2.8 (2, 3.6)   | 0.8 (0.4, 1.1) | 5 (3, 7)             | 65 (52, 80)          | 13 (8, 18)           | 23 (16, 31)       | 312 (247, 379)    | 61 (38, 87)       | 1.2 (0.8, 1.7)    | 17.1 (14.4, 20.1) | 3.3 (1.9, 4.8) |
| All            | 382144   | 632    | 10.4 (8.8, 12.1)  | 2.8 (2.2, 3.4) | 0.8 (0.5, 1)   | 8 (6, 11)            | 104 (87, 122)        | 20 (14, 27)          | 19 (15, 25)       | 238 (199, 277)    | 47 (32, 63)       | 1.3 (1, 1.6)      | 16.4 (14.6, 18.3) | 3.2 (2.3, 4.2) |
| <b>Georgia</b> |          |        |                   |                |                |                      |                      |                      |                   |                   |                   |                   |                   |                |
| Age 25-69      | 2978984  | 7202   | 8 (7.4, 8.6)      | 4.5 (4.2, 4.9) | 0.9 (0.9, 1)   | 110 (80, 149)        | 1171 (987, 1367)     | 389 (332, 453)       | 37 (27, 50)       | 393 (333, 454)    | 131 (113, 151)    | 1.5 (1.1, 1.9)    | 16.3 (14.5, 18.1) | 5.4 (4.8, 6)   |
| Age 70+        | 320531   | 12166  | 8 (7, 9)          | 4.3 (3.8, 4.9) | 0.9 (0.8, 0.9) | 118 (73, 179)        | 1353 (1028, 1675)    | 386 (303, 480)       | 367 (226, 548)    | 4203 (3236, 5181) | 1200 (952, 1494)  | 1 (0.6, 1.4)      | 11.1 (8.7, 13.8)  | 3.2 (2.5, 3.9) |
| Female         | 1807908  | 9487   | 8 (6.2, 9.8)      | 4.5 (3.3, 5.7) | 0.9 (0.6, 1.3) | 103 (64, 162)        | 1149 (843, 1432)     | 352 (276, 434)       | 75 (43, 125)      | 841 (595, 1073)   | 254 (194, 324)    | 1.1 (0.8, 1.4)    | 12.1 (10.3, 14)   | 3.7 (3.2, 4.2) |
| Male           | 1491607  | 9881   | 7.9 (6.2, 9.7)    | 4.5 (3.3, 5.6) | 0.9 (0.5, 1.3) | 125 (89, 173)        | 1375 (1134, 1623)    | 423 (353, 492)       | 110 (76, 158)     | 1223 (998, 1469)  | 367 (303, 432)    | 1.3 (0.9, 1.7)    | 13.9 (11.8, 16)   | 4.3 (3.6, 5)   |
| All            | 3299515  | 19366  | 8 (6.7, 9.3)      | 4.5 (3.7, 5.3) | 0.9 (0.7, 1.2) | 228 (174, 301)       | 2524 (2153, 2890)    | 775 (670, 883)       | 91 (66, 123)      | 1013 (844, 1179)  | 305 (259, 353)    | 1.2 (0.9, 1.4)    | 13 (11.7, 14.4)   | 4 (3.6, 4.4)   |
| <b>Germany</b> |          |        |                   |                |                |                      |                      |                      |                   |                   |                   |                   |                   |                |
| Age 25-69      | 47420285 | 57603  | 13.8 (13.6, 14.1) | 4.1 (3.9, 4.2) | 1.3 (1.2, 1.3) | 4525 (3660, 5397)    | 9511 (7774, 11174)   | 5042 (4351, 5774)    | 107 (86, 128)     | 227 (183, 267)    | 120 (103, 138)    | 7.9 (6.9, 8.8)    | 16.5 (14.7, 18.4) | 8.8 (7.9, 9.5) |
| Age 70+        | 7899642  | 198693 | 13.8 (13.4, 14.3) | 3.9 (3.6, 4.1) | 1.2 (1.1, 1.3) | 11292 (8399, 14230)  | 23063 (17253, 28412) | 10472 (8516, 12652)  | 1383 (1053, 1717) | 2850 (2203, 3463) | 1299 (1074, 1555) | 5.7 (4.4, 6.9)    | 11.6 (9.2, 14.1)  | 5.3 (4.4, 6.2) |
| Female         | 29420647 | 138103 | 14 (11, 17)       | 4 (3, 5.1)     | 1.3 (0.8, 1.7) | 8439 (5617, 11094)   | 16667 (11444, 21520) | 7758 (6125, 9726)    | 335 (221, 445)    | 662 (449, 862)    | 307 (239, 390)    | 6.1 (5.2, 7)      | 12.1 (10.5, 13.7) | 5.6 (5, 6.3)   |
| Male           | 25899280 | 118429 | 13.7 (10.7, 16.6) | 4 (3, 5)       | 1.3 (0.8, 1.7) | 7378 (5835, 8910)    | 15907 (12777, 19095) | 7756 (6660, 9003)    | 389 (305, 475)    | 843 (667, 1017)   | 406 (344, 476)    | 6.2 (5.2, 7.3)    | 13.4 (11.4, 15.5) | 6.5 (5.7, 7.4) |
| All            | 55319927 | 256376 | 13.8 (11.7, 15.9) | 4 (3.3, 4.8)   | 1.3 (1, 1.6)   | 15817 (12658, 18833) | 32574 (26483, 38377) | 15514 (13565, 17815) | 361 (293, 431)    | 749 (613, 879)    | 355 (310, 407)    | 6.2 (5.5, 6.9)    | 12.7 (11.4, 14)   | 6.1 (5.6, 6.5) |
| <b>Ghana</b>   |          |        |                   |                |                |                      |                      |                      |                   |                   |                   |                   |                   |                |
| Age 25-69      | 5079121  | 2006   | 12.5 (11.5, 13.5) | 3.1 (2.8, 3.3) | 0.8 (0.6, 0.9) | 113 (89, 138)        | 391 (319, 464)       | 84 (58, 114)         | 22 (18, 27)       | 77 (63, 92)       | 16 (12, 23)       | 5.6 (4.7, 6.5)    | 19.5 (17.2, 21.9) | 4.2 (3, 5.3)   |
| Age 70+        | 256866   | 1614   | 12.4 (10.8, 13.9) | 3 (2.6, 3.4)   | 0.7 (0.5, 0.9) | 63 (44, 84)          | 218 (161, 283)       | 40 (23, 64)          | 249 (175, 336)    | 863 (639, 1124)   | 159 (89, 248)     | 3.9 (2.8, 4.9)    | 13.5 (10.7, 16.4) | 2.5 (1.2, 3.7) |
| Female         | 2653969  | 2117   | 12.6 (9.9, 15.3)  | 3.1 (2.2, 4)   | 0.8 (0.4, 1.1) | 103 (79, 131)        | 346 (272, 425)       | 71 (44, 103)         | 41 (31, 52)       | 137 (107, 169)    | 28 (17, 40)       | 4.8 (3.8, 5.9)    | 16.3 (13.6, 19.1) | 3.3 (2.1, 4.5) |
| Male           | 2682018  | 1496   | 12.4 (9.7, 15.1)  | 3.1 (2.2, 3.9) | 0.8 (0.4, 1.1) | 73 (56, 91)          | 263 (210, 316)       | 53 (36, 72)          | 28 (22, 35)       | 103 (82, 124)     | 20 (14, 28)       | 4.9 (3.7, 6)      | 17.6 (14.4, 20.7) | 3.5 (2.1, 4.9) |

|                      |         |       |                   |                |                |                |                   |                 |                |                   |                |                |                   |                |
|----------------------|---------|-------|-------------------|----------------|----------------|----------------|-------------------|-----------------|----------------|-------------------|----------------|----------------|-------------------|----------------|
| All                  | 5335987 | 3608  | 12.5 (10.5, 14.4) | 3.1 (2.5, 3.7) | 0.8 (0.5, 1)   | 176 (146, 209) | 609 (518, 699)    | 124 (91, 161)   | 35 (29, 41)    | 120 (101, 137)    | 24 (18, 31)    | 4.9 (4.1, 5.6) | 16.9 (14.9, 18.9) | 3.4 (2.4, 4.3) |
| <b>Greece</b>        |         |       |                   |                |                |                |                   |                 |                |                   |                |                |                   |                |
| Age 25-69            | 5720554 | 5775  | 11.1 (10.7, 11.5) | 4.5 (4.2, 4.7) | 1 (1, 1.1)     | 158 (119, 202) | 921 (747, 1076)   | 367 (314, 426)  | 26 (20, 33)    | 152 (124, 177)    | 60 (52, 70)    | 2.7 (2.2, 3.2) | 16 (14.2, 17.8)   | 6.3 (5.7, 7)   |
| Age 70+              | 941293  | 15542 | 11.1 (10.4, 11.7) | 4.3 (3.9, 4.7) | 1 (0.9, 1)     | 305 (205, 425) | 1738 (1331, 2151) | 590 (478, 718)  | 332 (222, 469) | 1886 (1431, 2341) | 639 (513, 783) | 2 (1.3, 2.6)   | 11.2 (8.8, 13.6)  | 3.8 (3.1, 4.4) |
| Female               | 3447297 | 9464  | 11.2 (8.8, 13.7)  | 4.5 (3.3, 5.6) | 1 (0.6, 1.4)   | 210 (134, 307) | 1118 (802, 1442)  | 394 (305, 494)  | 78 (48, 118)   | 416 (286, 549)    | 145 (109, 186) | 2.2 (1.7, 2.7) | 11.8 (10.1, 13.6) | 4.2 (3.6, 4.7) |
| Male                 | 3214550 | 11845 | 11 (8.6, 13.4)    | 4.4 (3.3, 5.6) | 1 (0.6, 1.4)   | 253 (186, 337) | 1541 (1234, 1847) | 563 (474, 658)  | 89 (63, 120)   | 539 (421, 654)    | 194 (161, 230) | 2.1 (1.6, 2.6) | 13 (11, 15)       | 4.7 (4.1, 5.4) |
| All                  | 6661847 | 21344 | 11.1 (9.4, 12.8)  | 4.5 (3.7, 5.3) | 1 (0.8, 1.3)   | 463 (360, 591) | 2659 (2212, 3099) | 957 (825, 1091) | 83 (63, 110)   | 476 (389, 567)    | 169 (144, 196) | 2.2 (1.8, 2.5) | 12.5 (11.1, 13.7) | 4.5 (4.1, 4.9) |
| <b>Grenada</b>       |         |       |                   |                |                |                |                   |                 |                |                   |                |                |                   |                |
| Age 25-69            | 36308   | 42    | 9.4 (8.6, 10.1)   | 3.4 (3.1, 3.6) | 0.5 (0.4, 0.6) | 1 (0, 1)       | 7 (6, 9)          | 1 (0, 1)        | 11 (9, 15)     | 168 (142, 194)    | 12 (8, 18)     | 1.2 (0.9, 1.5) | 17.9 (15.6, 20.2) | 1.3 (0.8, 1.7) |
| Age 70+              | 4910    | 77    | 9.3 (8.1, 10.7)   | 3.3 (2.8, 3.7) | 0.4 (0.3, 0.6) | 1 (0, 1)       | 10 (8, 13)        | 1 (0, 1)        | 147 (93, 222)  | 2327 (1758, 2909) | 138 (63, 239)  | 0.8 (0.5, 1.2) | 13.1 (10.3, 15.9) | 0.8 (0.3, 1.3) |
| Female               | 21662   | 62    | 9.5 (7.4, 11.6)   | 3.4 (2.5, 4.3) | 0.5 (0.2, 0.8) | 1 (0, 1)       | 9 (7, 11)         | 1 (0, 1)        | 26 (16, 39)    | 394 (296, 495)    | 25 (12, 45)    | 0.9 (0.6, 1.2) | 14.2 (11.9, 16.5) | 0.9 (0.5, 1.4) |
| Male                 | 19556   | 57    | 9.2 (7.2, 11.3)   | 3.3 (2.4, 4.2) | 0.5 (0.2, 0.8) | 1 (0, 1)       | 9 (7, 10)         | 1 (0, 1)        | 25 (18, 34)    | 389 (321, 459)    | 25 (14, 39)    | 1 (0.7, 1.3)   | 15.4 (12.8, 18.1) | 1 (0.5, 1.5)   |
| All                  | 41218   | 119   | 9.4 (7.9, 10.8)   | 3.4 (2.7, 4)   | 0.5 (0.3, 0.7) | 1 (1, 1)       | 18 (15, 20)       | 1 (1, 2)        | 25 (19, 34)    | 392 (329, 456)    | 25 (16, 36)    | 1 (0.7, 1.2)   | 14.8 (12.9, 16.5) | 1 (0.6, 1.3)   |
| <b>Guatemala</b>     |         |       |                   |                |                |                |                   |                 |                |                   |                |                |                   |                |
| Age 25-69            | 2975105 | 1289  | 5.7 (5.2, 6.1)    | 5 (4.6, 5.4)   | 0.8 (0.8, 0.9) | 22 (17, 29)    | 207 (176, 239)    | 57 (49, 66)     | 7 (5, 9)       | 66 (57, 76)       | 18 (16, 21)    | 1.7 (1.3, 2.2) | 16 (13.9, 18.1)   | 4.4 (3.8, 5)   |
| Age 70+              | 178286  | 1837  | 5.6 (5, 6.3)      | 4.8 (4.1, 5.4) | 0.7 (0.7, 0.8) | 19 (12, 29)    | 194 (150, 240)    | 46 (35, 59)     | 110 (69, 173)  | 1134 (868, 1414)  | 267 (203, 342) | 1 (0.5, 1.5)   | 10.6 (8.2, 12.9)  | 2.5 (1.9, 3.1) |
| Female               | 1588201 | 1564  | 5.8 (4.4, 7.1)    | 5 (3.8, 6.3)   | 0.8 (0.5, 1.2) | 20 (14, 29)    | 194 (152, 235)    | 51 (41, 62)     | 14 (9, 21)     | 139 (105, 172)    | 36 (29, 45)    | 1.3 (0.8, 1.8) | 12.4 (10.1, 14.7) | 3.3 (2.6, 3.9) |
| Male                 | 1565190 | 1559  | 5.6 (4.3, 6.9)    | 4.9 (3.7, 6.1) | 0.8 (0.4, 1.1) | 21 (15, 30)    | 207 (171, 246)    | 52 (42, 62)     | 15 (11, 22)    | 151 (122, 183)    | 37 (30, 45)    | 1.4 (0.8, 1.9) | 13.3 (10.7, 15.6) | 3.3 (2.7, 4)   |
| All                  | 3153391 | 3121  | 5.7 (4.7, 6.6)    | 5 (4.1, 5.8)   | 0.8 (0.6, 1.1) | 41 (32, 53)    | 401 (345, 456)    | 103 (89, 118)   | 15 (11, 20)    | 145 (122, 167)    | 37 (31, 43)    | 1.3 (0.9, 1.7) | 12.8 (11.2, 14.6) | 3.3 (2.8, 3.8) |
| <b>Guinea</b>        |         |       |                   |                |                |                |                   |                 |                |                   |                |                |                   |                |
| Age 25-69            | 2031260 | 896   | 12.6 (11.6, 13.6) | 4.4 (4, 4.8)   | 0.8 (0.6, 0.9) | 53 (41, 65)    | 150 (123, 181)    | 35 (24, 48)     | 25 (19, 30)    | 70 (57, 84)       | 16 (11, 22)    | 5.9 (4.8, 6.9) | 16.8 (14.4, 19)   | 3.9 (2.7, 5)   |
| Age 70+              | 102976  | 654   | 12.5 (11, 13.9)   | 4.3 (3.6, 4.9) | 0.7 (0.5, 0.9) | 27 (18, 38)    | 78 (55, 102)      | 15 (8, 25)      | 275 (180, 384) | 784 (557, 1024)   | 155 (79, 245)  | 4.1 (2.9, 5.5) | 11.9 (9.1, 14.6)  | 2.4 (1.1, 3.5) |
| Female               | 1081158 | 959   | 12.7 (9.9, 15.5)  | 4.5 (3.3, 5.6) | 0.8 (0.4, 1.1) | 51 (38, 65)    | 138 (109, 169)    | 31 (19, 46)     | 48 (36, 61)    | 129 (101, 158)    | 29 (17, 43)    | 5.3 (4, 6.5)   | 14.3 (11.5, 17)   | 3.2 (1.9, 4.4) |
| Male                 | 1053078 | 591   | 12.4 (9.7, 15.1)  | 4.3 (3.2, 5.4) | 0.7 (0.4, 1.1) | 29 (22, 37)    | 90 (72, 110)      | 19 (12, 28)     | 28 (21, 35)    | 84 (68, 102)      | 18 (12, 26)    | 5 (3.7, 6.3)   | 15.3 (12.4, 18.2) | 3.3 (1.8, 4.7) |
| All                  | 2134236 | 1548  | 12.6 (10.6, 14.5) | 4.4 (3.6, 5.2) | 0.7 (0.5, 1)   | 80 (66, 96)    | 228 (194, 265)    | 50 (36, 67)     | 38 (31, 45)    | 107 (91, 124)     | 23 (17, 31)    | 5.2 (4.2, 6)   | 14.7 (12.8, 16.6) | 3.2 (2.3, 4.1) |
| <b>Guinea-Bissau</b> |         |       |                   |                |                |                |                   |                 |                |                   |                |                |                   |                |
| Age 25-69            | 366571  | 174   | 12.3 (11.3, 13.2) | 4.9 (4.5, 5.3) | 0.8 (0.6, 0.9) | 9 (7, 12)      | 28 (21, 35)       | 7 (5, 10)       | 25 (19, 33)    | 74 (57, 93)       | 20 (13, 28)    | 5.4 (4.3, 6.4) | 16 (14, 18.2)     | 4.3 (3, 5.6)   |
| Age 70+              | 19817   | 127   | 12.2 (10.5, 13.8) | 4.7 (4.1, 5.4) | 0.7 (0.5, 1)   | 5 (3, 7)       | 14 (10, 20)       | 3 (2, 6)        | 250 (161, 359) | 740 (502, 1000)   | 167 (84, 280)  | 3.8 (2.5, 5)   | 11.3 (8.6, 13.7)  | 2.5 (1.2, 4)   |
| Female               | 198577  | 172   | 12.4 (9.7, 15.2)  | 5 (3.7, 6.2)   | 0.8 (0.4, 1.1) | 9 (6, 11)      | 24 (17, 31)       | 6 (4, 9)        | 42 (29, 56)    | 115 (84, 149)     | 29 (17, 43)    | 4.9 (3.7, 6.2) | 13.7 (11.2, 16)   | 3.5 (1.9, 4.9) |
| Male                 | 187811  | 129   | 12.1 (9.5, 14.7)  | 4.8 (3.6, 6)   | 0.8 (0.4, 1.1) | 6 (4, 8)       | 19 (14, 24)       | 5 (3, 7)        | 30 (21, 40)    | 96 (71, 122)      | 24 (15, 36)    | 4.5 (3.2, 5.7) | 14.4 (11.6, 17.3) | 3.7 (2.1, 5.1) |
| All                  | 386388  | 302   | 12.3 (10.4, 14.2) | 4.9 (4, 5.8)   | 0.8 (0.5, 1)   | 14 (11, 18)    | 42 (34, 50)       | 11 (8, 14)      | 36 (28, 44)    | 106 (86, 126)     | 27 (19, 36)    | 4.7 (3.8, 5.6) | 14 (12, 15.9)     | 3.6 (2.6, 4.5) |
| <b>Guyana</b>        |         |       |                   |                |                |                |                   |                 |                |                   |                |                |                   |                |
| Age 25-69            | 290133  | 359   | 8.8 (8, 9.5)      | 2 (1.8, 2.2)   | 0.5 (0.4, 0.5) | 4 (3, 5)       | 78 (67, 89)       | 4 (3, 6)        | 14 (10, 18)    | 299 (256, 345)    | 17 (10, 25)    | 1 (0.7, 1.2)   | 21.7 (19.1, 24.2) | 1.2 (0.8, 1.6) |
| Age 70+              | 23806   | 498   | 8.7 (7.7, 9.8)    | 1.9 (1.6, 2.3) | 0.4 (0.3, 0.5) | 3 (2, 4)       | 72 (57, 88)       | 3 (2, 5)        | 122 (81, 177)  | 2852 (2256, 3458) | 130 (60, 219)  | 0.6 (0.4, 0.8) | 14.4 (11.4, 17.4) | 0.6 (0.2, 1.1) |
| Female               | 160462  | 369   | 8.9 (6.9, 10.8)   | 2 (1.4, 2.7)   | 0.5 (0.2, 0.8) | 3 (2, 4)       | 61 (49, 73)       | 3 (2, 5)        | 16 (11, 21)    | 352 (287, 416)    | 19 (11, 28)    | 0.7 (0.5, 1)   | 16.5 (13.9, 19.2) | 0.8 (0.4, 1.3) |
| Male                 | 153477  | 487   | 8.7 (6.7, 10.6)   | 2 (1.3, 2.6)   | 0.5 (0.1, 0.8) | 4 (3, 5)       | 88 (73, 103)      | 4 (3, 7)        | 24 (17, 32)    | 531 (448, 614)    | 28 (16, 43)    | 0.8 (0.5, 1.1) | 18.1 (15.3, 21.1) | 0.9 (0.4, 1.4) |
| All                  | 313939  | 857   | 8.8 (7.4, 10.1)   | 2 (1.5, 2.4)   | 0.5 (0.2, 0.7) | 7 (5, 8)       | 149 (130, 168)    | 8 (5, 10)       | 20 (15, 24)    | 439 (383, 491)    | 23 (16, 32)    | 0.8 (0.6, 1)   | 17.4 (15.3, 19.4) | 0.9 (0.6, 1.2) |
| <b>Haiti</b>         |         |       |                   |                |                |                |                   |                 |                |                   |                |                |                   |                |

|                  |           |        |                   |                 |                |                    |                      |                      |                   |                   |                   |                   |                   |                   |
|------------------|-----------|--------|-------------------|-----------------|----------------|--------------------|----------------------|----------------------|-------------------|-------------------|-------------------|-------------------|-------------------|-------------------|
| Age 25-69        | 2585014   | 2243   | 7.4 (6.8, 8)      | 4.3 (3.9, 4.7)  | 0.4 (0.3, 0.5) | 34 (24, 45)        | 378 (312, 448)       | 16 (9, 25)           | 13 (9, 17)        | 143 (118, 170)    | 6 (3, 10)         | 1.5 (1.1, 1.9)    | 16.8 (14.6, 19)   | 0.7 (0.4, 1)      |
| Age 70+          | 157120    | 1983   | 7.4 (6.4, 8.4)    | 4.2 (3.6, 4.7)  | 0.4 (0.2, 0.5) | 20 (12, 31)        | 236 (178, 300)       | 8 (3, 15)            | 128 (79, 199)     | 1524 (1145, 1934) | 52 (19, 100)      | 1 (0.6, 1.4)      | 11.9 (9.2, 14.6)  | 0.4 (0.1, 0.7)    |
| Female           | 1429834   | 2423   | 7.5 (5.8, 9.2)    | 4.4 (3.2, 5.5)  | 0.4 (0.1, 0.7) | 31 (20, 43)        | 344 (270, 417)       | 14 (7, 23)           | 22 (14, 31)       | 248 (195, 301)    | 10 (5, 17)        | 1.3 (0.8, 1.7)    | 14.2 (11.6, 16.8) | 0.6 (0.2, 0.9)    |
| Male             | 1312300   | 1810   | 7.3 (5.7, 9)      | 4.2 (3.1, 5.3)  | 0.4 (0.1, 0.7) | 23 (16, 32)        | 270 (216, 329)       | 10 (5, 17)           | 17 (12, 24)       | 204 (162, 248)    | 8 (4, 13)         | 1.3 (0.8, 1.7)    | 14.9 (12.4, 17.4) | 0.6 (0.2, 0.9)    |
| All              | 2742134   | 4231   | 7.4 (6.3, 8.6)    | 4.3 (3.5, 5.1)  | 0.4 (0.2, 0.6) | 54 (42, 68)        | 614 (521, 705)       | 24 (15, 35)          | 20 (15, 25)       | 226 (192, 261)    | 9 (5, 13)         | 1.3 (1, 1.6)      | 14.5 (12.7, 16.3) | 0.6 (0.3, 0.8)    |
| <b>Honduras</b>  |           |        |                   |                 |                |                    |                      |                      |                   |                   |                   |                   |                   |                   |
| Age 25-69        | 1596743   | 1464   | 9.8 (9, 10.5)     | 3 (2.7, 3.3)    | 1.3 (1, 1.5)   | 18 (13, 23)        | 287 (244, 332)       | 135 (99, 173)        | 11 (8, 14)        | 175 (150, 203)    | 83 (62, 105)      | 1.2 (0.9, 1.5)    | 19.6 (17.1, 22)   | 9.2 (6.9, 11.5)   |
| Age 70+          | 94230     | 1544   | 9.7 (8.4, 11)     | 2.9 (2.4, 3.3)  | 1.2 (0.8, 1.5) | 12 (8, 17)         | 207 (160, 253)       | 88 (56, 124)         | 135 (85, 200)     | 2371 (1824, 2926) | 1002 (620, 1442)  | 0.8 (0.5, 1.1)    | 13.4 (10.6, 16.1) | 5.7 (3.3, 8.1)    |
| Female           | 855166    | 1393   | 9.9 (7.7, 12)     | 3 (2.2, 3.8)    | 1.3 (0.9, 1.7) | 14 (10, 19)        | 226 (184, 266)       | 105 (73, 142)        | 18 (12, 25)       | 296 (236, 358)    | 137 (92, 191)     | 1 (0.6, 1.3)      | 16.2 (13.4, 18.8) | 7.5 (5.1, 9.9)    |
| Male             | 835807    | 1613   | 9.6 (7.5, 11.8)   | 2.9 (2.1, 3.7)  | 1.2 (0.8, 1.7) | 16 (11, 22)        | 269 (222, 315)       | 119 (82, 159)        | 21 (15, 29)       | 354 (291, 420)    | 155 (107, 210)    | 1 (0.6, 1.3)      | 16.7 (13.9, 19.3) | 7.4 (4.7, 10.1)   |
| All              | 1690973   | 3011   | 9.8 (8.2, 11.3)   | 3 (2.4, 3.6)    | 1.3 (1, 1.6)   | 30 (23, 37)        | 494 (429, 559)       | 224 (173, 276)       | 19 (15, 24)       | 324 (275, 371)    | 146 (111, 182)    | 1 (0.7, 1.2)      | 16.4 (14.5, 18.4) | 7.4 (5.7, 9.2)    |
| <b>Hungary</b>   |           |        |                   |                 |                |                    |                      |                      |                   |                   |                   |                   |                   |                   |
| Age 25-69        | 5942779   | 13698  | 12.7 (12.4, 12.9) | 8.4 (8.1, 8.8)  | 1.2 (1.1, 1.2) | 827 (661, 996)     | 1149 (925, 1369)     | 1062 (922, 1232)     | 141 (113, 171)    | 196 (158, 234)    | 181 (157, 209)    | 6 (5.1, 6.9)      | 8.4 (7.3, 9.6)    | 7.8 (7, 8.5)      |
| Age 70+          | 856045    | 24998  | 12.7 (12.2, 13.1) | 8.1 (7.5, 8.7)  | 1.1 (1, 1.2)   | 1073 (773, 1424)   | 1485 (1094, 1903)    | 1179 (965, 1412)     | 1289 (909, 1732)  | 1776 (1292, 2314) | 1408 (1148, 1701) | 4.3 (3, 5.4)      | 5.9 (4.4, 7.4)    | 4.7 (3.9, 5.6)    |
| Female           | 3647167   | 18579  | 12.8 (10, 15.6)   | 8.5 (6.5, 10.5) | 1.2 (0.8, 1.6) | 900 (634, 1212)    | 1165 (836, 1535)     | 985 (792, 1196)      | 303 (206, 424)    | 393 (274, 533)    | 328 (258, 407)    | 4.8 (3.9, 5.8)    | 6.3 (5.1, 7.5)    | 5.3 (4.6, 6)      |
| Male             | 3151657   | 20160  | 12.5 (9.8, 15.3)  | 8.3 (6.3, 10.2) | 1.1 (0.7, 1.5) | 1000 (803, 1238)   | 1469 (1187, 1777)    | 1256 (1084, 1437)    | 344 (273, 430)    | 507 (408, 619)    | 430 (367, 491)    | 5 (3.9, 6.1)      | 7.3 (5.9, 8.7)    | 6.2 (5.4, 7)      |
| All              | 6798824   | 38702  | 12.7 (10.7, 14.6) | 8.4 (7, 9.8)    | 1.2 (0.9, 1.4) | 1900 (1556, 2260)  | 2633 (2203, 3095)    | 2241 (1977, 2518)    | 322 (258, 392)    | 445 (363, 531)    | 375 (326, 426)    | 4.9 (4.3, 5.6)    | 6.8 (6, 7.7)      | 5.8 (5.2, 6.3)    |
| <b>Iceland</b>   |           |        |                   |                 |                |                    |                      |                      |                   |                   |                   |                   |                   |                   |
| Age 25-69        | 130721    | 124    | 15.6 (15.3, 15.8) | 2.9 (2.8, 3.1)  | 1.5 (1.5, 1.6) | 14 (11, 16)        | 23 (18, 27)          | 14 (12, 16)          | 120 (97, 143)     | 198 (159, 234)    | 120 (103, 139)    | 11.1 (9.7, 12.5)  | 18.3 (16.4, 20.4) | 11.1 (10.1, 12.1) |
| Age 70+          | 18351     | 430    | 15.5 (15.1, 15.9) | 2.8 (2.5, 3.1)  | 1.4 (1.3, 1.5) | 35 (26, 44)        | 56 (43, 70)          | 30 (25, 36)          | 2030 (1508, 2610) | 3271 (2453, 4125) | 1761 (1451, 2116) | 8 (6.3, 9.7)      | 13 (10.2, 15.6)   | 7 (6, 8.1)        |
| Female           | 75094     | 244    | 15.8 (12.4, 19.1) | 3 (2.1, 3.8)    | 1.5 (1.1, 2)   | 21 (15, 28)        | 33 (23, 43)          | 18 (14, 23)          | 320 (215, 434)    | 496 (338, 665)    | 276 (212, 351)    | 8.6 (7.2, 10)     | 13.4 (11.5, 15.4) | 7.5 (6.7, 8.4)    |
| Male             | 73978     | 310    | 15.4 (12.1, 18.7) | 2.9 (2.1, 3.7)  | 1.5 (1.1, 1.9) | 27 (21, 33)        | 46 (36, 55)          | 26 (21, 30)          | 419 (327, 516)    | 701 (553, 853)    | 391 (328, 456)    | 8.8 (7.5, 10.1)   | 14.8 (12.7, 16.9) | 8.3 (7.3, 9.3)    |
| All              | 149072    | 554    | 15.6 (13.2, 17.9) | 2.9 (2.3, 3.5)  | 1.5 (1.2, 1.8) | 48 (39, 58)        | 79 (64, 93)          | 44 (38, 50)          | 370 (299, 446)    | 600 (489, 715)    | 334 (291, 384)    | 8.7 (7.8, 9.7)    | 14.2 (12.7, 15.6) | 7.9 (7.3, 8.5)    |
| <b>India</b>     |           |        |                   |                 |                |                    |                      |                      |                   |                   |                   |                   |                   |                   |
| Age 25-69        | 355463126 | 361122 | 4 (4, 4.1)        | 4.8 (4.4, 5.2)  | 0.9 (0.9, 1)   | 6010 (4393, 8050)  | 58830 (49300, 68448) | 19793 (17098, 22552) | 18 (13, 23)       | 172 (143, 201)    | 58 (50, 66)       | 1.7 (1.2, 2.1)    | 16.3 (14.3, 18.3) | 5.5 (4.9, 6.1)    |
| Age 70+          | 18651832  | 243202 | 4 (3.9, 4.1)      | 4.6 (4, 5.2)    | 0.9 (0.8, 0.9) | 2594 (1629, 3764)  | 27464 (21319, 33975) | 8019 (6527, 9593)    | 141 (89, 204)     | 1492 (1160, 1840) | 435 (354, 524)    | 1.1 (0.7, 1.5)    | 11.3 (8.9, 14)    | 3.3 (2.7, 3.9)    |
| Female           | 179632398 | 230198 | 4.1 (3.1, 5.1)    | 4.8 (3.6, 6)    | 0.9 (0.6, 1.3) | 3137 (2198, 4313)  | 31342 (25121, 37597) | 10298 (8603, 12081)  | 20 (14, 27)       | 198 (158, 240)    | 65 (54, 76)       | 1.4 (0.9, 1.8)    | 13.6 (11.1, 16)   | 4.5 (3.8, 5.1)    |
| Male             | 194482560 | 374287 | 4 (3, 4.9)        | 4.7 (3.5, 5.9)  | 0.9 (0.5, 1.3) | 5468 (3813, 7519)  | 54951 (45947, 64546) | 17514 (15110, 20135) | 30 (21, 40)       | 299 (250, 351)    | 95 (82, 109)      | 1.5 (0.9, 2)      | 14.7 (12.2, 17.1) | 4.7 (4, 5.4)      |
| All              | 374114958 | 604880 | 4 (3.3, 4.7)      | 4.8 (3.9, 5.6)  | 0.9 (0.7, 1.2) | 8604 (6764, 10898) | 86293 (75553, 98311) | 27812 (24699, 30897) | 25 (20, 32)       | 250 (219, 284)    | 80 (71, 89)       | 1.4 (1.1, 1.7)    | 14.3 (12.4, 16)   | 4.6 (4.1, 5.1)    |
| <b>Indonesia</b> |           |        |                   |                 |                |                    |                      |                      |                   |                   |                   |                   |                   |                   |
| Age 25-69        | 74467685  | 31009  | 18.8 (18.3, 19.2) | 3.2 (3.1, 3.3)  | 0.8 (0.8, 0.9) | 5597 (4554, 6667)  | 5825 (4712, 6959)    | 1374 (1129, 1650)    | 77 (62, 91)       | 80 (65, 95)       | 19 (15, 22)       | 18.1 (16, 20.3)   | 18.8 (16.5, 21.1) | 4.5 (3.9, 5)      |
| Age 70+          | 4021292   | 30419  | 18.7 (17.9, 19.4) | 3.1 (3, 3.2)    | 0.8 (0.7, 0.8) | 3934 (2959, 4881)  | 4054 (3050, 5050)    | 822 (633, 1056)      | 982 (738, 1221)   | 1011 (761, 1258)  | 205 (158, 265)    | 12.9 (10.3, 15.6) | 13.3 (10.5, 16.1) | 2.7 (2.1, 3.3)    |
| Female           | 39897866  | 24971  | 19.1 (15, 23.1)   | 3.2 (2.3, 4.1)  | 0.8 (0.5, 1.2) | 3794 (3049, 4644)  | 3812 (3062, 4661)    | 859 (681, 1058)      | 107 (84, 130)     | 107 (85, 131)     | 24 (19, 29)       | 15.2 (12.8, 17.9) | 15.3 (12.8, 17.7) | 3.5 (2.9, 4)      |
| Male             | 38591111  | 36520  | 18.5 (14.6, 22.5) | 3.2 (2.3, 4)    | 0.8 (0.5, 1.2) | 5736 (4628, 6807)  | 6067 (4893, 7209)    | 1337 (1067, 1606)    | 159 (127, 188)    | 168 (134, 199)    | 37 (30, 44)       | 15.7 (13.1, 18.3) | 16.6 (14.1, 19.2) | 3.7 (3, 4.3)      |
| All              | 78488977  | 61349  | 18.8 (16, 21.6)   | 3.2 (2.6, 3.8)  | 0.8 (0.6, 1.1) | 9530 (8116, 10912) | 9879 (8394, 11303)   | 2196 (1879, 2557)    | 132 (112, 151)    | 137 (116, 156)    | 30 (26, 35)       | 15.5 (13.7, 17.3) | 16.1 (14.1, 17.9) | 3.6 (3.1, 4)      |
| <b>Iran</b>      |           |        |                   |                 |                |                    |                      |                      |                   |                   |                   |                   |                   |                   |
| Age 25-69        | 18600154  | 28523  | 9.9 (9.1, 10.7)   | 6.1 (5.6, 6.5)  | 1.8 (1.7, 1.9) | 557 (412, 722)     | 3848 (3172, 4516)    | 4361 (3819, 4978)    | 26 (19, 33)       | 178 (148, 208)    | 204 (179, 231)    | 2 (1.4, 2.5)      | 13.5 (11.3, 15.5) | 15.3 (13.8, 16.7) |
| Age 70+          | 942172    | 19845  | 9.8 (8.5, 11.3)   | 5.9 (5.1, 6.6)  | 1.7 (1.6, 1.9) | 257 (169, 373)     | 1894 (1454, 2350)    | 1917 (1602, 2280)    | 302 (194, 449)    | 2234 (1701, 2827) | 2241 (1862, 2658) | 1.3 (0.8, 1.8)    | 9.5 (7.5, 11.7)   | 9.7 (8.3, 11.2)   |

|                |          |        |                   |                |                |                   |                      |                   |                   |                   |                  |                |                   |                  |
|----------------|----------|--------|-------------------|----------------|----------------|-------------------|----------------------|-------------------|-------------------|-------------------|------------------|----------------|-------------------|------------------|
| Female         | 9829851  | 18100  | 10 (7.8, 12.2)    | 6.1 (4.6, 7.6) | 1.9 (1.4, 2.4) | 305 (212, 423)    | 2085 (1649, 2488)    | 2344 (2001, 2690) | 34 (23, 48)       | 234 (182, 282)    | 259 (219, 299)   | 1.7 (1, 2.4)   | 11.5 (9.2, 14)    | 13 (11.3, 14.7)  |
| Male           | 9712475  | 30236  | 9.8 (7.6, 11.9)   | 6 (4.6, 7.5)   | 1.8 (1.3, 2.3) | 509 (360, 690)    | 3658 (2956, 4361)    | 3934 (3379, 4541) | 53 (38, 72)       | 386 (310, 462)    | 411 (357, 470)   | 1.7 (1, 2.3)   | 12.1 (9.7, 14.5)  | 13 (11.1, 14.6)  |
| All            | 19542326 | 48326  | 9.9 (8.4, 11.4)   | 6.1 (5, 7.1)   | 1.8 (1.5, 2.2) | 814 (628, 1017)   | 5742 (4930, 6593)    | 6278 (5647, 6995) | 44 (34, 56)       | 311 (266, 358)    | 336 (301, 371)   | 1.7 (1.2, 2.1) | 11.9 (10.3, 13.6) | 13 (11.8, 14.2)  |
| <b>Iraq</b>    |          |        |                   |                |                |                   |                      |                   |                   |                   |                  |                |                   |                  |
| Age 25-69      | 5261022  | 6203   | 10.6 (9.8, 11.5)  | 4.3 (4, 4.6)   | 1.5 (1.2, 1.7) | 131 (97, 170)     | 1029 (833, 1223)     | 674 (509, 871)    | 21 (16, 27)       | 163 (133, 192)    | 107 (82, 138)    | 2.1 (1.6, 2.6) | 16.6 (14.2, 18.9) | 10.9 (8.6, 13.4) |
| Age 70+        | 418006   | 8574   | 10.6 (9.2, 11.9)  | 4.1 (3.6, 4.7) | 1.4 (1, 1.7)   | 130 (87, 182)     | 1011 (787, 1264)     | 598 (393, 819)    | 328 (214, 477)    | 2491 (1931, 3131) | 1475 (947, 2082) | 1.5 (0.9, 2.2) | 11.8 (9.2, 14.5)  | 7 (4.3, 9.3)     |
| Female         | 3014095  | 7645   | 10.8 (8.4, 13.2)  | 4.3 (3.2, 5.4) | 1.4 (1, 1.9)   | 147 (105, 198)    | 1032 (819, 1266)     | 645 (463, 855)    | 44 (32, 59)       | 307 (245, 376)    | 192 (138, 256)   | 1.9 (1.3, 2.6) | 13.5 (11.1, 15.8) | 8.4 (5.8, 11.2)  |
| Male           | 2664933  | 7114   | 10.4 (8.1, 12.7)  | 4.3 (3.2, 5.4) | 1.4 (1, 1.9)   | 114 (79, 156)     | 1008 (803, 1216)     | 627 (444, 836)    | 30 (22, 42)       | 265 (213, 316)    | 167 (121, 220)   | 1.6 (1, 2.2)   | 14.2 (11.4, 16.9) | 8.8 (6.2, 11.4)  |
| All            | 5679028  | 14784  | 10.6 (9, 12.3)    | 4.3 (3.5, 5.1) | 1.4 (1.1, 1.8) | 261 (206, 324)    | 2040 (1748, 2339)    | 1272 (990, 1573)  | 37 (30, 46)       | 287 (246, 328)    | 180 (142, 220)   | 1.8 (1.3, 2.2) | 13.8 (12, 15.8)   | 8.6 (6.8, 10.5)  |
| <b>Ireland</b> |          |        |                   |                |                |                   |                      |                   |                   |                   |                  |                |                   |                  |
| Age 25-69      | 1705904  | 2643   | 13.8 (13.5, 14.1) | 4.6 (4.3, 5)   | 1 (1, 1.1)     | 202 (158, 251)    | 406 (325, 487)       | 157 (134, 185)    | 116 (91, 143)     | 232 (188, 277)    | 90 (77, 106)     | 7.6 (6.6, 8.7) | 15.4 (13.4, 17.3) | 5.9 (5.4, 6.5)   |
| Age 70+        | 270762   | 6690   | 13.7 (13.2, 14.2) | 4.4 (3.8, 5.1) | 0.9 (0.9, 1)   | 379 (280, 484)    | 747 (578, 919)       | 252 (208, 306)    | 1509 (1089, 1965) | 2968 (2265, 3714) | 993 (814, 1219)  | 5.7 (4.2, 7.1) | 11.2 (8.7, 13.6)  | 3.8 (3.1, 4.4)   |
| Female         | 1016241  | 3986   | 13.9 (10.9, 16.9) | 4.6 (3.4, 5.8) | 1 (0.6, 1.4)   | 246 (171, 328)    | 462 (338, 592)       | 163 (129, 204)    | 225 (152, 306)    | 422 (302, 550)    | 149 (116, 189)   | 6.2 (5, 7.3)   | 11.6 (9.7, 13.4)  | 4.1 (3.5, 4.6)   |
| Male           | 960425   | 5355   | 13.6 (10.7, 16.5) | 4.5 (3.4, 5.7) | 1 (0.6, 1.4)   | 334 (261, 413)    | 690 (549, 823)       | 246 (210, 288)    | 334 (261, 415)    | 688 (552, 819)    | 245 (210, 287)   | 6.2 (5, 7.5)   | 12.9 (10.8, 15)   | 4.6 (4, 5.2)     |
| All            | 1976666  | 9352   | 13.8 (11.7, 15.9) | 4.6 (3.8, 5.4) | 1 (0.7, 1.3)   | 580 (464, 697)    | 1153 (954, 1346)     | 409 (357, 471)    | 279 (223, 337)    | 553 (455, 649)    | 196 (170, 226)   | 6.2 (5.3, 7)   | 12.3 (10.9, 13.8) | 4.4 (3.9, 4.8)   |
| <b>Israel</b>  |          |        |                   |                |                |                   |                      |                   |                   |                   |                  |                |                   |                  |
| Age 25-69      | 2121801  | 2166   | 8.9 (8.7, 9.1)    | 7.4 (6.7, 8)   | 1.1 (1.1, 1.2) | 48 (31, 71)       | 221 (170, 280)       | 149 (125, 172)    | 23 (15, 34)       | 109 (85, 135)     | 74 (62, 84)      | 2.2 (1.5, 2.8) | 10.2 (8.6, 11.8)  | 6.9 (6.1, 7.5)   |
| Age 70+        | 294613   | 6445   | 8.8 (8.5, 9.1)    | 7 (6.1, 8.1)   | 1 (0.9, 1.1)   | 92 (53, 152)      | 471 (339, 625)       | 276 (221, 334)    | 320 (178, 543)    | 1639 (1167, 2203) | 959 (762, 1166)  | 1.4 (0.7, 2.1) | 7.3 (5.3, 9.4)    | 4.3 (3.5, 5)     |
| Female         | 1248682  | 3905   | 9 (7, 11)         | 7.4 (5.6, 9.2) | 1.1 (0.7, 1.5) | 61 (33, 104)      | 299 (203, 411)       | 188 (147, 232)    | 54 (28, 96)       | 265 (176, 372)    | 166 (127, 208)   | 1.6 (1, 2.1)   | 7.7 (6, 9.2)      | 4.8 (4.1, 5.4)   |
| Male           | 1167732  | 4691   | 8.8 (6.8, 10.7)   | 7.3 (5.5, 9)   | 1.1 (0.7, 1.5) | 79 (49, 130)      | 394 (290, 513)       | 236 (196, 278)    | 70 (44, 114)      | 346 (256, 453)    | 209 (173, 247)   | 1.7 (1, 2.3)   | 8.4 (6.7, 10.3)   | 5 (4.3, 5.8)     |
| All            | 2416414  | 8601   | 8.9 (7.5, 10.3)   | 7.3 (6.1, 8.6) | 1.1 (0.8, 1.4) | 140 (95, 202)     | 693 (544, 853)       | 424 (366, 488)    | 61 (41, 91)       | 304 (239, 380)    | 186 (160, 216)   | 1.6 (1.2, 2.1) | 8.1 (6.7, 9.3)    | 4.9 (4.5, 5.4)   |
| <b>Italy</b>   |          |        |                   |                |                |                   |                      |                   |                   |                   |                  |                |                   |                  |
| Age 25-69      | 32944716 | 26557  | 9.8 (9.7, 10)     | 5.5 (5.1, 5.8) | 0.9 (0.9, 1)   | 441 (307, 616)    | 3681 (3001, 4456)    | 1389 (1167, 1620) | 14 (10, 19)       | 115 (94, 139)     | 43 (37, 50)      | 1.7 (1.3, 2.1) | 13.9 (12.1, 15.6) | 5.2 (4.7, 5.8)   |
| Age 70+        | 5514414  | 89807  | 9.8 (9.5, 10.1)   | 5.3 (4.6, 6)   | 0.9 (0.8, 0.9) | 967 (594, 1585)   | 8708 (6702, 11132)   | 2820 (2251, 3427) | 187 (112, 310)    | 1683 (1271, 2168) | 542 (428, 665)   | 1.1 (0.6, 1.5) | 9.7 (7.6, 11.8)   | 3.1 (2.6, 3.7)   |
| Female         | 20272609 | 57798  | 9.9 (7.7, 12.1)   | 5.5 (4.1, 6.9) | 0.9 (0.6, 1.3) | 658 (354, 1244)   | 5725 (3894, 7850)    | 1958 (1489, 2501) | 45 (22, 89)       | 391 (254, 557)    | 132 (97, 172)    | 1.1 (0.8, 1.5) | 9.9 (8.3, 11.5)   | 3.4 (3, 3.8)     |
| Male           | 18186521 | 58612  | 9.7 (7.6, 11.9)   | 5.4 (4.1, 6.7) | 0.9 (0.5, 1.3) | 750 (516, 1056)   | 6665 (5327, 8060)    | 2251 (1899, 2630) | 53 (35, 79)       | 474 (364, 586)    | 157 (129, 187)   | 1.3 (0.9, 1.7) | 11.4 (9.6, 13.2)  | 3.8 (3.3, 4.3)   |
| All            | 38459130 | 116306 | 9.8 (8.3, 11.4)   | 5.4 (4.5, 6.4) | 0.9 (0.7, 1.2) | 1408 (1007, 2041) | 12390 (10209, 14768) | 4209 (3634, 4834) | 49 (33, 73)       | 431 (349, 525)    | 144 (121, 168)   | 1.2 (1, 1.5)   | 10.7 (9.5, 11.8)  | 3.6 (3.3, 4)     |
| <b>Jamaica</b> |          |        |                   |                |                |                   |                      |                   |                   |                   |                  |                |                   |                  |
| Age 25-69      | 919929   | 393    | 8.2 (8, 8.4)      | 5 (4.8, 5.2)   | 0.5 (0.4, 0.5) | 6 (5, 7)          | 60 (50, 70)          | 4 (3, 6)          | 7 (6, 8)          | 67 (57, 77)       | 5 (3, 7)         | 1.5 (1.3, 1.8) | 15.3 (13.4, 17.1) | 1.1 (0.7, 1.5)   |
| Age 70+        | 118260   | 1363   | 8.1 (7.9, 8.4)    | 4.8 (4.6, 5.1) | 0.4 (0.3, 0.5) | 13 (9, 18)        | 142 (108, 180)       | 8 (3, 15)         | 114 (81, 158)     | 1240 (933, 1587)  | 73 (28, 136)     | 1 (0.7, 1.2)   | 10.4 (8.2, 12.6)  | 0.6 (0.3, 1)     |
| Female         | 539886   | 952    | 8.2 (6.4, 10.1)   | 5 (3.8, 6.3)   | 0.5 (0.1, 0.8) | 10 (7, 14)        | 106 (76, 139)        | 7 (3, 13)         | 18 (12, 25)       | 191 (136, 251)    | 13 (5, 24)       | 1.1 (0.8, 1.3) | 11.1 (9.4, 12.9)  | 0.7 (0.4, 1.1)   |
| Male           | 498303   | 806    | 8.1 (6.3, 9.9)    | 4.9 (3.7, 6.2) | 0.4 (0.1, 0.7) | 9 (7, 12)         | 96 (75, 119)         | 6 (3, 10)         | 18 (13, 23)       | 186 (146, 227)    | 11 (6, 19)       | 1.1 (0.9, 1.4) | 12 (10, 13.8)     | 0.7 (0.4, 1)     |
| All            | 1038189  | 1756   | 8.1 (6.9, 9.4)    | 5 (4.1, 5.9)   | 0.4 (0.2, 0.7) | 19 (15, 24)       | 202 (165, 242)       | 13 (7, 20)        | 18 (14, 23)       | 188 (155, 226)    | 12 (7, 19)       | 1.1 (0.9, 1.3) | 11.5 (10.1, 12.8) | 0.7 (0.5, 1)     |
| <b>Japan</b>   |          |        |                   |                |                |                   |                      |                   |                   |                   |                  |                |                   |                  |
| Age 25-69      | 71690145 | 19704  | 7.5 (7.4, 7.6)    | 4.2 (4.1, 4.2) | 1 (1, 1)       | 257 (212, 305)    | 3285 (2761, 3831)    | 1197 (1025, 1381) | 4 (4, 5)          | 57 (46, 66)       | 20 (17, 24)      | 1.3 (1.1, 1.5) | 16.7 (14.9, 18.5) | 6.1 (5.5, 6.7)   |
| Age 70+        | 9650754  | 65376  | 7.5 (7.3, 7.7)    | 4 (3.9, 4.1)   | 0.9 (0.9, 1)   | 548 (398, 704)    | 7530 (5655, 9452)    | 2382 (1915, 2903) | 64 (46, 85)       | 889 (657, 1133)   | 279 (220, 343)   | 0.8 (0.7, 1)   | 11.5 (9.4, 13.9)  | 3.6 (3, 4.3)     |
| Female         | 42249201 | 42248  | 7.6 (5.9, 9.3)    | 4.2 (3.1, 5.3) | 1 (0.6, 1.4)   | 380 (267, 513)    | 5088 (3643, 6608)    | 1691 (1320, 2121) | 17 (11, 25)       | 232 (150, 317)    | 76 (55, 100)     | 0.9 (0.8, 1.1) | 12 (10.2, 13.7)   | 4 (3.5, 4.5)     |
| Male           | 39091698 | 42717  | 7.4 (5.7, 9.1)    | 4.1 (3, 5.2)   | 1 (0.6, 1.4)   | 425 (332, 525)    | 5727 (4552, 6964)    | 1887 (1572, 2216) | 18 (13, 23)       | 244 (181, 305)    | 78 (63, 95)      | 1 (0.8, 1.2)   | 13.4 (11.4, 15.3) | 4.4 (3.9, 4.9)   |

|                   |          |       |                   |                |                |                   |                     |                   |                   |                   |                  |                   |                   |                 |
|-------------------|----------|-------|-------------------|----------------|----------------|-------------------|---------------------|-------------------|-------------------|-------------------|------------------|-------------------|-------------------|-----------------|
| All               | 81340899 | 84969 | 7.5 (6.3, 8.7)    | 4.2 (3.4, 4.9) | 1 (0.7, 1.3)   | 805 (648, 973)    | 10815 (8864, 12941) | 3578 (3078, 4140) | 17 (13, 22)       | 237 (186, 294)    | 77 (63, 91)      | 0.9 (0.8, 1.1)    | 12.7 (11.5, 14.1) | 4.2 (3.8, 4.6)  |
| <b>Jordan</b>     |          |       |                   |                |                |                   |                     |                   |                   |                   |                  |                   |                   |                 |
| Age 25-69         | 1004992  | 1311  | 11.7 (10.8, 12.6) | 4.6 (4.2, 5)   | 1.2 (1, 1.4)   | 54 (41, 69)       | 218 (180, 258)      | 117 (88, 150)     | 49 (38, 62)       | 197 (163, 232)    | 106 (80, 135)    | 4.1 (3.2, 5)      | 16.6 (14.4, 18.9) | 8.9 (6.9, 11)   |
| Age 70+           | 78439    | 1779  | 11.7 (10.3, 13.1) | 4.4 (3.9, 5)   | 1.1 (0.9, 1.4) | 49 (33, 69)       | 197 (146, 250)      | 93 (59, 132)      | 542 (371, 746)    | 2206 (1681, 2716) | 1053 (683, 1463) | 2.7 (1.8, 3.7)    | 11.1 (8.6, 13.6)  | 5.2 (3.3, 7.2)  |
| Female            | 515167   | 1168  | 11.8 (9.2, 14.4)  | 4.6 (3.4, 5.8) | 1.2 (0.8, 1.7) | 40 (28, 55)       | 149 (116, 185)      | 77 (53, 106)      | 60 (44, 80)       | 225 (178, 276)    | 118 (85, 159)    | 3.4 (2.4, 4.4)    | 12.7 (10.1, 15.1) | 6.6 (4.4, 8.7)  |
| Male              | 568264   | 1918  | 11.6 (9.1, 14.1)  | 4.6 (3.4, 5.7) | 1.2 (0.8, 1.6) | 63 (46, 82)       | 266 (214, 320)      | 133 (97, 174)     | 92 (70, 119)      | 390 (321, 462)    | 198 (148, 258)   | 3.3 (2.3, 4.2)    | 13.9 (11.3, 16.5) | 6.9 (4.7, 9)    |
| All               | 1083431  | 3090  | 11.7 (9.9, 13.5)  | 4.6 (3.7, 5.4) | 1.2 (0.9, 1.5) | 103 (81, 125)     | 415 (350, 478)      | 210 (167, 259)    | 77 (62, 93)       | 310 (267, 354)    | 159 (128, 195)   | 3.3 (2.6, 4)      | 13.4 (11.6, 15.1) | 6.8 (5.3, 8.2)  |
| <b>Kazakhstan</b> |          |       |                   |                |                |                   |                     |                   |                   |                   |                  |                   |                   |                 |
| Age 25-69         | 7954590  | 12960 | 14.8 (13.6, 15.9) | 5.8 (5.3, 6.2) | 0.8 (0.7, 0.8) | 1383 (1140, 1643) | 1830 (1530, 2131)   | 526 (451, 608)    | 173 (144, 204)    | 228 (191, 264)    | 66 (56, 76)      | 10.7 (9.2, 12.2)  | 14.1 (12.3, 15.9) | 4.1 (3.6, 4.6)  |
| Age 70+           | 607515   | 21812 | 14.8 (12.9, 16.8) | 5.5 (4.8, 6.3) | 0.7 (0.7, 0.8) | 1558 (1130, 2037) | 2053 (1531, 2656)   | 507 (401, 632)    | 2314 (1683, 3016) | 3063 (2296, 3891) | 763 (603, 947)   | 7.1 (4.8, 9.2)    | 9.4 (6.5, 12)     | 2.3 (1.8, 2.8)  |
| Female            | 4603878  | 18950 | 14.8 (11.6, 18)   | 5.8 (4.4, 7.2) | 0.8 (0.4, 1.1) | 1489 (1060, 1971) | 1937 (1430, 2490)   | 511 (400, 640)    | 330 (234, 435)    | 429 (315, 555)    | 113 (89, 142)    | 7.9 (6.4, 9.5)    | 10.2 (8.3, 12.2)  | 2.7 (2.3, 3.1)  |
| Male              | 3958227  | 15816 | 14.8 (11.6, 17.9) | 5.7 (4.3, 7.1) | 0.8 (0.4, 1.1) | 1452 (1173, 1720) | 1946 (1590, 2277)   | 522 (443, 612)    | 393 (318, 465)    | 526 (432, 613)    | 141 (121, 164)   | 9.2 (7.3, 11)     | 12.3 (9.8, 14.5)  | 3.3 (2.7, 3.9)  |
| All               | 8562105  | 34786 | 14.8 (12.5, 17)   | 5.7 (4.7, 6.7) | 0.8 (0.5, 1)   | 2941 (2394, 3496) | 3883 (3213, 4550)   | 1033 (896, 1185)  | 358 (294, 423)    | 473 (393, 553)    | 126 (109, 144)   | 8.5 (7.2, 9.6)    | 11.2 (9.7, 12.6)  | 3 (2.6, 3.3)    |
| <b>Kenya</b>      |          |       |                   |                |                |                   |                     |                   |                   |                   |                  |                   |                   |                 |
| Age 25-69         | 6930000  | 2310  | 13.5 (12.4, 14.7) | 3.4 (3.1, 3.7) | 1.3 (1, 1.5)   | 182 (147, 220)    | 439 (362, 520)      | 223 (168, 290)    | 24 (20, 30)       | 59 (48, 69)       | 30 (23, 38)      | 7.9 (6.7, 9.1)    | 19 (16.6, 21.7)   | 9.7 (7.6, 12.1) |
| Age 70+           | 380435   | 2356  | 13.4 (11.6, 15.1) | 3.3 (2.9, 3.7) | 1.2 (0.9, 1.6) | 125 (91, 161)     | 303 (225, 382)      | 137 (89, 193)     | 329 (239, 424)    | 796 (590, 1001)   | 361 (230, 506)   | 5.4 (4.1, 6.6)    | 12.9 (10.2, 15.6) | 5.8 (3.6, 8.1)  |
| Female            | 3723364  | 1996  | 13.6 (10.7, 16.5) | 3.4 (2.5, 4.4) | 1.3 (0.9, 1.7) | 131 (99, 168)     | 303 (237, 380)      | 149 (100, 204)    | 33 (25, 42)       | 76 (59, 95)       | 38 (25, 51)      | 6.6 (5.2, 8.1)    | 15.2 (12.2, 17.9) | 7.5 (5.1, 9.9)  |
| Male              | 3587071  | 2663  | 13.3 (10.4, 16.2) | 3.4 (2.5, 4.3) | 1.3 (0.9, 1.7) | 176 (141, 215)    | 440 (355, 525)      | 211 (152, 279)    | 44 (35, 53)       | 108 (88, 129)     | 52 (38, 68)      | 6.7 (5.1, 8)      | 16.5 (13.5, 19.5) | 7.9 (5.4, 10.4) |
| All               | 7310435  | 4630  | 13.5 (11.4, 15.6) | 3.4 (2.7, 4)   | 1.3 (1, 1.6)   | 307 (259, 360)    | 743 (632, 862)      | 361 (288, 443)    | 38 (32, 45)       | 92 (78, 106)      | 45 (36, 55)      | 6.6 (5.6, 7.7)    | 16 (14, 18.1)     | 7.8 (6, 9.6)    |
| <b>Kiribati</b>   |          |       |                   |                |                |                   |                     |                   |                   |                   |                  |                   |                   |                 |
| Age 25-69         | 24917    | 27    | 27.6 (25.4, 29.8) | 1.5 (1.3, 1.7) | 1.1 (0.9, 1.3) | 7 (5, 8)          | 7 (5, 8)            | 2 (2, 3)          | 269 (226, 318)    | 269 (226, 318)    | 89 (66, 115)     | 23.9 (21.1, 26.7) | 23.9 (21, 26.6)   | 7.9 (5.9, 9.9)  |
| Age 70+           | 930      | 5     | 27.3 (23.8, 30.8) | 1.5 (1.1, 1.8) | 1 (0.7, 1.3)   | 1 (1, 1)          | 1 (1, 1)            | 0 (0, 0)          | 885 (689, 1096)   | 885 (689, 1096)   | 256 (154, 375)   | 16 (12.7, 19.4)   | 16 (12.6, 19.4)   | 4.6 (2.6, 6.7)  |
| Female            | 12194    | 9     | 28 (22.1, 33.9)   | 1.5 (1, 2.1)   | 1.1 (0.7, 1.5) | 2 (2, 2)          | 2 (2, 2)            | 1 (0, 1)          | 185 (150, 218)    | 185 (150, 218)    | 61 (42, 82)      | 22 (18.5, 25.6)   | 21.9 (18.5, 25.3) | 7.2 (4.6, 9.8)  |
| Male              | 13653    | 24    | 27.1 (21.4, 32.9) | 1.5 (1, 2)     | 1.1 (0.7, 1.5) | 5 (4, 6)          | 5 (4, 6)            | 2 (1, 2)          | 401 (323, 483)    | 401 (323, 483)    | 131 (91, 178)    | 22.8 (18.7, 26.8) | 22.7 (19, 26.5)   | 7.4 (4.9, 10)   |
| All               | 25847    | 33    | 27.6 (23.5, 31.7) | 1.5 (1.1, 1.9) | 1.1 (0.8, 1.4) | 7 (6, 9)          | 7 (6, 9)            | 2 (2, 3)          | 293 (252, 340)    | 293 (252, 340)    | 96 (73, 121)     | 22.5 (19.9, 25.2) | 22.5 (19.9, 25.3) | 7.4 (5.6, 9.1)  |
| <b>Kuwait</b>     |          |       |                   |                |                |                   |                     |                   |                   |                   |                  |                   |                   |                 |
| Age 25-69         | 937391   | 596   | 11.6 (10.6, 12.5) | 5.1 (5, 5.3)   | 1.3 (1, 1.5)   | 24 (20, 28)       | 97 (83, 112)        | 58 (44, 73)       | 23 (19, 27)       | 91 (79, 105)      | 55 (42, 68)      | 4 (3.3, 4.7)      | 16.3 (14, 18.8)   | 9.7 (7.1, 12.2) |
| Age 70+           | 15392    | 264   | 11.5 (10.1, 13)   | 4.9 (4.7, 5.2) | 1.2 (0.8, 1.5) | 7 (5, 9)          | 28 (21, 34)         | 15 (9, 21)        | 360 (263, 462)    | 1550 (1180, 1897) | 813 (493, 1159)  | 2.6 (1.9, 3.4)    | 10.5 (8, 12.9)    | 5.5 (3.1, 7.9)  |
| Female            | 394470   | 248   | 11.8 (9.2, 14.4)  | 5.2 (3.9, 6.5) | 1.3 (0.9, 1.7) | 9 (7, 11)         | 33 (27, 39)         | 20 (14, 25)       | 25 (20, 30)       | 90 (75, 106)      | 54 (40, 69)      | 3.7 (2.8, 4.6)    | 13.2 (10.7, 15.7) | 7.9 (5.3, 10.5) |
| Male              | 558313   | 612   | 11.4 (8.9, 13.9)  | 5.1 (3.8, 6.4) | 1.2 (0.8, 1.7) | 22 (18, 26)       | 92 (78, 107)        | 53 (40, 67)       | 39 (32, 47)       | 169 (143, 197)    | 95 (71, 121)     | 3.5 (2.7, 4.3)    | 15.1 (12.3, 17.9) | 8.7 (5.8, 11.4) |
| All               | 952783   | 861   | 11.6 (9.8, 13.3)  | 5.1 (4.2, 6)   | 1.3 (1, 1.6)   | 31 (27, 35)       | 125 (110, 141)      | 73 (58, 89)       | 34 (29, 40)       | 141 (124, 159)    | 81 (64, 99)      | 3.6 (3, 4.2)      | 14.5 (12.5, 16.6) | 8.4 (6.3, 10.5) |
| <b>Kyrgyzstan</b> |          |       |                   |                |                |                   |                     |                   |                   |                   |                  |                   |                   |                 |
| Age 25-69         | 1812720  | 2565  | 11.6 (10.7, 12.5) | 6.5 (5.9, 7)   | 0.7 (0.6, 0.9) | 109 (83, 142)     | 322 (266, 383)      | 91 (62, 123)      | 52 (40, 66)       | 148 (125, 173)    | 43 (30, 57)      | 4.3 (3.3, 5.2)    | 12.5 (10.6, 14.6) | 3.5 (2.5, 4.6)  |
| Age 70+           | 134684   | 4693  | 11.6 (9.9, 13.1)  | 6.2 (5.3, 7.1) | 0.7 (0.5, 0.9) | 133 (87, 193)     | 397 (301, 512)      | 98 (54, 152)      | 962 (637, 1393)   | 2885 (2231, 3662) | 708 (394, 1084)  | 2.8 (1.7, 3.9)    | 8.5 (6.2, 10.7)   | 2.1 (1, 3.1)    |
| Female            | 1035824  | 3938  | 11.7 (9.1, 14.2)  | 6.5 (4.9, 8)   | 0.7 (0.4, 1.1) | 123 (82, 183)     | 363 (269, 467)      | 96 (52, 147)      | 99 (67, 148)      | 290 (213, 372)    | 77 (41, 118)     | 3.1 (2.2, 4.1)    | 9.2 (7.4, 11.1)   | 2.4 (1.5, 3.3)  |
| Male              | 911580   | 3320  | 11.6 (9.1, 14.1)  | 6.4 (4.9, 8)   | 0.7 (0.4, 1.1) | 119 (87, 161)     | 356 (291, 427)      | 93 (59, 131)      | 134 (97, 183)     | 396 (323, 478)    | 103 (65, 147)    | 3.6 (2.5, 4.8)    | 10.7 (8.4, 13.1)  | 2.8 (1.7, 3.9)  |
| All               | 1947404  | 7261  | 11.6 (9.8, 13.4)  | 6.4 (5.3, 7.5) | 0.7 (0.5, 1)   | 242 (190, 310)    | 719 (603, 845)      | 189 (136, 249)    | 116 (90, 145)     | 341 (289, 401)    | 89 (64, 117)     | 3.3 (2.6, 4.1)    | 9.9 (8.5, 11.4)   | 2.6 (1.8, 3.4)  |
| <b>Laos</b>       |          |       |                   |                |                |                   |                     |                   |                   |                   |                  |                   |                   |                 |

|                  |         |       |                   |                 |                |                  |                   |                |                   |                   |                   |                   |                   |                 |
|------------------|---------|-------|-------------------|-----------------|----------------|------------------|-------------------|----------------|-------------------|-------------------|-------------------|-------------------|-------------------|-----------------|
| Age 25-69        | 1442394 | 1831  | 8 (7.2, 8.8)      | 2.9 (2.7, 3.1)  | 0.7 (0.6, 0.9) | 21 (15, 30)      | 361 (267, 453)    | 69 (45, 98)    | 14 (9, 19)        | 231 (174, 289)    | 45 (29, 62)       | 1.2 (0.9, 1.4)    | 19.7 (17.2, 22.1) | 3.8 (2.6, 4.9)  |
| Age 70+          | 84899   | 1430  | 7.9 (6.7, 9.4)    | 2.8 (2.4, 3.2)  | 0.7 (0.5, 0.9) | 11 (7, 16)       | 199 (141, 260)    | 33 (18, 52)    | 135 (84, 199)     | 2433 (1759, 3141) | 403 (220, 631)    | 0.8 (0.5, 1.1)    | 13.9 (11.1, 17.1) | 2.3 (1.1, 3.5)  |
| Female           | 784086  | 1665  | 8.1 (6.3, 9.9)    | 2.9 (2.1, 3.7)  | 0.8 (0.4, 1.1) | 16 (10, 23)      | 275 (200, 359)    | 51 (30, 74)    | 19 (13, 27)       | 336 (248, 436)    | 62 (38, 90)       | 1 (0.6, 1.3)      | 16.5 (13.7, 19.3) | 3 (1.8, 4.2)    |
| Male             | 743207  | 1596  | 7.9 (6.1, 9.6)    | 2.9 (2.1, 3.7)  | 0.7 (0.4, 1.1) | 17 (11, 23)      | 285 (217, 367)    | 52 (30, 76)    | 22 (15, 31)       | 374 (287, 476)    | 68 (40, 99)       | 1 (0.7, 1.4)      | 17.8 (14.5, 20.9) | 3.2 (1.9, 4.6)  |
| All              | 1527293 | 3265  | 8 (6.7, 9.3)      | 2.9 (2.3, 3.5)  | 0.7 (0.5, 1)   | 32 (24, 42)      | 560 (449, 674)    | 102 (73, 135)  | 20 (15, 26)       | 354 (287, 427)    | 65 (46, 85)       | 1 (0.8, 1.2)      | 17.2 (15.1, 19.2) | 3.1 (2.3, 4)    |
| <b>Latvia</b>    |         |       |                   |                 |                |                  |                   |                |                   |                   |                   |                   |                   |                 |
| Age 25-69        | 1510442 | 3455  | 15.3 (14.3, 16.4) | 4.1 (3.7, 4.4)  | 1.2 (1.1, 1.2) | 385 (317, 453)   | 588 (492, 683)    | 273 (238, 312) | 272 (223, 320)    | 416 (349, 483)    | 193 (168, 221)    | 11.2 (9.8, 12.5)  | 17 (15, 19)       | 7.9 (7.1, 8.6)  |
| Age 70+          | 212743  | 8700  | 15.4 (13.3, 17.4) | 3.9 (3.3, 4.5)  | 1.1 (1, 1.2)   | 686 (496, 877)   | 1012 (750, 1266)  | 413 (330, 502) | 3077 (2248, 3918) | 4548 (3401, 5657) | 1861 (1488, 2272) | 7.9 (6.1, 9.8)    | 11.6 (9, 14.1)    | 4.7 (3.8, 5.7)  |
| Female           | 967029  | 6744  | 15.4 (12.1, 18.7) | 4.1 (3, 5.1)    | 1.2 (0.8, 1.6) | 572 (401, 749)   | 825 (588, 1049)   | 351 (276, 438) | 747 (509, 979)    | 1076 (755, 1389)  | 455 (353, 575)    | 8.5 (7.2, 9.8)    | 12.2 (10.5, 13.9) | 5.2 (4.6, 5.9)  |
| Male             | 756156  | 5414  | 15.1 (11.9, 18.4) | 4 (3, 5)        | 1.2 (0.8, 1.6) | 499 (398, 604)   | 776 (624, 921)    | 335 (290, 386) | 765 (607, 932)    | 1191 (961, 1419)  | 511 (440, 594)    | 9.2 (7.6, 10.8)   | 14.3 (12, 16.6)   | 6.2 (5.4, 7)    |
| All              | 1723185 | 12159 | 15.3 (13, 17.6)   | 4 (3.3, 4.8)    | 1.2 (0.9, 1.4) | 1071 (868, 1272) | 1600 (1314, 1882) | 686 (597, 790) | 755 (602, 908)    | 1127 (912, 1332)  | 480 (414, 556)    | 8.8 (7.8, 9.8)    | 13.2 (11.7, 14.6) | 5.6 (5.1, 6.2)  |
| <b>Lebanon</b>   |         |       |                   |                 |                |                  |                   |                |                   |                   |                   |                   |                   |                 |
| Age 25-69        | 1187685 | 1601  | 10.9 (10.6, 11.2) | 8.2 (7.7, 8.8)  | 1.2 (1, 1.4)   | 52 (39, 70)      | 143 (114, 179)    | 134 (99, 170)  | 45 (34, 59)       | 122 (97, 151)     | 114 (86, 144)     | 3.2 (2.5, 4)      | 8.9 (7.5, 10.6)   | 8.3 (6.6, 10.1) |
| Age 70+          | 96464   | 2611  | 10.8 (10.4, 11.3) | 7.9 (7.1, 8.8)  | 1.1 (0.8, 1.4) | 58 (38, 84)      | 164 (120, 214)    | 133 (85, 186)  | 583 (381, 847)    | 1655 (1216, 2146) | 1343 (865, 1882)  | 2.2 (1.3, 3)      | 6.3 (4.4, 8)      | 5.1 (3.2, 6.9)  |
| Female           | 693599  | 1691  | 11 (8.6, 13.4)    | 8.3 (6.3, 10.2) | 1.2 (0.8, 1.6) | 46 (31, 66)      | 116 (84, 151)     | 104 (69, 143)  | 69 (48, 98)       | 174 (127, 227)    | 157 (106, 215)    | 2.7 (1.9, 3.5)    | 6.8 (5.3, 8.5)    | 6.1 (4.3, 7.8)  |
| Male             | 590550  | 2528  | 10.7 (8.3, 13)    | 8.1 (6.2, 10)   | 1.2 (0.8, 1.6) | 64 (45, 88)      | 192 (147, 243)    | 163 (116, 213) | 112 (79, 154)     | 335 (255, 424)    | 284 (202, 372)    | 2.5 (1.7, 3.3)    | 7.6 (5.9, 9.2)    | 6.4 (4.6, 8.3)  |
| All              | 1284149 | 4219  | 10.9 (9.2, 12.6)  | 8.2 (6.8, 9.6)  | 1.2 (0.9, 1.5) | 110 (85, 140)    | 307 (252, 368)    | 267 (205, 332) | 90 (70, 114)      | 250 (205, 300)    | 217 (167, 272)    | 2.6 (2, 3.2)      | 7.3 (6.2, 8.5)    | 6.3 (5, 7.6)    |
| <b>Lesotho</b>   |         |       |                   |                 |                |                  |                   |                |                   |                   |                   |                   |                   |                 |
| Age 25-69        | 550011  | 273   | 4.6 (4.3, 5)      | 3.5 (3.2, 3.7)  | 0.7 (0.5, 0.9) | 3 (2, 5)         | 49 (38, 59)       | 9 (5, 14)      | 5 (4, 7)          | 70 (56, 86)       | 12 (7, 19)        | 1.2 (0.9, 1.6)    | 17.9 (15.5, 20.3) | 3.2 (1.8, 4.3)  |
| Age 70+          | 40440   | 287   | 4.6 (3.9, 5.2)    | 3.3 (2.9, 3.8)  | 0.6 (0.3, 0.9) | 2 (2, 4)         | 37 (28, 47)       | 6 (2, 10)      | 62 (39, 94)       | 951 (720, 1219)   | 148 (62, 253)     | 0.8 (0.5, 1.2)    | 12.9 (10.1, 15.6) | 2 (0.8, 3.3)    |
| Female           | 336556  | 260   | 4.7 (3.6, 5.8)    | 3.5 (2.5, 4.4)  | 0.7 (0.4, 1)   | 3 (2, 4)         | 38 (29, 47)       | 7 (3, 11)      | 8 (5, 12)         | 118 (88, 147)     | 20 (10, 34)       | 1 (0.6, 1.4)      | 14.6 (11.8, 17.2) | 2.5 (1.2, 3.8)  |
| Male             | 253895  | 300   | 4.5 (3.5, 5.6)    | 3.4 (2.5, 4.3)  | 0.7 (0.3, 1)   | 3 (2, 5)         | 48 (37, 59)       | 8 (4, 13)      | 10 (7, 14)        | 149 (115, 184)    | 24 (12, 39)       | 1.1 (0.7, 1.5)    | 15.9 (12.8, 18.8) | 2.6 (1, 4.1)    |
| All              | 590451  | 559   | 4.6 (3.8, 5.4)    | 3.4 (2.8, 4.1)  | 0.7 (0.5, 0.9) | 6 (4, 7)         | 86 (72, 101)      | 14 (9, 21)     | 9 (7, 12)         | 133 (110, 155)    | 22 (14, 32)       | 1 (0.7, 1.3)      | 15.4 (13.4, 17.3) | 2.6 (1.6, 3.5)  |
| <b>Liberia</b>   |         |       |                   |                 |                |                  |                   |                |                   |                   |                   |                   |                   |                 |
| Age 25-69        | 713176  | 222   | 14 (12.9, 15)     | 2.7 (2.5, 2.9)  | 0.8 (0.7, 0.9) | 20 (16, 24)      | 44 (36, 53)       | 10 (7, 13)     | 26 (21, 32)       | 59 (48, 69)       | 13 (9, 17)        | 9 (7.7, 10.4)     | 20.1 (17.7, 22.7) | 4.5 (3.3, 5.7)  |
| Age 70+          | 29243   | 143   | 13.9 (12.1, 15.8) | 2.6 (2.3, 3)    | 0.7 (0.5, 1)   | 9 (7, 11)        | 20 (15, 26)       | 4 (2, 6)       | 314 (228, 407)    | 711 (527, 908)    | 135 (78, 203)     | 6.3 (4.9, 7.8)    | 14.1 (11.1, 17.2) | 2.7 (1.5, 3.9)  |
| Female           | 378905  | 214   | 14.1 (11.1, 17.2) | 2.7 (1.9, 3.5)  | 0.8 (0.5, 1.2) | 17 (13, 21)      | 37 (29, 45)       | 8 (5, 11)      | 46 (35, 56)       | 100 (77, 122)     | 21 (14, 30)       | 8 (6.4, 9.6)      | 17.4 (14.3, 20.3) | 3.8 (2.5, 5.1)  |
| Male             | 363514  | 148   | 13.9 (10.9, 16.9) | 2.7 (1.9, 3.5)  | 0.8 (0.4, 1.2) | 12 (9, 15)       | 28 (22, 33)       | 6 (4, 8)       | 31 (25, 37)       | 71 (58, 86)       | 15 (10, 21)       | 7.9 (6.1, 9.6)    | 18.5 (15.4, 21.9) | 3.8 (2.3, 5.3)  |
| All              | 742419  | 362   | 14 (11.8, 16.1)   | 2.7 (2.2, 3.3)  | 0.8 (0.6, 1.1) | 29 (24, 34)      | 65 (54, 75)       | 14 (10, 17)    | 38 (32, 45)       | 86 (72, 99)       | 18 (14, 23)       | 8 (6.8, 9.1)      | 17.8 (15.5, 20.1) | 3.8 (2.8, 4.8)  |
| <b>Libya</b>     |         |       |                   |                 |                |                  |                   |                |                   |                   |                   |                   |                   |                 |
| Age 25-69        | 1472192 | 1669  | 9.3 (8.6, 10.1)   | 5.9 (5.4, 6.4)  | 1.3 (1.1, 1.5) | 33 (24, 44)      | 235 (191, 284)    | 158 (118, 201) | 21 (16, 29)       | 153 (125, 184)    | 103 (77, 131)     | 2 (1.4, 2.5)      | 14.1 (12, 15.9)   | 9.5 (7.5, 11.7) |
| Age 70+          | 61146   | 1239  | 9.2 (8, 10.3)     | 5.7 (4.9, 6.4)  | 1.2 (0.8, 1.5) | 15 (10, 23)      | 120 (91, 154)     | 71 (46, 98)    | 262 (165, 403)    | 2050 (1560, 2640) | 1214 (792, 1694)  | 1.2 (0.7, 1.8)    | 9.6 (7.4, 12.1)   | 5.7 (3.6, 7.9)  |
| Female           | 684588  | 1158  | 9.4 (7.3, 11.5)   | 5.9 (4.5, 7.4)  | 1.3 (0.9, 1.7) | 18 (12, 26)      | 134 (104, 164)    | 88 (62, 116)   | 28 (19, 41)       | 207 (160, 256)    | 135 (95, 181)     | 1.6 (1, 2.2)      | 11.5 (9.2, 14)    | 7.7 (5.4, 9.9)  |
| Male             | 848750  | 1748  | 9.1 (7.1, 11.1)   | 5.8 (4.4, 7.2)  | 1.3 (0.8, 1.7) | 30 (20, 42)      | 221 (176, 272)    | 141 (101, 182) | 38 (26, 54)       | 287 (229, 352)    | 181 (131, 236)    | 1.7 (1, 2.4)      | 12.6 (10.2, 15.2) | 8.1 (5.7, 10.4) |
| All              | 1533338 | 2899  | 9.3 (7.8, 10.7)   | 5.9 (4.8, 6.9)  | 1.3 (1, 1.6)   | 48 (37, 62)      | 355 (298, 414)    | 229 (181, 280) | 33 (25, 43)       | 247 (208, 288)    | 158 (126, 194)    | 1.6 (1.2, 2.1)    | 12.2 (10.5, 13.9) | 7.9 (6.2, 9.6)  |
| <b>Lithuania</b> |         |       |                   |                 |                |                  |                   |                |                   |                   |                   |                   |                   |                 |
| Age 25-69        | 2051961 | 4064  | 16.2 (15.8, 16.6) | 4.4 (4.1, 4.8)  | 1.2 (1.1, 1.2) | 530 (441, 620)   | 664 (556, 772)    | 317 (275, 361) | 273 (227, 320)    | 341 (286, 399)    | 163 (142, 185)    | 13.1 (11.5, 14.6) | 16.3 (14.4, 18.2) | 7.8 (7, 8.5)    |
| Age 70+          | 255845  | 12509 | 16.3 (15.6, 17)   | 4.2 (3.6, 4.8)  | 1.1 (1, 1.2)   | 1138 (818, 1482) | 1378 (1003, 1767) | 589 (463, 721) | 4108 (2978, 5331) | 4972 (3640, 6400) | 2136 (1694, 2613) | 9.1 (6.9, 11.1)   | 11 (8.7, 13.4)    | 4.7 (3.9, 5.5)  |

|                   |         |       |                   |                |                |                   |                   |                 |                   |                   |                 |                   |                   |                |
|-------------------|---------|-------|-------------------|----------------|----------------|-------------------|-------------------|-----------------|-------------------|-------------------|-----------------|-------------------|-------------------|----------------|
| Female            | 1267345 | 9109  | 16.4 (12.9, 20)   | 4.4 (3.3, 5.6) | 1.2 (0.8, 1.6) | 887 (594, 1184)   | 1049 (713, 1386)  | 467 (361, 586)  | 942 (624, 1269)   | 1113 (749, 1491)  | 493 (377, 621)  | 9.7 (8.3, 11.3)   | 11.5 (9.8, 13.3)  | 5.1 (4.5, 5.7) |
| Male              | 1040461 | 7459  | 16 (12.6, 19.5)   | 4.3 (3.2, 5.5) | 1.1 (0.7, 1.5) | 781 (620, 958)    | 993 (795, 1204)   | 439 (373, 514)  | 854 (688, 1036)   | 1089 (889, 1313)  | 480 (409, 558)  | 10.5 (9, 12.2)    | 13.3 (11.2, 15.3) | 5.9 (5.1, 6.7) |
| All               | 2307806 | 16568 | 16.2 (13.8, 18.7) | 4.4 (3.6, 5.2) | 1.2 (0.9, 1.4) | 1668 (1339, 2023) | 2042 (1661, 2458) | 905 (772, 1042) | 903 (713, 1107)   | 1102 (878, 1338)  | 487 (411, 565)  | 10.1 (8.9, 11.2)  | 12.3 (11, 13.6)   | 5.5 (5, 5.9)   |
| <b>Luxembourg</b> |         |       |                   |                |                |                   |                   |                 |                   |                   |                 |                   |                   |                |
| Age 25-69         | 230248  | 223   | 7.3 (6.7, 7.9)    | 5 (4.7, 5.4)   | 1.1 (0.9, 1.3) | 4 (2, 5)          | 33 (26, 39)       | 16 (11, 21)     | 16 (11, 23)       | 149 (120, 176)    | 72 (52, 95)     | 1.6 (1.2, 2)      | 14.8 (13, 16.6)   | 7.2 (5.7, 8.6) |
| Age 70+           | 34123   | 598   | 7.3 (6.3, 8.3)    | 4.9 (4.2, 5.5) | 1 (0.8, 1.3)   | 6 (4, 9)          | 62 (47, 77)       | 27 (16, 39)     | 193 (117, 295)    | 1934 (1457, 2425) | 830 (497, 1225) | 1 (0.6, 1.5)      | 10.3 (8.1, 12.4)  | 4.5 (2.8, 6.2) |
| Female            | 137365  | 381   | 7.4 (5.7, 9.1)    | 5.1 (3.8, 6.3) | 1.1 (0.7, 1.5) | 4 (2, 7)          | 41 (28, 53)       | 19 (10, 29)     | 33 (18, 59)       | 326 (219, 426)    | 150 (77, 242)   | 1.1 (0.7, 1.4)    | 10.7 (9, 12.5)    | 4.9 (3.7, 6.3) |
| Male              | 127006  | 438   | 7.2 (5.6, 8.8)    | 5 (3.7, 6.2)   | 1.1 (0.7, 1.5) | 6 (4, 8)          | 54 (43, 65)       | 24 (17, 32)     | 50 (34, 72)       | 491 (391, 595)    | 215 (149, 291)  | 1.3 (0.8, 1.7)    | 12.3 (10.3, 14.3) | 5.4 (3.9, 6.9) |
| All               | 264371  | 820   | 7.3 (6.1, 8.5)    | 5 (4.1, 5.9)   | 1.1 (0.8, 1.4) | 10 (7, 13)        | 95 (78, 110)      | 43 (30, 57)     | 42 (30, 58)       | 407 (332, 479)    | 182 (128, 244)  | 1.2 (0.9, 1.5)    | 11.6 (10.2, 12.9) | 5.2 (4.2, 6.2) |
| <b>Macedonia</b>  |         |       |                   |                |                |                   |                   |                 |                   |                   |                 |                   |                   |                |
| Age 25-69         | 1012750 | 1307  | 14.7 (13.6, 15.9) | 7.9 (7.3, 8.6) | 0.9 (0.8, 0.9) | 123 (96, 152)     | 123 (97, 152)     | 65 (55, 75)     | 135 (105, 167)    | 135 (106, 167)    | 71 (60, 82)     | 9.4 (7.8, 11)     | 9.4 (7.9, 11.1)   | 5 (4.4, 5.6)   |
| Age 70+           | 81103   | 1766  | 14.6 (12.9, 16.4) | 7.6 (6.6, 8.7) | 0.8 (0.7, 0.9) | 117 (85, 156)     | 117 (85, 156)     | 53 (43, 64)     | 1391 (1019, 1833) | 1394 (1021, 1835) | 635 (512, 775)  | 6.6 (4.7, 8.6)    | 6.6 (4.7, 8.5)    | 3 (2.3, 3.6)   |
| Female            | 553801  | 1239  | 14.8 (11.6, 18)   | 8 (6.1, 9.9)   | 0.9 (0.5, 1.3) | 91 (66, 119)      | 91 (66, 119)      | 46 (37, 55)     | 237 (164, 323)    | 237 (164, 323)    | 118 (93, 145)   | 7.4 (5.8, 9)      | 7.3 (5.7, 8.9)    | 3.7 (3.1, 4.3) |
| Male              | 540052  | 1835  | 14.5 (11.4, 17.7) | 7.8 (6, 9.7)   | 0.9 (0.5, 1.2) | 149 (114, 185)    | 150 (115, 186)    | 72 (60, 85)     | 327 (248, 409)    | 328 (249, 411)    | 156 (130, 184)  | 8.1 (6.2, 9.9)    | 8.2 (6.4, 9.9)    | 3.9 (3.3, 4.5) |
| All               | 1093853 | 3069  | 14.7 (12.4, 16.9) | 7.9 (6.6, 9.2) | 0.9 (0.6, 1.1) | 240 (197, 284)    | 241 (197, 285)    | 118 (103, 133)  | 281 (226, 338)    | 282 (227, 339)    | 137 (119, 156)  | 7.8 (6.6, 9.1)    | 7.8 (6.5, 9.1)    | 3.8 (3.4, 4.3) |
| <b>Madagascar</b> |         |       |                   |                |                |                   |                   |                 |                   |                   |                 |                   |                   |                |
| Age 25-69         | 3789565 | 3136  | 10 (9.2, 10.8)    | 3.6 (3.4, 3.9) | 0.7 (0.5, 0.8) | 45 (34, 56)       | 592 (515, 685)    | 93 (64, 125)    | 11 (9, 14)        | 150 (131, 172)    | 24 (17, 32)     | 1.4 (1.1, 1.8)    | 18.9 (16.5, 21.3) | 3 (2.1, 3.8)   |
| Age 70+           | 206677  | 2138  | 9.9 (8.7, 11.3)   | 3.5 (3, 4)     | 0.6 (0.4, 0.8) | 19 (13, 27)       | 269 (213, 331)    | 36 (19, 55)     | 91 (60, 129)      | 1291 (1024, 1592) | 172 (95, 265)   | 0.9 (0.5, 1.2)    | 12.6 (10, 15.1)   | 1.7 (0.8, 2.5) |
| Female            | 1997458 | 2190  | 10.1 (7.9, 12.3)  | 3.7 (2.7, 4.7) | 0.7 (0.3, 1)   | 26 (19, 35)       | 341 (284, 404)    | 53 (35, 74)     | 13 (10, 18)       | 173 (144, 207)    | 27 (18, 38)     | 1.2 (0.8, 1.6)    | 15.6 (12.8, 18.2) | 2.4 (1.4, 3.4) |
| Male              | 1998784 | 3081  | 9.9 (7.8, 12.1)   | 3.6 (2.6, 4.5) | 0.6 (0.3, 1)   | 37 (28, 49)       | 520 (436, 605)    | 75 (50, 107)    | 18 (13, 23)       | 248 (209, 287)    | 36 (24, 51)     | 1.2 (0.8, 1.6)    | 16.9 (14.1, 19.8) | 2.4 (1.4, 3.6) |
| All               | 3996242 | 5262  | 10 (8.5, 11.6)    | 3.6 (2.9, 4.3) | 0.6 (0.4, 0.9) | 64 (51, 77)       | 861 (760, 977)    | 128 (96, 164)   | 16 (13, 19)       | 210 (186, 237)    | 31 (24, 40)     | 1.2 (0.9, 1.5)    | 16.4 (14.3, 18.3) | 2.4 (1.7, 3.1) |
| <b>Malawi</b>     |         |       |                   |                |                |                   |                   |                 |                   |                   |                 |                   |                   |                |
| Age 25-69         | 3175633 | 2062  | 7.3 (6.7, 7.9)    | 3.7 (3.4, 4)   | 0.6 (0.5, 0.8) | 29 (22, 39)       | 387 (315, 467)    | 57 (38, 79)     | 10 (7, 13)        | 130 (106, 159)    | 19 (13, 27)     | 1.4 (1, 1.8)      | 18.8 (16.4, 21.4) | 2.8 (1.9, 3.8) |
| Age 70+           | 140104  | 1282  | 7.2 (6.3, 8.2)    | 3.6 (3.1, 4.1) | 0.6 (0.4, 0.8) | 12 (7, 18)        | 167 (123, 215)    | 20 (9, 35)      | 86 (56, 128)      | 1233 (923, 1581)  | 149 (71, 257)   | 0.9 (0.5, 1.3)    | 13 (10.1, 15.9)   | 1.6 (0.8, 2.5) |
| Female            | 1743030 | 1847  | 7.4 (5.7, 9)      | 3.7 (2.7, 4.7) | 0.6 (0.3, 1)   | 22 (15, 31)       | 298 (234, 377)    | 43 (25, 65)     | 15 (10, 21)       | 200 (157, 254)    | 29 (16, 44)     | 1.2 (0.8, 1.7)    | 16.1 (13.3, 19.3) | 2.3 (1.2, 3.4) |
| Male              | 1572707 | 1499  | 7.2 (5.6, 8.9)    | 3.7 (2.7, 4.6) | 0.6 (0.3, 0.9) | 19 (14, 25)       | 256 (210, 303)    | 34 (21, 49)     | 13 (9, 17)        | 176 (145, 210)    | 23 (15, 34)     | 1.3 (0.8, 1.7)    | 17.1 (13.9, 20.5) | 2.3 (1.2, 3.6) |
| All               | 3315737 | 3350  | 7.3 (6.1, 8.5)    | 3.7 (3, 4.4)   | 0.6 (0.4, 0.9) | 41 (32, 52)       | 554 (469, 646)    | 78 (56, 102)    | 14 (11, 18)       | 188 (160, 220)    | 26 (18, 35)     | 1.2 (0.9, 1.5)    | 16.5 (14.4, 18.7) | 2.3 (1.5, 3.1) |
| <b>Malaysia</b>   |         |       |                   |                |                |                   |                   |                 |                   |                   |                 |                   |                   |                |
| Age 25-69         | 7556375 | 6670  | 21.5 (19.9, 23.3) | 2.5 (2.3, 2.7) | 1 (0.9, 1.2)   | 1333 (1123, 1552) | 1333 (1123, 1552) | 442 (337, 566)  | 215 (182, 253)    | 215 (182, 253)    | 71 (54, 91)     | 20 (17.5, 22.3)   | 20 (17.6, 22.3)   | 6.6 (5.2, 8)   |
| Age 70+           | 396702  | 7232  | 21.4 (18.8, 24.2) | 2.4 (2.1, 2.8) | 1 (0.8, 1.2)   | 1033 (821, 1263)  | 1033 (821, 1263)  | 300 (202, 406)  | 2548 (2020, 3116) | 2548 (2020, 3116) | 742 (495, 1011) | 14.3 (11.1, 17.3) | 14.3 (11.1, 17.3) | 4.2 (2.7, 5.6) |
| Female            | 3940990 | 5823  | 21.7 (17.1, 26.3) | 2.5 (1.8, 3.3) | 1.1 (0.7, 1.4) | 945 (758, 1150)   | 945 (758, 1150)   | 300 (215, 399)  | 271 (217, 329)    | 271 (217, 329)    | 86 (61, 114)    | 16.2 (13.6, 18.7) | 16.2 (13.6, 18.8) | 5.1 (3.6, 6.6) |
| Male              | 4012087 | 8064  | 21.3 (16.8, 25.9) | 2.4 (1.7, 3.1) | 1 (0.6, 1.4)   | 1421 (1180, 1670) | 1421 (1180, 1670) | 442 (321, 566)  | 416 (344, 490)    | 416 (344, 490)    | 130 (93, 168)   | 17.6 (14.8, 20.6) | 17.6 (15, 20.2)   | 5.5 (3.8, 7)   |
| All               | 7953077 | 13872 | 21.5 (18.3, 24.7) | 2.5 (2, 3)     | 1 (0.8, 1.3)   | 2366 (2066, 2710) | 2366 (2066, 2710) | 742 (586, 899)  | 344 (300, 394)    | 344 (300, 394)    | 108 (85, 131)   | 17.1 (15.1, 18.9) | 17.1 (15.1, 19.1) | 5.3 (4.2, 6.4) |
| <b>Maldives</b>   |         |       |                   |                |                |                   |                   |                 |                   |                   |                 |                   |                   |                |
| Age 25-69         | 71713   | 28    | 18.9 (17.4, 20.4) | 1.8 (1.6, 2.1) | 1 (0.8, 1.2)   | 5 (4, 7)          | 6 (5, 8)          | 2 (1, 3)        | 60 (47, 74)       | 68 (54, 84)       | 21 (14, 29)     | 18.5 (16.2, 21)   | 21.3 (18.5, 23.7) | 6.3 (4.6, 7.8) |
| Age 70+           | 3441    | 25    | 18.8 (16.4, 21.2) | 1.8 (1.4, 2.1) | 0.9 (0.6, 1.2) | 3 (2, 4)          | 4 (3, 5)          | 1 (1, 2)        | 1035 (737, 1351)  | 1177 (836, 1532)  | 306 (176, 481)  | 13.5 (10.7, 16.2) | 15.2 (11.9, 18.4) | 4 (2.1, 5.8)   |
| Female            | 35287   | 22    | 19.3 (15.2, 23.4) | 1.9 (1.2, 2.5) | 1 (0.6, 1.4)   | 4 (3, 5)          | 4 (3, 5)          | 1 (1, 2)        | 124 (90, 163)     | 137 (99, 180)     | 39 (23, 58)     | 16.8 (13.9, 19.5) | 18.5 (15.3, 21.6) | 5.4 (3.4, 7.5) |
| Male              | 39867   | 32    | 18.7 (14.7, 22.6) | 1.8 (1.2, 2.4) | 1 (0.6, 1.4)   | 5 (4, 6)          | 6 (4, 7)          | 2 (1, 2)        | 130 (98, 168)     | 153 (115, 197)    | 41 (26, 59)     | 15.7 (13.1, 18.3) | 18.4 (15.1, 21.5) | 5.1 (3.2, 7.1) |





|                   |          |       |                   |                |                |                   |                   |                |                   |                   |                  |                   |                   |                |
|-------------------|----------|-------|-------------------|----------------|----------------|-------------------|-------------------|----------------|-------------------|-------------------|------------------|-------------------|-------------------|----------------|
| Age 25-69         | 2303507  | 4398  | 11.5 (10.6, 12.3) | 6.9 (6.4, 7.4) | 0.9 (0.8, 1.1) | 161 (118, 214)    | 485 (385, 593)    | 234 (160, 321) | 74 (55, 97)       | 224 (181, 270)    | 108 (74, 146)    | 3.7 (2.9, 4.5)    | 11 (9.4, 12.7)    | 5.3 (4.1, 6.5) |
| Age 70+           | 209581   | 9902  | 11.4 (10, 12.9)   | 6.6 (5.8, 7.4) | 0.9 (0.6, 1.1) | 269 (175, 392)    | 792 (590, 1003)   | 334 (192, 493) | 1314 (838, 1931)  | 3862 (2835, 4966) | 1629 (912, 2450) | 2.7 (1.7, 3.7)    | 8 (6, 9.9)        | 3.4 (1.9, 4.9) |
| Female            | 1370367  | 8068  | 11.6 (9, 14.1)    | 6.9 (5.3, 8.6) | 0.9 (0.6, 1.3) | 246 (159, 358)    | 690 (502, 886)    | 308 (177, 456) | 242 (149, 367)    | 675 (466, 900)    | 298 (160, 465)   | 3 (2.2, 3.8)      | 8.5 (6.8, 10.2)   | 3.8 (2.6, 5)   |
| Male              | 1142721  | 6238  | 11.4 (8.9, 13.8)  | 6.8 (5.1, 8.4) | 0.9 (0.6, 1.3) | 184 (130, 252)    | 588 (465, 720)    | 260 (172, 356) | 199 (138, 278)    | 636 (497, 788)    | 279 (177, 391)   | 2.9 (2.1, 3.9)    | 9.4 (7.6, 11.2)   | 4.2 (2.8, 5.5) |
| All               | 2513088  | 14310 | 11.5 (9.7, 13.2)  | 6.8 (5.7, 8)   | 0.9 (0.7, 1.2) | 430 (326, 561)    | 1278 (1066, 1518) | 568 (408, 749) | 222 (164, 299)    | 657 (530, 795)    | 289 (200, 394)   | 3 (2.4, 3.6)      | 8.9 (7.7, 10.1)   | 4 (3.1, 4.8)   |
| <b>Mongolia</b>   |          |       |                   |                |                |                   |                   |                |                   |                   |                  |                   |                   |                |
| Age 25-69         | 788583   | 1090  | 14 (12.9, 15.1)   | 4.4 (4, 4.8)   | 0.7 (0.6, 0.9) | 98 (80, 118)      | 183 (153, 216)    | 39 (26, 53)    | 112 (91, 134)     | 207 (173, 242)    | 44 (30, 60)      | 9 (7.5, 10.4)     | 16.8 (14.4, 19.1) | 3.5 (2.4, 4.7) |
| Age 70+           | 58418    | 1744  | 13.9 (12.2, 15.7) | 4.2 (3.6, 4.8) | 0.7 (0.4, 0.9) | 107 (79, 139)     | 199 (151, 249)    | 35 (18, 55)    | 1839 (1356, 2389) | 3400 (2583, 4270) | 588 (302, 929)   | 6.2 (4.6, 7.7)    | 11.4 (8.8, 14)    | 2 (0.9, 3.1)   |
| Female            | 435355   | 1343  | 14.3 (11.2, 17.3) | 4.4 (3.3, 5.6) | 0.7 (0.4, 1.1) | 99 (74, 126)      | 175 (135, 216)    | 33 (19, 51)    | 192 (146, 243)    | 338 (266, 418)    | 64 (39, 98)      | 7.4 (5.8, 8.9)    | 13 (10.7, 15.5)   | 2.5 (1.4, 3.5) |
| Male              | 411646   | 1485  | 13.8 (10.8, 16.8) | 4.4 (3.3, 5.5) | 0.7 (0.4, 1)   | 106 (84, 130)     | 207 (168, 246)    | 40 (24, 58)    | 207 (165, 252)    | 398 (331, 472)    | 80 (50, 114)     | 7.1 (5.5, 8.7)    | 13.9 (11.5, 16.3) | 2.7 (1.5, 4)   |
| All               | 847001   | 2829  | 14 (11.9, 16.2)   | 4.4 (3.6, 5.2) | 0.7 (0.5, 1)   | 205 (171, 242)    | 382 (326, 442)    | 73 (52, 98)    | 199 (167, 234)    | 367 (317, 422)    | 72 (52, 94)      | 7.2 (6.1, 8.3)    | 13.5 (11.9, 15)   | 2.6 (1.8, 3.4) |
| <b>Montenegro</b> |          |       |                   |                |                |                   |                   |                |                   |                   |                  |                   |                   |                |
| Age 25-69         | 321953   | 350   | 8.7 (7.9, 9.4)    | 5.4 (5, 5.8)   | 1.1 (1, 1.3)   | 6 (4, 9)          | 52 (42, 63)       | 26 (19, 35)    | 21 (14, 30)       | 175 (139, 211)    | 88 (64, 117)     | 1.8 (1.3, 2.3)    | 14.9 (13, 16.8)   | 7.5 (5.9, 9.1) |
| Age 70+           | 31754    | 542   | 8.7 (7.6, 9.8)    | 5.2 (4.4, 5.9) | 1 (0.8, 1.3)   | 6 (3, 10)         | 54 (38, 70)       | 24 (14, 36)    | 169 (101, 278)    | 1523 (1098, 1950) | 688 (413, 985)   | 1.1 (0.6, 1.6)    | 9.9 (7.6, 12.2)   | 4.4 (2.7, 6.1) |
| Female            | 182219   | 269   | 8.8 (6.8, 10.7)   | 5.4 (4.1, 6.7) | 1.1 (0.7, 1.5) | 3 (2, 6)          | 29 (21, 39)       | 14 (8, 21)     | 22 (13, 37)       | 190 (137, 248)    | 91 (54, 136)     | 1.3 (0.8, 1.6)    | 10.8 (9.2, 12.5)  | 5.2 (3.8, 6.6) |
| Male              | 171488   | 625   | 8.6 (6.7, 10.5)   | 5.3 (4, 6.6)   | 1.1 (0.7, 1.5) | 9 (6, 13)         | 77 (60, 93)       | 36 (26, 49)    | 63 (42, 92)       | 542 (425, 657)    | 257 (180, 345)   | 1.4 (1, 1.9)      | 12.3 (10.4, 14.4) | 5.8 (4.2, 7.6) |
| All               | 353707   | 893   | 8.7 (7.3, 10)     | 5.4 (4.4, 6.3) | 1.1 (0.8, 1.4) | 12 (9, 17)        | 106 (87, 126)     | 50 (38, 65)    | 41 (30, 58)       | 358 (295, 425)    | 170 (125, 215)   | 1.4 (1.1, 1.7)    | 11.9 (10.5, 13.2) | 5.6 (4.5, 6.7) |
| <b>Morocco</b>    |          |       |                   |                |                |                   |                   |                |                   |                   |                  |                   |                   |                |
| Age 25-69         | 9336338  | 5825  | 9.2 (8.4, 9.9)    | 5.9 (5.4, 6.4) | 0.8 (0.8, 0.9) | 113 (80, 154)     | 813 (662, 978)    | 273 (223, 325) | 13 (9, 17)        | 91 (74, 109)      | 31 (25, 36)      | 1.9 (1.4, 2.5)    | 14 (12, 15.9)     | 4.7 (4, 5.3)   |
| Age 70+           | 593427   | 6389  | 9.1 (7.9, 10.2)   | 5.7 (4.9, 6.4) | 0.8 (0.7, 0.9) | 78 (49, 123)      | 614 (452, 788)    | 178 (134, 228) | 133 (83, 209)     | 1050 (775, 1341)  | 305 (231, 390)   | 1.2 (0.7, 1.8)    | 9.6 (7.3, 11.9)   | 2.8 (2.1, 3.4) |
| Female            | 5106237  | 5342  | 9.3 (7.2, 11.3)   | 5.9 (4.5, 7.4) | 0.9 (0.5, 1.2) | 82 (56, 119)      | 608 (477, 772)    | 199 (157, 246) | 18 (12, 27)       | 135 (104, 173)    | 44 (34, 54)      | 1.5 (1, 2.1)      | 11.4 (9.2, 13.5)  | 3.7 (3, 4.4)   |
| Male              | 4823528  | 6927  | 9 (7, 11)         | 5.8 (4.4, 7.3) | 0.8 (0.5, 1.2) | 109 (75, 158)     | 818 (643, 1023)   | 251 (197, 308) | 24 (16, 34)       | 180 (140, 223)    | 55 (43, 68)      | 1.6 (1, 2.1)      | 11.8 (9.6, 14.1)  | 3.6 (2.9, 4.3) |
| All               | 9929765  | 12210 | 9.2 (7.7, 10.6)   | 5.9 (4.9, 6.9) | 0.8 (0.6, 1.1) | 191 (145, 250)    | 1426 (1200, 1686) | 451 (383, 527) | 21 (16, 27)       | 156 (132, 184)    | 49 (42, 57)      | 1.6 (1.2, 2)      | 11.7 (10.1, 13.2) | 3.7 (3.2, 4.2) |
| <b>Mozambique</b> |          |       |                   |                |                |                   |                   |                |                   |                   |                  |                   |                   |                |
| Age 25-69         | 4359955  | 899   | 13.7 (12.7, 14.8) | 4.5 (4.1, 4.9) | 0.6 (0.5, 0.7) | 71 (55, 89)       | 144 (116, 174)    | 22 (14, 32)    | 15 (11, 18)       | 29 (24, 36)       | 5 (3, 7)         | 8 (6.7, 9.2)      | 16 (14, 18.1)     | 2.5 (1.6, 3.4) |
| Age 70+           | 242834   | 861   | 13.6 (11.7, 15.6) | 4.4 (3.7, 5)   | 0.6 (0.4, 0.8) | 50 (36, 67)       | 100 (74, 129)     | 13 (6, 22)     | 213 (154, 283)    | 428 (319, 551)    | 57 (26, 95)      | 5.8 (4.2, 7.4)    | 11.6 (8.8, 14.6)  | 1.6 (0.6, 2.5) |
| Female            | 2563912  | 955   | 13.8 (10.9, 16.8) | 4.5 (3.4, 5.7) | 0.6 (0.3, 0.9) | 66 (50, 86)       | 128 (99, 161)     | 19 (10, 30)    | 25 (19, 33)       | 49 (38, 62)       | 7 (4, 11)        | 6.9 (5.5, 8.4)    | 13.4 (11.1, 15.8) | 2 (1, 2.9)     |
| Male              | 2038877  | 803   | 13.5 (10.6, 16.4) | 4.5 (3.4, 5.7) | 0.6 (0.3, 0.9) | 55 (41, 70)       | 116 (90, 143)     | 17 (10, 26)    | 25 (19, 32)       | 52 (41, 64)       | 8 (4, 11)        | 6.8 (5.2, 8.3)    | 14.5 (11.6, 17.1) | 2.1 (1, 3.2)   |
| All               | 4602789  | 1761  | 13.7 (11.6, 15.8) | 4.5 (3.7, 5.4) | 0.6 (0.4, 0.9) | 121 (100, 145)    | 244 (205, 286)    | 36 (25, 49)    | 25 (21, 30)       | 51 (42, 59)       | 7 (5, 10)        | 6.9 (5.9, 8)      | 13.9 (12.1, 15.6) | 2 (1.3, 2.8)   |
| <b>Myanmar</b>    |          |       |                   |                |                |                   |                   |                |                   |                   |                  |                   |                   |                |
| Age 25-69         | 15916130 | 9106  | 16.1 (14.9, 17.3) | 5.2 (4.7, 5.6) | 0.7 (0.6, 0.9) | 1160 (865, 1483)  | 1331 (994, 1702)  | 308 (197, 440) | 73 (55, 91)       | 83 (62, 103)      | 19 (12, 27)      | 12.8 (11.1, 14.5) | 14.6 (12.6, 16.5) | 3.4 (2.4, 4.3) |
| Age 70+           | 1001729  | 9855  | 16 (14.1, 18)     | 5 (4.2, 5.8)   | 0.7 (0.5, 0.9) | 912 (641, 1263)   | 1041 (744, 1426)  | 215 (116, 337) | 950 (672, 1303)   | 1081 (762, 1472)  | 222 (121, 352)   | 9.3 (7.2, 11.4)   | 10.6 (7.9, 13)    | 2.2 (1.2, 3.2) |
| Female            | 8655447  | 11561 | 16.3 (12.8, 19.7) | 5.2 (3.9, 6.5) | 0.7 (0.4, 1.1) | 1261 (936, 1679)  | 1402 (1049, 1849) | 320 (178, 483) | 145 (107, 191)    | 160 (119, 209)    | 37 (21, 54)      | 10.9 (8.9, 12.9)  | 12.1 (10, 14.3)   | 2.8 (1.7, 3.8) |
| Male              | 8262412  | 7289  | 16 (12.5, 19.4)   | 5 (3.8, 6.3)   | 0.7 (0.4, 1.1) | 812 (590, 1063)   | 970 (711, 1259)   | 203 (122, 302) | 100 (73, 129)     | 118 (87, 152)     | 25 (15, 37)      | 11.1 (8.9, 13.2)  | 13.3 (10.8, 15.5) | 2.8 (1.7, 3.9) |
| All               | 16917859 | 18875 | 16.1 (13.7, 18.5) | 5.1 (4.2, 6)   | 0.7 (0.5, 1)   | 2073 (1663, 2552) | 2372 (1921, 2887) | 523 (359, 710) | 123 (99, 149)     | 140 (114, 170)    | 31 (21, 41)      | 11 (9.6, 12.6)    | 12.6 (11, 14.1)   | 2.8 (2, 3.6)   |
| <b>Namibia</b>    |          |       |                   |                |                |                   |                   |                |                   |                   |                  |                   |                   |                |
| Age 25-69         | 477765   | 251   | 6.4 (5.9, 6.9)    | 3.7 (3.3, 4)   | 0.9 (0.7, 1)   | 3 (2, 4)          | 45 (36, 55)       | 12 (8, 17)     | 7 (5, 9)          | 90 (72, 109)      | 25 (16, 34)      | 1.3 (1, 1.6)      | 17.9 (15.4, 20.3) | 4.9 (3.5, 6.3) |
| Age 70+           | 27569    | 239   | 6.3 (5.5, 7.1)    | 3.5 (3.1, 4)   | 0.8 (0.5, 1.1) | 2 (1, 3)          | 30 (23, 39)       | 7 (4, 11)      | 78 (49, 113)      | 1144 (863, 1441)  | 273 (154, 419)   | 0.9 (0.5, 1.3)    | 12.7 (9.9, 15.5)  | 3.1 (1.5, 4.6) |

|                    |          |       |                   |                |                |                   |                   |                   |                   |                   |                   |                  |                   |                   |
|--------------------|----------|-------|-------------------|----------------|----------------|-------------------|-------------------|-------------------|-------------------|-------------------|-------------------|------------------|-------------------|-------------------|
| Female             | 268397   | 231   | 6.4 (5, 7.9)      | 3.7 (2.7, 4.7) | 0.9 (0.5, 1.3) | 2 (2, 3)          | 34 (26, 42)       | 9 (5, 13)         | 9 (6, 13)         | 125 (97, 158)     | 33 (20, 48)       | 1.1 (0.7, 1.4)   | 14.5 (12.2, 17)   | 3.8 (2.3, 5.4)    |
| Male               | 236937   | 260   | 6.3 (4.9, 7.8)    | 3.6 (2.6, 4.5) | 0.9 (0.5, 1.2) | 3 (2, 4)          | 42 (33, 51)       | 11 (7, 15)        | 12 (8, 16)        | 164 (131, 199)    | 42 (27, 60)       | 1.1 (0.7, 1.5)   | 16.1 (13.4, 19)   | 4.2 (2.4, 5.9)    |
| All                | 505334   | 490   | 6.4 (5.3, 7.4)    | 3.6 (3, 4.3)   | 0.9 (0.6, 1.1) | 5 (4, 7)          | 75 (64, 88)       | 20 (14, 25)       | 10 (8, 13)        | 144 (121, 166)    | 37 (28, 48)       | 1.1 (0.8, 1.4)   | 15.4 (13.6, 17.2) | 4 (2.8, 5.1)      |
| <b>Nepal</b>       |          |       |                   |                |                |                   |                   |                   |                   |                   |                   |                  |                   |                   |
| Age 25-69          | 6962128  | 3132  | 2.7 (2.5, 2.9)    | 3.5 (3.2, 3.8) | 1.8 (1.5, 2.1) | 42 (31, 57)       | 594 (487, 718)    | 484 (376, 607)    | 6 (4, 8)          | 82 (68, 99)       | 67 (52, 84)       | 1.3 (1, 1.7)     | 19 (16.6, 21.5)   | 15.4 (12.4, 18.3) |
| Age 70+            | 347872   | 2284  | 2.7 (2.3, 3)      | 3.4 (2.9, 3.9) | 1.7 (1.2, 2.2) | 20 (13, 29)       | 297 (217, 384)    | 224 (144, 321)    | 57 (37, 86)       | 869 (633, 1122)   | 655 (424, 939)    | 0.9 (0.5, 1.2)   | 13 (10.3, 15.8)   | 9.8 (6.5, 13)     |
| Female             | 3699089  | 2544  | 2.7 (2, 3.4)      | 3.5 (2.6, 4.5) | 1.9 (1.3, 2.4) | 28 (19, 39)       | 399 (305, 503)    | 326 (234, 428)    | 8 (5, 11)         | 116 (88, 146)     | 94 (66, 125)      | 1.1 (0.7, 1.5)   | 15.7 (13.3, 18.4) | 12.8 (9.3, 16)    |
| Male               | 3610911  | 2883  | 2.6 (2, 3.3)      | 3.5 (2.5, 4.4) | 1.8 (1.3, 2.3) | 34 (24, 46)       | 492 (397, 594)    | 383 (284, 485)    | 10 (7, 13)        | 138 (111, 166)    | 107 (79, 135)     | 1.2 (0.8, 1.6)   | 17.1 (14.1, 20.1) | 13.2 (9.7, 16.9)  |
| All                | 7310000  | 5420  | 2.7 (2.2, 3.2)    | 3.5 (2.8, 4.2) | 1.8 (1.5, 2.2) | 62 (48, 77)       | 891 (754, 1037)   | 708 (579, 856)    | 9 (7, 11)         | 126 (107, 146)    | 100 (81, 120)     | 1.1 (0.9, 1.4)   | 16.4 (14.5, 18.4) | 13.1 (10.8, 15.4) |
| <b>Netherlands</b> |          |       |                   |                |                |                   |                   |                   |                   |                   |                   |                  |                   |                   |
| Age 25-69          | 8589392  | 8390  | 14.6 (14.4, 14.9) | 6.9 (6.7, 7)   | 2.7 (2.6, 2.7) | 798 (643, 947)    | 943 (757, 1116)   | 1852 (1636, 2082) | 116 (93, 138)     | 137 (109, 163)    | 269 (236, 303)    | 9.5 (8.3, 10.7)  | 11.2 (10, 12.6)   | 22.1 (20.5, 23.6) |
| Age 70+            | 1291204  | 22587 | 14.6 (14.2, 15)   | 6.6 (6.4, 6.8) | 2.4 (2.3, 2.6) | 1545 (1165, 1934) | 1818 (1383, 2264) | 3239 (2757, 3763) | 1270 (949, 1599)  | 1498 (1123, 1875) | 2659 (2245, 3096) | 6.8 (5.4, 8.3)   | 8 (6.2, 9.8)      | 14.4 (12.6, 16.4) |
| Female             | 5081221  | 13806 | 14.8 (11.6, 18)   | 6.9 (5.2, 8.6) | 2.7 (2, 3.3)   | 1019 (727, 1331)  | 1139 (813, 1485)  | 2118 (1722, 2586) | 234 (163, 309)    | 262 (182, 345)    | 485 (391, 594)    | 7.4 (6.3, 8.5)   | 8.3 (7, 9.5)      | 15.3 (14, 16.7)   |
| Male               | 4799375  | 17126 | 14.5 (11.4, 17.6) | 6.8 (5.1, 8.4) | 2.6 (2, 3.2)   | 1325 (1063, 1590) | 1621 (1306, 1937) | 2974 (2631, 3357) | 354 (282, 428)    | 434 (347, 522)    | 793 (699, 900)    | 7.7 (6.5, 8.9)   | 9.5 (8.1, 10.9)   | 17.4 (15.8, 19)   |
| All                | 9880596  | 30955 | 14.6 (12.4, 16.9) | 6.8 (5.7, 8)   | 2.6 (2.2, 3.1) | 2343 (1940, 2758) | 2760 (2285, 3244) | 5092 (4553, 5662) | 293 (241, 347)    | 346 (285, 409)    | 636 (566, 707)    | 7.6 (6.7, 8.4)   | 8.9 (7.9, 9.9)    | 16.5 (15.3, 17.5) |
| <b>New Zealand</b> |          |       |                   |                |                |                   |                   |                   |                   |                   |                   |                  |                   |                   |
| Age 25-69          | 1790300  | 2242  | 15.3 (15.1, 15.5) | 4.7 (4.6, 4.7) | 1.2 (1.2, 1.3) | 241 (198, 284)    | 345 (284, 406)    | 183 (157, 210)    | 154 (127, 182)    | 221 (182, 260)    | 117 (100, 134)    | 10.8 (9.4, 12.1) | 15.4 (13.9, 17.1) | 8.2 (7.4, 8.9)    |
| Age 70+            | 249382   | 5371  | 15.3 (15, 15.7)   | 4.5 (4.4, 4.6) | 1.1 (1.1, 1.2) | 424 (326, 524)    | 589 (454, 723)    | 283 (233, 339)    | 1874 (1416, 2328) | 2604 (1989, 3222) | 1243 (1011, 1503) | 7.9 (6.3, 9.4)   | 11 (8.8, 13.1)    | 5.3 (4.5, 6.1)    |
| Female             | 1055655  | 3339  | 15.5 (12.2, 18.8) | 4.7 (3.5, 5.9) | 1.2 (0.8, 1.7) | 286 (204, 368)    | 380 (273, 486)    | 194 (157, 237)    | 310 (214, 406)    | 411 (288, 534)    | 209 (167, 260)    | 8.6 (7.4, 9.9)   | 11.4 (9.7, 13)    | 5.8 (5.1, 6.5)    |
| Male               | 984027   | 4271  | 15.1 (11.8, 18.3) | 4.6 (3.4, 5.8) | 1.2 (0.8, 1.6) | 379 (305, 450)    | 554 (447, 656)    | 272 (234, 313)    | 484 (384, 588)    | 706 (563, 853)    | 344 (293, 399)    | 8.9 (7.4, 10.2)  | 13 (11.1, 14.9)   | 6.4 (5.6, 7.1)    |
| All                | 2039682  | 7608  | 15.3 (13, 17.6)   | 4.6 (3.8, 5.5) | 1.2 (0.9, 1.5) | 665 (548, 779)    | 934 (775, 1088)   | 465 (409, 528)    | 394 (320, 467)    | 553 (454, 650)    | 274 (239, 311)    | 8.7 (7.8, 9.6)   | 12.3 (11, 13.5)   | 6.1 (5.6, 6.6)    |
| <b>Nicaragua</b>   |          |       |                   |                |                |                   |                   |                   |                   |                   |                   |                  |                   |                   |
| Age 25-69          | 1338404  | 703   | 6.2 (5.8, 6.7)    | 5.2 (4.8, 5.6) | 1.1 (0.8, 1.3) | 12 (9, 16)        | 104 (87, 121)     | 49 (34, 68)       | 9 (6, 11)         | 75 (64, 87)       | 36 (25, 49)       | 1.7 (1.2, 2.1)   | 14.8 (12.7, 16.9) | 7 (5, 9.2)        |
| Age 70+            | 76587    | 998   | 6.2 (5.4, 7)      | 5 (4.4, 5.7)   | 1 (0.6, 1.4)   | 11 (7, 16)        | 104 (82, 129)     | 43 (24, 65)       | 159 (101, 240)    | 1527 (1167, 1920) | 628 (327, 975)    | 1.1 (0.6, 1.6)   | 10.4 (8.1, 12.8)  | 4.3 (2.4, 6.2)    |
| Female             | 723943   | 778   | 6.3 (4.9, 7.7)    | 5.2 (3.9, 6.5) | 1.1 (0.7, 1.5) | 10 (7, 14)        | 92 (72, 113)      | 42 (25, 60)       | 16 (11, 24)       | 150 (114, 189)    | 68 (37, 103)      | 1.3 (0.9, 1.8)   | 11.8 (9.6, 13.9)  | 5.4 (3.1, 7.4)    |
| Male               | 691048   | 921   | 6.2 (4.8, 7.6)    | 5.1 (3.9, 6.4) | 1 (0.7, 1.4)   | 13 (9, 17)        | 117 (96, 138)     | 51 (32, 72)       | 22 (15, 30)       | 201 (161, 242)    | 86 (52, 125)      | 1.4 (0.9, 1.9)   | 12.7 (10.4, 15.1) | 5.5 (3.2, 7.8)    |
| All                | 1414991  | 1699  | 6.3 (5.2, 7.3)    | 5.2 (4.3, 6.1) | 1.1 (0.8, 1.3) | 23 (18, 29)       | 208 (181, 239)    | 92 (66, 119)      | 19 (14, 25)       | 175 (149, 203)    | 76 (53, 101)      | 1.3 (1, 1.7)     | 12.3 (10.6, 13.8) | 5.4 (3.8, 6.9)    |
| <b>Niger</b>       |          |       |                   |                |                |                   |                   |                   |                   |                   |                   |                  |                   |                   |
| Age 25-69          | 2580698  | 954   | 9.9 (9.1, 10.7)   | 4.3 (4, 4.7)   | 0.7 (0.6, 0.8) | 15 (12, 20)       | 167 (140, 200)    | 34 (22, 46)       | 6 (5, 8)          | 69 (57, 82)       | 14 (9, 19)        | 1.6 (1.2, 2)     | 17.5 (15.3, 19.6) | 3.5 (2.4, 4.6)    |
| Age 70+            | 76356    | 418   | 9.8 (8.5, 11.3)   | 4.2 (3.6, 4.8) | 0.7 (0.4, 0.9) | 4 (3, 7)          | 51 (36, 70)       | 9 (4, 15)         | 56 (34, 89)       | 672 (475, 910)    | 120 (57, 198)     | 1 (0.5, 1.5)     | 12.2 (9.4, 15.2)  | 2.2 (0.9, 3.6)    |
| Female             | 1346151  | 779   | 10 (7.8, 12.2)    | 4.4 (3.2, 5.5) | 0.7 (0.4, 1.1) | 11 (8, 15)        | 120 (93, 149)     | 25 (15, 37)       | 9 (6, 12)         | 95 (74, 117)      | 19 (12, 29)       | 1.4 (0.9, 1.9)   | 15.5 (12.4, 18.5) | 3.2 (1.7, 4.7)    |
| Male               | 1310903  | 595   | 9.7 (7.6, 11.8)   | 4.3 (3.2, 5.4) | 0.7 (0.4, 1)   | 9 (6, 12)         | 98 (78, 120)      | 18 (11, 26)       | 7 (5, 10)         | 82 (65, 101)      | 15 (10, 22)       | 1.5 (0.9, 2)     | 16.4 (13.7, 19.2) | 3 (1.7, 4.3)      |
| All                | 2657054  | 1373  | 9.9 (8.3, 11.4)   | 4.3 (3.5, 5.1) | 0.7 (0.5, 0.9) | 20 (15, 25)       | 218 (186, 254)    | 43 (30, 56)       | 8 (6, 10)         | 89 (75, 104)      | 17 (12, 23)       | 1.4 (1.1, 1.8)   | 15.9 (14, 18)     | 3.1 (2.2, 4.1)    |
| <b>Nigeria</b>     |          |       |                   |                |                |                   |                   |                   |                   |                   |                   |                  |                   |                   |
| Age 25-69          | 33909207 | 11298 | 13.3 (12.2, 14.3) | 4.6 (4.2, 5)   | 0.9 (0.8, 0.9) | 849 (669, 1039)   | 1880 (1520, 2241) | 576 (458, 696)    | 24 (19, 30)       | 54 (43, 64)       | 16 (13, 20)       | 7.5 (6.3, 8.8)   | 16.6 (14.5, 18.9) | 5.1 (4.3, 5.9)    |
| Age 70+            | 1711779  | 8577  | 13.1 (11.4, 15)   | 4.4 (3.8, 5)   | 0.8 (0.7, 0.9) | 447 (303, 611)    | 1002 (704, 1334)  | 266 (186, 365)    | 263 (178, 357)    | 591 (417, 782)    | 156 (110, 213)    | 5.2 (3.7, 6.5)   | 11.7 (8.8, 14.4)  | 3.1 (2.3, 3.9)    |
| Female             | 18028871 | 11674 | 13.4 (10.5, 16.3) | 4.7 (3.5, 5.8) | 0.9 (0.5, 1.3) | 777 (590, 994)    | 1649 (1288, 2061) | 497 (383, 619)    | 44 (33, 56)       | 92 (72, 115)      | 28 (21, 35)       | 6.6 (5.2, 8.2)   | 14.1 (11.6, 16.6) | 4.2 (3.4, 5.1)    |
| Male               | 17592115 | 8238  | 13.1 (10.2, 15.9) | 4.5 (3.4, 5.7) | 0.9 (0.5, 1.2) | 519 (390, 661)    | 1234 (975, 1526)  | 346 (268, 432)    | 29 (22, 37)       | 70 (55, 86)       | 19 (15, 24)       | 6.3 (4.8, 7.8)   | 15 (12.2, 17.7)   | 4.2 (3.2, 5.1)    |

|                         |          |       |                   |                |                |                   |                   |                      |                 |                   |                   |                |                   |                   |
|-------------------------|----------|-------|-------------------|----------------|----------------|-------------------|-------------------|----------------------|-----------------|-------------------|-------------------|----------------|-------------------|-------------------|
| All                     | 35620986 | 19886 | 13.3 (11.2, 15.3) | 4.6 (3.7, 5.4) | 0.9 (0.6, 1.1) | 1296 (1060, 1537) | 2882 (2412, 3370) | 843 (701, 990)       | 36 (30, 43)     | 81 (68, 95)       | 24 (20, 28)       | 6.5 (5.5, 7.6) | 14.5 (12.5, 16.4) | 4.2 (3.6, 4.8)    |
| <b>North Korea</b>      |          |       |                   |                |                |                   |                   |                      |                 |                   |                   |                |                   |                   |
| Age 25-69               | 9991020  | 5515  | 7.4 (6.9, 8)      | 7.6 (7, 8.3)   | 0.8 (0.7, 1)   | 133 (90, 195)     | 557 (429, 701)    | 258 (174, 350)       | 15 (10, 23)     | 64 (48, 82)       | 29 (19, 41)       | 2.4 (1.7, 3.1) | 10.1 (8.4, 11.9)  | 4.7 (3.5, 5.8)    |
| Age 70+                 | 481632   | 4285  | 7.4 (6.4, 8.5)    | 7.4 (6.1, 8.8) | 0.8 (0.5, 1.1) | 68 (37, 108)      | 312 (213, 424)    | 126 (69, 196)        | 152 (81, 245)   | 702 (472, 973)    | 281 (153, 440)    | 1.6 (0.6, 2.5) | 7.3 (4.9, 9.6)    | 2.9 (1.5, 4.3)    |
| Female                  | 5536102  | 5536  | 7.5 (5.8, 9.2)    | 7.7 (5.9, 9.5) | 0.9 (0.5, 1.2) | 106 (67, 163)     | 461 (334, 607)    | 204 (128, 286)       | 30 (18, 48)     | 133 (90, 179)     | 57 (33, 84)       | 1.9 (1.2, 2.7) | 8.3 (6.4, 10.2)   | 3.7 (2.4, 5)      |
| Male                    | 4936550  | 4280  | 7.4 (5.7, 9)      | 7.6 (5.8, 9.4) | 0.8 (0.5, 1.2) | 95 (62, 139)      | 407 (298, 531)    | 180 (113, 256)       | 26 (16, 38)     | 112 (81, 146)     | 48 (30, 70)       | 2.2 (1.3, 3.1) | 9.5 (7.2, 11.8)   | 4.2 (2.6, 5.7)    |
| All                     | 10472652 | 9809  | 7.4 (6.3, 8.6)    | 7.6 (6.4, 8.9) | 0.8 (0.6, 1.1) | 201 (146, 274)    | 868 (699, 1064)   | 384 (278, 493)       | 28 (20, 38)     | 123 (97, 152)     | 52 (37, 70)       | 2.1 (1.5, 2.6) | 8.9 (7.4, 10.3)   | 3.9 (3, 4.9)      |
| <b>Norway</b>           |          |       |                   |                |                |                   |                   |                      |                 |                   |                   |                |                   |                   |
| Age 25-69               | 2304489  | 3075  | 12.5 (12.3, 12.7) | 3.7 (3.6, 3.8) | 1.3 (1.2, 1.4) | 155 (124, 191)    | 517 (417, 620)    | 272 (225, 318)       | 74 (60, 90)     | 247 (200, 294)    | 130 (109, 153)    | 5.1 (4.4, 5.7) | 16.8 (14.9, 18.7) | 8.9 (8, 9.7)      |
| Age 70+                 | 479296   | 9807  | 12.5 (12.1, 12.8) | 3.6 (3.4, 3.8) | 1.2 (1.1, 1.3) | 371 (285, 467)    | 1189 (930, 1459)  | 560 (460, 661)       | 869 (643, 1109) | 2769 (2089, 3445) | 1293 (1044, 1551) | 3.8 (2.9, 4.7) | 12.1 (9.7, 14.7)  | 5.7 (4.8, 6.8)    |
| Female                  | 1433211  | 5483  | 12.7 (9.9, 15.4)  | 3.7 (2.7, 4.7) | 1.3 (0.9, 1.7) | 224 (155, 303)    | 676 (482, 882)    | 332 (258, 412)       | 160 (105, 223)  | 480 (326, 645)    | 235 (178, 298)    | 4.1 (3.4, 4.8) | 12.3 (10.5, 14)   | 6.1 (5.3, 6.8)    |
| Male                    | 1350574  | 7405  | 12.4 (9.7, 15.1)  | 3.7 (2.7, 4.7) | 1.3 (0.9, 1.7) | 303 (239, 369)    | 1031 (826, 1236)  | 500 (423, 580)       | 236 (186, 288)  | 801 (636, 957)    | 388 (327, 452)    | 4.1 (3.4, 4.7) | 13.9 (11.7, 15.9) | 6.8 (5.9, 7.6)    |
| All                     | 2783785  | 12866 | 12.5 (10.6, 14.5) | 3.7 (3, 4.4)   | 1.3 (1, 1.6)   | 527 (438, 628)    | 1706 (1433, 1990) | 832 (719, 945)       | 198 (161, 238)  | 638 (526, 750)    | 310 (266, 354)    | 4.1 (3.6, 4.6) | 13.3 (11.9, 14.6) | 6.5 (5.9, 7)      |
| <b>Oman</b>             |          |       |                   |                |                |                   |                   |                      |                 |                   |                   |                |                   |                   |
| Age 25-69               | 690066   | 474   | 10.6 (9.7, 11.5)  | 5.1 (4.6, 5.5) | 1.4 (1.1, 1.6) | 12 (9, 16)        | 77 (62, 94)       | 53 (39, 68)          | 16 (11, 21)     | 102 (82, 124)     | 69 (50, 92)       | 2.5 (1.8, 3.2) | 16.3 (13.9, 18.8) | 11.1 (8.4, 13.9)  |
| Age 70+                 | 26912    | 487   | 10.6 (9.2, 12.1)  | 4.9 (4.3, 5.5) | 1.3 (1, 1.6)   | 8 (5, 12)         | 51 (38, 66)       | 31 (21, 43)          | 303 (193, 459)  | 2008 (1470, 2564) | 1211 (805, 1693)  | 1.6 (1, 2.2)   | 10.6 (8.2, 13.1)  | 6.4 (4.2, 8.6)    |
| Female                  | 274848   | 373   | 10.8 (8.5, 13.2)  | 5.1 (3.8, 6.3) | 1.4 (1, 1.9)   | 8 (5, 11)         | 46 (36, 57)       | 30 (21, 41)          | 25 (17, 35)     | 147 (112, 186)    | 96 (65, 134)      | 2.1 (1.3, 2.8) | 12.3 (9.7, 14.7)  | 8.1 (5.4, 10.7)   |
| Male                    | 442130   | 588   | 10.5 (8.2, 12.9)  | 5 (3.8, 6.3)   | 1.4 (0.9, 1.8) | 12 (8, 16)        | 83 (66, 102)      | 53 (39, 69)          | 25 (18, 35)     | 177 (141, 217)    | 114 (82, 149)     | 2 (1.2, 2.8)   | 14.1 (11, 16.9)   | 9.1 (6.1, 11.9)   |
| All                     | 716978   | 959   | 10.6 (9, 12.3)    | 5 (4.1, 5.9)   | 1.4 (1.1, 1.7) | 20 (15, 25)       | 129 (109, 151)    | 84 (66, 103)         | 25 (20, 32)     | 166 (140, 196)    | 107 (83, 133)     | 2 (1.5, 2.6)   | 13.4 (11.5, 15.6) | 8.7 (6.6, 10.8)   |
| <b>Pakistan</b>         |          |       |                   |                |                |                   |                   |                      |                 |                   |                   |                |                   |                   |
| Age 25-69               | 39664791 | 23207 | 3.6 (3.3, 3.9)    | 3.7 (3.4, 4)   | 4.2 (4, 4.4)   | 322 (238, 428)    | 4257 (3448, 5071) | 8729 (7386, 10148)   | 8 (6, 11)       | 105 (85, 124)     | 215 (182, 249)    | 1.4 (1, 1.7)   | 18.3 (15.9, 20.8) | 37.5 (34.8, 40.1) |
| Age 70+                 | 2504819  | 24045 | 3.6 (3.1, 4)      | 3.6 (3.1, 4)   | 3.9 (3.6, 4.2) | 212 (137, 316)    | 3033 (2299, 3828) | 6003 (4801, 7299)    | 87 (56, 130)    | 1245 (947, 1572)  | 2465 (1960, 3018) | 0.9 (0.5, 1.3) | 12.6 (9.8, 15.3)  | 24.9 (21.7, 28.3) |
| Female                  | 20083245 | 25885 | 3.6 (2.8, 4.5)    | 3.7 (2.7, 4.7) | 4.3 (3.4, 5.1) | 291 (195, 419)    | 3911 (3103, 4851) | 8002 (6624, 9512)    | 15 (10, 21)     | 199 (157, 248)    | 406 (336, 483)    | 1.1 (0.7, 1.5) | 15.1 (12.4, 17.8) | 31.1 (27.9, 34)   |
| Male                    | 22086365 | 21558 | 3.5 (2.7, 4.4)    | 3.6 (2.7, 4.6) | 4.1 (3.3, 5)   | 244 (173, 332)    | 3379 (2728, 4117) | 6730 (5638, 7905)    | 11 (8, 15)      | 148 (120, 180)    | 295 (248, 345)    | 1.1 (0.7, 1.5) | 15.7 (13, 18.5)   | 31.3 (28.2, 34.5) |
| All                     | 42169610 | 47259 | 3.6 (3, 4.2)      | 3.7 (3, 4.4)   | 4.2 (3.6, 4.8) | 534 (412, 682)    | 7290 (6194, 8457) | 14732 (12924, 16592) | 13 (10, 16)     | 173 (147, 201)    | 350 (307, 396)    | 1.1 (0.9, 1.4) | 15.4 (13.6, 17.4) | 31.1 (28.9, 33.2) |
| <b>Palestine</b>        |          |       |                   |                |                |                   |                   |                      |                 |                   |                   |                |                   |                   |
| Age 25-69               | 634492   | 496   | 9.3 (8.5, 10.1)   | 4.7 (4.3, 5.1) | 1.7 (1.3, 2)   | 8 (6, 11)         | 83 (66, 100)      | 68 (49, 90)          | 13 (10, 18)     | 134 (107, 162)    | 110 (79, 144)     | 1.7 (1.2, 2.1) | 16.7 (14.4, 19)   | 13.7 (10.3, 16.9) |
| Age 70+                 | 25126    | 317   | 9.3 (8.2, 10.3)   | 4.5 (4, 5.2)   | 1.5 (1, 2.1)   | 3 (2, 5)          | 36 (27, 45)       | 27 (16, 39)          | 128 (79, 190)   | 1401 (1068, 1779) | 1042 (637, 1519)  | 1 (0.6, 1.5)   | 11.3 (8.9, 13.8)  | 8.4 (5.2, 11.9)   |
| Female                  | 329198   | 232   | 9.5 (7.4, 11.6)   | 4.8 (3.6, 6)   | 1.7 (1.2, 2.2) | 3 (2, 4)          | 31 (25, 39)       | 26 (18, 35)          | 10 (7, 14)      | 100 (78, 124)     | 82 (56, 111)      | 1.3 (0.8, 1.8) | 13.5 (11, 16.1)   | 11.2 (7.4, 14.9)  |
| Male                    | 330420   | 581   | 9.1 (7.1, 11.2)   | 4.7 (3.5, 5.8) | 1.6 (1.2, 2.1) | 8 (6, 11)         | 88 (70, 105)      | 69 (50, 92)          | 27 (19, 36)     | 278 (224, 336)    | 218 (158, 289)    | 1.4 (0.9, 2)   | 15.1 (12.3, 18)   | 11.8 (7.7, 15.8)  |
| All                     | 659618   | 814   | 9.3 (7.9, 10.8)   | 4.7 (3.9, 5.5) | 1.6 (1.3, 2)   | 12 (9, 15)        | 119 (101, 138)    | 95 (73, 118)         | 18 (14, 23)     | 189 (160, 219)    | 151 (117, 187)    | 1.4 (1, 1.8)   | 14.6 (12.7, 16.5) | 11.7 (8.7, 14.4)  |
| <b>Panama</b>           |          |       |                   |                |                |                   |                   |                      |                 |                   |                   |                |                   |                   |
| Age 25-69               | 983342   | 516   | 6.6 (6.1, 7.1)    | 6.4 (5.8, 6.9) | 1.2 (1, 1.4)   | 10 (7, 14)        | 64 (52, 77)       | 40 (30, 52)          | 12 (8, 16)      | 73 (59, 88)       | 46 (34, 60)       | 2 (1.5, 2.5)   | 12.4 (10.6, 14.2) | 7.8 (6.3, 9.5)    |
| Age 70+                 | 76126    | 1119  | 6.5 (5.8, 7.4)    | 6.1 (5.4, 6.9) | 1.1 (0.8, 1.4) | 14 (9, 22)        | 98 (75, 126)      | 55 (36, 76)          | 193 (118, 309)  | 1334 (999, 1724)  | 748 (479, 1052)   | 1.3 (0.7, 1.8) | 8.8 (6.7, 10.8)   | 4.9 (3.2, 6.7)    |
| Female                  | 527267   | 671   | 6.7 (5.2, 8.2)    | 6.5 (4.9, 8.1) | 1.2 (0.8, 1.6) | 10 (6, 15)        | 63 (46, 81)       | 37 (24, 53)          | 21 (13, 35)     | 140 (101, 181)    | 82 (50, 122)      | 1.5 (0.9, 2)   | 9.4 (7.5, 11.4)   | 5.6 (3.9, 7.2)    |
| Male                    | 532201   | 965   | 6.5 (5, 8)        | 6.3 (4.8, 7.8) | 1.2 (0.8, 1.6) | 15 (10, 21)       | 99 (77, 120)      | 58 (41, 77)          | 30 (20, 43)     | 202 (158, 247)    | 119 (84, 159)     | 1.5 (1, 2.1)   | 10.2 (8.3, 11.9)  | 6 (4.2, 7.8)      |
| All                     | 1059468  | 1636  | 6.6 (5.5, 7.6)    | 6.4 (5.3, 7.5) | 1.2 (0.9, 1.5) | 24 (17, 33)       | 162 (135, 191)    | 95 (73, 120)         | 26 (18, 35)     | 171 (142, 202)    | 101 (76, 128)     | 1.5 (1.1, 1.9) | 9.9 (8.6, 11.3)   | 5.8 (4.6, 7)      |
| <b>Papua New Guinea</b> |          |       |                   |                |                |                   |                   |                      |                 |                   |                   |                |                   |                   |

|                    |          |       |                   |                |                |                   |                      |                   |                   |                   |                  |                   |                   |                   |
|--------------------|----------|-------|-------------------|----------------|----------------|-------------------|----------------------|-------------------|-------------------|-------------------|------------------|-------------------|-------------------|-------------------|
| Age 25-69          | 1472986  | 740   | 23.1 (21.4, 24.9) | 3 (2.7, 3.2)   | 0.9 (0.8, 1.1) | 149 (112, 189)    | 149 (112, 189)       | 41 (27, 59)       | 102 (76, 130)     | 102 (76, 130)     | 28 (19, 40)      | 20.1 (17.7, 22.4) | 20.2 (17.7, 22.7) | 5.6 (4.1, 7)      |
| Age 70+            | 50906    | 329   | 22.9 (19.7, 26)   | 2.9 (2.5, 3.2) | 0.8 (0.6, 1.1) | 46 (27, 68)       | 46 (27, 68)          | 11 (6, 19)        | 919 (559, 1334)   | 919 (559, 1334)   | 220 (112, 366)   | 14 (11, 17)       | 14 (11.1, 17.1)   | 3.4 (1.8, 5)      |
| Female             | 753709   | 543   | 23.4 (18.5, 28.4) | 3 (2.2, 3.8)   | 0.9 (0.5, 1.3) | 93 (63, 127)      | 93 (63, 127)         | 25 (15, 37)       | 128 (87, 174)     | 128 (87, 174)     | 34 (21, 50)      | 17.1 (14.2, 19.9) | 17.1 (14.1, 20)   | 4.5 (3, 6.1)      |
| Male               | 770183   | 528   | 22.7 (17.9, 27.5) | 2.9 (2.1, 3.7) | 0.9 (0.5, 1.3) | 103 (74, 138)     | 103 (74, 138)        | 28 (17, 42)       | 135 (97, 181)     | 135 (97, 181)     | 36 (22, 54)      | 19.6 (16.1, 23.1) | 19.5 (16.2, 22.7) | 5.3 (3.3, 7.1)    |
| All                | 1523892  | 1065  | 23 (19.6, 26.5)   | 3 (2.4, 3.6)   | 0.9 (0.6, 1.2) | 196 (153, 241)    | 196 (153, 241)       | 52 (37, 71)       | 131 (103, 161)    | 131 (103, 161)    | 35 (25, 47)      | 18.4 (16, 20.7)   | 18.4 (16, 20.7)   | 4.9 (3.6, 6.2)    |
| <b>Paraguay</b>    |          |       |                   |                |                |                   |                      |                   |                   |                   |                  |                   |                   |                   |
| Age 25-69          | 1574605  | 903   | 8.5 (7.8, 9.2)    | 5 (4.6, 5.4)   | 1.8 (1.5, 2.1) | 15 (11, 20)       | 138 (117, 162)       | 127 (97, 157)     | 10 (8, 14)        | 95 (80, 111)      | 87 (66, 108)     | 1.6 (1.2, 2.1)    | 15.3 (13.3, 17.2) | 14.1 (11.4, 16.7) |
| Age 70+            | 102909   | 1370  | 8.5 (7.5, 9.6)    | 4.8 (4.1, 5.4) | 1.7 (1.2, 2.1) | 15 (9, 22)        | 147 (114, 182)       | 124 (84, 163)     | 153 (96, 231)     | 1535 (1171, 1912) | 1287 (866, 1729) | 1.1 (0.6, 1.5)    | 10.7 (8.4, 12.9)  | 9 (6.1, 11.8)     |
| Female             | 835503   | 1129  | 8.6 (6.7, 10.5)   | 5 (3.8, 6.3)   | 1.8 (1.3, 2.3) | 14 (9, 21)        | 135 (106, 168)       | 121 (88, 160)     | 19 (12, 29)       | 183 (140, 232)    | 163 (116, 221)   | 1.3 (0.8, 1.7)    | 12 (9.9, 14.1)    | 10.8 (8.1, 13.4)  |
| Male               | 842011   | 1144  | 8.4 (6.5, 10.3)   | 4.9 (3.7, 6.2) | 1.7 (1.3, 2.2) | 15 (11, 22)       | 150 (122, 179)       | 129 (95, 167)     | 21 (15, 30)       | 208 (167, 248)    | 179 (129, 233)   | 1.3 (0.9, 1.8)    | 13.1 (10.8, 15.4) | 11.3 (8, 14.3)    |
| All                | 1677514  | 2273  | 8.5 (7.2, 9.9)    | 5 (4.1, 5.9)   | 1.8 (1.4, 2.1) | 30 (23, 39)       | 285 (243, 327)       | 251 (202, 305)    | 20 (15, 27)       | 195 (166, 225)    | 171 (135, 209)   | 1.3 (1, 1.6)      | 12.5 (10.8, 14.2) | 11 (9, 13.1)      |
| <b>Peru</b>        |          |       |                   |                |                |                   |                      |                   |                   |                   |                  |                   |                   |                   |
| Age 25-69          | 8477415  | 3152  | 6.6 (6.1, 7.1)    | 4.5 (4.1, 4.9) | 2.3 (2.2, 2.4) | 49 (37, 64)       | 521 (443, 601)       | 625 (554, 702)    | 6 (5, 8)          | 65 (55, 76)       | 78 (69, 88)      | 1.6 (1.2, 2)      | 16.5 (14.4, 18.6) | 19.9 (18.1, 21.6) |
| Age 70+            | 531248   | 4793  | 6.6 (5.7, 7.5)    | 4.4 (3.8, 4.9) | 2.1 (2, 2.3)   | 48 (31, 71)       | 545 (428, 671)       | 599 (499, 699)    | 96 (61, 148)      | 1094 (850, 1360)  | 1198 (991, 1417) | 1 (0.6, 1.4)      | 11.4 (8.9, 13.8)  | 12.5 (10.6, 14.4) |
| Female             | 4555588  | 3781  | 6.8 (5.2, 8.3)    | 4.6 (3.4, 5.7) | 2.3 (1.8, 2.9) | 45 (31, 67)       | 484 (376, 595)       | 562 (474, 660)    | 12 (8, 19)        | 133 (99, 165)     | 153 (127, 183)   | 1.2 (0.8, 1.6)    | 12.8 (10.6, 15)   | 14.9 (13.2, 16.5) |
| Male               | 4453075  | 4164  | 6.5 (5, 8)        | 4.5 (3.3, 5.6) | 2.3 (1.7, 2.8) | 52 (39, 71)       | 583 (484, 682)       | 662 (580, 745)    | 14 (10, 19)       | 156 (127, 185)    | 176 (154, 199)   | 1.3 (0.8, 1.7)    | 14 (11.7, 16.1)   | 15.9 (13.9, 17.8) |
| All                | 9008663  | 7953  | 6.6 (5.6, 7.7)    | 4.5 (3.7, 5.3) | 2.3 (1.9, 2.7) | 97 (75, 123)      | 1066 (926, 1212)     | 1224 (1107, 1364) | 13 (10, 17)       | 145 (124, 167)    | 165 (147, 183)   | 1.2 (0.9, 1.5)    | 13.4 (11.7, 15)   | 15.4 (14.1, 16.7) |
| <b>Philippines</b> |          |       |                   |                |                |                   |                      |                   |                   |                   |                  |                   |                   |                   |
| Age 25-69          | 22707080 | 16487 | 17.9 (17.5, 18.3) | 2.5 (2.3, 2.7) | 0.9 (0.9, 1)   | 3007 (2618, 3409) | 3624 (3166, 4100)    | 990 (876, 1109)   | 144 (126, 164)    | 174 (152, 197)    | 47 (42, 53)      | 18.2 (16, 20.6)   | 22 (19.3, 24.4)   | 6 (5.3, 6.8)      |
| Age 70+            | 1142457  | 15037 | 17.8 (17.2, 18.4) | 2.4 (2.1, 2.7) | 0.9 (0.8, 0.9) | 1739 (1371, 2132) | 2099 (1665, 2561)    | 481 (393, 578)    | 1490 (1170, 1819) | 1796 (1424, 2187) | 413 (337, 497)   | 11.6 (9.1, 14.2)  | 14 (11, 17)       | 3.2 (2.6, 3.8)    |
| Female             | 12012996 | 12643 | 18.1 (14.2, 22)   | 2.5 (1.8, 3.3) | 0.9 (0.6, 1.3) | 1826 (1511, 2133) | 2128 (1768, 2484)    | 558 (471, 651)    | 160 (133, 186)    | 186 (155, 216)    | 49 (41, 57)      | 14.4 (11.9, 16.8) | 16.8 (14.1, 19.6) | 4.4 (3.7, 5.2)    |
| Male               | 11836541 | 18899 | 17.7 (13.9, 21.4) | 2.4 (1.7, 3.1) | 0.9 (0.5, 1.3) | 2921 (2529, 3344) | 3595 (3125, 4107)    | 913 (797, 1040)   | 258 (223, 296)    | 318 (276, 364)    | 81 (71, 92)      | 15.5 (12.8, 18.1) | 19 (15.8, 22)     | 4.8 (4, 5.7)      |
| All                | 23849537 | 31516 | 17.9 (15.2, 20.6) | 2.5 (2, 3)     | 0.9 (0.7, 1.2) | 4746 (4200, 5290) | 5723 (5071, 6370)    | 1470 (1321, 1637) | 208 (184, 231)    | 251 (223, 278)    | 65 (58, 72)      | 15 (13.2, 16.9)   | 18.2 (16.2, 20.3) | 4.7 (4.1, 5.2)    |
| <b>Poland</b>      |          |       |                   |                |                |                   |                      |                   |                   |                   |                  |                   |                   |                   |
| Age 25-69          | 20860096 | 37569 | 11.6 (11.3, 12)   | 4.6 (4.4, 4.7) | 1 (1, 1.1)     | 1410 (1145, 1690) | 6116 (5105, 7125)    | 2431 (2090, 2814) | 73 (59, 88)       | 316 (264, 370)    | 125 (108, 145)   | 3.7 (3.2, 4.3)    | 16.3 (14.4, 18.2) | 6.5 (5.8, 7.1)    |
| Age 70+            | 2376823  | 58191 | 11.6 (11.1, 12.2) | 4.4 (4.1, 4.7) | 1 (0.9, 1)     | 1543 (1116, 1978) | 6391 (4839, 7808)    | 2253 (1850, 2746) | 660 (475, 846)    | 2732 (2048, 3347) | 963 (787, 1182)  | 2.6 (1.9, 3.3)    | 11 (8.7, 13.3)    | 3.9 (3.2, 4.6)    |
| Female             | 12273267 | 43068 | 11.8 (9.2, 14.3)  | 4.6 (3.4, 5.8) | 1 (0.6, 1.4)   | 1295 (905, 1700)  | 5090 (3760, 6397)    | 1903 (1546, 2346) | 135 (90, 181)     | 527 (377, 672)    | 195 (155, 245)   | 3 (2.5, 3.6)      | 11.8 (10.1, 13.6) | 4.4 (3.9, 5)      |
| Male               | 10963652 | 52693 | 11.5 (9, 14)      | 4.5 (3.4, 5.7) | 1 (0.6, 1.4)   | 1657 (1340, 1984) | 7417 (6242, 8614)    | 2780 (2406, 3202) | 179 (143, 218)    | 802 (666, 941)    | 297 (257, 344)   | 3.1 (2.5, 3.8)    | 14.1 (12.1, 16.2) | 5.3 (4.6, 6)      |
| All                | 23236919 | 95781 | 11.6 (9.9, 13.4)  | 4.6 (3.7, 5.4) | 1 (0.7, 1.3)   | 2952 (2443, 3476) | 12507 (10712, 14251) | 4683 (4165, 5286) | 156 (127, 185)    | 656 (553, 754)    | 243 (216, 277)   | 3.1 (2.7, 3.5)    | 13.1 (11.7, 14.4) | 4.9 (4.5, 5.3)    |
| <b>Portugal</b>    |          |       |                   |                |                |                   |                      |                   |                   |                   |                  |                   |                   |                   |
| Age 25-69          | 5394021  | 4566  | 9.6 (9.4, 9.8)    | 5.8 (5.4, 6.3) | 1.2 (1.1, 1.3) | 81 (57, 113)      | 611 (494, 735)       | 361 (307, 417)    | 15 (11, 21)       | 113 (92, 135)     | 67 (57, 77)      | 1.8 (1.3, 2.2)    | 13.4 (11.5, 15.2) | 7.9 (7.1, 8.7)    |
| Age 70+            | 886681   | 11493 | 9.5 (9.2, 9.9)    | 5.6 (4.8, 6.3) | 1.1 (1, 1.2)   | 134 (82, 211)     | 1083 (825, 1360)     | 558 (451, 676)    | 157 (96, 251)     | 1277 (958, 1612)  | 655 (525, 798)   | 1.2 (0.6, 1.6)    | 9.4 (7.3, 11.6)   | 4.9 (4, 5.7)      |
| Female             | 3354433  | 7611  | 9.7 (7.5, 11.8)   | 5.9 (4.4, 7.3) | 1.2 (0.8, 1.6) | 97 (57, 167)      | 748 (535, 985)       | 410 (320, 508)    | 35 (20, 63)       | 273 (188, 367)    | 149 (113, 188)   | 1.3 (0.9, 1.7)    | 9.8 (8.3, 11.4)   | 5.4 (4.7, 6.1)    |
| Male               | 2926269  | 8430  | 9.5 (7.4, 11.5)   | 5.7 (4.3, 7.1) | 1.2 (0.8, 1.6) | 118 (79, 167)     | 947 (757, 1143)      | 508 (428, 601)    | 46 (30, 67)       | 371 (291, 453)    | 196 (165, 235)   | 1.4 (0.9, 1.8)    | 11.2 (9.3, 13.1)  | 6 (5.2, 6.9)      |
| All                | 6280702  | 16027 | 9.6 (8.1, 11.1)   | 5.8 (4.8, 6.8) | 1.2 (0.9, 1.5) | 215 (155, 291)    | 1694 (1403, 1989)    | 919 (791, 1051)   | 40 (28, 57)       | 320 (259, 380)    | 171 (146, 199)   | 1.3 (1.1, 1.7)    | 10.6 (9.4, 11.8)  | 5.7 (5.2, 6.3)    |
| <b>Qatar</b>       |          |       |                   |                |                |                   |                      |                   |                   |                   |                  |                   |                   |                   |
| Age 25-69          | 271345   | 126   | 10.6 (9.6, 11.5)  | 5.7 (5.1, 6.2) | 1.3 (1.1, 1.6) | 4 (3, 5)          | 20 (16, 24)          | 14 (10, 18)       | 12 (9, 17)        | 67 (53, 81)       | 48 (34, 64)      | 2.8 (1.8, 3.8)    | 15.6 (12.5, 18.3) | 11.1 (7.9, 14.5)  |
| Age 70+            | 3135     | 64    | 10.6 (9.2, 11.9)  | 5.5 (4.8, 6.2) | 1.2 (0.9, 1.5) | 1 (1, 2)          | 6 (5, 8)             | 4 (2, 5)          | 285 (175, 436)    | 1677 (1221, 2195) | 1031 (626, 1481) | 1.7 (0.8, 2.6)    | 9.7 (6.9, 12.7)   | 5.9 (3, 8.7)      |

|                                         |          |        |                   |                 |                |                      |                      |                      |                   |                   |                  |                   |                   |                  |
|-----------------------------------------|----------|--------|-------------------|-----------------|----------------|----------------------|----------------------|----------------------|-------------------|-------------------|------------------|-------------------|-------------------|------------------|
| Female                                  | 65410    | 40     | 10.9 (8.5, 13.2)  | 5.8 (4.4, 7.2)  | 1.4 (0.9, 1.8) | 1 (1, 1)             | 5 (4, 6)             | 3 (2, 4)             | 12 (8, 16)        | 57 (46, 69)       | 40 (29, 51)      | 2.3 (1.5, 3.2)    | 11.6 (9.2, 14.2)  | 7.9 (5.3, 10.6)  |
| Male                                    | 209070   | 149    | 10.5 (8.2, 12.9)  | 5.7 (4.3, 7.1)  | 1.3 (0.9, 1.8) | 4 (3, 5)             | 21 (17, 25)          | 15 (11, 19)          | 15 (11, 21)       | 87 (70, 106)      | 61 (44, 81)      | 2.5 (1.4, 3.5)    | 14.1 (10.9, 17.4) | 9.8 (6.3, 13.1)  |
| All                                     | 274480   | 189    | 10.6 (9, 12.3)    | 5.7 (4.7, 6.7)  | 1.3 (1, 1.6)   | 5 (4, 6)             | 26 (21, 30)          | 18 (14, 22)          | 15 (11, 19)       | 82 (67, 97)       | 57 (43, 74)      | 2.4 (1.7, 3.2)    | 13.6 (11.1, 15.9) | 9.4 (6.7, 12)    |
| <b>Romania</b>                          |          |        |                   |                 |                |                      |                      |                      |                   |                   |                  |                   |                   |                  |
| Age 25-69                               | 12452385 | 19837  | 21.6 (20.9, 22.2) | 9.1 (8.4, 9.7)  | 0.9 (0.9, 1)   | 1439 (1104, 1861)    | 1439 (1104, 1861)    | 1014 (864, 1165)     | 109 (84, 139)     | 109 (84, 139)     | 77 (66, 88)      | 7.3 (5.8, 8.7)    | 7.3 (5.9, 8.7)    | 5.1 (4.6, 5.7)   |
| Age 70+                                 | 1432179  | 39515  | 21.5 (20.4, 22.6) | 8.8 (7.6, 9.8)  | 0.8 (0.8, 0.9) | 2035 (1393, 2765)    | 2035 (1393, 2765)    | 1215 (999, 1473)     | 1397 (945, 1911)  | 1397 (945, 1911)  | 836 (678, 1021)  | 5.2 (3.5, 6.7)    | 5.2 (3.5, 6.6)    | 3.1 (2.5, 3.6)   |
| Female                                  | 7195774  | 28940  | 21.8 (17.2, 26.4) | 9.2 (7, 11.3)   | 0.9 (0.5, 1.3) | 1568 (1052, 2155)    | 1568 (1052, 2155)    | 1027 (828, 1258)     | 288 (186, 412)    | 288 (186, 412)    | 185 (145, 233)   | 5.4 (4, 6.8)      | 5.4 (4, 6.8)      | 3.5 (3, 4.1)     |
| Male                                    | 6688790  | 30337  | 21.3 (16.8, 25.9) | 9 (6.9, 11)     | 0.9 (0.5, 1.3) | 1906 (1380, 2478)    | 1906 (1380, 2478)    | 1202 (1023, 1397)    | 321 (229, 424)    | 321 (229, 424)    | 199 (168, 233)   | 6.3 (4.8, 7.9)    | 6.3 (4.8, 7.8)    | 4 (3.4, 4.6)     |
| All                                     | 13884564 | 59309  | 21.6 (18.3, 24.8) | 9.1 (7.6, 10.5) | 0.9 (0.6, 1.2) | 3474 (2727, 4235)    | 3474 (2727, 4235)    | 2229 (1964, 2508)    | 304 (232, 387)    | 304 (232, 387)    | 192 (168, 221)   | 5.9 (4.8, 6.8)    | 5.9 (4.9, 6.8)    | 3.8 (3.4, 4.1)   |
| <b>Russia</b>                           |          |        |                   |                 |                |                      |                      |                      |                   |                   |                  |                   |                   |                  |
| Age 25-69                               | 84716405 | 172613 | 15.2 (14.1, 16.2) | 6.3 (5.9, 6.8)  | 0.9 (0.9, 1)   | 19208 (15559, 23212) | 21879 (17730, 26219) | 9108 (7726, 10493)   | 223 (180, 267)    | 253 (205, 300)    | 106 (91, 121)    | 11.1 (9.6, 12.6)  | 12.7 (11, 14.4)   | 5.3 (4.8, 5.9)   |
| Age 70+                                 | 9512344  | 326587 | 15.3 (13.1, 17.6) | 6.1 (5.3, 6.9)  | 0.9 (0.8, 0.9) | 25526 (19139, 33495) | 28512 (21570, 36954) | 10281 (8218, 12555)  | 2677 (1992, 3507) | 3004 (2261, 3893) | 1084 (874, 1319) | 7.8 (5.8, 9.8)    | 8.7 (6.6, 10.9)   | 3.2 (2.5, 3.8)   |
| Female                                  | 52301333 | 287537 | 15.4 (12.1, 18.7) | 6.4 (4.8, 7.9)  | 0.9 (0.5, 1.3) | 24346 (17842, 32093) | 26671 (19557, 34864) | 10119 (7995, 12337)  | 543 (380, 738)    | 594 (418, 800)    | 224 (174, 279)   | 8.5 (6.9, 9.9)    | 9.3 (7.9, 10.7)   | 3.5 (3.1, 3.9)   |
| Male                                    | 41927416 | 210914 | 15 (11.8, 18.3)   | 6.3 (4.7, 7.8)  | 0.9 (0.5, 1.3) | 20388 (16309, 24542) | 23719 (19172, 28180) | 9270 (7856, 10854)   | 596 (473, 719)    | 694 (560, 832)    | 266 (225, 312)   | 9.7 (7.9, 11.5)   | 11.2 (8.8, 13.4)  | 4.4 (3.8, 5.1)   |
| All                                     | 94228749 | 498480 | 15.2 (12.9, 17.5) | 6.3 (5.2, 7.4)  | 0.9 (0.6, 1.2) | 44734 (36767, 53361) | 50391 (41636, 59832) | 19389 (16833, 22171) | 566 (465, 685)    | 638 (530, 765)    | 243 (209, 281)   | 9 (7.8, 10.1)     | 10.1 (8.9, 11.3)  | 3.9 (3.5, 4.3)   |
| <b>Rwanda</b>                           |          |        |                   |                 |                |                      |                      |                      |                   |                   |                  |                   |                   |                  |
| Age 25-69                               | 2215611  | 1628   | 10.1 (9.4, 10.9)  | 3.4 (2.9, 3.9)  | 1.4 (1, 1.8)   | 25 (17, 35)          | 312 (254, 370)       | 177 (119, 243)       | 11 (7, 15)        | 132 (107, 156)    | 75 (50, 103)     | 1.5 (1, 2.1)      | 19.2 (16.5, 21.7) | 10.9 (7.4, 14.4) |
| Age 70+                                 | 78843    | 753    | 10 (8.8, 11.3)    | 3.3 (2.6, 4)    | 1.3 (0.7, 1.9) | 7 (4, 13)            | 98 (74, 125)         | 50 (25, 79)          | 95 (55, 161)      | 1252 (933, 1593)  | 644 (332, 999)   | 1 (0.5, 1.5)      | 13 (10.2, 15.8)   | 6.7 (3.3, 10)    |
| Female                                  | 1177649  | 1086   | 10.2 (8, 12.4)    | 3.5 (2.5, 4.4)  | 1.4 (1, 1.8)   | 14 (9, 22)           | 176 (140, 217)       | 100 (61, 143)        | 12 (8, 18)        | 152 (120, 186)    | 86 (53, 120)     | 1.3 (0.7, 2)      | 16.2 (13.3, 19.1) | 9.2 (5.3, 13.4)  |
| Male                                    | 1116805  | 1290   | 10 (7.8, 12.2)    | 3.4 (2.5, 4.3)  | 1.4 (0.9, 1.8) | 18 (12, 27)          | 233 (186, 284)       | 127 (79, 181)        | 16 (11, 24)       | 211 (170, 255)    | 115 (72, 162)    | 1.4 (0.6, 2.1)    | 18.1 (14.6, 21.7) | 9.9 (5.2, 14.5)  |
| All                                     | 2294454  | 2377   | 10.1 (8.5, 11.7)  | 3.4 (2.8, 4.1)  | 1.4 (1.1, 1.7) | 32 (23, 43)          | 410 (350, 477)       | 227 (163, 301)       | 14 (10, 19)       | 180 (154, 209)    | 100 (72, 132)    | 1.4 (0.9, 1.9)    | 17.2 (14.9, 19.4) | 9.6 (6.3, 12.5)  |
| <b>Saint Lucia</b>                      |          |        |                   |                 |                |                      |                      |                      |                   |                   |                  |                   |                   |                  |
| Age 25-69                               | 52438    | 37     | 8.5 (7.9, 9.1)    | 3.9 (3.6, 4.2)  | 0.5 (0.4, 0.6) | 0 (0, 1)             | 6 (5, 7)             | 0 (0, 1)             | 8 (6, 11)         | 104 (87, 120)     | 8 (5, 11)        | 1.3 (1, 1.7)      | 17.1 (14.9, 19.1) | 1.3 (0.8, 1.7)   |
| Age 70+                                 | 6793     | 92     | 8.5 (7.4, 9.5)    | 3.8 (3.3, 4.3)  | 0.4 (0.3, 0.6) | 1 (1, 1)             | 11 (9, 14)           | 1 (0, 1)             | 140 (92, 208)     | 1915 (1467, 2395) | 117 (54, 203)    | 0.9 (0.6, 1.2)    | 12.3 (9.7, 14.6)  | 0.8 (0.3, 1.2)   |
| Female                                  | 30924    | 61     | 8.6 (6.7, 10.5)   | 3.9 (2.9, 5)    | 0.5 (0.2, 0.8) | 1 (0, 1)             | 8 (6, 10)            | 1 (0, 1)             | 18 (12, 29)       | 242 (180, 308)    | 16 (8, 29)       | 1 (0.7, 1.4)      | 13.2 (11.1, 15.5) | 0.9 (0.5, 1.3)   |
| Male                                    | 28307    | 68     | 8.4 (6.6, 10.3)   | 3.8 (2.8, 4.8)  | 0.5 (0.2, 0.8) | 1 (0, 1)             | 9 (8, 11)            | 1 (0, 1)             | 21 (15, 29)       | 282 (221, 341)    | 18 (10, 29)      | 1.1 (0.7, 1.4)    | 14 (11.8, 16.2)   | 0.9 (0.5, 1.3)   |
| All                                     | 59231    | 129    | 8.5 (7.2, 9.8)    | 3.9 (3.2, 4.6)  | 0.5 (0.3, 0.7) | 1 (1, 2)             | 18 (15, 20)          | 1 (1, 2)             | 20 (15, 26)       | 261 (218, 305)    | 17 (11, 25)      | 1 (0.8, 1.3)      | 13.6 (11.9, 15.2) | 0.9 (0.6, 1.2)   |
| <b>Saint Vincent and the Grenadines</b> |          |        |                   |                 |                |                      |                      |                      |                   |                   |                  |                   |                   |                  |
| Age 25-69                               | 39697    | 27     | 9.4 (8.6, 10.1)   | 3.1 (2.8, 3.4)  | 0.5 (0.4, 0.5) | 0 (0, 0)             | 5 (4, 6)             | 0 (0, 0)             | 8 (6, 11)         | 126 (106, 146)    | 8 (5, 11)        | 1.2 (0.9, 1.4)    | 18.3 (16.2, 20.7) | 1.1 (0.7, 1.5)   |
| Age 70+                                 | 4388     | 72     | 9.3 (8.2, 10.6)   | 3 (2.6, 3.4)    | 0.4 (0.3, 0.5) | 1 (0, 1)             | 9 (7, 11)            | 0 (0, 1)             | 129 (83, 185)     | 2184 (1713, 2635) | 105 (51, 177)    | 0.8 (0.5, 1.1)    | 13.1 (10.4, 15.8) | 0.6 (0.3, 1)     |
| Female                                  | 22726    | 52     | 9.5 (7.4, 11.6)   | 3.1 (2.2, 4)    | 0.5 (0.2, 0.8) | 0 (0, 1)             | 7 (6, 9)             | 0 (0, 1)             | 18 (12, 28)       | 292 (223, 366)    | 15 (7, 26)       | 0.8 (0.6, 1.1)    | 14 (11.8, 16.2)   | 0.7 (0.4, 1.1)   |
| Male                                    | 21359    | 48     | 9.3 (7.2, 11.3)   | 3.1 (2.2, 3.9)  | 0.5 (0.1, 0.8) | 0 (0, 1)             | 7 (6, 9)             | 0 (0, 1)             | 19 (13, 27)       | 318 (260, 379)    | 17 (10, 26)      | 0.9 (0.6, 1.2)    | 15.1 (12.5, 17.5) | 0.8 (0.4, 1.2)   |
| All                                     | 44085    | 100    | 9.4 (7.9, 10.9)   | 3.1 (2.5, 3.7)  | 0.5 (0.2, 0.7) | 1 (1, 1)             | 14 (12, 17)          | 1 (0, 1)             | 19 (14, 24)       | 305 (259, 350)    | 16 (11, 23)      | 0.9 (0.7, 1.1)    | 14.5 (12.9, 16.2) | 0.8 (0.5, 1)     |
| <b>Samoa</b>                            |          |        |                   |                 |                |                      |                      |                      |                   |                   |                  |                   |                   |                  |
| Age 25-69                               | 55672    | 49     | 26.6 (26.1, 27.1) | 2 (1.8, 2.2)    | 0.8 (0.6, 0.9) | 11 (8, 13)           | 11 (8, 13)           | 2 (1, 3)             | 198 (153, 245)    | 198 (153, 245)    | 38 (25, 55)      | 21.9 (19.3, 24.5) | 21.8 (19.4, 24.2) | 4.2 (3, 5.4)     |
| Age 70+                                 | 3315     | 21     | 26.5 (25.8, 27.1) | 1.9 (1.6, 2.2)  | 0.7 (0.5, 0.9) | 3 (2, 5)             | 3 (2, 5)             | 1 (0, 1)             | 996 (587, 1475)   | 996 (587, 1475)   | 165 (70, 293)    | 15 (11.9, 18.3)   | 15.1 (12, 18.1)   | 2.5 (1.3, 3.7)   |
| Female                                  | 28926    | 20     | 26.9 (21.3, 32.6) | 2 (1.4, 2.7)    | 0.8 (0.4, 1.1) | 4 (2, 5)             | 4 (2, 5)             | 1 (0, 1)             | 150 (96, 213)     | 150 (96, 213)     | 28 (15, 45)      | 18.1 (15.2, 21)   | 18 (15.1, 20.8)   | 3.4 (2, 4.6)     |
| Male                                    | 30061    | 50     | 26.2 (20.7, 31.8) | 2 (1.4, 2.6)    | 0.8 (0.4, 1.1) | 10 (8, 13)           | 10 (8, 13)           | 2 (1, 3)             | 365 (282, 463)    | 365 (282, 463)    | 67 (41, 98)      | 20.5 (17.1, 23.8) | 20.5 (17.2, 23.8) | 3.8 (2.3, 5.2)   |

|                     |         |       |                   |                  |                |                |                   |                |                   |                   |                |                   |                   |                  |
|---------------------|---------|-------|-------------------|------------------|----------------|----------------|-------------------|----------------|-------------------|-------------------|----------------|-------------------|-------------------|------------------|
| All                 | 58987   | 70    | 26.6 (22.6, 30.5) | 2 (1.6, 2.5)     | 0.8 (0.5, 1)   | 14 (11, 17)    | 14 (11, 17)       | 3 (2, 4)       | 259 (205, 314)    | 259 (205, 314)    | 48 (32, 65)    | 19.8 (17.7, 22.1) | 19.9 (17.6, 22)   | 3.7 (2.6, 4.6)   |
| <b>Saudi Arabia</b> |         |       |                   |                  |                |                |                   |                |                   |                   |                |                   |                   |                  |
| Age 25-69           | 37456   | 15    | 14.4 (13, 15.7)   | 3.5 (3.2, 3.8)   | 1 (0.9, 1)     | 2 (2, 2)       | 3 (2, 4)          | 2 (1, 2)       | 43 (35, 51)       | 62 (52, 75)       | 37 (26, 47)    | 13.4 (11.5, 15.3) | 19.8 (17.3, 22.4) | 11.4 (8.3, 14.6) |
| Age 70+             | 2988    | 17    | 14.4 (12.4, 16.2) | 3.4 (2.9, 3.8)   | 0.9 (0.8, 1)   | 2 (1, 2)       | 2 (2, 3)          | 1 (1, 2)       | 506 (372, 647)    | 747 (558, 942)    | 393 (224, 594) | 9.2 (7.1, 11.3)   | 13.5 (10.8, 16.4) | 7.1 (4, 10.2)    |
| Female              | 21087   | 20    | 14.8 (11.6, 18)   | 3.6 (2.6, 4.5)   | 1 (0.6, 1.4)   | 2 (2, 3)       | 3 (2, 4)          | 2 (1, 3)       | 91 (71, 113)      | 130 (102, 160)    | 73 (47, 103)   | 11.1 (9, 13.2)    | 15.9 (13.3, 18.7) | 8.9 (5.4, 12.3)  |
| Male                | 19357   | 12    | 14.2 (11.1, 17.3) | 3.5 (2.6, 4.4)   | 1 (0.6, 1.3)   | 1 (1, 2)       | 2 (2, 3)          | 1 (1, 2)       | 59 (47, 72)       | 90 (73, 111)      | 49 (35, 69)    | 11.3 (9, 13.5)    | 17.5 (14.3, 20.8) | 9.6 (6.1, 13.1)  |
| All                 | 40444   | 33    | 14.4 (12.2, 16.6) | 3.5 (2.8, 4.2)   | 1 (0.7, 1.2)   | 4 (3, 4)       | 5 (4, 6)          | 3 (2, 4)       | 75 (63, 88)       | 111 (94, 129)     | 62 (46, 79)    | 11.1 (9.7, 12.8)  | 16.4 (14.2, 18.5) | 9.1 (6.4, 11.6)  |
| <b>Senegal</b>      |         |       |                   |                  |                |                |                   |                |                   |                   |                |                   |                   |                  |
| Age 25-69           | 6074514 | 4020  | 10.2 (9.5, 11)    | 5 (4.6, 5.4)     | 0.8 (0.7, 1)   | 411 (334, 495) | 775 (632, 927)    | 253 (204, 303) | 76 (62, 92)       | 143 (116, 172)    | 47 (38, 56)    | 10.3 (8.7, 11.8)  | 19.3 (16.9, 22.1) | 6.3 (5.4, 7.2)   |
| Age 70+             | 284272  | 5041  | 10.2 (8.8, 11.5)  | 4.9 (4.2, 5.6)   | 0.8 (0.5, 1)   | 330 (245, 427) | 625 (465, 791)    | 171 (126, 221) | 1155 (851, 1496)  | 2165 (1607, 2732) | 598 (439, 772) | 6.6 (5.2, 7.9)    | 12.4 (9.9, 15.1)  | 3.4 (2.8, 4.1)   |
| Female              | 2412450 | 3071  | 10.3 (8.1, 12.6)  | 5.1 (3.8, 6.4)   | 0.8 (0.5, 1.2) | 258 (197, 329) | 449 (348, 566)    | 140 (108, 173) | 103 (79, 130)     | 179 (139, 225)    | 56 (44, 70)    | 8.4 (6.9, 10.3)   | 14.6 (12.1, 17.2) | 4.6 (3.7, 5.4)   |
| Male                | 3946336 | 5974  | 10.2 (8, 12.4)    | 5 (3.7, 6.2)     | 0.8 (0.5, 1.2) | 484 (380, 595) | 951 (763, 1147)   | 284 (226, 345) | 118 (93, 145)     | 231 (186, 279)    | 71 (56, 86)    | 8.1 (6.5, 9.8)    | 15.9 (13.1, 18.6) | 4.8 (3.9, 5.7)   |
| All                 | 6358786 | 9023  | 10.3 (8.7, 11.8)  | 5 (4.1, 5.9)     | 0.8 (0.6, 1.1) | 741 (621, 871) | 1400 (1190, 1631) | 424 (356, 493) | 112 (93, 130)     | 210 (178, 244)    | 65 (55, 76)    | 8.2 (7.1, 9.3)    | 15.5 (13.5, 17.4) | 4.7 (4.1, 5.3)   |
| <b>Serbia</b>       |         |       |                   |                  |                |                |                   |                |                   |                   |                |                   |                   |                  |
| Age 25-69           | 2298824 | 772   | 8.8 (8.1, 9.5)    | 10.4 (9.6, 11.2) | 1 (0.9, 1)     | 15 (11, 21)    | 123 (100, 145)    | 36 (25, 47)    | 6 (4, 8)          | 46 (37, 53)       | 14 (10, 18)    | 2 (1.5, 2.5)      | 15.9 (13.7, 18.1) | 4.7 (3.4, 6)     |
| Age 70+             | 83966   | 273   | 8.8 (7.7, 10)     | 10 (8.6, 11.4)   | 0.9 (0.8, 1)   | 4 (2, 6)       | 31 (22, 42)       | 8 (4, 13)      | 43 (24, 70)       | 367 (258, 499)    | 96 (48, 159)   | 1.3 (0.6, 2)      | 11.3 (8.2, 14.3)  | 2.9 (1.3, 4.5)   |
| Female              | 1208371 | 487   | 9 (7, 11)         | 10.4 (8.1, 12.8) | 1 (0.6, 1.4)   | 9 (6, 13)      | 70 (53, 87)       | 21 (13, 29)    | 7 (5, 10)         | 52 (40, 65)       | 15 (10, 22)    | 1.9 (1.1, 2.6)    | 14.3 (11.7, 17.2) | 4.2 (2.5, 6)     |
| Male                | 1174419 | 556   | 8.7 (6.8, 10.7)   | 10.2 (7.9, 12.6) | 1 (0.6, 1.3)   | 10 (7, 14)     | 84 (67, 102)      | 24 (15, 32)    | 7 (5, 10)         | 62 (49, 75)       | 17 (11, 24)    | 1.8 (1.1, 2.5)    | 15 (12, 18)       | 4.2 (2.4, 6)     |
| All                 | 2382790 | 1046  | 8.9 (7.5, 10.2)   | 10.3 (8.7, 12)   | 1 (0.7, 1.2)   | 19 (14, 24)    | 153 (129, 179)    | 44 (33, 56)    | 7 (5, 9)          | 57 (48, 66)       | 16 (12, 21)    | 1.8 (1.3, 2.3)    | 14.7 (12.7, 16.7) | 4.2 (3, 5.6)     |
| <b>Seychelles</b>   |         |       |                   |                  |                |                |                   |                |                   |                   |                |                   |                   |                  |
| Age 25-69           | 5442439 | 6617  | 17.5 (16, 19)     | 3.8 (3.5, 4.1)   | 1 (0.8, 1.1)   | 197 (125, 302) | 352 (235, 502)    | 383 (315, 463) | 36 (23, 54)       | 64 (43, 91)       | 69 (57, 84)    | 3 (2.1, 3.8)      | 5.3 (4, 6.5)      | 5.8 (5.1, 6.4)   |
| Age 70+             | 514908  | 10445 | 17.4 (15, 19.7)   | 3.7 (3.1, 4.2)   | 0.9 (0.7, 1.2) | 199 (111, 326) | 400 (244, 607)    | 369 (288, 465) | 390 (216, 643)    | 782 (470, 1180)   | 721 (560, 907) | 1.9 (0.9, 2.9)    | 3.8 (2.2, 5.4)    | 3.5 (2.8, 4.3)   |
| Female              | 3068607 | 7431  | 17.7 (13.9, 21.5) | 3.8 (2.8, 4.9)   | 1 (0.6, 1.4)   | 161 (96, 269)  | 299 (185, 464)    | 311 (242, 388) | 75 (41, 136)      | 142 (82, 236)     | 144 (109, 188) | 2.2 (1.4, 3)      | 4 (2.7, 5.3)      | 4.2 (3.6, 4.8)   |
| Male                | 2888740 | 9636  | 17.3 (13.6, 21)   | 3.8 (2.8, 4.7)   | 1 (0.6, 1.3)   | 235 (140, 357) | 453 (293, 638)    | 442 (365, 533) | 105 (62, 171)     | 207 (132, 304)    | 196 (158, 240) | 2.4 (1.5, 3.4)    | 4.7 (3.2, 6.2)    | 4.6 (3.9, 5.3)   |
| All                 | 5957347 | 17117 | 17.5 (14.9, 20.2) | 3.8 (3.1, 4.5)   | 1 (0.7, 1.2)   | 396 (272, 555) | 752 (542, 986)    | 753 (652, 874) | 90 (60, 129)      | 174 (122, 237)    | 169 (144, 200) | 2.3 (1.8, 2.9)    | 4.4 (3.4, 5.3)    | 4.4 (4, 4.9)     |
| <b>Sierra Leone</b> |         |       |                   |                  |                |                |                   |                |                   |                   |                |                   |                   |                  |
| Age 25-69           | 22475   | 27    | 15.3 (14, 16.6)   | 3.1 (2.9, 3.4)   | 0.7 (0.6, 0.9) | 4 (4, 5)       | 5 (4, 6)          | 2 (1, 2)       | 193 (160, 225)    | 215 (179, 251)    | 73 (54, 95)    | 16.5 (14.3, 18.6) | 18.4 (16.1, 20.7) | 6.2 (4.8, 7.8)   |
| Age 70+             | 1083    | 18    | 15.2 (12.9, 17.4) | 3 (2.5, 3.5)     | 0.7 (0.4, 0.9) | 2 (2, 2)       | 2 (2, 3)          | 1 (0, 1)       | 1916 (1506, 2334) | 2131 (1673, 2591) | 636 (399, 909) | 11.2 (8.6, 13.7)  | 12.5 (9.6, 15.4)  | 3.8 (2.1, 5.4)   |
| Female              | 12155   | 15    | 15.5 (12.1, 18.8) | 3.2 (2.3, 4)     | 0.7 (0.4, 1.1) | 2 (2, 3)       | 2 (2, 3)          | 1 (1, 1)       | 185 (150, 222)    | 197 (160, 237)    | 65 (45, 89)    | 14 (11.7, 16.5)   | 15 (12.3, 17.7)   | 5 (3.3, 6.7)     |
| Male                | 11403   | 30    | 15.1 (11.9, 18.4) | 3.1 (2.2, 3.9)   | 0.7 (0.4, 1.1) | 4 (4, 5)       | 5 (4, 6)          | 2 (1, 2)       | 376 (315, 444)    | 427 (358, 503)    | 138 (99, 179)  | 14.6 (11.8, 17.3) | 16.6 (13.6, 19.6) | 5.4 (3.5, 7.2)   |
| All                 | 23558   | 45    | 15.3 (13, 17.7)   | 3.1 (2.5, 3.7)   | 0.7 (0.5, 1)   | 6 (6, 7)       | 7 (6, 8)          | 2 (2, 3)       | 278 (242, 316)    | 310 (270, 352)    | 101 (78, 125)  | 14.4 (12.5, 16.3) | 16.1 (13.9, 18.2) | 5.2 (3.9, 6.5)   |
| <b>Singapore</b>    |         |       |                   |                  |                |                |                   |                |                   |                   |                |                   |                   |                  |
| Age 25-69           | 1493032 | 668   | 11.7 (11.5, 11.9) | 3.5 (3.3, 3.8)   | 1.1 (1, 1.1)   | 81 (67, 98)    | 133 (110, 159)    | 26 (17, 35)    | 49 (41, 59)       | 81 (67, 96)       | 16 (11, 21)    | 12.1 (10.5, 13.8) | 19.9 (17.5, 22.5) | 3.8 (2.5, 5.2)   |
| Age 70+             | 49359   | 266   | 11.6 (11.3, 12)   | 3.4 (2.9, 3.9)   | 1 (0.9, 1.1)   | 22 (15, 30)    | 37 (26, 49)       | 6 (3, 11)      | 441 (300, 598)    | 739 (509, 982)    | 121 (53, 216)  | 8.3 (5.9, 10.6)   | 13.9 (10.2, 17.7) | 2.3 (0.8, 3.8)   |
| Female              | 784424  | 386   | 11.9 (9.3, 14.4)  | 3.6 (2.6, 4.5)   | 1.1 (0.7, 1.5) | 43 (34, 54)    | 69 (54, 85)       | 13 (7, 19)     | 49 (38, 61)       | 78 (61, 96)       | 15 (8, 22)     | 11.1 (9, 13.4)    | 17.8 (14.9, 20.8) | 3.3 (1.8, 4.8)   |
| Male                | 757967  | 550   | 11.6 (9, 14.1)    | 3.5 (2.5, 4.4)   | 1.1 (0.7, 1.4) | 60 (46, 74)    | 101 (80, 123)     | 19 (12, 27)    | 67 (53, 82)       | 113 (90, 137)     | 21 (13, 31)    | 10.9 (8.8, 13)    | 18.4 (15.4, 21.5) | 3.4 (1.8, 5)     |
| All                 | 1542391 | 932   | 11.7 (9.9, 13.5)  | 3.5 (2.8, 4.2)   | 1.1 (0.8, 1.3) | 103 (87, 121)  | 170 (144, 198)    | 32 (22, 42)    | 58 (49, 68)       | 95 (81, 111)      | 18 (13, 24)    | 11 (9.5, 12.6)    | 18.3 (15.8, 20.7) | 3.4 (2.3, 4.5)   |
| <b>Slovakia</b>     |         |       |                   |                  |                |                |                   |                |                   |                   |                |                   |                   |                  |

|                        |          |       |                   |                 |                |                   |                   |                   |                   |                   |                   |                   |                   |                  |
|------------------------|----------|-------|-------------------|-----------------|----------------|-------------------|-------------------|-------------------|-------------------|-------------------|-------------------|-------------------|-------------------|------------------|
| Age 25-69              | 1540900  | 1265  | 15.2 (14.1, 16.3) | 7.4 (6.9, 7.9)  | 1.4 (1.4, 1.5) | 47 (36, 58)       | 228 (191, 266)    | 86 (74, 99)       | 39 (31, 48)       | 189 (158, 221)    | 71 (61, 82)       | 3.7 (3, 4.3)      | 18 (16, 20.1)     | 6.8 (6, 7.6)     |
| Age 70+                | 94800    | 1256  | 15.1 (13.4, 16.9) | 7.1 (6.3, 8)    | 1.3 (1.2, 1.4) | 34 (25, 45)       | 162 (129, 192)    | 55 (46, 65)       | 376 (274, 498)    | 1770 (1410, 2112) | 598 (499, 709)    | 2.7 (1.9, 3.6)    | 12.9 (10.2, 15.5) | 4.4 (3.6, 5.2)   |
| Female                 | 814800   | 1029  | 15.3 (12, 18.5)   | 7.4 (5.7, 9.2)  | 1.4 (1, 1.9)   | 34 (25, 43)       | 149 (121, 179)    | 54 (46, 64)       | 52 (38, 66)       | 227 (183, 272)    | 83 (70, 97)       | 3.3 (2.5, 4.1)    | 14.5 (12.3, 16.9) | 5.3 (4.5, 6)     |
| Male                   | 820900   | 1492  | 15.1 (11.9, 18.4) | 7.3 (5.6, 9.1)  | 1.4 (1, 1.8)   | 47 (37, 59)       | 241 (200, 283)    | 87 (75, 100)      | 76 (59, 95)       | 386 (321, 452)    | 139 (120, 160)    | 3.2 (2.4, 3.9)    | 16.2 (13.6, 18.8) | 5.8 (5, 6.7)     |
| All                    | 1635700  | 2520  | 15.2 (12.9, 17.5) | 7.4 (6.1, 8.6)  | 1.4 (1.1, 1.7) | 81 (67, 96)       | 390 (339, 438)    | 141 (125, 157)    | 64 (52, 76)       | 305 (264, 343)    | 110 (98, 122)     | 3.2 (2.7, 3.8)    | 15.5 (13.7, 17.3) | 5.6 (5, 6.2)     |
| <b>Slovenia</b>        |          |       |                   |                 |                |                   |                   |                   |                   |                   |                   |                   |                   |                  |
| Age 25-69              | 2811666  | 6211  | 11.2 (10.8, 11.6) | 8.8 (8.2, 9.4)  | 1.2 (1.1, 1.2) | 630 (486, 788)    | 630 (486, 788)    | 632 (542, 728)    | 233 (179, 289)    | 233 (180, 289)    | 235 (201, 270)    | 10.1 (8.6, 11.6)  | 10.1 (8.5, 11.7)  | 10.2 (9.2, 11.1) |
| Age 70+                | 318155   | 12115 | 11.2 (10.5, 12)   | 8.5 (7.3, 9.6)  | 1.1 (1, 1.2)   | 880 (627, 1151)   | 880 (627, 1151)   | 779 (644, 943)    | 2768 (1951, 3670) | 2768 (1951, 3670) | 2453 (2009, 2995) | 7.2 (5.4, 9)      | 7.3 (5.3, 9.3)    | 6.4 (5.3, 7.5)   |
| Female                 | 1647768  | 8852  | 11.3 (8.8, 13.8)  | 8.9 (6.8, 10.9) | 1.2 (0.8, 1.6) | 682 (473, 909)    | 682 (473, 909)    | 633 (513, 780)    | 484 (327, 658)    | 484 (327, 658)    | 447 (357, 559)    | 7.7 (6.3, 9.1)    | 7.7 (6.1, 9.3)    | 7.2 (6.3, 8)     |
| Male                   | 1482053  | 9494  | 11.1 (8.7, 13.6)  | 8.6 (6.6, 10.6) | 1.2 (0.8, 1.6) | 827 (649, 1045)   | 828 (649, 1045)   | 778 (666, 893)    | 588 (458, 746)    | 588 (458, 746)    | 554 (475, 636)    | 8.7 (6.9, 10.5)   | 8.7 (6.9, 10.5)   | 8.2 (7.1, 9.2)   |
| All                    | 3129821  | 18313 | 11.2 (9.5, 13)    | 8.7 (7.3, 10.2) | 1.2 (0.9, 1.4) | 1510 (1211, 1816) | 1510 (1211, 1816) | 1412 (1245, 1597) | 533 (422, 648)    | 533 (422, 648)    | 498 (439, 564)    | 8.2 (7, 9.4)      | 8.2 (7.1, 9.5)    | 7.7 (7, 8.4)     |
| <b>Solomon Islands</b> |          |       |                   |                 |                |                   |                   |                   |                   |                   |                   |                   |                   |                  |
| Age 25-69              | 1155143  | 1154  | 23.9 (21.9, 25.7) | 1.7 (1.6, 1.9)  | 0.7 (0.6, 0.9) | 45 (31, 62)       | 90 (66, 116)      | 90 (76, 104)      | 45 (30, 63)       | 91 (65, 118)      | 90 (76, 105)      | 3.9 (2.9, 4.8)    | 7.8 (6.3, 9.3)    | 7.8 (7, 8.6)     |
| Age 70+                | 133663   | 2918  | 23.6 (20.8, 26.5) | 1.7 (1.4, 1.9)  | 0.7 (0.5, 0.9) | 79 (45, 129)      | 159 (103, 228)    | 137 (107, 172)    | 596 (343, 971)    | 1200 (781, 1723)  | 1032 (818, 1291)  | 2.7 (1.6, 3.9)    | 5.5 (3.6, 7.3)    | 4.7 (3.8, 5.6)   |
| Female                 | 681038   | 2106  | 24.1 (19, 29.2)   | 1.8 (1.2, 2.4)  | 0.7 (0.4, 1.1) | 63 (34, 110)      | 118 (70, 180)     | 108 (83, 139)     | 133 (67, 246)     | 249 (139, 396)    | 226 (168, 298)    | 3 (2.1, 3.9)      | 5.6 (4.3, 6.9)    | 5.1 (4.5, 5.8)   |
| Male                   | 607768   | 1957  | 23.6 (18.6, 28.6) | 1.7 (1.2, 2.3)  | 0.7 (0.4, 1.1) | 61 (41, 87)       | 132 (97, 172)     | 118 (100, 139)    | 132 (88, 192)     | 286 (206, 381)    | 254 (215, 300)    | 3.1 (2.1, 4.1)    | 6.7 (5, 8.3)      | 6 (5.2, 6.9)     |
| All                    | 1288806  | 4070  | 23.8 (20.3, 27.4) | 1.7 (1.3, 2.2)  | 0.7 (0.5, 1)   | 124 (87, 177)     | 250 (189, 323)    | 227 (195, 262)    | 132 (90, 194)     | 267 (198, 352)    | 240 (204, 281)    | 3 (2.4, 3.7)      | 6.1 (5.1, 7.2)    | 5.6 (5, 6.1)     |
| <b>Somalia</b>         |          |       |                   |                 |                |                   |                   |                   |                   |                   |                   |                   |                   |                  |
| Age 25-69              | 101458   | 110   | 10.4 (9.6, 11.2)  | 4 (3.7, 4.3)    | 0.7 (0.6, 0.8) | 25 (19, 33)       | 25 (19, 33)       | 4 (2, 6)          | 240 (177, 311)    | 240 (177, 311)    | 40 (23, 58)       | 23.1 (20.3, 26.1) | 23 (20.1, 25.9)   | 3.8 (2.5, 5)     |
| Age 70+                | 5037     | 40    | 10.3 (9.1, 11.6)  | 3.9 (3.3, 4.4)  | 0.7 (0.5, 0.8) | 6 (3, 9)          | 6 (3, 9)          | 1 (0, 2)          | 1224 (646, 1862)  | 1224 (646, 1862)  | 173 (69, 323)     | 15.6 (12.4, 19)   | 15.7 (12.5, 19)   | 2.2 (1, 3.4)     |
| Female                 | 51936    | 49    | 10.5 (8.2, 12.8)  | 4 (2.9, 5.1)    | 0.7 (0.4, 1.1) | 10 (7, 13)        | 10 (7, 13)        | 2 (1, 3)          | 196 (131, 265)    | 196 (131, 265)    | 33 (17, 53)       | 20.2 (16.8, 23.6) | 20.3 (16.7, 23.8) | 3.4 (1.9, 4.9)   |
| Male                   | 54559    | 102   | 10.2 (8, 12.5)    | 3.9 (2.9, 5)    | 0.7 (0.4, 1)   | 22 (15, 29)       | 22 (15, 29)       | 3 (2, 5)          | 364 (253, 490)    | 364 (253, 490)    | 58 (31, 92)       | 21.4 (17.8, 25.3) | 21.4 (17.7, 24.9) | 3.4 (1.8, 5)     |
| All                    | 106495   | 150   | 10.4 (8.8, 12)    | 4 (3.2, 4.7)    | 0.7 (0.5, 0.9) | 32 (24, 39)       | 32 (24, 39)       | 5 (3, 7)          | 282 (216, 349)    | 282 (216, 349)    | 45 (29, 64)       | 21.1 (18.4, 23.6) | 21.1 (18.4, 23.8) | 3.4 (2.3, 4.5)   |
| <b>South Africa</b>    |          |       |                   |                 |                |                   |                   |                   |                   |                   |                   |                   |                   |                  |
| Age 25-69              | 2246731  | 1262  | 8.1 (8, 8.2)      | 4.8 (4.8, 4.9)  | 1.2 (1.1, 1.3) | 23 (16, 31)       | 226 (173, 287)    | 44 (29, 61)       | 10 (7, 13)        | 99 (75, 125)      | 19 (13, 27)       | 1.8 (1.4, 2.3)    | 17.9 (15.7, 20.2) | 3.4 (2.5, 4.4)   |
| Age 70+                | 107938   | 811   | 8.1 (7.9, 8.3)    | 4.7 (4.6, 4.8)  | 1.1 (1, 1.2)   | 10 (6, 16)        | 101 (74, 133)     | 17 (9, 26)        | 95 (58, 145)      | 952 (697, 1245)   | 157 (83, 247)     | 1.2 (0.7, 1.8)    | 12.5 (9.7, 15.5)  | 2.1 (1, 3.1)     |
| Female                 | 1209815  | 922   | 8.2 (6.4, 10.1)   | 4.9 (3.7, 6.1)  | 1.2 (0.8, 1.6) | 15 (10, 22)       | 138 (102, 180)    | 26 (15, 39)       | 12 (8, 18)        | 110 (81, 143)     | 21 (12, 31)       | 1.7 (1.1, 2.2)    | 14.9 (12.2, 17.6) | 2.8 (1.7, 3.9)   |
| Male                   | 1144854  | 1154  | 8 (6.2, 9.8)      | 4.8 (3.6, 6)    | 1.2 (0.8, 1.6) | 17 (12, 24)       | 190 (145, 239)    | 35 (22, 50)       | 15 (10, 20)       | 162 (123, 206)    | 30 (19, 42)       | 1.5 (0.9, 2)      | 16.4 (13.5, 19.6) | 3 (1.7, 4.2)     |
| All                    | 2354669  | 2081  | 8.1 (6.8, 9.4)    | 4.8 (4, 5.7)    | 1.2 (0.9, 1.5) | 33 (25, 42)       | 327 (264, 391)    | 61 (43, 79)       | 14 (10, 18)       | 135 (109, 162)    | 25 (18, 33)       | 1.6 (1.2, 1.9)    | 15.7 (13.7, 17.8) | 2.9 (2.1, 3.7)   |
| <b>South Korea</b>     |          |       |                   |                 |                |                   |                   |                   |                   |                   |                   |                   |                   |                  |
| Age 25-69              | 14361422 | 8887  | 10.4 (9.6, 11.2)  | 4.3 (3.9, 4.6)  | 1.1 (1, 1.1)   | 135 (111, 162)    | 1426 (1193, 1688) | 722 (596, 858)    | 10 (8, 12)        | 110 (91, 130)     | 55 (45, 66)       | 1.5 (1.3, 1.7)    | 16.1 (14.2, 18.1) | 8.1 (7.1, 9.2)   |
| Age 70+                | 669398   | 7330  | 10.4 (9.1, 11.7)  | 4.1 (3.6, 4.7)  | 1 (0.9, 1.1)   | 71 (53, 91)       | 806 (620, 1011)   | 364 (279, 467)    | 107 (80, 137)     | 1217 (933, 1523)  | 549 (420, 703)    | 1 (0.7, 1.2)      | 11 (8.4, 13.4)    | 4.9 (3.8, 6.1)   |
| Female                 | 7721813  | 6729  | 10.6 (8.2, 12.9)  | 4.3 (3.2, 5.4)  | 1.1 (0.7, 1.5) | 78 (61, 98)       | 842 (665, 1049)   | 409 (321, 510)    | 12 (9, 15)        | 128 (101, 161)    | 62 (49, 78)       | 1.2 (0.9, 1.4)    | 12.5 (10.4, 14.5) | 6.1 (5, 7.2)     |
| Male                   | 7309007  | 9529  | 10.3 (8, 12.6)    | 4.2 (3.1, 5.3)  | 1.1 (0.7, 1.4) | 128 (101, 155)    | 1390 (1109, 1659) | 677 (545, 814)    | 19 (15, 23)       | 211 (168, 252)    | 102 (82, 123)     | 1.3 (1.1, 1.6)    | 14.6 (12.1, 17.2) | 7.1 (5.8, 8.5)   |
| All                    | 15030820 | 16272 | 10.4 (8.8, 12)    | 4.3 (3.5, 5)    | 1.1 (0.8, 1.3) | 206 (173, 240)    | 2232 (1906, 2572) | 1086 (940, 1245)  | 15 (13, 18)       | 168 (144, 194)    | 82 (70, 94)       | 1.3 (1.1, 1.4)    | 13.7 (12.2, 15.3) | 6.7 (5.8, 7.6)   |
| <b>Spain</b>           |          |       |                   |                 |                |                   |                   |                   |                   |                   |                   |                   |                   |                  |
| Age 25-69              | 21912160 | 10466 | 11.7 (11.3, 12)   | 6.3 (5.8, 6.7)  | 0.9 (0.9, 1)   | 202 (159, 258)    | 1853 (1601, 2128) | 773 (672, 882)    | 12 (9, 15)        | 108 (92, 126)     | 45 (39, 52)       | 1.9 (1.5, 2.4)    | 17.7 (15.6, 19.7) | 7.4 (6.7, 8.1)   |
| Age 70+                | 1247635  | 14368 | 11.7 (11, 12.3)   | 6 (5.3, 6.9)    | 0.9 (0.8, 0.9) | 192 (119, 291)    | 1680 (1252, 2092) | 598 (479, 735)    | 166 (104, 251)    | 1454 (1081, 1824) | 514 (406, 632)    | 1.3 (0.8, 1.9)    | 11.7 (9.1, 14.3)  | 4.2 (3.4, 4.9)   |

|                    |          |       |                   |                |                |                   |                   |                   |                   |                   |                 |                   |                   |                |
|--------------------|----------|-------|-------------------|----------------|----------------|-------------------|-------------------|-------------------|-------------------|-------------------|-----------------|-------------------|-------------------|----------------|
| Female             | 11908605 | 12470 | 11.8 (9.3, 14.4)  | 6.3 (4.8, 7.8) | 0.9 (0.6, 1.3) | 205 (134, 298)    | 1618 (1244, 2021) | 624 (507, 748)    | 29 (18, 46)       | 232 (167, 301)    | 87 (67, 108)    | 1.6 (1.2, 2.1)    | 13 (11, 15.1)     | 5 (4.4, 5.7)   |
| Male               | 11251190 | 12389 | 11.5 (9, 14)      | 6.2 (4.7, 7.7) | 0.9 (0.5, 1.3) | 190 (141, 254)    | 1914 (1609, 2233) | 747 (643, 853)    | 26 (19, 37)       | 271 (221, 323)    | 102 (87, 118)   | 1.5 (1.1, 2)      | 15.5 (12.9, 18.1) | 6 (5.2, 6.9)   |
| All                | 23159795 | 24831 | 11.7 (9.9, 13.5)  | 6.2 (5.2, 7.3) | 0.9 (0.7, 1.2) | 395 (307, 503)    | 3533 (3040, 4021) | 1371 (1205, 1529) | 28 (21, 38)       | 251 (210, 292)    | 94 (81, 108)    | 1.6 (1.2, 1.9)    | 14.2 (12.7, 15.7) | 5.5 (5, 6)     |
| <b>Sri Lanka</b>   |          |       |                   |                |                |                   |                   |                   |                   |                   |                 |                   |                   |                |
| Age 25-69          | 21088901 | 14549 | 21.7 (20.1, 23.4) | 1.6 (1.5, 1.8) | 0.8 (0.7, 0.9) | 578 (421, 772)    | 1813 (1453, 2190) | 758 (640, 883)    | 26 (19, 35)       | 82 (66, 98)       | 34 (29, 39)     | 4 (3.2, 4.8)      | 12.5 (10.8, 14.1) | 5.2 (4.6, 5.7) |
| Age 70+            | 3512957  | 45473 | 21.6 (18.9, 24.3) | 1.6 (1.3, 1.8) | 0.7 (0.6, 0.9) | 1313 (842, 1902)  | 3985 (2941, 5088) | 1392 (1090, 1724) | 414 (260, 614)    | 1256 (911, 1623)  | 435 (337, 541)  | 2.9 (1.8, 3.9)    | 8.8 (6.8, 10.8)   | 3.1 (2.4, 3.6) |
| Female             | 12875094 | 29055 | 21.9 (17.3, 26.6) | 1.7 (1.1, 2.2) | 0.8 (0.4, 1.1) | 921 (535, 1449)   | 2594 (1731, 3573) | 962 (718, 1245)   | 91 (49, 151)      | 254 (164, 360)    | 93 (66, 124)    | 3.2 (2.3, 4)      | 8.9 (7.4, 10.5)   | 3.3 (2.9, 3.8) |
| Male               | 11726764 | 30961 | 21.5 (16.9, 26)   | 1.6 (1.1, 2.1) | 0.8 (0.4, 1.1) | 969 (694, 1325)   | 3205 (2533, 3925) | 1188 (991, 1391)  | 96 (66, 136)      | 316 (240, 397)    | 114 (94, 138)   | 3.1 (2.2, 4)      | 10.4 (8.5, 12.2)  | 3.8 (3.2, 4.4) |
| All                | 24601858 | 60017 | 21.7 (18.4, 24.9) | 1.6 (1.2, 2)   | 0.8 (0.5, 1)   | 1890 (1380, 2531) | 5798 (4701, 6993) | 2149 (1825, 2495) | 93 (65, 130)      | 284 (225, 350)    | 103 (86, 123)   | 3.2 (2.6, 3.8)    | 9.7 (8.4, 10.9)   | 3.6 (3.2, 3.9) |
| <b>Sudan</b>       |          |       |                   |                |                |                   |                   |                   |                   |                   |                 |                   |                   |                |
| Age 25-69          | 7864810  | 8474  | 10.5 (9.7, 11.4)  | 5.2 (4.7, 5.6) | 1.1 (0.8, 1.3) | 1849 (1567, 2143) | 1849 (1567, 2143) | 337 (243, 448)    | 268 (226, 313)    | 268 (226, 313)    | 49 (35, 65)     | 21.8 (19.5, 24.2) | 21.8 (19.4, 24.2) | 4 (3, 5)       |
| Age 70+            | 587417   | 9496  | 10.4 (9.1, 11.7)  | 5 (4.2, 5.7)   | 1 (0.6, 1.4)   | 1452 (1154, 1732) | 1452 (1154, 1732) | 227 (137, 329)    | 2514 (1976, 3009) | 2514 (1976, 3009) | 393 (233, 574)  | 15.3 (12.3, 18.3) | 15.3 (12.1, 18.4) | 2.4 (1.3, 3.4) |
| Female             | 4212689  | 6288  | 10.6 (8.3, 12.9)  | 5.2 (3.9, 6.5) | 1.1 (0.7, 1.5) | 1091 (882, 1295)  | 1091 (882, 1295)  | 192 (125, 270)    | 334 (266, 400)    | 334 (266, 400)    | 58 (36, 83)     | 17.4 (14.8, 20.1) | 17.4 (14.7, 20)   | 3.1 (2, 4.1)   |
| Male               | 4239538  | 11670 | 10.4 (8.1, 12.7)  | 5.1 (3.9, 6.4) | 1 (0.7, 1.4)   | 2209 (1846, 2546) | 2209 (1846, 2546) | 372 (252, 502)    | 601 (499, 693)    | 601 (499, 693)    | 101 (67, 137)   | 18.9 (16.2, 21.7) | 18.9 (16.1, 21.9) | 3.2 (2.1, 4.2) |
| All                | 8452227  | 17951 | 10.5 (8.9, 12.1)  | 5.2 (4.2, 6.1) | 1.1 (0.8, 1.3) | 3300 (2889, 3723) | 3300 (2889, 3723) | 564 (425, 711)    | 463 (404, 523)    | 463 (404, 523)    | 79 (59, 100)    | 18.4 (16.4, 20.3) | 18.4 (16.5, 20.3) | 3.1 (2.4, 3.9) |
| <b>Suriname</b>    |          |       |                   |                |                |                   |                   |                   |                   |                   |                 |                   |                   |                |
| Age 25-69          | 9262440  | 3785  | 7.6 (7, 8.2)      | 5.2 (4.8, 5.6) | 0.5 (0.4, 0.6) | 85 (61, 117)      | 575 (462, 694)    | 273 (186, 369)    | 9 (7, 13)         | 62 (50, 75)       | 30 (20, 40)     | 2.3 (1.7, 2.9)    | 15.2 (13.1, 17.2) | 7.3 (5.2, 9.3) |
| Age 70+            | 452466   | 3075  | 7.6 (6.7, 8.5)    | 5 (4.4, 5.6)   | 0.5 (0.4, 0.6) | 47 (28, 71)       | 325 (238, 412)    | 139 (76, 217)     | 105 (62, 157)     | 723 (528, 922)    | 310 (170, 479)  | 1.5 (0.9, 2.3)    | 10.6 (8, 13.1)    | 4.5 (2.2, 6.8) |
| Female             | 4926084  | 3262  | 7.7 (6, 9.4)      | 5.3 (3.9, 6.6) | 0.5 (0.2, 0.8) | 64 (43, 92)       | 408 (315, 521)    | 196 (114, 285)    | 14 (9, 20)        | 86 (66, 110)      | 41 (24, 60)     | 2 (1.3, 2.6)      | 12.5 (10.2, 14.8) | 6 (3.5, 8.4)   |
| Male               | 4788822  | 3580  | 7.5 (5.9, 9.2)    | 5.1 (3.8, 6.4) | 0.5 (0.2, 0.8) | 68 (46, 94)       | 491 (394, 596)    | 217 (141, 298)    | 15 (10, 20)       | 106 (85, 129)     | 47 (31, 64)     | 1.9 (1.2, 2.7)    | 13.7 (11, 16.5)   | 6 (3.6, 8.4)   |
| All                | 9714906  | 6831  | 7.6 (6.4, 8.8)    | 5.2 (4.3, 6.1) | 0.5 (0.3, 0.7) | 132 (103, 172)    | 899 (753, 1055)   | 413 (298, 524)    | 14 (11, 18)       | 96 (80, 113)      | 44 (32, 56)     | 1.9 (1.4, 2.4)    | 13.2 (11.5, 14.9) | 6 (4.4, 7.9)   |
| <b>Swaziland</b>   |          |       |                   |                |                |                   |                   |                   |                   |                   |                 |                   |                   |                |
| Age 25-69          | 175072   | 197   | 10 (9.2, 10.8)    | 2.7 (2.4, 3)   | 0.7 (0.5, 0.8) | 3 (3, 4)          | 30 (25, 35)       | 3 (2, 4)          | 21 (15, 27)       | 181 (152, 212)    | 18 (12, 26)     | 1.7 (1.3, 2.2)    | 15.1 (13.1, 17)   | 1.5 (1, 2)     |
| Age 70+            | 11531    | 214   | 9.9 (8.6, 11.2)   | 2.6 (2.2, 3)   | 0.6 (0.4, 0.9) | 2 (2, 4)          | 22 (17, 28)       | 2 (1, 3)          | 193 (127, 299)    | 1832 (1439, 2288) | 148 (71, 243)   | 1.1 (0.6, 1.6)    | 10.4 (8.1, 12.7)  | 0.8 (0.4, 1.3) |
| Female             | 93571    | 188   | 10.1 (7.9, 12.3)  | 2.7 (1.9, 3.5) | 0.7 (0.3, 1)   | 3 (2, 4)          | 22 (18, 28)       | 2 (1, 3)          | 31 (20, 47)       | 274 (216, 338)    | 25 (15, 39)     | 1.3 (0.9, 1.9)    | 12 (9.8, 14.1)    | 1.1 (0.6, 1.6) |
| Male               | 93032    | 224   | 9.9 (7.7, 12.1)   | 2.7 (1.9, 3.4) | 0.7 (0.3, 1)   | 3 (2, 4)          | 30 (24, 35)       | 3 (2, 4)          | 37 (26, 51)       | 342 (279, 402)    | 31 (19, 47)     | 1.4 (0.9, 1.9)    | 13.2 (10.8, 15.4) | 1.2 (0.7, 1.7) |
| All                | 186603   | 412   | 10 (8.4, 11.6)    | 2.7 (2.1, 3.2) | 0.7 (0.4, 0.9) | 6 (4, 7)          | 52 (45, 60)       | 5 (3, 6)          | 34 (26, 43)       | 308 (263, 354)    | 28 (19, 38)     | 1.4 (1, 1.7)      | 12.6 (11.1, 14.2) | 1.2 (0.8, 1.5) |
| <b>Sweden</b>      |          |       |                   |                |                |                   |                   |                   |                   |                   |                 |                   |                   |                |
| Age 25-69          | 265651   | 121   | 15 (14.8, 15.3)   | 4.8 (4.7, 4.9) | 1 (1, 1.1)     | 1 (1, 2)          | 24 (19, 28)       | 4 (2, 5)          | 5 (4, 7)          | 89 (72, 108)      | 14 (8, 21)      | 1.1 (0.8, 1.4)    | 19.7 (17.1, 22.2) | 3.1 (2, 4.2)   |
| Age 70+            | 13155    | 106   | 15 (14.6, 15.4)   | 4.6 (4.4, 4.8) | 0.9 (0.9, 1)   | 1 (1, 1)          | 15 (11, 19)       | 2 (1, 4)          | 64 (40, 94)       | 1157 (865, 1479)  | 155 (70, 276)   | 0.8 (0.4, 1.1)    | 14 (10.6, 17.3)   | 1.9 (0.6, 3.1) |
| Female             | 159300   | 111   | 15.2 (11.9, 18.4) | 4.8 (3.6, 6)   | 1 (0.6, 1.4)   | 1 (1, 2)          | 18 (14, 23)       | 3 (1, 4)          | 8 (5, 11)         | 133 (103, 169)    | 20 (10, 31)     | 1 (0.6, 1.3)      | 16.4 (13.6, 19.3) | 2.5 (1.2, 3.7) |
| Male               | 119506   | 116   | 14.9 (11.7, 18.1) | 4.7 (3.5, 5.9) | 1 (0.6, 1.4)   | 1 (1, 2)          | 20 (16, 25)       | 3 (2, 5)          | 9 (6, 13)         | 162 (125, 201)    | 24 (13, 37)     | 1 (0.6, 1.3)      | 17.6 (14.3, 20.9) | 2.6 (1.2, 3.9) |
| All                | 278806   | 227   | 15 (12.7, 17.3)   | 4.8 (3.9, 5.6) | 1 (0.7, 1.3)   | 2 (2, 3)          | 39 (33, 45)       | 6 (4, 8)          | 8 (6, 11)         | 147 (124, 172)    | 22 (14, 30)     | 1 (0.7, 1.2)      | 17 (15, 19.2)     | 2.5 (1.6, 3.4) |
| <b>Switzerland</b> |          |       |                   |                |                |                   |                   |                   |                   |                   |                 |                   |                   |                |
| Age 25-69          | 4781895  | 5617  | 11.5 (11.3, 11.7) | 5.3 (5, 5.7)   | 1.7 (1.6, 1.8) | 559 (444, 666)    | 832 (660, 993)    | 333 (279, 393)    | 135 (106, 162)    | 201 (158, 240)    | 80 (67, 95)     | 10 (8.8, 11)      | 14.8 (13, 16.5)   | 5.9 (5.4, 6.5) |
| Age 70+            | 1070284  | 25534 | 11.4 (11, 11.9)   | 5.1 (4.5, 5.8) | 1.6 (1.5, 1.7) | 1872 (1422, 2342) | 2728 (2085, 3390) | 951 (775, 1160)   | 1938 (1431, 2450) | 2819 (2107, 3549) | 975 (784, 1192) | 7.3 (5.7, 8.9)    | 10.7 (8.4, 13.1)  | 3.7 (3.1, 4.4) |
| Female             | 3011895  | 13921 | 11.6 (9.1, 14.1)  | 5.4 (4, 6.7)   | 1.7 (1.2, 2.2) | 1071 (706, 1405)  | 1497 (1002, 1949) | 548 (411, 707)    | 391 (246, 522)    | 546 (351, 723)    | 199 (147, 260)  | 7.7 (6.5, 8.9)    | 10.8 (9.2, 12.2)  | 3.9 (3.4, 4.4) |
| Male               | 2840284  | 17247 | 11.3 (8.9, 13.8)  | 5.3 (3.9, 6.6) | 1.7 (1.2, 2.2) | 1361 (1036, 1692) | 2062 (1585, 2545) | 736 (613, 888)    | 539 (405, 673)    | 816 (617, 1013)   | 289 (237, 349)  | 7.9 (6.7, 9.1)    | 12 (10.3, 13.7)   | 4.3 (3.7, 4.8) |



|                              |          |       |                   |                |                |                   |                   |                   |                   |                   |                   |                   |                   |                   |
|------------------------------|----------|-------|-------------------|----------------|----------------|-------------------|-------------------|-------------------|-------------------|-------------------|-------------------|-------------------|-------------------|-------------------|
| All                          | 5852179  | 31168 | 11.5 (9.7, 13.2)  | 5.3 (4.4, 6.3) | 1.7 (1.4, 2)   | 2432 (1958, 2901) | 3560 (2889, 4211) | 1284 (1101, 1499) | 464 (369, 556)    | 679 (544, 807)    | 244 (206, 286)    | 7.8 (7, 8.6)      | 11.4 (10.3, 12.5) | 4.1 (3.8, 4.5)    |
| <b>Syria</b>                 |          |       |                   |                |                |                   |                   |                   |                   |                   |                   |                   |                   |                   |
| Age 25-69                    | 3953891  | 2992  | 9.8 (9, 10.6)     | 4.2 (3.8, 4.5) | 1.2 (1, 1.4)   | 101 (71, 138)     | 421 (340, 507)    | 396 (340, 456)    | 30 (21, 41)       | 126 (101, 152)    | 118 (101, 136)    | 3.4 (2.7, 4.1)    | 14.1 (12.3, 15.7) | 13.2 (12.1, 14.4) |
| Age 70+                      | 680104   | 12425 | 9.7 (8.5, 10.9)   | 4 (3.5, 4.5)   | 1.1 (0.8, 1.4) | 305 (191, 463)    | 1226 (897, 1557)  | 1030 (839, 1246)  | 477 (299, 726)    | 1921 (1395, 2452) | 1607 (1301, 1954) | 2.5 (1.7, 3.3)    | 9.9 (7.7, 12)     | 8.3 (6.9, 9.6)    |
| Female                       | 2417953  | 7480  | 9.9 (7.7, 12.1)   | 4.2 (3.1, 5.3) | 1.2 (0.8, 1.6) | 198 (104, 336)    | 744 (484, 1025)   | 651 (488, 830)    | 96 (48, 166)      | 360 (230, 504)    | 314 (230, 408)    | 2.6 (2, 3.3)      | 9.9 (8.5, 11.5)   | 8.7 (7.7, 9.7)    |
| Male                         | 2216042  | 7944  | 9.6 (7.5, 11.8)   | 4.1 (3, 5.1)   | 1.2 (0.8, 1.6) | 208 (141, 293)    | 903 (699, 1108)   | 775 (659, 905)    | 116 (76, 165)     | 502 (385, 623)    | 428 (361, 506)    | 2.6 (1.9, 3.3)    | 11.4 (9.6, 13.1)  | 9.7 (8.6, 10.7)   |
| All                          | 4633995  | 15426 | 9.8 (8.2, 11.3)   | 4.1 (3.4, 4.9) | 1.2 (0.9, 1.5) | 406 (286, 556)    | 1647 (1305, 1981) | 1425 (1223, 1657) | 105 (73, 146)     | 429 (337, 519)    | 369 (316, 430)    | 2.6 (2.1, 3.1)    | 10.7 (9.5, 11.9)  | 9.3 (8.5, 9.9)    |
| <b>Sao Tome and Principe</b> |          |       |                   |                |                |                   |                   |                   |                   |                   |                   |                   |                   |                   |
| Age 25-69                    | 3775432  | 7061  | 16 (14.8, 17.2)   | 2.9 (2.6, 3.1) | 1.5 (1.1, 1.8) | 106 (79, 140)     | 1242 (1039, 1472) | 607 (462, 775)    | 29 (22, 38)       | 336 (281, 397)    | 165 (127, 210)    | 1.5 (1.1, 1.9)    | 17.6 (15.4, 19.9) | 8.6 (6.7, 10.5)   |
| Age 70+                      | 251976   | 8544  | 16 (13.9, 18)     | 2.8 (2.4, 3.1) | 1.4 (0.9, 1.8) | 78 (52, 114)      | 1003 (767, 1255)  | 429 (264, 600)    | 304 (203, 439)    | 3895 (3003, 4855) | 1670 (1039, 2325) | 0.9 (0.6, 1.3)    | 11.7 (9.4, 14.2)  | 5 (3, 6.9)        |
| Female                       | 2049047  | 6589  | 16.3 (12.8, 19.8) | 2.9 (2.1, 3.8) | 1.5 (1, 1.9)   | 75 (54, 104)      | 916 (730, 1120)   | 432 (305, 571)    | 36 (26, 50)       | 439 (351, 535)    | 208 (147, 274)    | 1.1 (0.8, 1.6)    | 13.9 (11.4, 16.2) | 6.5 (4.6, 8.4)    |
| Male                         | 1978361  | 8994  | 15.8 (12.4, 19.2) | 2.8 (2, 3.6)   | 1.4 (1, 1.9)   | 109 (77, 150)     | 1328 (1090, 1576) | 604 (419, 796)    | 54 (38, 73)       | 654 (539, 773)    | 300 (213, 390)    | 1.2 (0.8, 1.6)    | 14.8 (12.1, 17.5) | 6.7 (4.8, 8.8)    |
| All                          | 4027408  | 15603 | 16 (13.6, 18.5)   | 2.9 (2.3, 3.4) | 1.5 (1.1, 1.8) | 184 (146, 231)    | 2244 (1923, 2559) | 1036 (815, 1259)  | 45 (36, 56)       | 545 (468, 621)    | 253 (200, 305)    | 1.2 (0.9, 1.5)    | 14.4 (12.6, 16.1) | 6.6 (5.2, 8)      |
| <b>Taiwan</b>                |          |       |                   |                |                |                   |                   |                   |                   |                   |                   |                   |                   |                   |
| Age 25-69                    | 10248328 | 3884  | 9.3 (9.2, 9.5)    | 7.2 (7, 7.4)   | 1.2 (1, 1.5)   | 79 (62, 99)       | 429 (346, 523)    | 321 (219, 441)    | 8 (7, 10)         | 46 (37, 55)       | 35 (24, 47)       | 2 (1.7, 2.3)      | 11 (9.5, 12.5)    | 8.2 (6.4, 10.1)   |
| Age 70+                      | 705756   | 5526  | 9.2 (9, 9.5)      | 7 (6.7, 7.3)   | 1.1 (0.7, 1.5) | 72 (52, 95)       | 424 (319, 544)    | 286 (170, 421)    | 119 (84, 162)     | 714 (520, 934)    | 474 (268, 728)    | 1.3 (1, 1.6)      | 7.7 (6, 9.4)      | 5.2 (3, 7.2)      |
| Female                       | 5261270  | 3806  | 9.4 (7.4, 11.5)   | 7.3 (5.6, 9)   | 1.2 (0.8, 1.7) | 56 (42, 75)       | 316 (240, 408)    | 235 (141, 342)    | 17 (12, 24)       | 97 (69, 132)      | 70 (39, 108)      | 1.5 (1.2, 1.8)    | 8.3 (6.9, 9.7)    | 6.2 (4.2, 8.1)    |
| Male                         | 5692814  | 5644  | 9.2 (7.1, 11.2)   | 7.1 (5.4, 8.8) | 1.2 (0.8, 1.6) | 94 (74, 119)      | 537 (434, 660)    | 372 (246, 523)    | 23 (17, 31)       | 137 (105, 175)    | 92 (57, 134)      | 1.7 (1.3, 2)      | 9.5 (7.9, 11.1)   | 6.6 (4.4, 8.9)    |
| All                          | 10954084 | 9444  | 9.3 (7.8, 10.8)   | 7.2 (6, 8.4)   | 1.2 (0.9, 1.5) | 150 (124, 182)    | 853 (718, 1004)   | 607 (457, 786)    | 20 (16, 25)       | 117 (95, 142)     | 81 (58, 108)      | 1.6 (1.3, 1.8)    | 9 (8, 10.1)       | 6.4 (4.9, 8)      |
| <b>Tajikistan</b>            |          |       |                   |                |                |                   |                   |                   |                   |                   |                   |                   |                   |                   |
| Age 25-69                    | 1873614  | 2742  | 13.4 (12.3, 14.4) | 5.3 (4.9, 5.7) | 0.6 (0.5, 0.8) | 206 (169, 249)    | 405 (341, 472)    | 75 (50, 106)      | 93 (77, 110)      | 181 (155, 209)    | 34 (23, 48)       | 7.5 (6.2, 8.8)    | 14.8 (12.9, 16.7) | 2.7 (1.9, 3.6)    |
| Age 70+                      | 125895   | 4903  | 13.4 (11.9, 15.1) | 5.1 (4.5, 5.8) | 0.6 (0.4, 0.8) | 255 (186, 328)    | 495 (383, 611)    | 75 (35, 124)      | 1855 (1384, 2355) | 3613 (2841, 4465) | 555 (263, 894)    | 5.2 (3.8, 6.7)    | 10.1 (7.9, 12.4)  | 1.5 (0.7, 2.3)    |
| Female                       | 1030060  | 3960  | 13.5 (10.6, 16.4) | 5.3 (4, 6.7)   | 0.6 (0.3, 1)   | 235 (173, 303)    | 444 (344, 551)    | 74 (41, 116)      | 196 (145, 253)    | 369 (286, 458)    | 62 (34, 97)       | 5.9 (4.6, 7.2)    | 11.2 (9.1, 13.4)  | 1.9 (1, 2.7)      |
| Male                         | 969449   | 3679  | 13.3 (10.4, 16.2) | 5.3 (4, 6.6)   | 0.6 (0.3, 1)   | 226 (174, 283)    | 455 (364, 543)    | 76 (45, 113)      | 219 (172, 268)    | 438 (361, 514)    | 74 (46, 107)      | 6.2 (4.7, 7.7)    | 12.4 (10.1, 14.6) | 2.1 (1.1, 3)      |
| All                          | 1999509  | 7638  | 13.4 (11.4, 15.5) | 5.3 (4.4, 6.2) | 0.6 (0.4, 0.9) | 461 (378, 549)    | 900 (763, 1038)   | 150 (101, 204)    | 207 (172, 244)    | 401 (344, 461)    | 67 (47, 91)       | 6 (5.1, 7)        | 11.8 (10.2, 13.3) | 2 (1.4, 2.5)      |
| <b>Tanzania</b>              |          |       |                   |                |                |                   |                   |                   |                   |                   |                   |                   |                   |                   |
| Age 25-69                    | 8418744  | 2499  | 11.3 (10.5, 12.2) | 3.8 (3.4, 4.1) | 0.7 (0.5, 0.8) | 81 (63, 103)      | 454 (377, 542)    | 72 (49, 98)       | 10 (7, 12)        | 54 (45, 65)       | 9 (6, 12)         | 3.2 (2.6, 3.9)    | 18.2 (15.8, 20.5) | 2.9 (2, 3.8)      |
| Age 70+                      | 388139   | 2005  | 11.2 (9.8, 12.5)  | 3.6 (3.2, 4.1) | 0.6 (0.5, 0.8) | 45 (30, 65)       | 253 (190, 326)    | 34 (18, 54)       | 119 (79, 169)     | 664 (501, 861)    | 88 (48, 140)      | 2.3 (1.6, 3)      | 12.6 (9.6, 15.7)  | 1.7 (0.7, 2.6)    |
| Female                       | 4544822  | 2015  | 11.4 (8.9, 13.9)  | 3.8 (2.8, 4.8) | 0.7 (0.3, 1)   | 56 (40, 75)       | 298 (229, 377)    | 44 (27, 65)       | 14 (10, 18)       | 72 (55, 92)       | 11 (6, 16)        | 2.8 (2, 3.6)      | 14.8 (12.3, 17.3) | 2.2 (1.2, 3.1)    |
| Male                         | 4262061  | 2487  | 11.2 (8.8, 13.7)  | 3.8 (2.8, 4.7) | 0.7 (0.3, 1)   | 70 (52, 90)       | 409 (330, 491)    | 62 (39, 87)       | 17 (13, 22)       | 99 (80, 119)      | 15 (9, 21)        | 2.8 (2, 3.6)      | 16.5 (13.3, 19.5) | 2.5 (1.4, 3.6)    |
| All                          | 8806883  | 4513  | 11.3 (9.6, 13.1)  | 3.8 (3.1, 4.5) | 0.6 (0.4, 0.9) | 126 (103, 153)    | 707 (602, 821)    | 106 (77, 138)     | 15 (12, 19)       | 86 (73, 100)      | 13 (9, 17)        | 2.8 (2.2, 3.4)    | 15.7 (13.8, 17.6) | 2.3 (1.6, 3.1)    |
| <b>Thailand</b>              |          |       |                   |                |                |                   |                   |                   |                   |                   |                   |                   |                   |                   |
| Age 25-69                    | 26221451 | 18009 | 18.3 (16.9, 19.6) | 3 (2.8, 3.2)   | 0.9 (0.8, 0.9) | 3319 (2850, 3821) | 3644 (3126, 4198) | 935 (810, 1075)   | 149 (127, 172)    | 163 (139, 189)    | 42 (36, 48)       | 18.4 (16.4, 20.5) | 20.2 (17.9, 22.5) | 5.2 (4.6, 5.8)    |
| Age 70+                      | 1599896  | 23688 | 18.2 (15.9, 20.3) | 2.9 (2.5, 3.2) | 0.8 (0.7, 0.9) | 2872 (2173, 3586) | 3119 (2366, 3888) | 680 (538, 846)    | 1814 (1371, 2270) | 1971 (1497, 2460) | 429 (339, 532)    | 12.1 (9.6, 14.8)  | 13.2 (10, 16.1)   | 2.9 (2.2, 3.5)    |
| Female                       | 14375868 | 19815 | 18.5 (14.6, 22.5) | 3 (2.2, 3.9)   | 0.9 (0.5, 1.2) | 2849 (2229, 3504) | 3008 (2359, 3696) | 723 (580, 883)    | 278 (213, 346)    | 293 (226, 365)    | 69 (55, 86)       | 14.4 (12.3, 16.6) | 15.2 (12.8, 17.4) | 3.6 (3, 4.2)      |
| Male                         | 13445479 | 21853 | 18.1 (14.2, 21.9) | 2.9 (2.1, 3.8) | 0.9 (0.5, 1.2) | 3341 (2771, 3890) | 3756 (3120, 4365) | 893 (751, 1042)   | 328 (268, 388)    | 369 (301, 435)    | 86 (72, 101)      | 15.3 (12.8, 17.7) | 17.2 (14.5, 19.9) | 4.1 (3.4, 4.8)    |
| All                          | 27821347 | 41675 | 18.3 (15.6, 21.1) | 3 (2.4, 3.6)   | 0.9 (0.6, 1.1) | 6191 (5378, 7033) | 6764 (5882, 7675) | 1616 (1420, 1827) | 302 (258, 347)    | 329 (282, 378)    | 77 (67, 88)       | 14.9 (13.3, 16.4) | 16.2 (14.5, 18)   | 3.9 (3.4, 4.3)    |
| <b>The Bahamas</b>           |          |       |                   |                |                |                   |                   |                   |                   |                   |                   |                   |                   |                   |

|                            |         |      |                   |                |                |             |                |                |                   |                   |                 |                   |                   |                 |
|----------------------------|---------|------|-------------------|----------------|----------------|-------------|----------------|----------------|-------------------|-------------------|-----------------|-------------------|-------------------|-----------------|
| Age 25-69                  | 113963  | 78   | 6.9 (6.3, 7.4)    | 3 (2.7, 3.3)   | 0.5 (0.4, 0.6) | 1 (1, 1)    | 15 (13, 17)    | 1 (1, 2)       | 11 (8, 15)        | 169 (143, 198)    | 12 (7, 18)      | 1.2 (0.9, 1.5)    | 19.3 (17, 21.6)   | 1.4 (0.9, 1.9)  |
| Age 70+                    | 6793    | 98   | 6.8 (6, 7.7)      | 2.9 (2.5, 3.4) | 0.4 (0.3, 0.6) | 1 (0, 1)    | 13 (10, 16)    | 1 (0, 1)       | 115 (71, 171)     | 1959 (1540, 2389) | 116 (54, 197)   | 0.8 (0.4, 1.1)    | 13.4 (10.2, 16.4) | 0.8 (0.3, 1.3)  |
| Female                     | 62583   | 73   | 6.9 (5.4, 8.5)    | 3.1 (2.2, 3.9) | 0.5 (0.2, 0.8) | 1 (0, 1)    | 11 (9, 13)     | 1 (0, 1)       | 14 (9, 21)        | 228 (177, 280)    | 15 (8, 24)      | 0.9 (0.6, 1.2)    | 14.9 (12.6, 17.3) | 1 (0.6, 1.4)    |
| Male                       | 58173   | 102  | 6.8 (5.2, 8.3)    | 2.9 (2.1, 3.8) | 0.5 (0.2, 0.8) | 1 (1, 1)    | 17 (14, 20)    | 1 (1, 2)       | 23 (16, 31)       | 375 (309, 437)    | 25 (14, 37)     | 1 (0.7, 1.4)      | 16.7 (14.1, 19.5) | 1.1 (0.6, 1.6)  |
| All                        | 120756  | 175  | 6.9 (5.8, 8)      | 3 (2.4, 3.6)   | 0.5 (0.3, 0.7) | 2 (1, 2)    | 28 (24, 32)    | 2 (1, 3)       | 18 (14, 23)       | 298 (258, 338)    | 20 (13, 27)     | 1 (0.7, 1.2)      | 16 (14.1, 17.8)   | 1.1 (0.7, 1.4)  |
| <b>The Gambia</b>          |         |      |                   |                |                |             |                |                |                   |                   |                 |                   |                   |                 |
| Age 25-69                  | 311996  | 137  | 10.7 (9.8, 11.6)  | 5.3 (4.8, 5.7) | 0.8 (0.6, 0.9) | 4 (3, 5)    | 21 (16, 27)    | 6 (4, 8)       | 12 (8, 16)        | 67 (52, 85)       | 18 (12, 25)     | 2.7 (2, 3.4)      | 15.6 (13.3, 17.9) | 4.3 (3, 5.6)    |
| Age 70+                    | 11630   | 76   | 10.6 (9.2, 12)    | 5.1 (4.2, 5.9) | 0.7 (0.5, 0.9) | 1 (1, 2)    | 8 (5, 12)      | 2 (1, 3)       | 121 (68, 194)     | 726 (470, 1011)   | 169 (81, 283)   | 1.8 (1, 2.6)      | 11 (8, 13.9)      | 2.6 (1.2, 4)    |
| Female                     | 158607  | 102  | 10.8 (8.5, 13.2)  | 5.3 (4, 6.7)   | 0.8 (0.4, 1.1) | 3 (2, 4)    | 14 (10, 18)    | 4 (2, 5)       | 16 (10, 23)       | 82 (59, 108)      | 22 (14, 33)     | 2.6 (1.7, 3.4)    | 13.5 (10.8, 16.2) | 3.6 (2.2, 5.1)  |
| Male                       | 165019  | 111  | 10.6 (8.2, 12.9)  | 5.2 (3.9, 6.5) | 0.8 (0.4, 1.1) | 2 (2, 3)    | 16 (11, 20)    | 4 (2, 6)       | 15 (9, 21)        | 93 (66, 119)      | 24 (14, 35)     | 2.2 (1.3, 3.1)    | 14.3 (11.3, 17.3) | 3.6 (2.1, 5.1)  |
| All                        | 323626  | 213  | 10.7 (9, 12.3)    | 5.3 (4.3, 6.2) | 0.8 (0.5, 1)   | 5 (4, 7)    | 30 (24, 36)    | 8 (6, 10)      | 15 (11, 20)       | 87 (70, 107)      | 23 (16, 30)     | 2.4 (1.8, 3.1)    | 13.9 (11.8, 15.7) | 3.6 (2.6, 4.7)  |
| <b>Timor-Leste</b>         |         |      |                   |                |                |             |                |                |                   |                   |                 |                   |                   |                 |
| Age 25-69                  | 279376  | 217  | 12.4 (11.2, 13.4) | 3.4 (3.2, 3.7) | 1.1 (0.7, 1.6) | 12 (10, 15) | 42 (34, 50)    | 19 (12, 26)    | 55 (43, 67)       | 192 (156, 230)    | 85 (51, 122)    | 5.6 (4.6, 6.6)    | 19.4 (17, 21.9)   | 8.6 (5.8, 11.3) |
| Age 70+                    | 7238    | 110  | 12.2 (10.5, 13.9) | 3.3 (2.8, 3.8) | 1 (0.4, 1.7)   | 4 (3, 6)    | 14 (11, 19)    | 6 (2, 10)      | 584 (409, 799)    | 2053 (1497, 2636) | 798 (331, 1352) | 3.7 (2.6, 4.9)    | 13.2 (10.2, 16.3) | 5.2 (2, 8.5)    |
| Female                     | 141493  | 163  | 12.5 (9.8, 15.2)  | 3.5 (2.5, 4.4) | 1.2 (0.8, 1.6) | 8 (6, 11)   | 27 (21, 34)    | 12 (7, 18)     | 91 (67, 117)      | 304 (235, 379)    | 131 (70, 195)   | 5.1 (4, 6.2)      | 16.8 (14, 19.6)   | 7.4 (4, 10.9)   |
| Male                       | 145121  | 163  | 12.2 (9.6, 14.9)  | 3.4 (2.5, 4.3) | 1.1 (0.7, 1.5) | 8 (6, 10)   | 29 (23, 35)    | 12 (7, 18)     | 69 (52, 88)       | 258 (204, 314)    | 107 (61, 155)   | 4.8 (3.7, 6.1)    | 17.8 (14.5, 21)   | 7.5 (4.2, 11.1) |
| All                        | 286614  | 325  | 12.4 (10.5, 14.3) | 3.4 (2.8, 4.1) | 1.2 (0.9, 1.4) | 16 (13, 19) | 56 (48, 65)    | 24 (17, 32)    | 80 (66, 96)       | 280 (238, 325)    | 119 (81, 159)   | 5 (4.2, 5.8)      | 17.3 (15.2, 19.4) | 7.5 (5.2, 9.9)  |
| <b>Togo</b>                |         |      |                   |                |                |             |                |                |                   |                   |                 |                   |                   |                 |
| Age 25-69                  | 1201677 | 516  | 11.7 (10.8, 12.5) | 3.2 (2.9, 3.5) | 0.8 (0.6, 0.9) | 20 (16, 25) | 101 (83, 119)  | 20 (14, 28)    | 16 (13, 20)       | 79 (66, 94)       | 16 (11, 22)     | 3.9 (3.2, 4.7)    | 19.5 (16.9, 22)   | 3.9 (2.8, 5.1)  |
| Age 70+                    | 64445   | 422  | 11.6 (10.1, 13)   | 3.1 (2.6, 3.5) | 0.7 (0.5, 0.9) | 11 (8, 16)  | 56 (41, 73)    | 10 (5, 16)     | 179 (118, 247)    | 886 (648, 1150)   | 154 (81, 241)   | 2.7 (1.8, 3.6)    | 13.3 (10.3, 16.2) | 2.3 (1.2, 3.5)  |
| Female                     | 651750  | 534  | 11.8 (9.2, 14.3)  | 3.2 (2.3, 4.1) | 0.8 (0.4, 1.1) | 19 (13, 24) | 86 (68, 105)   | 17 (11, 24)    | 28 (20, 36)       | 128 (101, 157)    | 25 (16, 36)     | 3.5 (2.6, 4.4)    | 16.1 (13.2, 19)   | 3.2 (1.9, 4.4)  |
| Male                       | 614372  | 407  | 11.5 (9, 14)      | 3.1 (2.3, 4)   | 0.7 (0.4, 1.1) | 13 (10, 17) | 71 (56, 86)    | 13 (9, 19)     | 21 (16, 27)       | 112 (89, 135)     | 21 (14, 29)     | 3.2 (2.2, 4.1)    | 17.4 (14.3, 20.4) | 3.3 (1.9, 4.7)  |
| All                        | 1266122 | 940  | 11.7 (9.9, 13.5)  | 3.2 (2.5, 3.8) | 0.8 (0.5, 1)   | 32 (25, 38) | 157 (133, 182) | 30 (22, 39)    | 24 (20, 29)       | 120 (102, 139)    | 23 (17, 30)     | 3.4 (2.7, 4)      | 16.7 (14.7, 18.8) | 3.2 (2.3, 4.1)  |
| <b>Tonga</b>               |         |      |                   |                |                |             |                |                |                   |                   |                 |                   |                   |                 |
| Age 25-69                  | 33070   | 28   | 23 (21.2, 24.7)   | 2.5 (2.3, 2.7) | 0.8 (0.7, 0.9) | 6 (5, 7)    | 6 (5, 7)       | 1 (1, 2)       | 155 (128, 187)    | 155 (128, 187)    | 32 (21, 43)     | 20.4 (18.1, 22.9) | 20.3 (17.9, 22.9) | 4.1 (2.9, 5.2)  |
| Age 70+                    | 2537    | 26   | 22.9 (20.1, 25.8) | 2.5 (2.1, 2.8) | 0.7 (0.5, 0.9) | 4 (3, 5)    | 4 (3, 5)       | 1 (0, 1)       | 1531 (1129, 1980) | 1531 (1129, 1980) | 263 (137, 416)  | 14 (11.2, 17)     | 14.1 (11, 16.9)   | 2.4 (1.3, 3.6)  |
| Female                     | 18261   | 20   | 23.4 (18.4, 28.3) | 2.5 (1.8, 3.3) | 0.8 (0.4, 1.1) | 3 (3, 4)    | 3 (3, 4)       | 1 (0, 1)       | 217 (158, 286)    | 217 (158, 286)    | 40 (22, 64)     | 16.4 (13.9, 19)   | 16.4 (13.4, 19.2) | 3.1 (2, 4.2)    |
| Male                       | 17346   | 34   | 22.6 (17.8, 27.3) | 2.5 (1.8, 3.3) | 0.8 (0.4, 1.1) | 6 (5, 7)    | 6 (5, 7)       | 1 (1, 2)       | 352 (284, 427)    | 352 (284, 427)    | 67 (44, 94)     | 17.8 (14.9, 20.7) | 17.8 (15.2, 20.5) | 3.4 (2, 4.7)    |
| All                        | 35607   | 54   | 22.9 (19.5, 26.3) | 2.5 (2, 3.1)   | 0.8 (0.5, 1)   | 9 (8, 11)   | 9 (8, 11)      | 2 (1, 2)       | 282 (236, 333)    | 282 (236, 333)    | 53 (37, 70)     | 17.3 (15.2, 19.3) | 17.3 (15.5, 19.2) | 3.3 (2.4, 4.2)  |
| <b>Trinidad and Tobago</b> |         |      |                   |                |                |             |                |                |                   |                   |                 |                   |                   |                 |
| Age 25-69                  | 532132  | 739  | 8.7 (8.1, 9.4)    | 5.2 (4.8, 5.6) | 0.5 (0.4, 0.6) | 12 (9, 17)  | 111 (93, 129)  | 13 (8, 19)     | 27 (20, 36)       | 240 (202, 277)    | 29 (18, 41)     | 1.7 (1.3, 2.1)    | 15 (12.9, 16.9)   | 1.8 (1.2, 2.4)  |
| Age 70+                    | 42980   | 817  | 8.7 (7.6, 9.8)    | 5 (4.3, 5.6)   | 0.5 (0.4, 0.6) | 9 (6, 14)   | 87 (67, 105)   | 9 (4, 14)      | 210 (131, 322)    | 2013 (1534, 2452) | 199 (93, 331)   | 1.1 (0.6, 1.6)    | 10.6 (8.3, 13)    | 1 (0.5, 1.7)    |
| Female                     | 300137  | 676  | 8.9 (6.9, 10.9)   | 5.2 (3.9, 6.5) | 0.5 (0.2, 0.9) | 9 (6, 13)   | 82 (66, 98)    | 9 (5, 14)      | 33 (23, 47)       | 303 (246, 363)    | 35 (20, 52)     | 1.3 (0.9, 1.8)    | 12.1 (10.1, 14.3) | 1.4 (0.8, 2)    |
| Male                       | 274975  | 880  | 8.6 (6.7, 10.5)   | 5.1 (3.8, 6.4) | 0.5 (0.2, 0.8) | 12 (9, 17)  | 116 (95, 136)  | 12 (7, 18)     | 47 (34, 66)       | 434 (357, 509)    | 47 (27, 68)     | 1.4 (0.9, 1.9)    | 13.2 (10.8, 15.6) | 1.4 (0.8, 2.1)  |
| All                        | 575112  | 1555 | 8.7 (7.4, 10.1)   | 5.2 (4.3, 6.1) | 0.5 (0.3, 0.8) | 21 (17, 27) | 198 (172, 225) | 22 (15, 29)    | 40 (31, 51)       | 364 (318, 416)    | 41 (28, 54)     | 1.4 (1, 1.7)      | 12.7 (11.2, 14.3) | 1.4 (0.9, 1.8)  |
| <b>Tunisia</b>             |         |      |                   |                |                |             |                |                |                   |                   |                 |                   |                   |                 |
| Age 25-69                  | 3215005 | 3373 | 8.9 (8.2, 9.5)    | 6.8 (6.2, 7.4) | 0.9 (0.8, 0.9) | 72 (51, 98) | 397 (321, 482) | 157 (129, 184) | 22 (16, 30)       | 122 (100, 148)    | 49 (40, 57)     | 2.1 (1.4, 2.7)    | 11.8 (10, 13.6)   | 4.6 (4.1, 5.2)  |
| Age 70+                    | 225211  | 3954 | 8.8 (7.7, 9.9)    | 6.6 (5.6, 7.5) | 0.8 (0.7, 0.9) | 55 (35, 81) | 330 (253, 420) | 111 (88, 140)  | 248 (156, 369)    | 1501 (1138, 1917) | 503 (405, 627)  | 1.4 (0.8, 2)      | 8.4 (6.3, 10.4)   | 2.8 (2.2, 3.4)  |

|                             |          |        |                   |                |                |                      |                      |                    |                   |                   |                   |                |                   |                   |
|-----------------------------|----------|--------|-------------------|----------------|----------------|----------------------|----------------------|--------------------|-------------------|-------------------|-------------------|----------------|-------------------|-------------------|
| Female                      | 1730937  | 2794   | 9 (7, 11)         | 6.8 (5.2, 8.5) | 0.9 (0.5, 1.2) | 48 (32, 72)          | 270 (210, 342)       | 103 (85, 125)      | 34 (22, 52)       | 192 (146, 245)    | 72 (59, 87)       | 1.7 (1, 2.4)   | 9.7 (7.6, 11.5)   | 3.7 (3, 4.3)      |
| Male                        | 1709279  | 4528   | 8.7 (6.8, 10.6)   | 6.7 (5.1, 8.4) | 0.8 (0.5, 1.2) | 78 (55, 113)         | 457 (362, 560)       | 165 (137, 197)     | 48 (34, 68)       | 280 (222, 344)    | 101 (84, 120)     | 1.7 (1.1, 2.5) | 10.1 (8, 12.1)    | 3.6 (3, 4.2)      |
| All                         | 3440216  | 7342   | 8.9 (7.5, 10.3)   | 6.8 (5.6, 8)   | 0.9 (0.6, 1.1) | 126 (97, 164)        | 727 (622, 847)       | 268 (233, 307)     | 41 (31, 53)       | 236 (201, 274)    | 86 (74, 98)       | 1.7 (1.2, 2.2) | 9.9 (8.5, 11.2)   | 3.7 (3.2, 4.1)    |
| <b>Turkey</b>               |          |        |                   |                |                |                      |                      |                    |                   |                   |                   |                |                   |                   |
| Age 25-69                   | 22569441 | 36510  | 9.6 (9.3, 9.9)    | 7.8 (7.4, 8.1) | 0.9 (0.9, 1)   | 837 (668, 1015)      | 3745 (3133, 4358)    | 2072 (1783, 2389)  | 38 (30, 46)       | 170 (143, 197)    | 95 (81, 109)      | 2.3 (1.9, 2.8) | 10.3 (8.8, 11.7)  | 5.7 (4.9, 6.4)    |
| Age 70+                     | 1166340  | 25820  | 9.6 (9.1, 10)     | 7.5 (7, 8)     | 0.9 (0.8, 0.9) | 362 (259, 484)       | 1804 (1370, 2266)    | 838 (659, 1037)    | 307 (220, 408)    | 1525 (1161, 1919) | 710 (562, 876)    | 1.4 (1, 1.9)   | 7 (5.4, 8.6)      | 3.2 (2.5, 4)      |
| Female                      | 11980391 | 23396  | 9.7 (7.6, 11.9)   | 7.8 (5.9, 9.6) | 0.9 (0.6, 1.3) | 425 (330, 539)       | 1962 (1584, 2343)    | 1063 (878, 1258)   | 42 (32, 53)       | 194 (152, 234)    | 103 (86, 124)     | 1.8 (1.3, 2.2) | 8.4 (6.8, 10.1)   | 4.6 (3.7, 5.4)    |
| Male                        | 11755390 | 38969  | 9.5 (7.4, 11.5)   | 7.7 (5.9, 9.5) | 0.9 (0.5, 1.3) | 774 (597, 971)       | 3587 (2895, 4214)    | 1847 (1540, 2172)  | 72 (55, 91)       | 337 (271, 399)    | 172 (143, 202)    | 2 (1.4, 2.5)   | 9.2 (7.5, 11.1)   | 4.7 (3.9, 5.7)    |
| All                         | 23735781 | 62294  | 9.6 (8.1, 11.1)   | 7.8 (6.5, 9)   | 0.9 (0.7, 1.2) | 1199 (994, 1432)     | 5549 (4765, 6321)    | 2910 (2531, 3278)  | 57 (47, 68)       | 264 (227, 300)    | 137 (119, 155)    | 1.9 (1.5, 2.3) | 8.9 (7.7, 10.2)   | 4.7 (4.1, 5.3)    |
| <b>Turkmenistan</b>         |          |        |                   |                |                |                      |                      |                    |                   |                   |                   |                |                   |                   |
| Age 25-69                   | 1385148  | 2763   | 14 (12.9, 15)     | 5.3 (4.8, 5.7) | 0.6 (0.5, 0.7) | 247 (206, 293)       | 421 (357, 484)       | 65 (43, 92)        | 170 (143, 200)    | 285 (244, 328)    | 45 (30, 62)       | 9 (7.6, 10.3)  | 15.2 (13.3, 17.2) | 2.4 (1.6, 3.1)    |
| Age 70+                     | 84729    | 4009   | 13.9 (12.1, 15.8) | 5.1 (4.4, 5.7) | 0.5 (0.4, 0.7) | 238 (179, 308)       | 405 (313, 504)       | 53 (27, 86)        | 2735 (2075, 3501) | 4672 (3633, 5805) | 614 (305, 978)    | 5.9 (4.1, 7.6) | 10.1 (7.7, 12.6)  | 1.3 (0.5, 2.1)    |
| Female                      | 773157   | 3470   | 14 (11, 17)       | 5.3 (4, 6.6)   | 0.6 (0.3, 0.9) | 237 (181, 304)       | 396 (309, 495)       | 56 (32, 87)        | 287 (217, 372)    | 477 (372, 599)    | 68 (38, 105)      | 6.8 (5.4, 8.1) | 11.4 (9.4, 13.5)  | 1.6 (0.9, 2.3)    |
| Male                        | 696720   | 3295   | 13.9 (10.9, 16.9) | 5.2 (3.9, 6.5) | 0.6 (0.3, 0.9) | 249 (203, 297)       | 430 (361, 500)       | 63 (38, 92)        | 365 (299, 434)    | 627 (525, 724)    | 92 (56, 132)      | 7.5 (5.9, 9.3) | 13 (10.8, 15.4)   | 1.9 (1, 2.8)      |
| All                         | 1469877  | 6772   | 14 (11.8, 16.1)   | 5.2 (4.3, 6.2) | 0.6 (0.4, 0.8) | 485 (412, 567)       | 826 (717, 947)       | 119 (82, 162)      | 324 (275, 376)    | 549 (475, 627)    | 79 (56, 110)      | 7.2 (6.1, 8.2) | 12.2 (10.7, 13.8) | 1.8 (1.2, 2.3)    |
| <b>Uganda</b>               |          |        |                   |                |                |                      |                      |                    |                   |                   |                   |                |                   |                   |
| Age 25-69                   | 5527037  | 2084   | 7.6 (7, 8.2)      | 4.2 (3.6, 4.8) | 0.7 (0.6, 0.8) | 36 (23, 52)          | 373 (299, 450)       | 67 (45, 92)        | 6 (4, 9)          | 63 (51, 76)       | 11 (8, 16)        | 1.7 (1.1, 2.4) | 17.9 (15.3, 20.4) | 3.2 (2.2, 4.3)    |
| Age 70+                     | 262715   | 1476   | 7.6 (6.6, 8.6)    | 4 (3.1, 5)     | 0.6 (0.4, 0.8) | 16 (8, 28)           | 178 (129, 238)       | 27 (15, 43)        | 63 (32, 109)      | 707 (507, 942)    | 107 (59, 172)     | 1.1 (0.4, 1.7) | 12.1 (9.4, 14.7)  | 1.8 (0.9, 2.8)    |
| Female                      | 2959369  | 1622   | 7.8 (6, 9.5)      | 4.2 (3.1, 5.3) | 0.7 (0.4, 1)   | 22 (13, 36)          | 233 (175, 299)       | 41 (25, 62)        | 7 (4, 12)         | 79 (59, 101)      | 14 (9, 20)        | 1.4 (0.6, 2.1) | 14.4 (11.5, 17.4) | 2.5 (1.4, 3.8)    |
| Male                        | 2830383  | 1947   | 7.5 (5.8, 9.2)    | 4.1 (3.1, 5.2) | 0.7 (0.3, 1)   | 30 (19, 44)          | 318 (252, 393)       | 52 (33, 73)        | 10 (6, 15)        | 107 (84, 132)     | 18 (11, 25)       | 1.5 (0.8, 2.3) | 16.3 (13.1, 19.4) | 2.7 (1.4, 3.9)    |
| All                         | 5789752  | 3548   | 7.6 (6.4, 8.9)    | 4.2 (3.4, 4.9) | 0.7 (0.4, 0.9) | 52 (37, 71)          | 551 (462, 650)       | 94 (69, 122)       | 9 (6, 12)         | 93 (78, 109)      | 16 (12, 21)       | 1.5 (0.9, 2)   | 15.5 (13.4, 17.8) | 2.6 (1.8, 3.5)    |
| <b>Ukraine</b>              |          |        |                   |                |                |                      |                      |                    |                   |                   |                   |                |                   |                   |
| Age 25-69                   | 29613800 | 66942  | 14 (13, 15.1)     | 7.2 (6.7, 7.8) | 0.9 (0.8, 0.9) | 5665 (4463, 6952)    | 7060 (5676, 8558)    | 3103 (2626, 3627)  | 179 (144, 219)    | 223 (180, 268)    | 98 (84, 114)      | 8.5 (7.2, 9.9) | 10.5 (9, 12.1)    | 4.6 (4.1, 5.2)    |
| Age 70+                     | 3951365  | 173499 | 14.1 (12.1, 16)   | 7 (6, 7.9)     | 0.8 (0.7, 0.9) | 10604 (7517, 14343)  | 12873 (9284, 16982)  | 4919 (3876, 6211)  | 2614 (1849, 3560) | 3187 (2310, 4223) | 1221 (955, 1532)  | 6.1 (4.3, 8)   | 7.4 (5.2, 9.6)    | 2.8 (2.2, 3.5)    |
| Female                      | 18867585 | 144078 | 14.2 (11.1, 17.2) | 7.2 (5.5, 9)   | 0.9 (0.5, 1.2) | 9496 (6470, 13230)   | 11177 (7815, 15134)  | 4544 (3436, 5749)  | 594 (393, 854)    | 699 (470, 977)    | 282 (210, 364)    | 6.6 (5.3, 7.8) | 7.8 (6.4, 9.1)    | 3.1 (2.7, 3.6)    |
| Male                        | 14697580 | 95961  | 13.8 (10.9, 16.8) | 7.1 (5.4, 8.8) | 0.9 (0.5, 1.2) | 6773 (5113, 8463)    | 8756 (6744, 10727)   | 3478 (2918, 4077)  | 542 (400, 696)    | 703 (535, 878)    | 275 (228, 328)    | 7.1 (5.6, 8.7) | 9.1 (7.2, 11)     | 3.6 (3.1, 4.2)    |
| All                         | 33565165 | 240484 | 14 (11.9, 16.2)   | 7.2 (6, 8.4)   | 0.9 (0.6, 1.1) | 16270 (12882, 20345) | 19933 (16023, 24443) | 8023 (6799, 9332)  | 571 (442, 720)    | 700 (554, 867)    | 279 (237, 330)    | 6.8 (5.8, 7.8) | 8.3 (7.2, 9.5)    | 3.3 (3, 3.7)      |
| <b>United Arab Emirates</b> |          |        |                   |                |                |                      |                      |                    |                   |                   |                   |                |                   |                   |
| Age 25-69                   | 949222   | 697    | 10.8 (9.7, 11.9)  | 5.4 (4.9, 5.9) | 0.9 (0.8, 0.9) | 23 (17, 32)          | 117 (94, 146)        | 39 (31, 48)        | 22 (16, 31)       | 113 (91, 142)     | 38 (30, 46)       | 3.3 (2.3, 4.3) | 16.8 (13.8, 19.8) | 5.6 (4.6, 6.6)    |
| Age 70+                     | 11704    | 334    | 10.8 (9.6, 12)    | 5.2 (4.5, 5.9) | 0.8 (0.7, 0.9) | 6 (4, 10)            | 33 (24, 42)          | 9 (7, 11)          | 513 (324, 764)    | 2740 (2045, 3492) | 754 (584, 956)    | 1.9 (1.1, 2.7) | 9.9 (7.4, 12.4)   | 2.7 (2.1, 3.3)    |
| Female                      | 244990   | 267    | 11.1 (8.7, 13.5)  | 5.5 (4.1, 6.9) | 0.9 (0.5, 1.2) | 7 (5, 10)            | 32 (26, 40)          | 10 (8, 13)         | 16 (11, 23)       | 72 (55, 90)       | 25 (19, 31)       | 2.7 (1.5, 3.8) | 12.2 (9.2, 15.1)  | 3.8 (3, 4.7)      |
| Male                        | 715936   | 763    | 10.7 (8.4, 13.1)  | 5.3 (4, 6.7)   | 0.9 (0.5, 1.2) | 22 (16, 31)          | 118 (94, 146)        | 38 (30, 46)        | 26 (18, 38)       | 139 (111, 175)    | 45 (36, 57)       | 2.9 (1.7, 4.1) | 15.4 (12.1, 18.9) | 4.9 (3.9, 6.1)    |
| All                         | 960926   | 1026   | 10.8 (9.2, 12.5)  | 5.4 (4.4, 6.3) | 0.9 (0.6, 1.1) | 29 (22, 38)          | 150 (127, 179)       | 48 (40, 57)        | 24 (18, 32)       | 123 (101, 152)    | 40 (33, 49)       | 2.8 (1.9, 3.7) | 14.6 (12, 17.3)   | 4.7 (3.9, 5.4)    |
| <b>United Kingdom</b>       |          |        |                   |                |                |                      |                      |                    |                   |                   |                   |                |                   |                   |
| Age 25-69                   | 31796738 | 51365  | 14.3 (14.1, 14.5) | 5.1 (4.9, 5.2) | 1.6 (1.5, 1.6) | 4469 (3655, 5358)    | 7411 (6072, 8846)    | 5858 (5113, 6566)  | 148 (121, 178)    | 245 (202, 293)    | 194 (170, 218)    | 8.7 (7.6, 9.7) | 14.4 (12.7, 16.2) | 11.4 (10.5, 12.3) |
| Age 70+                     | 6116798  | 133615 | 14.3 (14, 14.6)   | 4.9 (4.6, 5.1) | 1.4 (1.4, 1.5) | 8565 (6740, 10645)   | 13928 (11110, 17164) | 9886 (8368, 11584) | 1499 (1173, 1858) | 2445 (1933, 2995) | 1724 (1457, 2021) | 6.4 (5.1, 7.8) | 10.4 (8.3, 12.5)  | 7.4 (6.4, 8.5)    |
| Female                      | 19949489 | 86759  | 14.5 (11.4, 17.6) | 5.1 (3.8, 6.4) | 1.6 (1.1, 2)   | 5988 (4379, 7872)    | 9354 (6851, 12176)   | 6908 (5541, 8279)  | 311 (221, 414)    | 484 (347, 639)    | 357 (283, 429)    | 6.9 (5.8, 8)   | 10.8 (9.2, 12.4)  | 8 (7.2, 8.8)      |
| Male                        | 17964047 | 98146  | 14.2 (11.1, 17.2) | 5 (3.7, 6.2)   | 1.5 (1.1, 2)   | 7046 (5638, 8452)    | 11985 (9564, 14278)  | 8837 (7807, 10000) | 451 (352, 542)    | 766 (603, 915)    | 560 (491, 639)    | 7.2 (6.1, 8.3) | 12.2 (10.3, 14.2) | 9 (8, 9.9)        |

|                      |           |        |                   |                |                |                      |                      |                        |                  |                   |                   |                   |                   |                   |
|----------------------|-----------|--------|-------------------|----------------|----------------|----------------------|----------------------|------------------------|------------------|-------------------|-------------------|-------------------|-------------------|-------------------|
| All                  | 37913536  | 184741 | 14.3 (12.1, 16.5) | 5 (4.1, 5.9)   | 1.5 (1.2, 1.9) | 13034 (10957, 15241) | 21339 (18091, 24691) | 15744 (14007, 17632)   | 378 (315, 443)   | 620 (521, 718)    | 455 (402, 511)    | 7 (6.3, 7.9)      | 11.6 (10.3, 12.8) | 8.5 (7.8, 9.1)    |
| <b>United States</b> |           |        |                   |                |                |                      |                      |                        |                  |                   |                   |                   |                   |                   |
| Age 25-69            | 137454961 | 162697 | 12.4 (12.2, 12.6) | 6.3 (6.2, 6.4) | 2.8 (2.7, 2.9) | 8281 (6723, 9762)    | 20213 (16393, 23741) | 37830 (33601, 42298)   | 72 (58, 84)      | 175 (142, 206)    | 328 (292, 366)    | 5.1 (4.5, 5.7)    | 12.4 (11.2, 13.8) | 23.3 (21.5, 25.1) |
| Age 70+              | 21115466  | 484846 | 12.4 (12.1, 12.7) | 6 (5.9, 6.2)   | 2.6 (2.4, 2.8) | 18337 (13323, 23494) | 42704 (31795, 53259) | 74250 (61974, 86797)   | 976 (701, 1282)  | 2273 (1669, 2898) | 3936 (3244, 4665) | 3.8 (3, 4.6)      | 8.8 (7, 10.7)     | 15.3 (13.3, 17.4) |
| Female               | 83465741  | 323112 | 12.6 (9.8, 15.3)  | 6.3 (4.8, 7.8) | 2.8 (2.2, 3.4) | 13454 (9263, 17805)  | 29443 (20800, 38092) | 53060 (42385, 64444)   | 183 (123, 248)   | 399 (274, 526)    | 717 (569, 879)    | 4.2 (3.5, 4.8)    | 9.1 (7.7, 10.4)   | 16.4 (14.8, 18)   |
| Male                 | 75104686  | 324664 | 12.2 (9.6, 14.9)  | 6.2 (4.7, 7.7) | 2.7 (2.1, 3.3) | 13164 (10471, 16148) | 33474 (26755, 40560) | 59020 (51440, 67029)   | 211 (165, 262)   | 534 (424, 653)    | 941 (812, 1073)   | 4.1 (3.3, 4.7)    | 10.3 (8.7, 11.9)  | 18.2 (16.4, 19.8) |
| All                  | 158570427 | 647772 | 12.4 (10.5, 14.3) | 6.2 (5.2, 7.3) | 2.8 (2.3, 3.2) | 26618 (21577, 31872) | 62917 (51673, 74231) | 112080 (99175, 126016) | 197 (156, 238)   | 464 (376, 555)    | 826 (728, 930)    | 4.1 (3.6, 4.6)    | 9.7 (8.7, 10.7)   | 17.3 (16.1, 18.5) |
| <b>Uruguay</b>       |           |        |                   |                |                |                      |                      |                        |                  |                   |                   |                   |                   |                   |
| Age 25-69            | 1577284   | 1559   | 9.2 (8.5, 9.9)    | 5.1 (4.7, 5.5) | 1 (0.9, 1)     | 25 (17, 35)          | 227 (176, 272)       | 84 (70, 98)            | 15 (10, 21)      | 138 (108, 166)    | 51 (43, 60)       | 1.6 (1.2, 2)      | 14.6 (12.8, 16.3) | 5.4 (4.8, 6)      |
| Age 70+              | 235032    | 3401   | 9.2 (8, 10.4)     | 5 (4.3, 5.6)   | 0.9 (0.8, 1)   | 36 (23, 55)          | 355 (271, 436)       | 115 (95, 141)          | 165 (103, 258)   | 1617 (1195, 2035) | 525 (423, 651)    | 1.1 (0.6, 1.5)    | 10.4 (8.1, 12.7)  | 3.4 (2.8, 4)      |
| Female               | 962894    | 2136   | 9.3 (7.2, 11.3)   | 5.2 (3.9, 6.5) | 1 (0.6, 1.3)   | 25 (15, 41)          | 232 (168, 300)       | 81 (65, 101)           | 33 (19, 57)      | 310 (210, 417)    | 107 (83, 137)     | 1.2 (0.8, 1.5)    | 10.9 (9.2, 12.6)  | 3.8 (3.3, 4.3)    |
| Male                 | 849422    | 2827   | 9.1 (7.1, 11.1)   | 5 (3.8, 6.3)   | 0.9 (0.6, 1.3) | 36 (25, 52)          | 349 (277, 421)       | 118 (99, 137)          | 46 (31, 66)      | 442 (343, 539)    | 148 (122, 174)    | 1.3 (0.9, 1.7)    | 12.4 (10.4, 14.3) | 4.2 (3.6, 4.7)    |
| All                  | 1812316   | 4958   | 9.2 (7.7, 10.6)   | 5.1 (4.2, 6)   | 0.9 (0.7, 1.2) | 61 (45, 82)          | 582 (482, 684)       | 199 (172, 228)         | 39 (28, 55)      | 372 (300, 442)    | 126 (107, 148)    | 1.2 (1, 1.5)      | 11.7 (10.3, 13.1) | 4 (3.6, 4.4)      |
| <b>Uzbekistan</b>    |           |        |                   |                |                |                      |                      |                        |                  |                   |                   |                   |                   |                   |
| Age 25-69            | 7674238   | 12738  | 11.4 (10.4, 12.3) | 5 (4.6, 5.4)   | 0.8 (0.8, 0.9) | 449 (347, 573)       | 1982 (1671, 2299)    | 582 (506, 668)         | 55 (43, 69)      | 235 (200, 270)    | 70 (61, 80)       | 3.5 (2.7, 4.3)    | 15.6 (13.4, 17.7) | 4.6 (4, 5.1)      |
| Age 70+              | 518737    | 25565  | 11.4 (9.9, 13)    | 4.8 (4.2, 5.4) | 0.8 (0.7, 0.8) | 616 (393, 911)       | 2647 (1968, 3350)    | 669 (520, 833)         | 1079 (709, 1559) | 4690 (3603, 5859) | 1189 (934, 1458)  | 2.4 (1.5, 3.2)    | 10.4 (8.2, 12.8)  | 2.6 (2.1, 3.1)    |
| Female               | 4266540   | 20077  | 11.5 (9, 14)      | 5.1 (3.8, 6.3) | 0.9 (0.5, 1.2) | 552 (366, 813)       | 2290 (1685, 2886)    | 627 (497, 771)         | 115 (76, 167)    | 473 (357, 595)    | 130 (104, 161)    | 2.8 (2, 3.6)      | 11.4 (9.3, 13.5)  | 3.1 (2.6, 3.6)    |
| Male                 | 3926435   | 18232  | 11.3 (8.8, 13.8)  | 5 (3.7, 6.2)   | 0.8 (0.5, 1.2) | 513 (362, 692)       | 2339 (1878, 2805)    | 624 (523, 750)         | 130 (95, 173)    | 592 (485, 704)    | 159 (134, 188)    | 2.8 (2, 3.6)      | 12.8 (10.5, 15.1) | 3.4 (2.8, 4)      |
| All                  | 8192975   | 38315  | 11.4 (9.6, 13.1)  | 5 (4.1, 5.9)   | 0.8 (0.6, 1.1) | 1065 (804, 1383)     | 4629 (3873, 5428)    | 1251 (1076, 1439)      | 122 (94, 158)    | 531 (448, 618)    | 144 (124, 165)    | 2.8 (2.2, 3.3)    | 12.1 (10.5, 13.6) | 3.3 (2.9, 3.7)    |
| <b>Vanuatu</b>       |           |        |                   |                |                |                      |                      |                        |                  |                   |                   |                   |                   |                   |
| Age 25-69            | 52092     | 57     | 26.3 (24.2, 28.5) | 2 (1.9, 2.2)   | 0.7 (0.6, 0.9) | 13 (9, 17)           | 13 (9, 17)           | 2 (1, 3)               | 253 (176, 346)   | 253 (176, 346)    | 45 (26, 67)       | 22.6 (19.8, 25.3) | 22.3 (19.7, 24.9) | 4 (2.8, 5.2)      |
| Age 70+              | 3265      | 27     | 26.1 (22.9, 29.4) | 2 (1.7, 2.2)   | 0.7 (0.5, 0.9) | 4 (2, 6)             | 4 (2, 6)             | 1 (0, 1)               | 1208 (649, 1861) | 1208 (649, 1861)  | 179 (68, 330)     | 15 (11.5, 18.3)   | 14.9 (11.5, 18.1) | 2.2 (1, 3.4)      |
| Female               | 27100     | 26     | 26.6 (21, 32.3)   | 2.1 (1.4, 2.7) | 0.7 (0.4, 1.1) | 5 (3, 7)             | 5 (3, 7)             | 1 (0, 1)               | 185 (118, 259)   | 185 (118, 259)    | 32 (18, 49)       | 19.1 (16, 22.5)   | 19 (15.8, 22.1)   | 3.2 (1.9, 4.5)    |
| Male                 | 28257     | 59     | 26.1 (20.6, 31.6) | 2 (1.4, 2.6)   | 0.7 (0.4, 1.1) | 12 (8, 16)           | 12 (8, 16)           | 2 (1, 3)               | 412 (263, 569)   | 412 (263, 569)    | 70 (36, 115)      | 20.3 (16.7, 23.6) | 20.4 (17.1, 23.8) | 3.5 (2, 5)        |
| All                  | 55357     | 84     | 26.4 (22.5, 30.3) | 2 (1.6, 2.5)   | 0.7 (0.5, 1)   | 17 (12, 22)          | 17 (12, 22)          | 3 (2, 4)               | 299 (217, 393)   | 299 (217, 393)    | 51 (31, 73)       | 20 (17.6, 22.4)   | 20.2 (17.9, 22.4) | 3.4 (2.4, 4.4)    |
| <b>Venezuela</b>     |           |        |                   |                |                |                      |                      |                        |                  |                   |                   |                   |                   |                   |
| Age 25-69            | 7938353   | 6247   | 6.4 (5.9, 6.8)    | 6.8 (6.2, 7.3) | 1.2 (1.2, 1.3) | 133 (97, 184)        | 750 (617, 896)       | 554 (480, 629)         | 20 (14, 27)      | 112 (92, 134)     | 82 (71, 93)       | 2.1 (1.5, 2.8)    | 12 (10.1, 13.8)   | 8.9 (7.9, 9.9)    |
| Age 70+              | 429093    | 6826   | 6.3 (5.6, 7.1)    | 6.6 (5.7, 7.3) | 1.1 (1, 1.3)   | 93 (56, 137)         | 565 (426, 703)       | 366 (305, 439)         | 230 (140, 349)   | 1407 (1047, 1760) | 907 (750, 1090)   | 1.4 (0.8, 1.9)    | 8.3 (6.4, 10.3)   | 5.4 (4.3, 6.5)    |
| Female               | 4203546   | 5432   | 6.4 (5, 7.9)      | 6.8 (5.2, 8.5) | 1.2 (0.8, 1.7) | 89 (61, 131)         | 515 (400, 640)       | 364 (305, 426)         | 27 (18, 41)      | 155 (118, 195)    | 109 (90, 128)     | 1.6 (1, 2.2)      | 9.5 (7.8, 11.5)   | 6.7 (5.7, 7.6)    |
| Male                 | 4163900   | 7640   | 6.3 (4.8, 7.7)    | 6.7 (5.1, 8.3) | 1.2 (0.8, 1.6) | 137 (96, 193)        | 800 (645, 969)       | 556 (475, 636)         | 41 (28, 59)      | 241 (193, 294)    | 167 (141, 191)    | 1.8 (1.1, 2.5)    | 10.5 (8.3, 12.7)  | 7.3 (6.2, 8.4)    |
| All                  | 8367446   | 13072  | 6.3 (5.3, 7.4)    | 6.8 (5.6, 7.9) | 1.2 (0.9, 1.5) | 226 (171, 289)       | 1315 (1114, 1525)    | 921 (822, 1025)        | 34 (25, 45)      | 198 (167, 231)    | 137 (122, 154)    | 1.7 (1.3, 2.1)    | 10.1 (8.6, 11.5)  | 7 (6.3, 7.8)      |
| <b>Vietnam</b>       |           |        |                   |                |                |                      |                      |                        |                  |                   |                   |                   |                   |                   |
| Age 25-69            | 25906496  | 6344   | 13.7 (12.6, 14.9) | 2.3 (2.1, 2.5) | 0.8 (0.8, 0.9) | 519 (419, 632)       | 1305 (1057, 1580)    | 267 (211, 329)         | 20 (16, 24)      | 50 (41, 59)       | 10 (8, 13)        | 8.2 (7.1, 9.2)    | 20.6 (17.8, 23.1) | 4.2 (3.7, 4.8)    |
| Age 70+              | 2046699   | 8807   | 13.7 (11.8, 15.5) | 2.2 (1.9, 2.6) | 0.8 (0.7, 0.8) | 496 (356, 657)       | 1238 (902, 1606)     | 221 (163, 296)         | 260 (184, 348)   | 644 (465, 838)    | 114 (84, 154)     | 5.6 (4.3, 7)      | 14.1 (11, 16.9)   | 2.5 (1.9, 3.1)    |
| Female               | 14900096  | 6864   | 13.9 (10.9, 16.9) | 2.3 (1.6, 3.1) | 0.8 (0.5, 1.2) | 465 (348, 601)       | 1103 (835, 1408)     | 220 (169, 284)         | 34 (25, 45)      | 81 (60, 105)      | 16 (12, 21)       | 6.8 (5.6, 8)      | 16.1 (13.6, 18.5) | 3.2 (2.6, 3.8)    |
| Male                 | 13053099  | 8266   | 13.5 (10.6, 16.5) | 2.3 (1.6, 3)   | 0.8 (0.4, 1.1) | 550 (422, 693)       | 1440 (1133, 1806)    | 268 (203, 338)         | 42 (32, 52)      | 109 (86, 135)     | 20 (16, 26)       | 6.6 (5.3, 7.8)    | 17.4 (14.6, 20.2) | 3.2 (2.6, 3.9)    |
| All                  | 27953195  | 15194  | 13.7 (11.6, 15.8) | 2.3 (1.8, 2.8) | 0.8 (0.6, 1.1) | 1015 (854, 1208)     | 2543 (2151, 3004)    | 488 (401, 585)         | 38 (32, 45)      | 94 (79, 111)      | 18 (15, 22)       | 6.7 (5.7, 7.6)    | 16.7 (14.8, 18.7) | 3.2 (2.8, 3.7)    |
| <b>Yemen</b>         |           |        |                   |                |                |                      |                      |                        |                  |                   |                   |                   |                   |                   |

|                 |         |      |                   |                |                |                |                  |                |                 |                   |                 |                |                   |                 |
|-----------------|---------|------|-------------------|----------------|----------------|----------------|------------------|----------------|-----------------|-------------------|-----------------|----------------|-------------------|-----------------|
| Age 25-69       | 3320163 | 3692 | 13.4 (12.4, 14.4) | 3.2 (2.9, 3.5) | 1.2 (0.9, 1.4) | 294 (231, 363) | 725 (586, 869)   | 317 (224, 418) | 90 (70, 112)    | 223 (179, 269)    | 97 (68, 130)    | 7.9 (6.7, 9.2) | 19.6 (17, 22.3)   | 8.5 (6.2, 11.1) |
| Age 70+         | 147919  | 2485 | 13.4 (11.7, 15.2) | 3.1 (2.6, 3.6) | 1.1 (0.7, 1.5) | 134 (96, 180)  | 333 (248, 432)   | 129 (75, 196)  | 923 (663, 1230) | 2305 (1716, 2967) | 888 (527, 1355) | 5.4 (4.1, 6.9) | 13.4 (10.3, 16.5) | 5.2 (3, 7.6)    |
| Female          | 1830501 | 2993 | 13.7 (10.7, 16.6) | 3.3 (2.4, 4.2) | 1.2 (0.8, 1.6) | 213 (161, 269) | 495 (382, 616)   | 210 (133, 301) | 115 (87, 146)   | 268 (206, 333)    | 113 (72, 162)   | 7.1 (5.6, 8.6) | 16.5 (13.7, 19.4) | 7 (4.4, 10)     |
| Male            | 1637581 | 3184 | 13.2 (10.4, 16.1) | 3.2 (2.3, 4.1) | 1.2 (0.8, 1.6) | 215 (162, 269) | 563 (433, 687)   | 236 (158, 328) | 137 (103, 172)  | 360 (275, 440)    | 150 (100, 209)  | 6.8 (5.2, 8.4) | 17.7 (14.4, 21.2) | 7.4 (4.3, 10.6) |
| All             | 3468082 | 6192 | 13.5 (11.4, 15.5) | 3.2 (2.6, 3.9) | 1.2 (0.9, 1.5) | 428 (357, 508) | 1058 (896, 1236) | 445 (330, 564) | 126 (104, 150)  | 313 (264, 366)    | 131 (98, 167)   | 6.9 (5.8, 8)   | 17.1 (14.9, 19.2) | 7.2 (5, 9.2)    |
| <b>Zambia</b>   |         |      |                   |                |                |                |                  |                |                 |                   |                 |                |                   |                 |
| Age 25-69       | 2574727 | 1226 | 5.7 (5.2, 6.3)    | 4.3 (4, 4.7)   | 0.6 (0.5, 0.8) | 19 (13, 25)    | 206 (169, 246)   | 34 (23, 47)    | 7 (5, 9)        | 77 (63, 91)       | 12 (8, 18)      | 1.5 (1.1, 1.9) | 16.8 (14.6, 19.1) | 2.7 (1.8, 3.6)  |
| Age 70+         | 125336  | 1024 | 5.7 (4.9, 6.5)    | 4.2 (3.6, 4.8) | 0.6 (0.4, 0.8) | 10 (6, 15)     | 121 (90, 153)    | 17 (9, 26)     | 81 (50, 122)    | 972 (724, 1232)   | 135 (73, 213)   | 1 (0.6, 1.4)   | 11.8 (9, 14.5)    | 1.6 (0.8, 2.5)  |
| Female          | 1380457 | 1047 | 5.8 (4.5, 7.2)    | 4.4 (3.2, 5.5) | 0.7 (0.3, 1)   | 13 (9, 18)     | 146 (115, 180)   | 23 (14, 34)    | 10 (7, 14)      | 114 (89, 140)     | 18 (10, 27)     | 1.2 (0.8, 1.7) | 14 (11.3, 16.6)   | 2.2 (1.2, 3.2)  |
| Male            | 1319606 | 1205 | 5.6 (4.3, 6.9)    | 4.3 (3.2, 5.4) | 0.6 (0.3, 1)   | 16 (11, 22)    | 181 (144, 217)   | 27 (17, 39)    | 12 (8, 16)      | 134 (106, 160)    | 20 (12, 28)     | 1.3 (0.8, 1.9) | 15 (12.1, 17.8)   | 2.2 (1.3, 3.2)  |
| All             | 2700063 | 2250 | 5.7 (4.8, 6.7)    | 4.3 (3.5, 5.1) | 0.6 (0.4, 0.9) | 29 (22, 36)    | 327 (279, 378)   | 50 (36, 67)    | 11 (8, 14)      | 124 (106, 143)    | 19 (14, 25)     | 1.3 (0.9, 1.6) | 14.6 (12.6, 16.6) | 2.2 (1.5, 3)    |
| <b>Zimbabwe</b> |         |      |                   |                |                |                |                  |                |                 |                   |                 |                |                   |                 |
| Age 25-69       | 3354336 | 746  | 7.4 (6.9, 7.9)    | 4.3 (4, 4.7)   | 0.7 (0.5, 1)   | 11 (8, 15)     | 125 (103, 148)   | 29 (18, 43)    | 4 (3, 5)        | 40 (33, 48)       | 9 (5, 14)       | 1.5 (1.1, 1.9) | 16.7 (14.5, 19)   | 3.9 (2.3, 5.5)  |
| Age 70+         | 189770  | 1351 | 7.3 (6.4, 8.2)    | 4.2 (3.6, 4.7) | 0.7 (0.4, 1)   | 13 (8, 19)     | 157 (120, 197)   | 31 (13, 57)    | 73 (44, 111)    | 879 (667, 1113)   | 173 (74, 323)   | 1 (0.6, 1.4)   | 11.6 (9.2, 14.3)  | 2.3 (0.8, 3.8)  |
| Female          | 1802591 | 1180 | 7.4 (5.8, 9.1)    | 4.4 (3.2, 5.5) | 0.8 (0.4, 1.1) | 13 (9, 20)     | 154 (120, 192)   | 34 (16, 58)    | 10 (6, 15)      | 112 (85, 143)     | 24 (11, 44)     | 1.1 (0.7, 1.5) | 13 (10.5, 15.5)   | 2.9 (1.3, 4.4)  |
| Male            | 1741515 | 918  | 7.3 (5.7, 8.9)    | 4.3 (3.2, 5.4) | 0.7 (0.4, 1.1) | 11 (8, 15)     | 128 (102, 156)   | 26 (14, 42)    | 7 (5, 10)       | 86 (67, 106)      | 17 (9, 29)      | 1.2 (0.7, 1.7) | 14 (11.3, 16.8)   | 2.9 (1.2, 4.5)  |
| All             | 3544106 | 2097 | 7.3 (6.2, 8.5)    | 4.3 (3.5, 5.1) | 0.7 (0.5, 1)   | 24 (18, 31)    | 282 (237, 327)   | 60 (39, 88)    | 8 (6, 11)       | 99 (82, 117)      | 21 (13, 32)     | 1.2 (0.8, 1.5) | 13.5 (11.6, 15.4) | 2.9 (1.7, 4)    |

\*Mean intake level (95%UI) was weighted based on the population in each country-, age- and sex-specific stratum in 2010

†Model decreases SFA to minimally 10% energy but only if it can be isocalorically replaced with n-6 PUFA to maximally 12% of energy

‡Model increases n-6 PUFA to 12% of energy and replaces it isocalorically with either carbohydrates or SFA.

§ Model decreases TFA to 0.5% of energy and replaces it isocalorically with n-6 PUFA or monounsaturated fats or SFA

Abbreviation: CHD, Ischemic Heart Disease; UI, Uncertainly Interval; E, energy; n-6 PUFA, omega-6 polyunsaturated fatty acid; SFA, saturated fatty acid; TFA, trans fatty acid.
